# Supplementary material
Source: PubMed Central journal article supplement (PMC5502611)
Supplement: pnas.1701785114.sapp.pdf [file pnas.1701785114.sapp.pdf]

*SI Appendix*

**Synthesis of asymmetrical multi-antennary human milk oligosaccharides**

*Anthony R. Prudden, Lin Liu, Chantelle J. Capicciotti, Margreet A. Wolfert, Shuo Wang,  
Zhongwei Gao, Lu Meng, Kelley W. Moremen, Geert-Jan Boons\**

# Table of Contents

|                                                                                              |      |
|----------------------------------------------------------------------------------------------|------|
| <b>1. Chemical Synthesis</b>                                                                 |      |
| a. Materials and Methods .....                                                               | S3   |
| b. Anomeric Linker Synthesis (Fig. S1) .....                                                 | S4   |
| c. Installation of Anomeric Linker.....                                                      | S7   |
| d. NMR & MS Data .....                                                                       | S7   |
| <b>2. Enzymatic Synthesis</b>                                                                |      |
| a. Materials and Methods .....                                                               | S18  |
| b. Human Glycosyl Transferase Expression .....                                               | S18  |
| c. General Procedures for Enzymatic Synthesis (Table S1) .....                               | S19  |
| d. Enzymatic Flowchart of HMO Library Members (Figs S2-S9).....                              | S22  |
| e. Identification Numbers for Printed HMO Library Members (Fig. S10 and Table S2).....       | S26  |
| f. HPLC Traces (Figs S11-S13).....                                                           | S27  |
| <b>3. NMR and MS</b>                                                                         |      |
| a. NMR Nomenclature .....                                                                    | S29  |
| b. Structure Elucidation of Compound <b>5</b> by 1D and 2D NMR Analysis (Figs S14-S17) ..... | S30  |
| c. NMR Analysis of Fucose Connectivity for Compound <b>21</b> (Figs S18-S21).....            | S32  |
| d. NMR & MS Data for Library Members.....                                                    | S34  |
| <b>4. Microarray Procedure</b>                                                               |      |
| a. Materials and Methods .....                                                               | S246 |
| b. VP8* Expression.....                                                                      | S246 |
| c. Screening Procedure .....                                                                 | S246 |
| Screening of the HMO Library (Fig. S22) .....                                                | S248 |
| <b>5. References</b> .....                                                                   | S249 |
| <b>6. Abbreviations</b> .....                                                                | S250 |

## 1. Chemical Synthesis

### 1.a. Materials and Methods

<sup>1</sup>H spectra were recorded on a 500 MHz Varian Inova or 600 MHz Agilent DD2. Chemical shifts are reported in parts per million (ppm) relative to tetramethylsilane (TMS) as the internal standard. NMR data is represented as follows: chemical shift, multiplicity (s = singlet, d = doublet, t = triplet, dd = doublet of doublets, m = multiplet and / or multiple resonances, br. = broad signal), *J* coupling, integration and peak identity. NMR signals were assigned on the basis of <sup>1</sup>H NMR, gCOSY, gHSQC, and zTOCSY, experiments. Mass spectra were collected using an Applied Biosystems SCIEX MALDI TOF / TOF 5800 using 2,5-dihydroxybenzoic acid (DHB) as a matrix. Preparatory HPLC was performed using an Agilent Technologies 1200 Series equipped with a diode array multiple wavelength detector SL for compound visualization. An Eclipse XBD-C18 (21.2 x 250 mm, 7 μm) column was used for separation. Normal phase column chromatography was performed on silica gel G60 (Silicycle, 60 - 2000 μm, 60Å). Thin layer chromatography (TLC) was conducted on Silica gel 60 F<sub>254</sub> (EMD Chemicals, Inc.) with detection by UV-absorption (254 nm) where applicable. Visualization of TLC plates was accomplished by spraying with 10% sulfuric acid in ethanol, Hanessian's Stain or Ninhydrin, followed by charring at ~150 °C. Reagents were purchased from commercial sources and used without further purification.

## 1.b. Anomeric Linker Synthesis

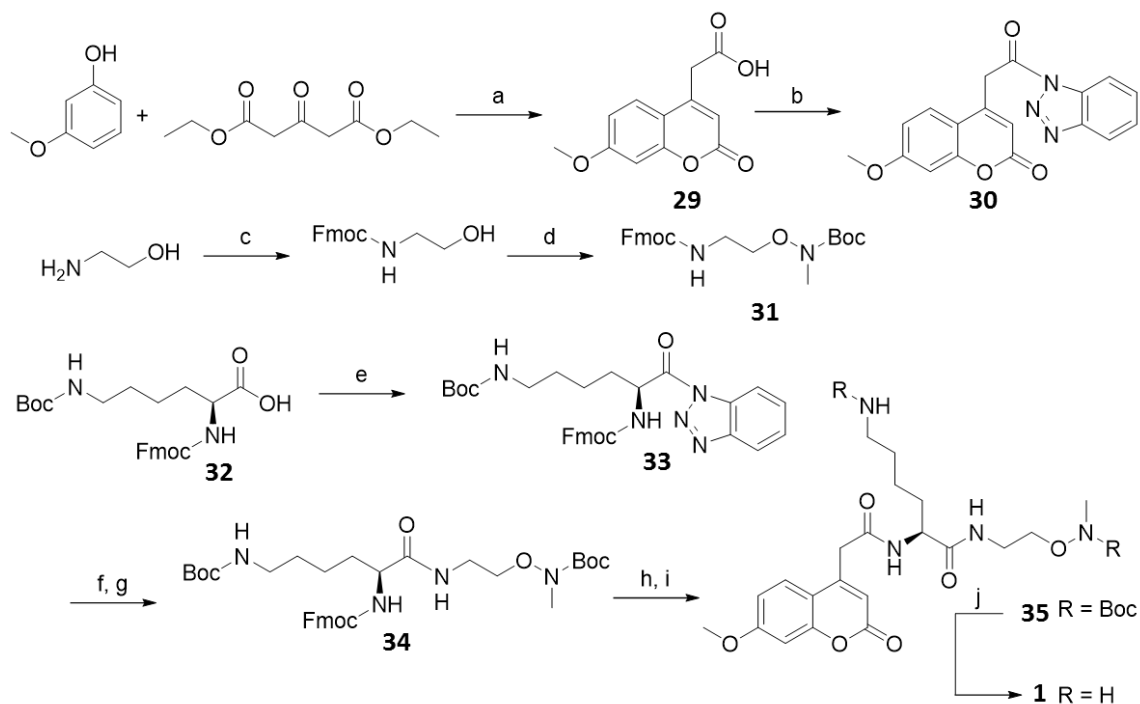

**Figure S1: Multifunctional Linker Synthesis.**

a) H<sub>2</sub>SO<sub>4</sub>/H<sub>2</sub>O (7:3 v/v); b) SOCl<sub>2</sub>, benzotriazole; c) Fmoc-Cl, Py; d) DIAD, PPh<sub>3</sub>, N-methyl-N-boc-hydroxylamine; e) SOCl<sub>2</sub>, benzotriazole; f) Piperidine/DMF, **31** g) Py, **33**; h) Piperidine/DMF, **34**; i) Py, **30**; j) 4M HCl in Dioxane.



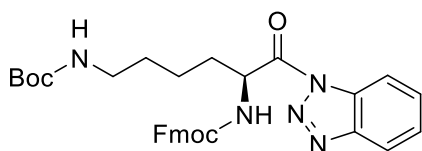

***N*<sup>α</sup>-Fmoc-*N*<sup>ε</sup>-Boc-L-lysine-(1Hbenzo[1,2,3]triazol-1-yl) (33)**

Thionyl chloride (0.58 mL, 8 mmol) and benzotriazole (2.54 g, 21.4 mmol) were dissolved in DCM (100 mL). The solution was cooled in an ice bath (0 °C) followed by addition of **32** (2.5 g, 5.85 mmol). Within minutes benzotriazole HCl was formed as a white precipitant. The solution was vigorously stirred for 2 h, after which the solvent was evaporated to yield a light yellow solid that was recrystallized from EtOAc and hexane to yield a white amorphous solid (3.07 g, 92%). <sup>1</sup>H (500 MHz, CDCl<sub>3</sub>) δ ppm: 8.27 (d, *J* = 8.6 Hz, 1H, CH Ar), 8.15 (d, *J* = 8.3 Hz, 1H, CH Ar), 7.82 - 7.47 (m, 6H, Ar), 7.47 - 7.27 (m, 4H, Ar), 5.80 (br. s, 1H, CH(a)), 4.43 (p, 2H, CH<sub>2</sub> Fmoc), 4.25 (t, *J* = 7.0 Hz, 1H, CH Fmoc), 3.12 (br. s, 1H, CH<sub>2</sub>(e)), 2.13 (br. m, 1H, CH<sub>2</sub>(b)), 2.00 (br. s, 1H, CH<sub>2</sub>'(e)), 1.68 - 1.37 (m, 13H, CH<sub>2</sub>(d), CH<sub>2</sub>(c), 3 x CH<sub>3</sub> boc). <sup>13</sup>C NMR-HSQC (125 MHz, CDCl<sub>3</sub>) δ ppm: 130.96, 127.88, 127.29, 126.77, 125.34, 125.33, 120.58, 120.15, 114.72, 67.42, 54.79, 47.28, 39.87, 32.47, 29.73, 28.51, 22.67. MALDI-MS *m/z* calcd for C<sub>32</sub>H<sub>35</sub>N<sub>5</sub>O<sub>5</sub>Na (M + Na)<sup>+</sup> = 592.2536, found 592.2409.

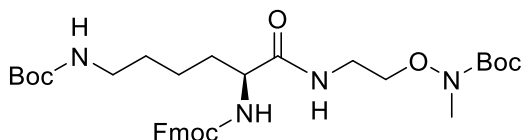

***N*<sup>α</sup>-Fmoc-*N*<sup>ε</sup>-Boc-L-lysine-(N-methyl(2-(N-Boc-aminooxy)ethyl) (34)**

Previously described (1) compound **31** (10 g, 2.4 mmol) was dissolved in a 20% piperidine / DMF solution to remove the Fmoc protecting group. When TLC analysis showed completion of the reaction, the mixture was reduced *in vacuo* and the residue loaded onto a silica gel column which was eluted with 5% ethyl acetate / hexane to remove the 9-methylidene-9H-fluorene by-product. The deprotected amine was eluted with 100% acetone, and fractions containing the compound were concentrated under reduced pressure. The residue was redissolved in DCM (200 mL) and pyridine (3.9 mL, 4.8 mmol). To this mixture, compound **33** (13.67 g, 2.4 mmol) dissolved in DCM (40 mL) was added dropwise over 30 min. The reaction mixture was stirred for 2 h, after which the solvent was removed under reduced pressure. The residue was redissolved in EtOAc (500 mL), washed with saturated ammonium chloride (3 x 100 mL) and the organic phase was dried (MgSO<sub>4</sub>), filtered and the filtrate was concentrated *in vacuo*. The residue was purified by flash silica gel column chromatography (eluent: 40 → 60% EtOAc / Hexane) to yield **34** as a white solid (7.64 g, 49% over two steps). <sup>1</sup>H (500 MHz, CDCl<sub>3</sub>) δ ppm 7.74 (d, *J* = 7.5 Hz, 2H, CH Fmoc), 7.59 (m, 2H, CH Fmoc), 7.37 (dd, *J* = 7.5 Hz, 2H, CH Fmoc), 7.29 (dd, *J* = 7.5 Hz, 2H, CH Fmoc), 4.35 (m, 2H, CH<sub>2</sub> Fmoc), 4.24 (m, 1H, NHCHC(O)), 4.20 (m, 1H, CH Fmoc), 3.87 (m, 2H, CH<sub>2</sub>O), 3.45 (m, 2H, CH<sub>2</sub>N), 3.10 (m, 2H, Boc-NH-CH<sub>2</sub>), 3.06 (s, 3H, N-CH<sub>3</sub>), 1.87 (dq, *J* = 13.9, 6.2, 5.6 Hz, 1H, NH-CH<sub>2</sub>CH<sub>b</sub>-CH<sub>2</sub>), 1.70 (dq, 13.9, 6.2, 5.6 Hz, 1H, NH-CH<sub>a</sub>CH<sub>b</sub>-CH<sub>2</sub>), 1.51 (m, 2H, CH-CH<sub>2</sub>-CH<sub>2</sub>), 1.45 (s, 9H, 3 x CH<sub>3</sub>), 1.41 (s, 9H, 3 x CH<sub>3</sub>), 1.36 (m, 2H, Boc-NH-CH<sub>2</sub>-CH<sub>2</sub>), <sup>13</sup>C NMR-HSQC (125 MHz, CDCl<sub>3</sub>) δ ppm 119.92, 125.13, 127.61, 126.99, 67.00, 54.77, 47.19, 73.00, 37.81, 40.14, 37.01, 32.78, 29.54, 28.31, 28.40, 28.44, 22.46. MALDI-MS *m/z* calcd for C<sub>34</sub>H<sub>48</sub>N<sub>4</sub>O<sub>8</sub>Na (M+Na)<sup>+</sup> = 633.3370; found 633.4843.

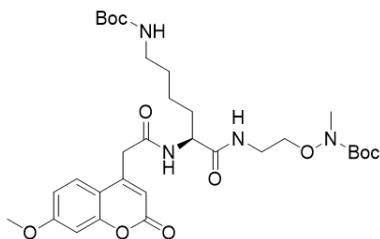

***N<sup>a</sup>-((7-methoxy-2-oxo-2H-chromen-4-yl)acetamido)-N<sup>e</sup>-Boc-L-lysine-(N-methyl(2-(N-Boc-aminooxy)ethyl)) (35)***

Compound **34** (7.64 g, 11.9 mmol) was dissolved in DMF (24 mL) to which piperidine (6 mL, 59.6 mmol) was added for removal of the Fmoc protecting group. The solution was stirred at room temperature for 2 h which resulted in a change of color from light to dark brown. The solvent was removed *in vacuo* and the residue redissolved in a minimal amount of EtOAc : hexane (1 : 4). The solution was loaded onto a small silica column and eluted with several column volumes of EtOAc : hexane (1 : 4) to remove 9-methylidene-9H-fluorene by-product. Deprotected **34** was eluted off the silica column using 100% acetone and the solvent was removed under reduced pressure to give a brown syrup. Previously reported coumarin-benzotriazole (2) **30** (4.39 g, 13.09 mmol) was added to a solution of **34** dissolved in DCM (130 mL) and pyridine (2.9 mL, 35.7 mmol). The reaction vessel was wrapped in aluminum foil and stirred overnight. The mixture was concentrated under reduced pressure and the resulting solid material was recrystallized from EtOAc / hexane to yield **35** as a rust colored solid (7.56 g, 63% over two steps). <sup>1</sup>H (500 MHz, CDCl<sub>3</sub>) δ ppm 7.59 (d, *J* = 8.8 Hz, 1H, CH coumarin), 6.87 (ddd, *J* = 8.8, 2.5, 0.8 Hz, 1H, CH coumarin), 6.84 (d, *J* = 2.5, 1.0 Hz, 1H, CH coumarin), 6.27 (s, 1H, CH coumarin), 4.50 (q, *J* = 7.4 Hz, 1H, NH-CH-C(O)), 3.88 (s, 3H, OCH<sub>3</sub>), 3.84 (m, 2H, CH<sub>2</sub>-O-N), 3.73 (s, 2H, CH<sub>2</sub>-C(O)NH), 3.44 (q, *J* = 5.2 Hz, 2H, NH-CH<sub>2</sub>), 3.10 (s, 3H, N-CH<sub>3</sub>), 3.04 (m, 2H, CH<sub>2</sub>-CH<sub>2</sub>-NH-Boc), 1.88 (dddd, *J* = 14.1, 7.4, 6.4 Hz, 1H, CH-CH<sub>a</sub>-CH<sub>b</sub>-CH<sub>2</sub>), 1.69 (dddd, *J* = 14.1, 7.4, 6.4 Hz, 1H, CH-CH<sub>a</sub>-CH<sub>b</sub>-CH<sub>2</sub>), 1.49 (s, 9H, 3 x CH<sub>3</sub>), 1.46 (m, 2H, CH<sub>2</sub>-CH<sub>2</sub>-NH-Boc), 1.44 (s, 9H, 3 x CH<sub>3</sub>), 1.27 (m, 2H, CH-CH<sub>2</sub>-CH<sub>2</sub>). <sup>13</sup>C NMR-HSQC (125 MHz, CDCl<sub>3</sub>) δ ppm 125.91, 112.91, 101.14, 113.64, 53.22, 55.81, 72.84, 40.86, 37.72, 37.02, 40.05, 32.39, 28.35, 29.57, 28.53, 22.22. MALDI-MS *m/z* calcd for C<sub>31</sub>H<sub>46</sub>N<sub>4</sub>O<sub>10</sub>Na (M+Na)<sup>+</sup> = 657.3112; found 657.1883.

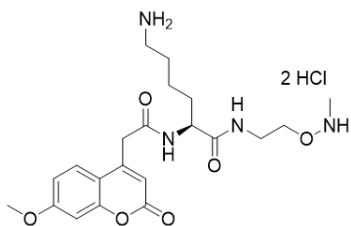

***N<sup>a</sup>-((7-methoxy-2-oxo-2H-chromen-4-yl)acetamido)-L-lysine-(N-methyl-(aminooxy)ethyl) diammonium chloride (1)***

Compound **35** (4.77 g, 7.5 mmol) was dissolved in of 4 M HCl in dioxane (80 mL) and within 1 h a significant amount of solid had precipitated. The light tan solid was filtered, washed with several portions of diethyl ether, and dried *in vacuo* to yield **1** (3.72 g, 98% yield). <sup>1</sup>H (600 MHz, D<sub>2</sub>O) δ ppm 7.46 (d, *J* = 8.9 Hz, 1H, CH-coumarin), 6.85 (dd, *J* = 8.9, 2.6, 1H, CH-coumarin), 6.79 (d, *J* = 2.5 Hz, 1H, CH-coumarin), 6.13 (s, 1H, CH-coumarin), 4.12 (dd, *J* 8.9, 5.8 Hz, 1H, NH-CH-C(O)), 4.02 – 3.96 (m, 2H, CH<sub>2</sub>-CH<sub>2</sub>-O), 3.75 (m, 5H, O-CH<sub>3</sub>, NH<sub>2</sub>-CH<sub>2</sub>), 3.60 (s, 2H, CH<sub>2</sub>-C(O)), 3.44 – 3.30 (m, 2H, NH-CH<sub>2</sub>-CH<sub>2</sub>), 2.82 (dq, *J* = 8.4, 5.7, 4.2 Hz, 2H, CH<sub>2</sub>-NH<sub>3</sub><sup>+</sup>), 2.75 (s, 3H, N-CH<sub>3</sub>), 1.74 – 1.59 (m, 2H, CH-CH<sub>a</sub>-CH<sub>b</sub>-CH<sub>2</sub>), 1.57 – 1.49 (m, 2H, CH<sub>2</sub>-CH<sub>2</sub>-NH<sub>3</sub><sup>+</sup>), 1.36 – 1.19 (m, 2H, CH<sub>2</sub>-CH<sub>2</sub>-CH<sub>2</sub>). <sup>13</sup>C NMR-HSQC (150 MHz, D<sub>2</sub>O) δ ppm 125.90, 113.05, 100.99, 112.32, 54.09, 72.21, 38.31, 55.88, 67.17, 37.13, 39.13, 34.94, 30.27, 26.09, 21.88. MALDI-MS *m/z* calcd for C<sub>21</sub>H<sub>30</sub>N<sub>4</sub>O<sub>6</sub> (M+Na)<sup>+</sup> = 457.2063; found 457.1454.

### 1.c. Installation of Anomeric Linker

Lactose (2.14 g, 6.25 mmol) and anomeric linker **1** (632 mg, 1.24 mmol) were dissolved in sodium acetate buffer (50 mL, 0.25 M, pH = 4.2) and allowed to mix overnight at 37 °C. The reaction was monitored by reverse phase TLC using an elution system of 40% ACN / H<sub>2</sub>O, with 1 drop of acetic acid. When no further linker was detected, the solvent was removed by reduced pressure. The crude product was purified by preparatory HPLC eluting with the following conditions:

A = acetonitrile, B = 50 mM ammonium bicarbonate

| Time (mins) | %A  | %B  | Flow Rate (mL / min) |
|-------------|-----|-----|----------------------|
| 0           | 0   | 100 | 30                   |
| 20          | 100 | 0   | 30                   |

Fractions containing the product were confirmed by MALDI-MS, pooled, and the solvent was removed using lyophilization to yield a white fluffy powder **3** (423 mg, 42% yield).

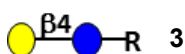

<sup>1</sup>H (500 MHz, D<sub>2</sub>O):  $\delta$  (ppm)

|            | H1                                 | H2   | H3   | H4   | H5   | H6         |
|------------|------------------------------------|------|------|------|------|------------|
| <b>Glc</b> | 4.03<br>(d, <i>J</i> = 9.2 Hz, 1H) | 3.39 | 3.50 | 3.69 | 3.28 | 3.84, 3.69 |
| <b>Gal</b> | 4.32<br>(d, <i>J</i> = 7.8 Hz, 1H) | 3.41 | 3.52 | 3.79 | 3.54 | 3.63       |

#### Linker

|                           |                                          |
|---------------------------|------------------------------------------|
| <b>N-CH<sub>3</sub></b>   | 2.57                                     |
| <b>N-O-CH<sub>2</sub></b> | 3.70                                     |
| <b>CH<sub>2</sub>-NH</b>  | 3.28                                     |
| <b>C(O)-CH-NH</b>         | 4.18<br>(dd, <i>J</i> = 8.5, 6.0 Hz, 1H) |
| <b>A</b>                  | 1.71<br>1.65                             |
| <b>B</b>                  | 1.26                                     |
| <b>C</b>                  | 1.48                                     |
| <b>D</b>                  | 2.71                                     |
| <b>E</b>                  | 3.81                                     |
| <b>F</b>                  | 7.54                                     |
| <b>G</b>                  | 6.92                                     |
| <b>H</b>                  | 6.92                                     |
| <b>I</b>                  | 6.21                                     |
| <b>O-CH<sub>3</sub></b>   | 3.80                                     |

<sup>13</sup>C from HSQC (125 MHz, D<sub>2</sub>O):  $\delta$  (ppm) 22.05, 26.83, 30.36, 37.34, 38.18, 38.18, 39.01, 39.14, 53.82, 55.00, 55.14, 55.82, 56.63, 60.05, 60.06, 60.89, 68.42, 69.42, 70.65, 70.81, 72.40, 75.25, 75.52, 76.20, 78.04, 92.90, 101.09, 102.78, 112.48, 113.09, 125.99.

MALDI TOF-MS *m/z* calcd for C<sub>33</sub>H<sub>50</sub>N<sub>4</sub>O<sub>16</sub>Na (M + Na)<sup>+</sup> 781.3120, found 781.4410.

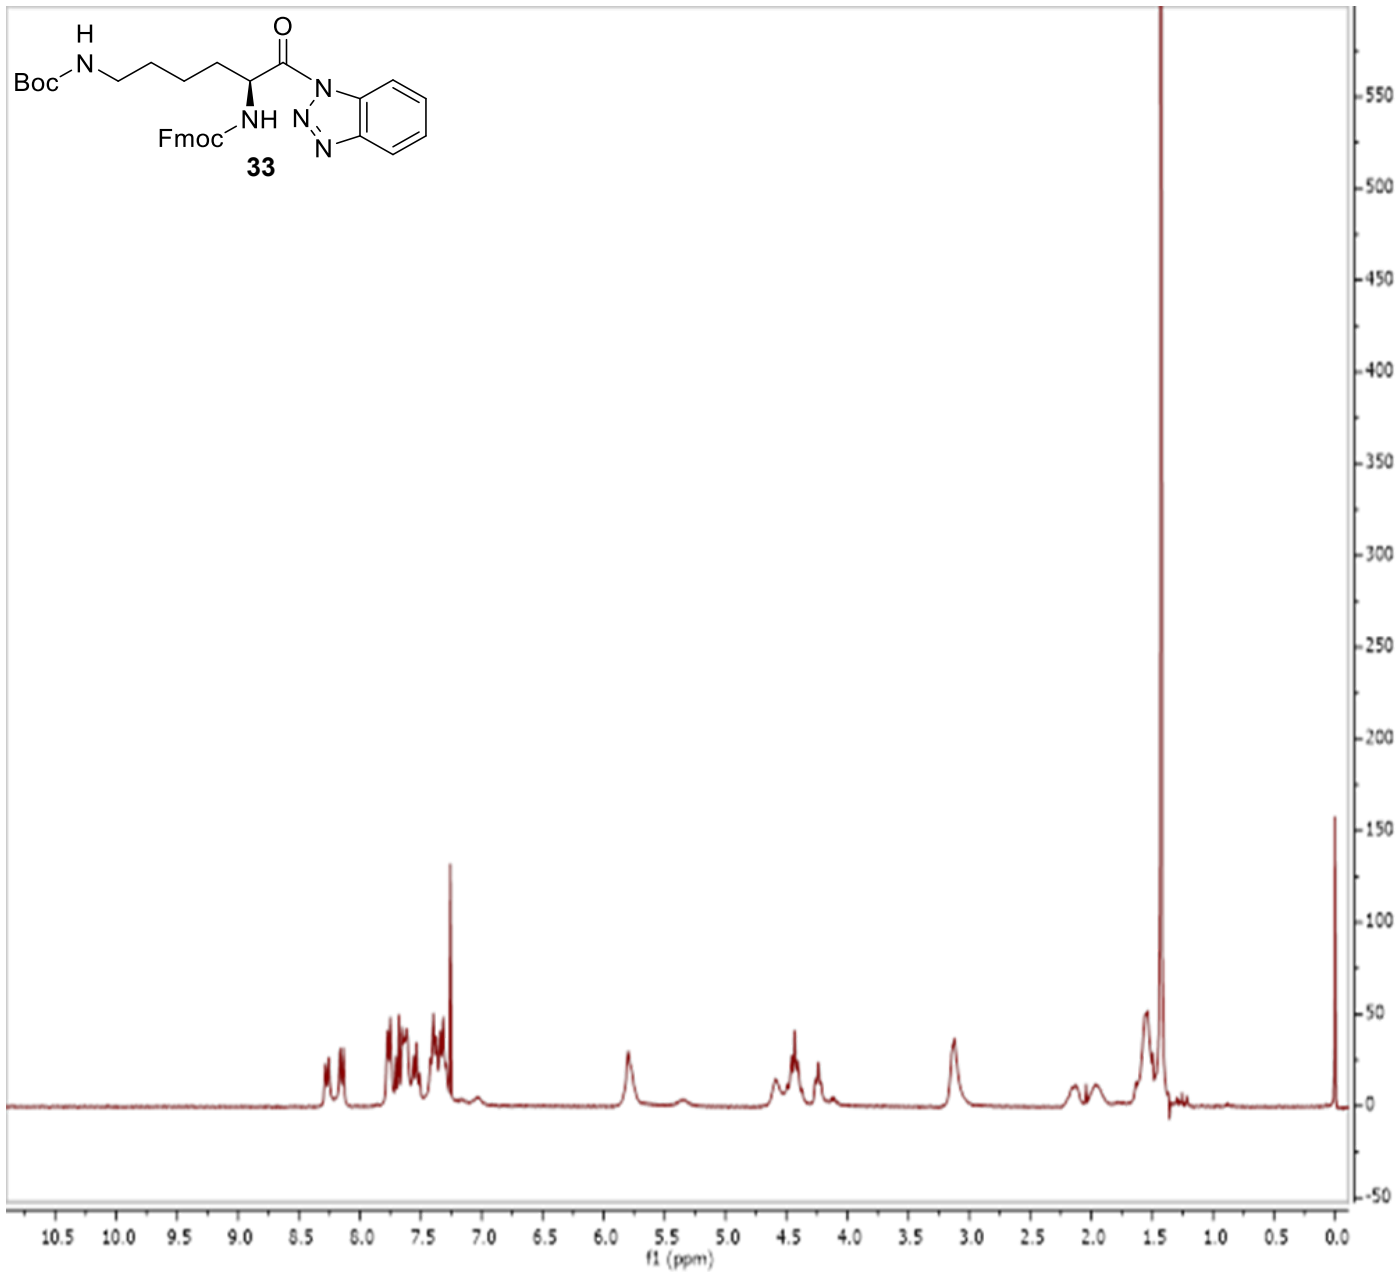

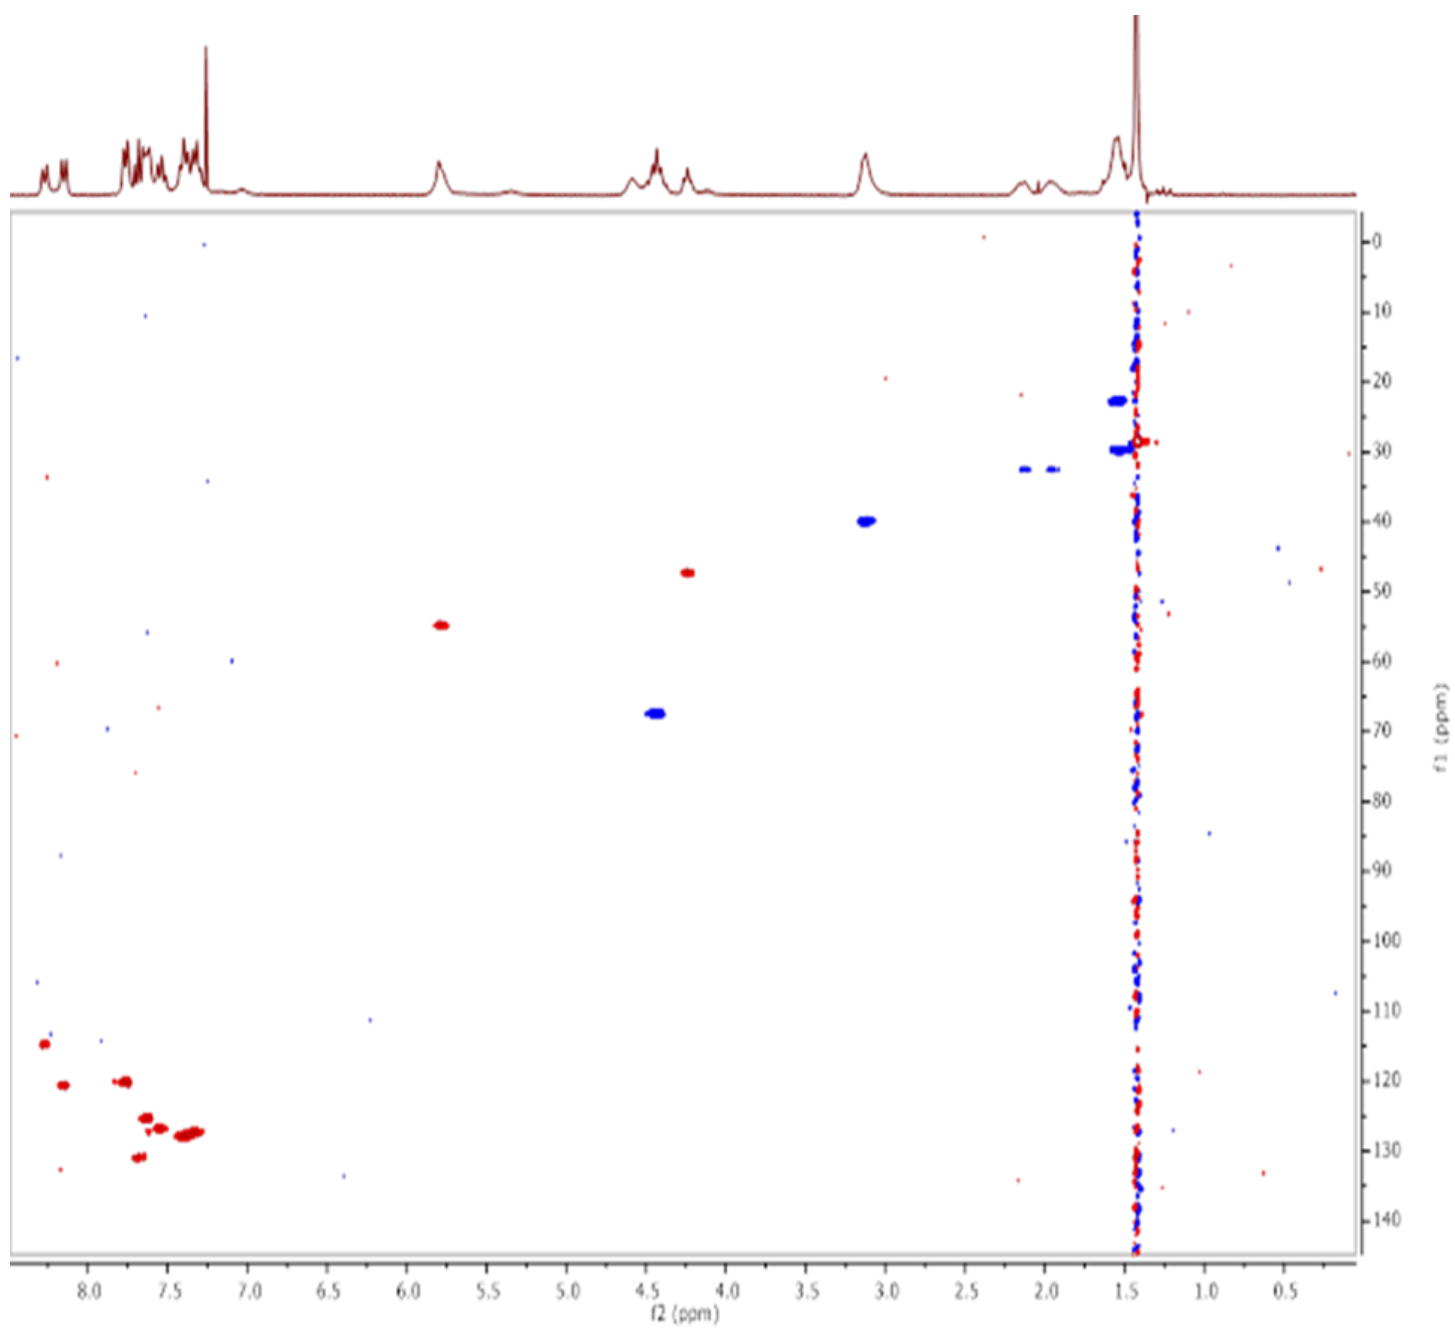

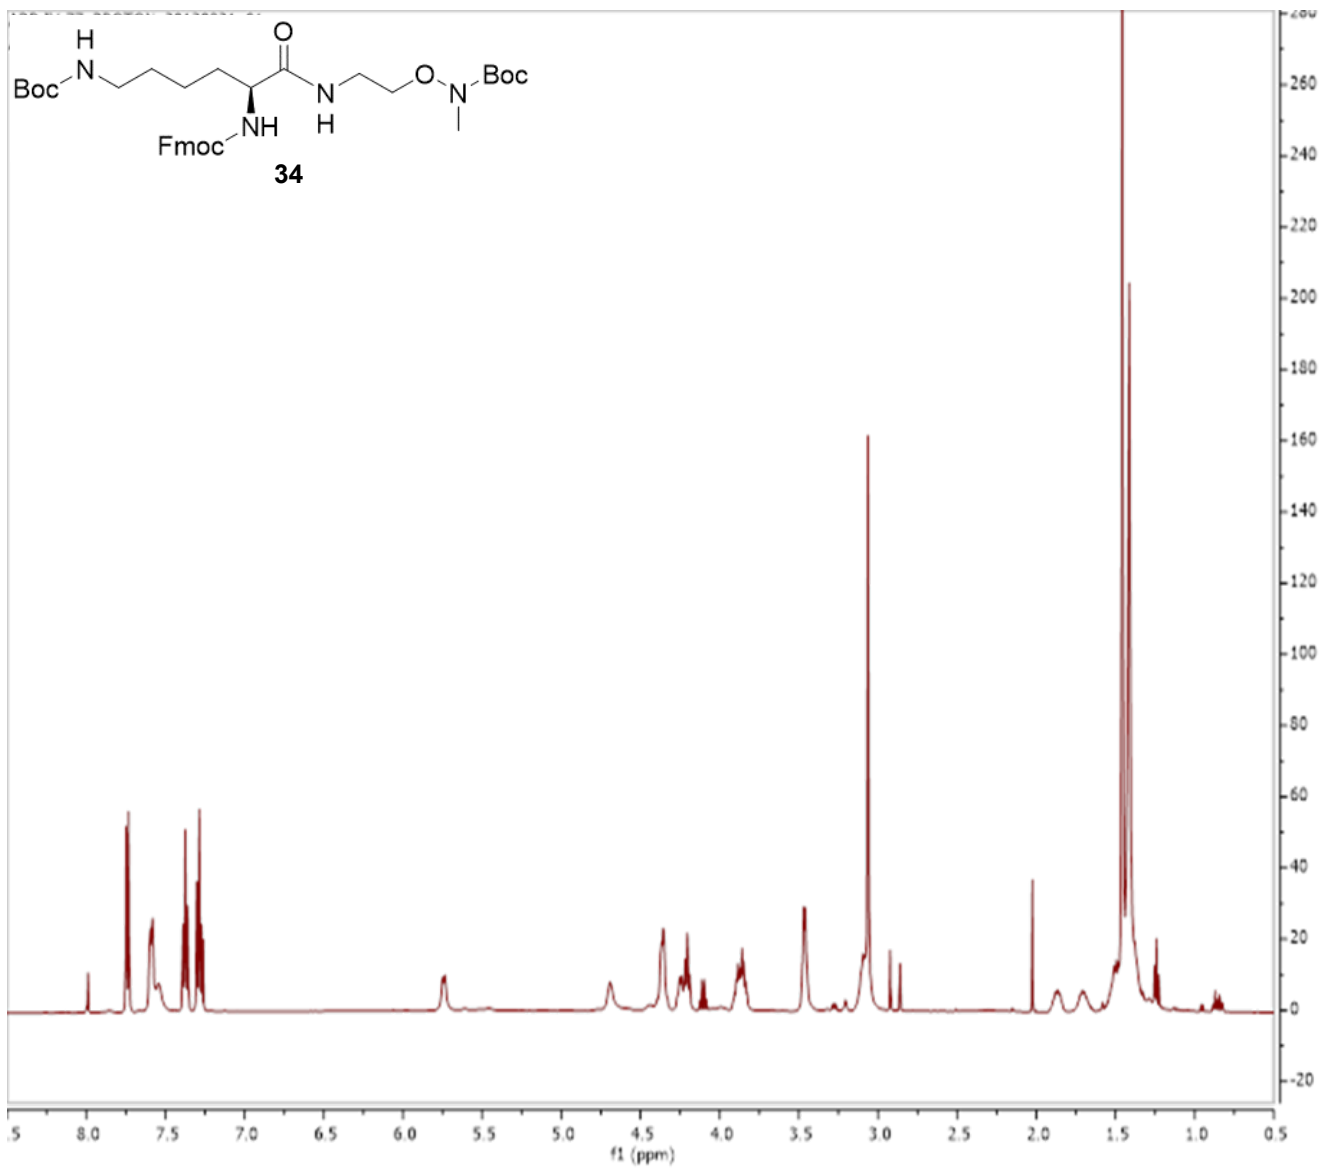

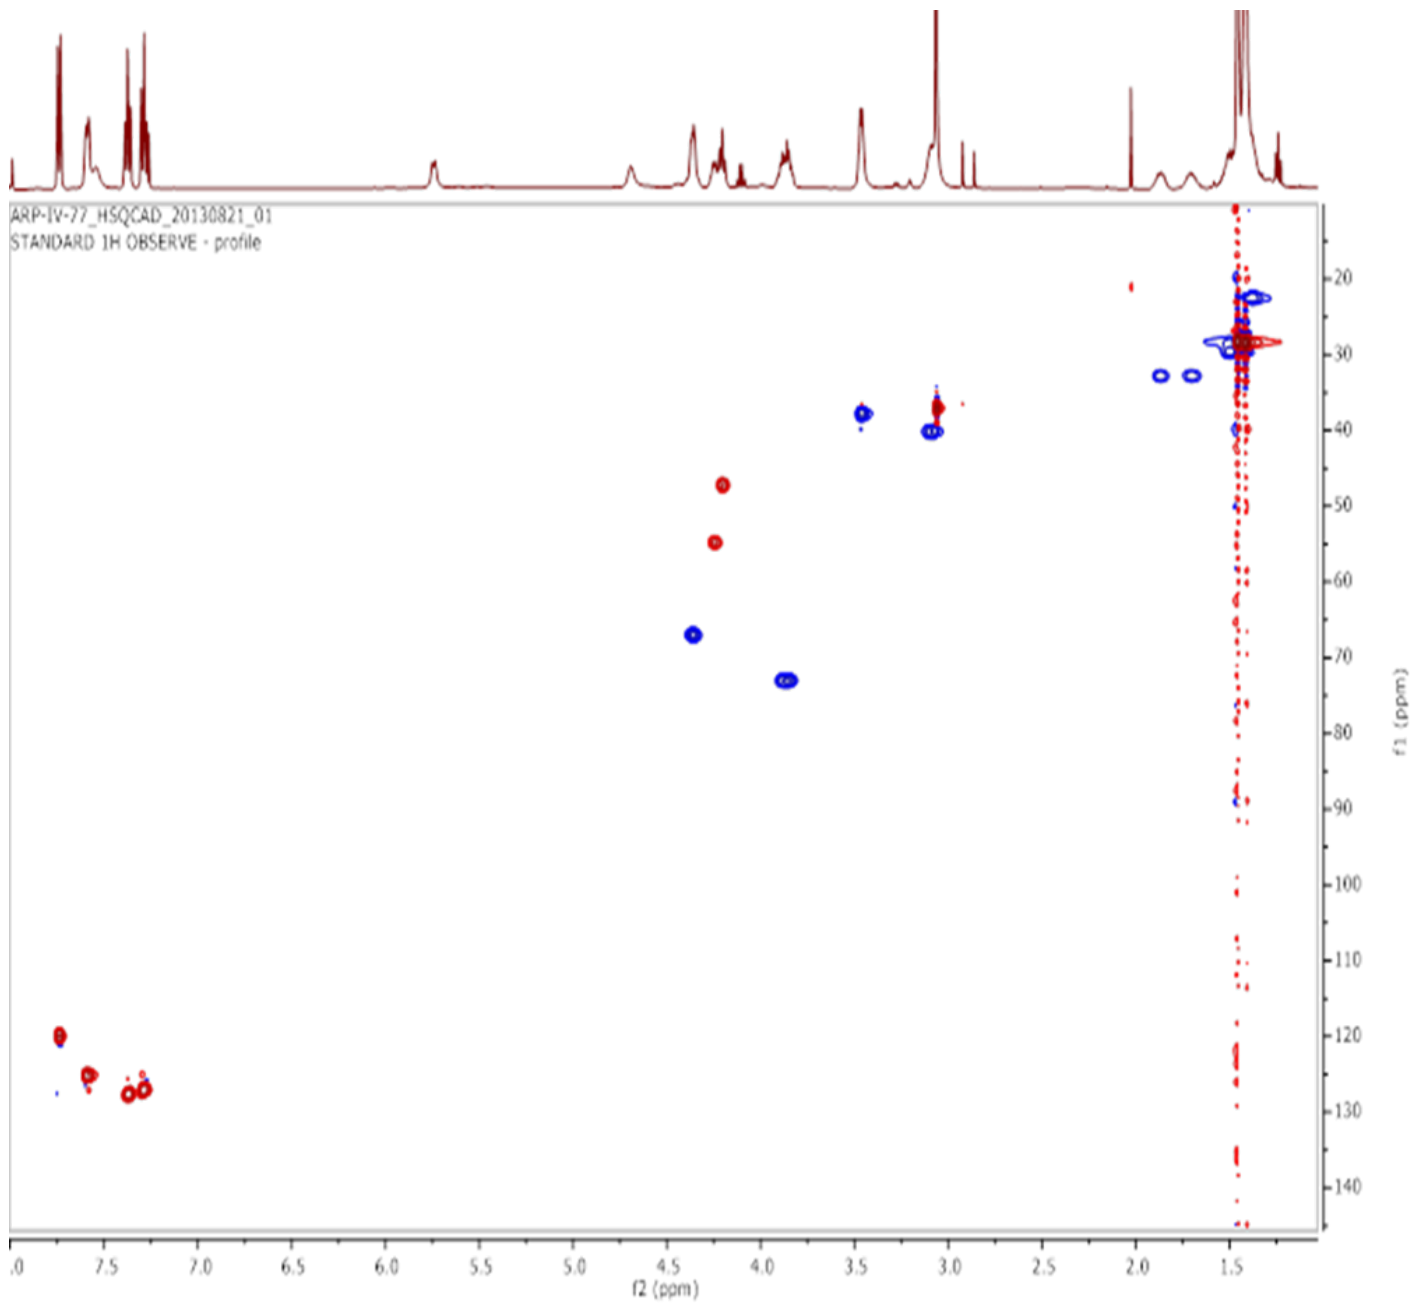

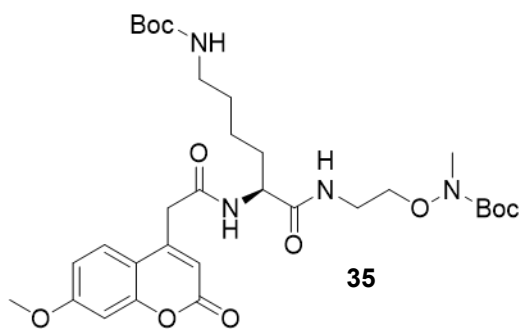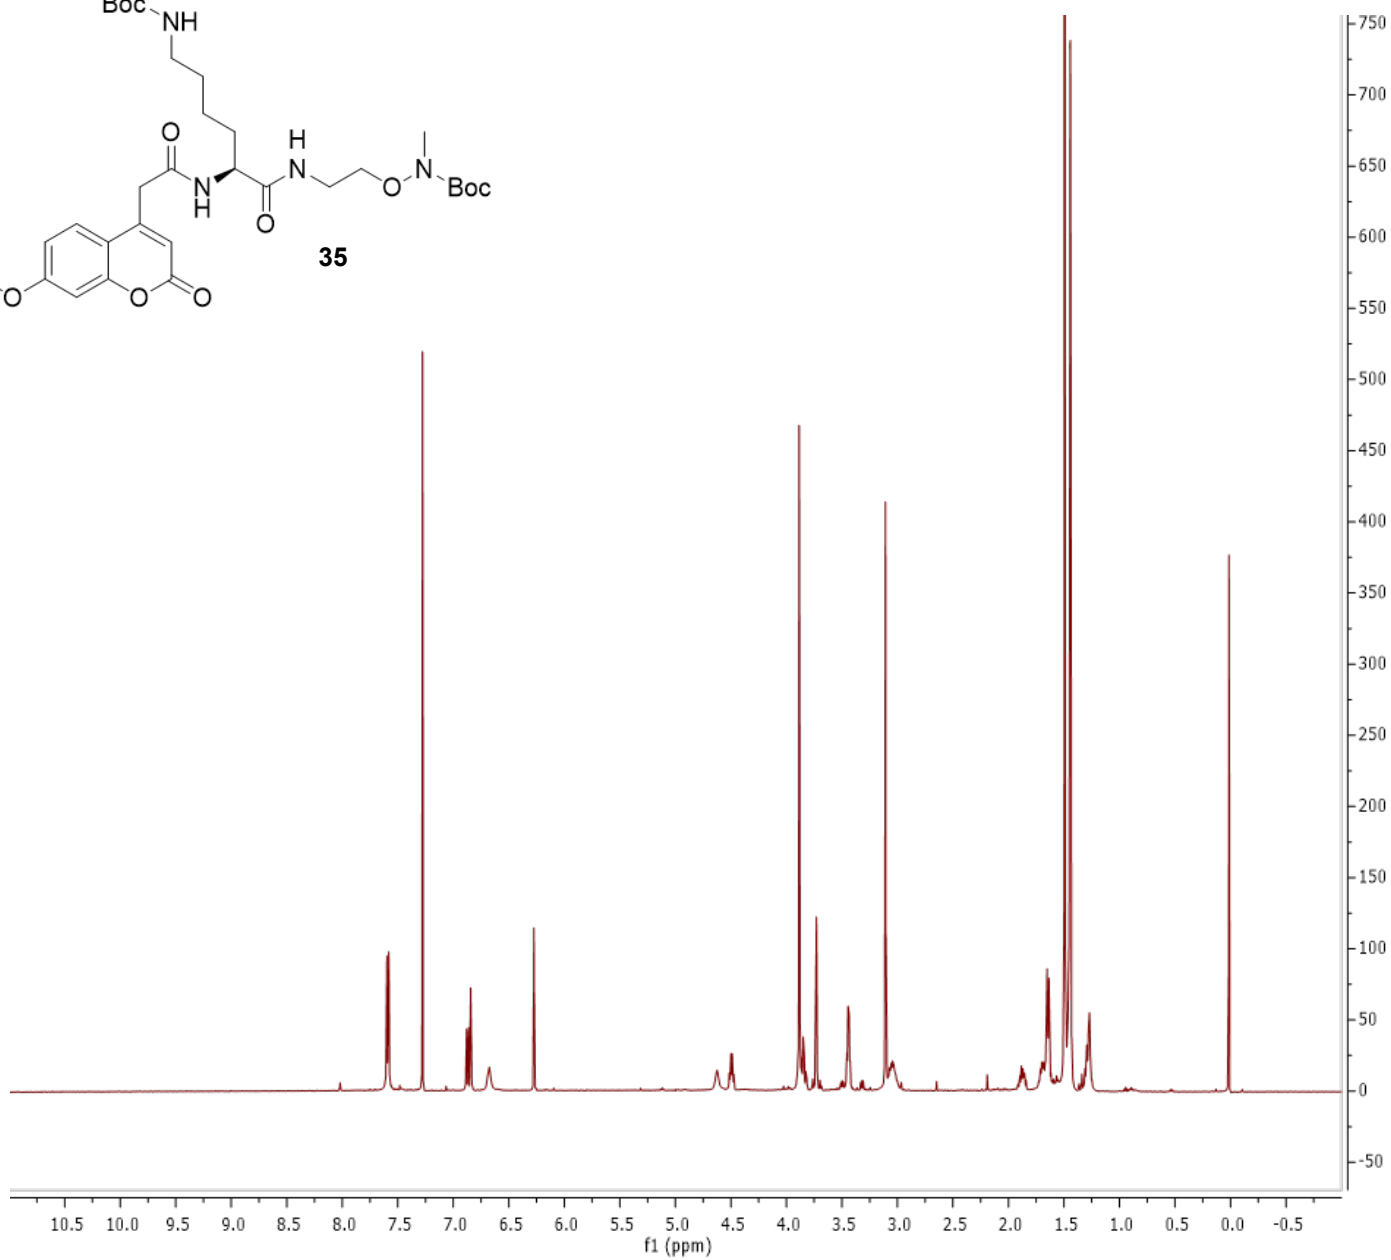



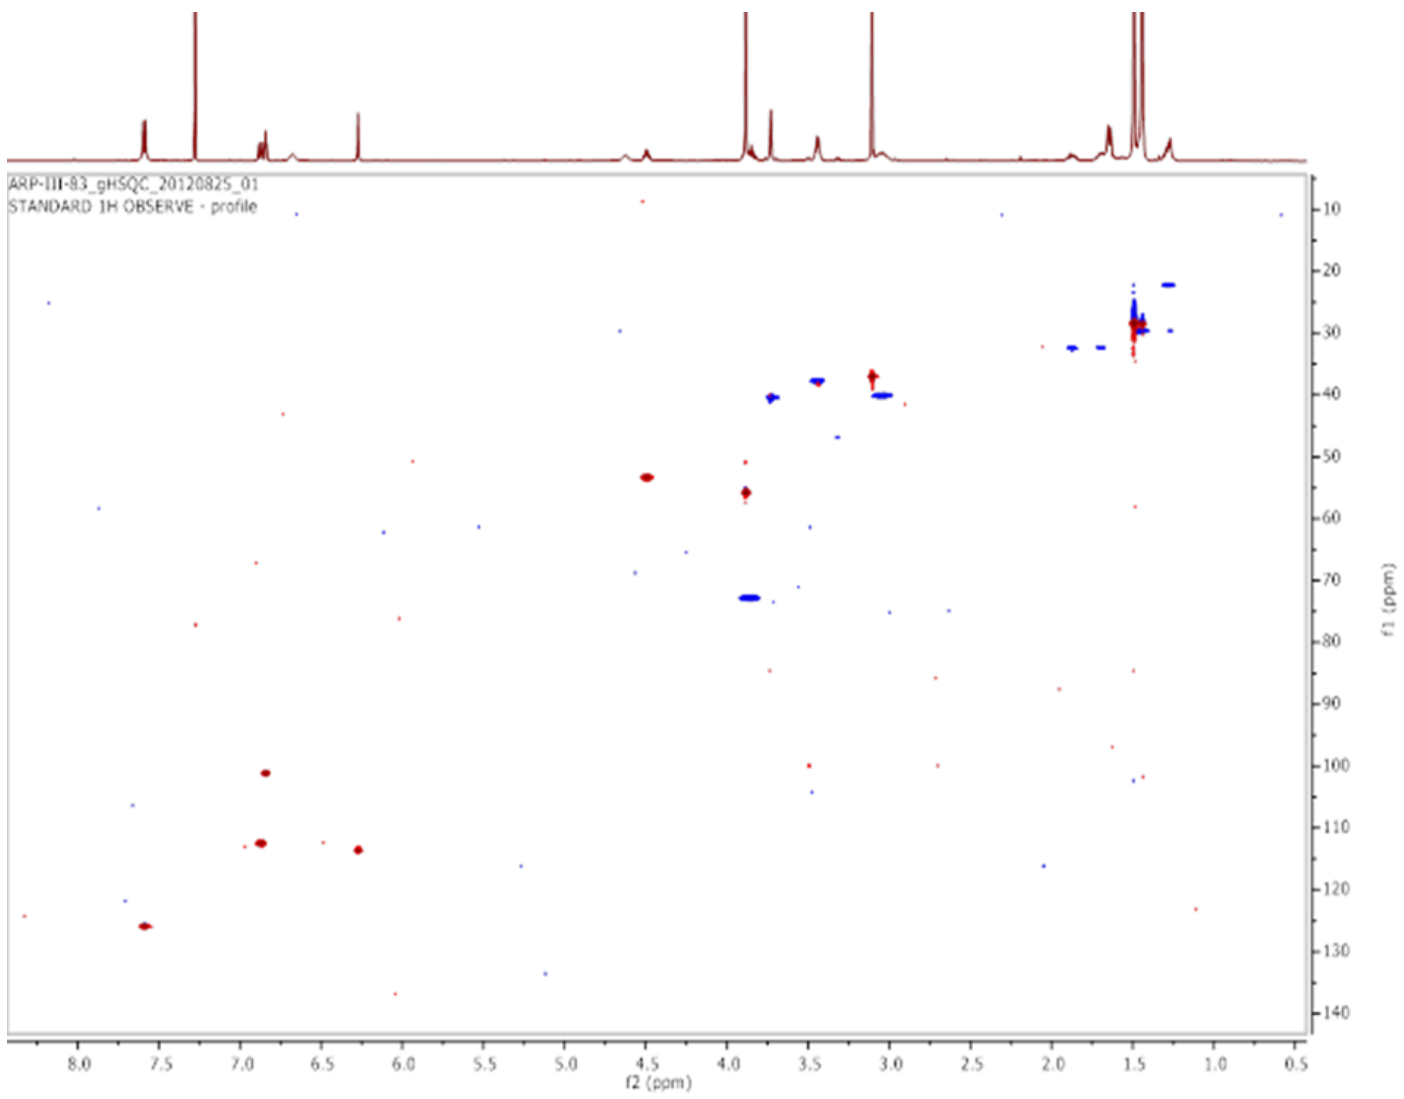

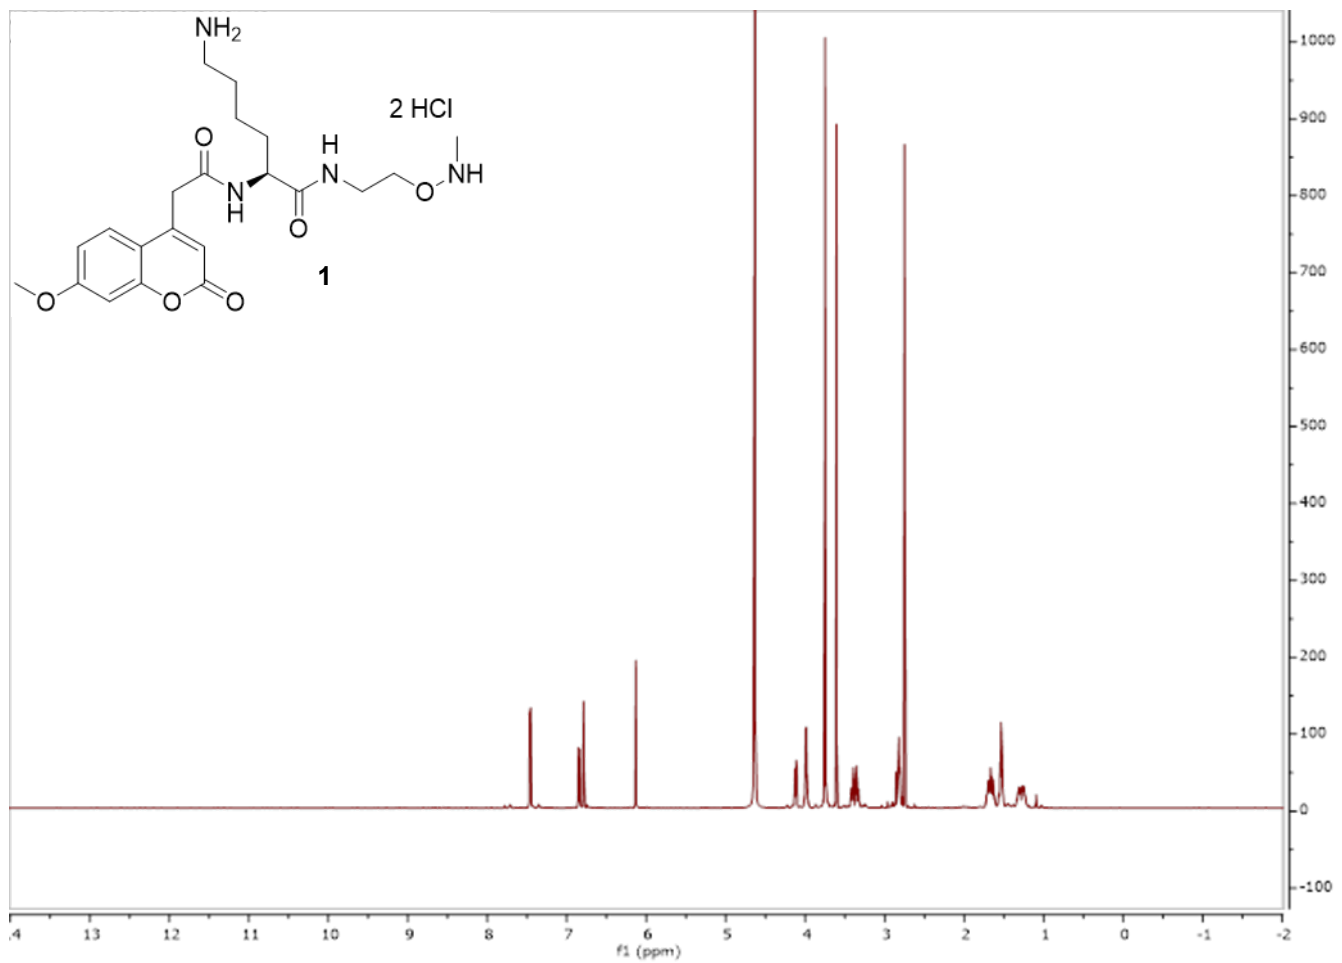

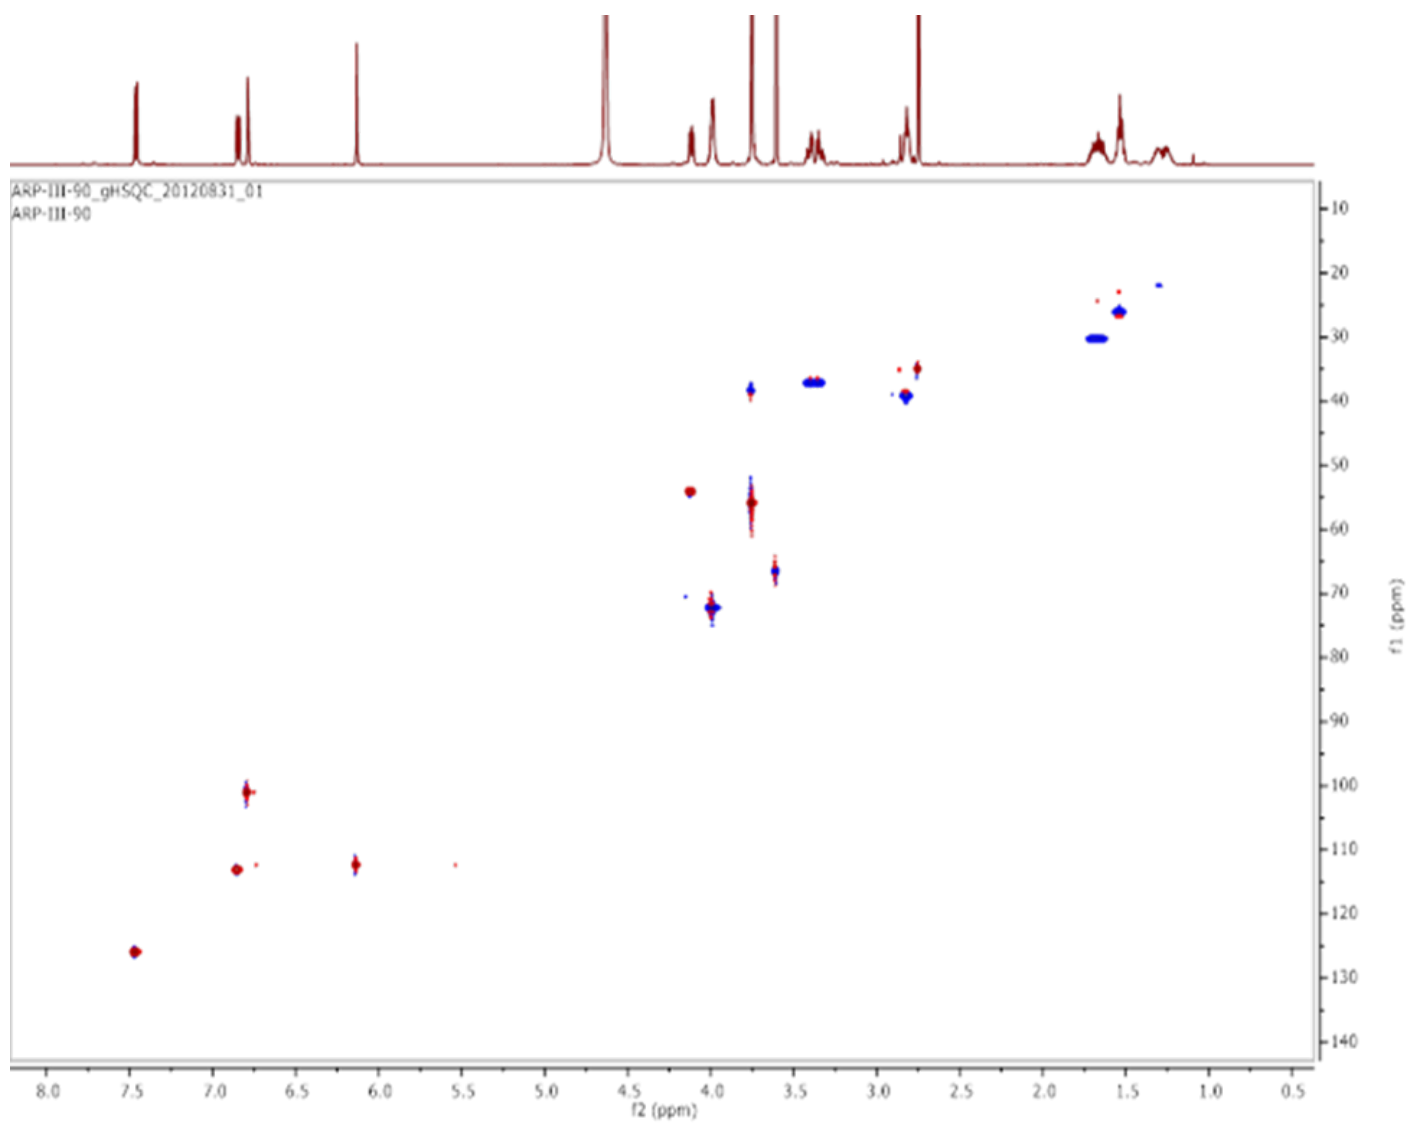

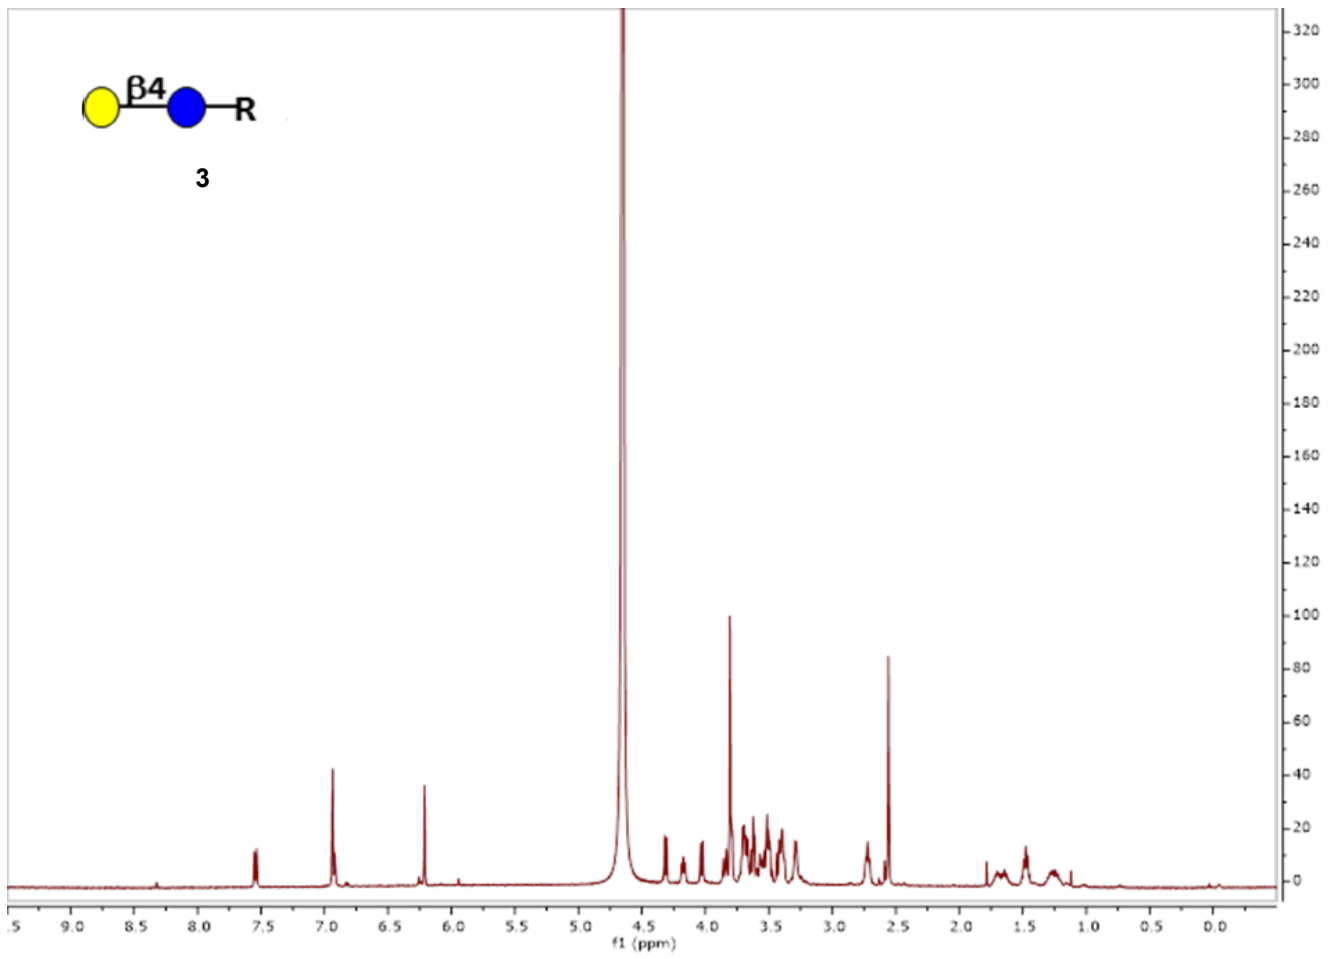

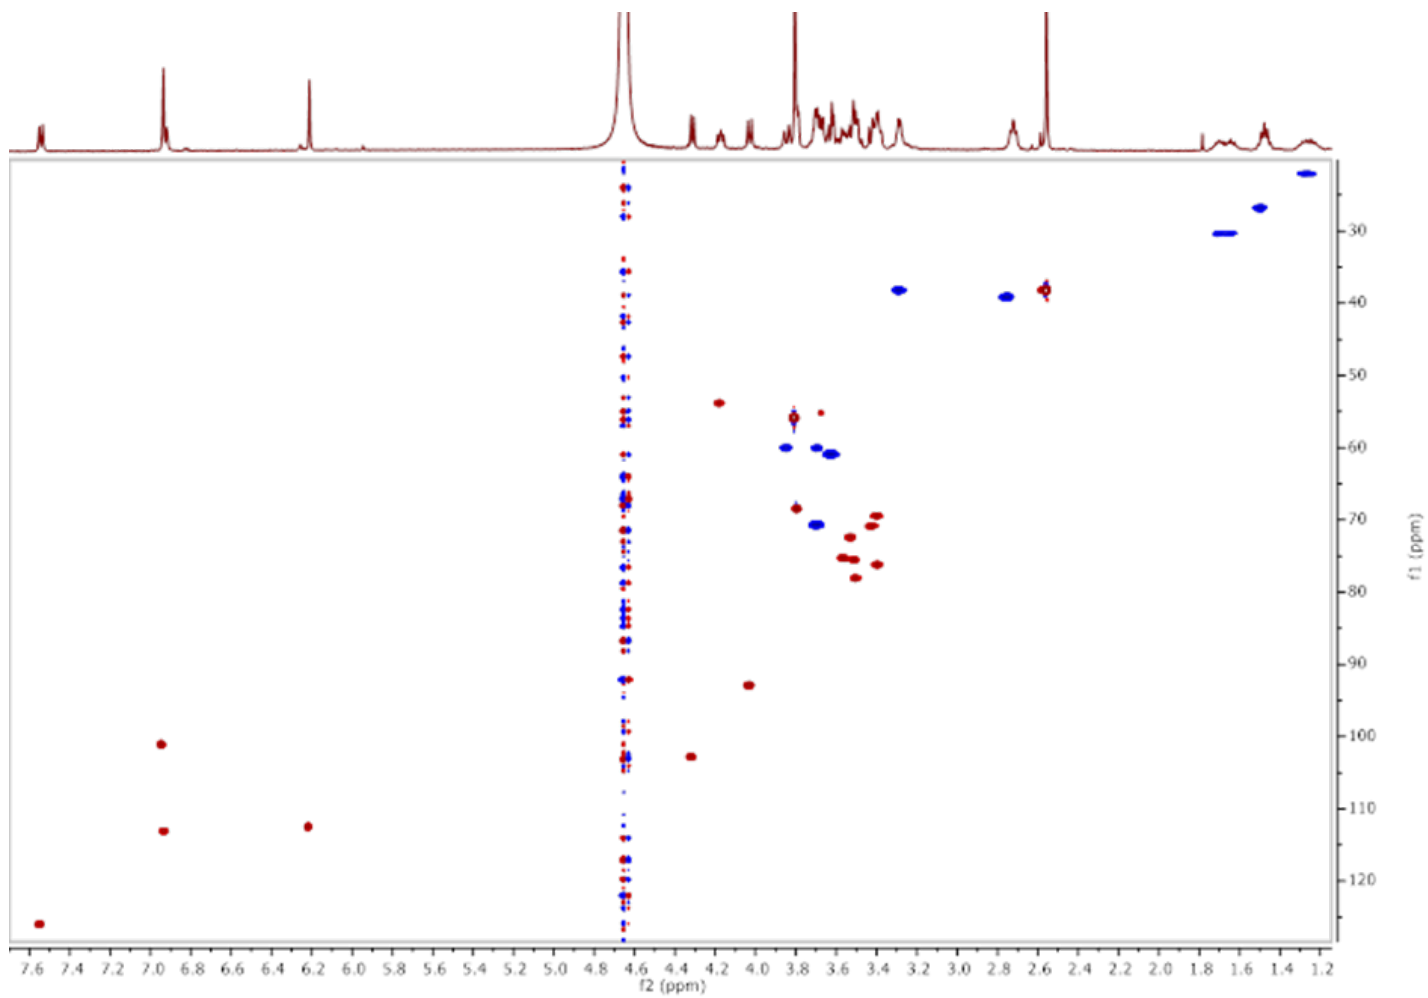

## 2. Enzymatic Synthesis

### 2.a. Materials and Methods

<sup>1</sup>H spectra were recorded on a 500 MHz Varian Inova, 600 MHz Agilent DD2, 800 MHz Agilent DD2, or an Agilent 900 MHz DD2 spectrometer with a triple resonance (HCN) cryogenically cooled probe spectrometer. Chemical shifts are reported in parts per million (ppm) relative to H1 of reducing glucose which was set to  $\delta$  4.00 as the internal standard. NMR data is represented as follows: Chemical shift, multiplicity (s = singlet, d = doublet, t = triplet, dd = doublet of doublets, m = multiplet and / or multiple resonances, br. = broad signal), *J* coupling, integration, and peak identity. NMR signals were assigned on the basis of <sup>1</sup>H NMR, gCOSY, gHSQC, zTOCSY, and NOESY experiments. Enzymatic reactions were monitored by mass spectrometry recorded on an Applied Biosystems SCIEX MALDI TOF / TOF 5800 using 2,5-dihydroxybenzoic acid (DHB) as a matrix or a Shimadzu 20AD UFLC LCMS-IT-TOF. Reverse phase (RP) TLC was performed on glass plates coated with HPTLC Silica gel 60 RP-18 WF<sub>254S</sub> (EMD Chemicals, Inc.) and developed with 20 - 40% acetonitrile in H<sub>2</sub>O. Visualization of TLC plates was accomplished by spraying with 10% sulfuric acid in ethanol, Hanessian's Stain, or ninhydrin followed by charring at ~150 °C. Reagents were purchased from Sigma-Aldrich and used without further purification. HPLC purification of compounds was performed on an Agilent Technologies 1200 Series HPLC equipped with a Halo® RP-Amide 4.6 x 100 mm, 2.7  $\mu$ m column. HPLC grade acetonitrile and water were purchased from Fischer. Neutral and sialylated samples were eluted in a 50 mM solution of ammonium bicarbonate with a linear gradient of 0 - 50%, or 0 - 25% acetonitrile over 20 min, respectively at 1 mL/min. Spectra were monitored at a wavelength of 324 nm using an Agilent 1200 series diode array with a multiple wavelength detector. GalT1 from bovine milk was purchased from Sigma. Sialidase from *Arthrobacter ureafaciens* was purchased from Roche and 1,2- $\alpha$ -L-fucosidase (microbial) was purchased from Megazyme.

### 2.b. Human Glycosyl Transferase Expression

The catalytic domains of human glycosyl transferases (as shown in Table S1 below) was expressed as soluble, secreted fusion proteins by transient transfection of HEK293 suspension cultures (3). The coding regions were amplified from Mammalian Gene Collection clones using primers that appended a tobacco etch virus (TEV) protease cleavage site (4) to the NH<sub>2</sub>-terminal end of the coding region and attL1 and attL2 Gateway adaptor sites to the 5' and 3' terminal ends of the amplicon products. The amplicons were recombined via BP clonase reaction into the pDONR221 vector and the DNA sequences were confirmed. The pDONR221 clone was then recombined via LR clonase reaction into a custom Gateway adapted version of the pGen2 mammalian expression vector (3, 5) to assemble a recombinant coding region comprised of a 25 amino acid NH<sub>2</sub>-terminal signal sequence from the *T. cruzi* lysosomal  $\alpha$ -mannosidase (6) followed by an 8xHis tag, 17 amino acid AviTag (7), "superfolder" GFP (8), the nine amino acid sequence encoded by attB1 recombination site, followed by the TEV protease cleavage site and the respective glycosyltransferase catalytic domain coding region.

Suspension culture HEK293 cells (Freestyle 293-F cells, Life Technologies, Grand Island, NY) were transfected as previously described (3) and the culture supernatant was subjected to Ni-NTA superflow chromatography (Qiagen, Valencia, CA). Enzyme preparations eluted with 300 mM imidazole were concentrated to ~1 mg mL<sup>-1</sup> using an ultrafiltration pressure cell membrane (Millipore, Billerica, MA) with a 10 kDa molecular weight cutoff.

**Table S1: Enzyme expression details**

| Enzyme            | Amino Acid Residues | Uniprot ID |
|-------------------|---------------------|------------|
| FUT1              | 26 – 365            | P19526     |
| FUT3              | 40 – 361            | P21217     |
| FUT5              | 40 – 374            | Q11128     |
| FUT9              | 39 – 359            | Q9Y231     |
| B3GNT2            | 35 – 397            | Q9NY97     |
| B3GALT5           | 32 – 310            | Q9Y2C3     |
| GCNT2 (Isoform B) | 26 - 400            | Q06430     |
| ST3GAL4           | 41 – 333            | Q11206     |
| ST6GAL1           | 75 – 406            | P15907     |
| ST6GALNAC5        | 50 – 336            | Q9BVH7     |

## 2.c. General Procedures for Enzymatic Synthesis

### General procedure for the installation of $\beta$ 1,3 GlcNAc using B3GNT2

HMO acceptor and UDP-GlcNAc (1.5 eq per GlcNAc added) were dissolved at a final HMO concentration of 10 mM in a HEPES buffered solution (50 mM, pH 7.3) containing KCl (25 mM), MgCl<sub>2</sub> (2 mM) and DTT (1 mM). Calf intestine alkaline phosphatase (CIAP, 10 U  $\mu$ L<sup>-1</sup>) and B3GNT2 (8.3  $\mu$ g per  $\mu$ mol HMO) were added, and the reaction mixture was incubated overnight at 37 °C with gentle shaking. Reaction progress was monitored by MALDI-TOF MS, and if starting material remained after 18 h another portion of B3GNT2 was added until no starting material could be detected. The reaction mixture was centrifuged using a Nanosep® Omega ultrafiltration device (10 kDa MWCO) to remove enzymes and the filtrate was lyophilized. Purification by reverse-phase HPLC (see Section 2.a. Materials and Methods) provided the desired product.

### General procedure for the installation of branching $\beta$ 1,6 GlcNAc using GCNT2

HMO acceptor and UDP-GlcNAc (1.5 eq per GlcNAc added) were dissolved at a final HMO concentration of 10 mM in a MES buffered solution (50 mM, pH 7.0) containing Na<sub>2</sub>EDTA (10 mM). CIAP (10 U  $\mu$ L<sup>-1</sup>) and GCNT2 (7.5  $\mu$ g per  $\mu$ mol HMO) were added, and the reaction mixture was incubated overnight at 37 °C with gentle shaking. Reaction progress was monitored by MALDI-TOF MS, and if starting material remained after 18 h another portion of GCNT2 was added until no starting material could be detected. The reaction mixture was centrifuged using a Nanosep® Omega ultrafiltration device (10 kDa MWCO) to remove enzymes and the filtrate was lyophilized. Purification by reverse-phase HPLC (see Section 2.a.) provided the desired product.

### General procedure for the installation of $\beta$ 1,4 Gal using GalT1 to form Type II LacNAc moieties

HMO acceptor and UDP-Gal (1.5 eq per Gal added) were dissolved at a final HMO concentration of 10 mM in a Tris buffered solution (50 mM, pH 7.3) containing MnCl<sub>2</sub> (10 mM) and BSA (0.1% *wt/wt*). CIAP (10 U  $\mu$ L<sup>-1</sup>) and GalT1 (5  $\mu$ g per  $\mu$ mol HMO) were added, and the reaction mixture was incubated overnight at 37 °C with gentle shaking. Reaction progress was monitored by MALDI-TOF MS, and if starting material remained after 18 h another portion of GalT1 was added until no starting material could be detected. The reaction mixture was centrifuged using a Nanosep® Omega

ultrafiltration device (10 kDa MWCO) to remove enzymes and BSA, and the filtrate was lyophilized. Purification by reverse-phase HPLC (see Section 2.a.) provided the desired product.

#### **General procedure for the installation of $\beta$ 1,3 Gal using B3GALT5 to form Type I LacNAc moieties**

HMO acceptor and UDP-Gal (1.5 eq per Gal added) were dissolved at a final HMO concentration of 10 mM in a sodium cacodylate buffered solution (150 mM, pH 7.5) containing  $\text{MnCl}_2$  (10 mM) and BSA (0.1% *wt/wt*). CIAP ( $10 \text{ U } \mu\text{L}^{-1}$ ) and B3GALT5 (8.2  $\mu\text{g}$  per  $\mu\text{mol}$  HMO) were added, and the reaction mixture was incubated overnight at 37 °C with gentle shaking. Reaction progress was monitored by MALDI-TOF MS, and if starting material remained after 18 h another portion of B3GALT5 was added until no starting material could be detected. The reaction mixture was centrifuged using a Nanosep® Omega ultrafiltration device (10 kDa MWCO) to remove enzymes and BSA, and the filtrate was lyophilized. Purification by reverse-phase HPLC (see Section 2.a.) provided the desired product.

#### **General procedure for the installation of $\alpha$ 1,2 Fuc using FUT1**

HMO acceptor and GDP-Fuc (1.5 eq per Fuc added) were dissolved at a final HMO concentration of 10 mM in a Tris buffered solution (50 mM, pH 7.3) containing  $\text{MnCl}_2$  (10 mM). CIAP ( $10 \text{ U } \mu\text{L}^{-1}$ ) and FUT1 (10  $\mu\text{g}$  per  $\mu\text{mol}$  HMO) were added, and the reaction mixture was incubated overnight at 37 °C with gentle shaking. Reaction progress was monitored by MALDI-TOF MS, and if starting material remained after 18 h another portion of FUT1 was added until no starting material could be detected. The reaction mixture was centrifuged using a Nanosep® Omega ultrafiltration device (10 kDa MWCO) to remove enzymes and the filtrate was lyophilized. Purification by reverse-phase HPLC (see Section 2.a.) provided the desired product.

#### **General procedure for the installation of $\alpha$ 1,3 Fuc using FUT3**

HMO acceptor and GDP-Fuc (1.5 eq per Fuc added) were dissolved at a final HMO concentration of 10 mM in a Tris buffered solution (50 mM, pH 7.3) containing  $\text{MnCl}_2$  (10 mM). CIAP ( $10 \text{ U } \mu\text{L}^{-1}$ ) and FUT3 (10  $\mu\text{g}$  per  $\mu\text{mol}$  HMO) were added, and the reaction mixture was incubated overnight at 37 °C with gentle shaking. Reaction progress was monitored by MALDI-TOF MS, and if starting material remained after 18 h another portion of FUT3 was added until no starting material could be detected. The reaction mixture was centrifuged using a Nanosep® Omega ultrafiltration device (10 kDa MWCO) to remove enzymes and the filtrate was lyophilized. Purification by reverse-phase HPLC (see Section 2.a.) provided the desired product.

#### **General procedure for the installation of $\alpha$ 1,3 Fuc using FUT5**

HMO acceptor and GDP-Fuc (1.5 eq per Fuc added) were dissolved at a final HMO concentration of 10 mM in a Tris buffered solution (50 mM, pH 7.3) containing  $\text{MnCl}_2$  (10 mM). CIAP ( $10 \text{ U } \mu\text{L}^{-1}$ ) and FUT5 (10  $\mu\text{g}$  per  $\mu\text{mol}$  HMO) were added, and the reaction mixture was incubated overnight at 37 °C with gentle shaking. Reaction progress was monitored by MALDI-TOF MS, and if starting material remained after 18 h another portion of FUT5 was added until no starting material could be detected. The reaction mixture was centrifuged using a Nanosep® Omega ultrafiltration device (10 kDa MWCO) to remove enzymes and the filtrate was lyophilized. Purification by reverse-phase HPLC (see Section 2.a.) provided the desired product.



#### **General Procedure for the installation of $\alpha$ 2,3 Neu5Ac using ST3GAL4**

HMO acceptor and CMP-Neu5Ac (1.5 eq per Neu5Ac added) were dissolved at a final HMO concentration of 10 mM in a sodium cacodylate buffered solution (50 mM, pH 7.2) containing BSA (0.1% *wt/wt*). CIAP ( $10 \text{ U } \mu\text{L}^{-1}$ ) and  $\alpha$ 2,3-sialyltransferase 4 (ST3GAL4, 4  $\mu\text{g}$  per  $\mu\text{mol}$  HMO) were added, and the reaction mixture was incubated overnight at 37 °C with gentle shaking. Reaction progress was monitored by MALDI-TOF MS, and if starting material remained after 18 h another portion of ST3GAL4 was added until no starting material could be detected. The reaction mixture was centrifuged using a Nanosep® Omega ultrafiltration device (10 kDa MWCO) to remove enzymes and BSA, and the filtrate was lyophilized. Purification by reverse-phase HPLC (see Section 2.a.) provided the desired product.

#### **General procedure for the installation of terminal $\alpha$ 2,6 Neu5Ac using ST6GAL1**

HMO acceptor and CMP-Neu5Ac (1.5 eq per Neu5Ac added) were dissolved at a final HMO concentration of 10 mM in a sodium cacodylate buffered solution (100 mM, pH 6.5) containing BSA (0.1% *wt/wt*). CIAP ( $10 \text{ U } \mu\text{L}^{-1}$ ) and ST6GAL1 (4.4  $\mu\text{g}$  per  $\mu\text{mol}$  HMO) were added, and the reaction mixture was incubated overnight at 37 °C with gentle shaking. Reaction progress was monitored by MALDI-TOF MS, and if starting material remained after 18 h another portion of ST6GAL1 was added until no starting material could be detected. The reaction mixture was centrifuged using a Nanosep® Omega ultrafiltration device (10 kDa MWCO) to remove enzymes and BSA, and the filtrate was lyophilized. Purification by reverse-phase HPLC (see Section 2.a.) provided the desired product.

#### **General procedure for the installation of internal $\alpha$ 2,6 Neu5Ac on GlcNAc using ST6GALNAC5**

HMO acceptor and CMP-Neu5Ac (1.5 eq per Neu5Ac added) were dissolved at a final HMO concentration of 10 mM in a sodium cacodylate buffered solution (50 mM, pH 6.5) containing  $\text{MgCl}_2$  (10 mM) and BSA (0.1% *wt/wt*). CIAP ( $10 \text{ U } \mu\text{L}^{-1}$ ) and *N*-acetylgalactosaminide  $\alpha$ -2,6-sialyltransferase 5 (ST6GALNAC5, 4.4  $\mu\text{g}$  per  $\mu\text{mol}$  HMO) were added, and the reaction mixture was incubated overnight at 37 °C with gentle shaking. Reaction progress was monitored by MALDI-TOF MS, and if starting material remained after 18 h another portion of ST6GALNAC5 was added until no starting material could be detected. The reaction mixture was centrifuged using a Nanosep® Omega ultrafiltration device (10 kDa MWCO) to remove enzymes and BSA, and the filtrate was lyophilized. Purification by reverse-phase HPLC (see Section 2.a.) provided the desired product.

#### **Procedure for the cleavage of an $\alpha$ 2,6 sialoside using *Arthrobacter ureafaciens* sialidase (compound 19)**

HMO **18** (0.5 mg, 0.21  $\mu\text{mol}$ ) was dissolved at a final concentration of 10 mM in a sodium acetate buffered solution (50 mM, pH 5.5) containing  $\text{CaCl}_2$  (5 mM) and BSA (0.1% *wt/wt*). *Arthrobacter ureafaciens* sialidase ( $2 \text{ U } \mu\text{L}^{-1}$ ) was added and the reaction mixture was incubated for 4 h at 37 °C with gentle shaking. The reaction mixture was centrifuged using a Nanosep® Omega ultrafiltration device (10 kDa MWCO) to remove enzymes and BSA, and the filtrate was lyophilized. Purification by reverse-phase HPLC (see Section 2.a.) provided **19** (0.4 mg, 89%) as a white solid.

#### **Procedure for the cleavage of an $\alpha$ 1,2 fucoside (compound 22)**

HMO **21** (0.4 mg, 0.17  $\mu\text{mol}$ ) was dissolved at a final concentration of 10 mM in a Tris buffered solution (50 mM, pH 6.5) containing BSA (0.1% *wt/wt*). Microbial 1,2- $\alpha$ -L-fucosidase ( $0.5 \text{ U } \mu\text{L}^{-1}$ ) was added and the reaction mixture was incubated overnight at 37 °C with gentle shaking. Reaction progress was monitored by MALDI-TOF MS and when no starting material could be detected the reaction mixture was centrifuged using a Nanosep® Omega ultrafiltration device (10 kDa

MWCO) to remove enzymes and BSA, and the filtrate was lyophilized. Purification by reverse-phase HPLC (see Section 2.a.) provided **22** (0.3mg, 82%) as a white solid.

## 2.d. Enzymatic Flowchart of HMO Library Members

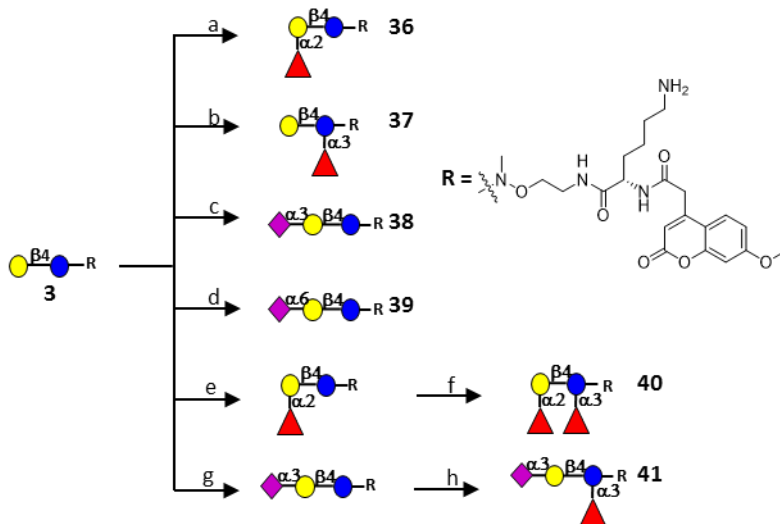

**Figure S2: Lactose Modified HMOs.**

a) FUT1, GDP-Fuc; b) FUT5, GDP-Fuc; c) ST3GAL4, CMP-Neu5Ac; d) ST6GAL1, CMP-Neu5Ac; e) FUT1, GDP-Fuc; f) FUT3, GDP-Fuc; g) ST3GAL4, CMP-Neu5A; h) FUT3, GDP-Fuc.

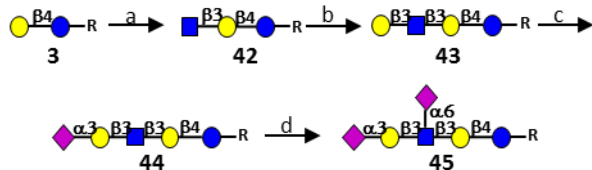

**Figure S3: DSLNT Synthesis.**

a) B3GNT2, UDP-GlcNAc; b) GalT1, UDP-Gal; c) ST3GAL4, CMP-Neu5Ac; d) ST6GALNac5, CMP-Neu5Ac

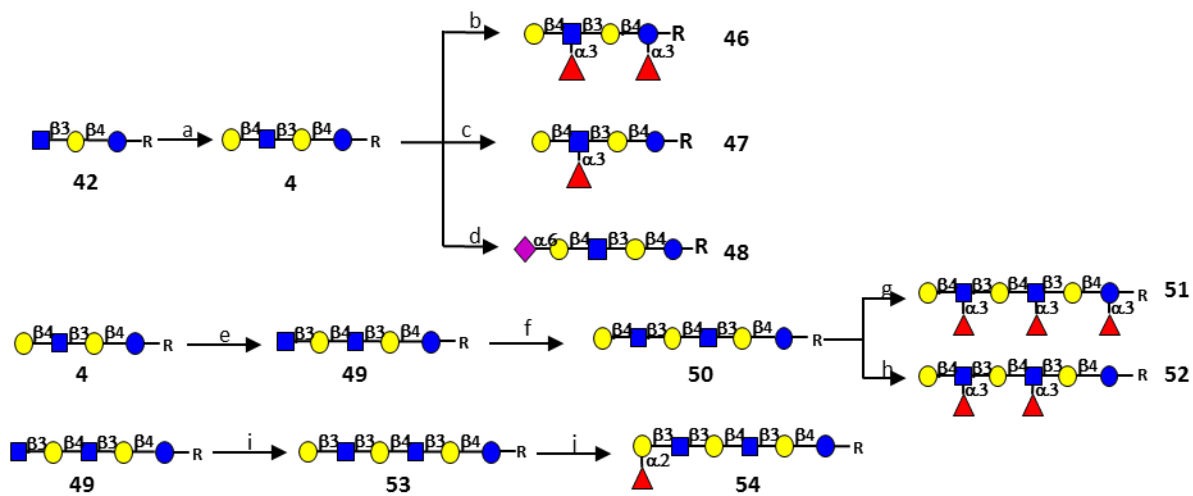

**Figure S4: Lacto-N-neotetraose and para-Lacto-N-neohexaose derivatives.**

a) GalT1, UDP-Gal; b) FUT5, GDP-Fuc; c) FUT9, GDP-Fuc; d) ST6GAL1, CMP-Neu5Ac; e) B3GNT2, UDP-GlcNAc; f) GalT1, UDP-Gal; g) FUT5, GDP-Fuc; h) FUT9, GDP-Fuc; i) B3GALT5, UDP-Gal; j) FUT1, GDP-Fuc

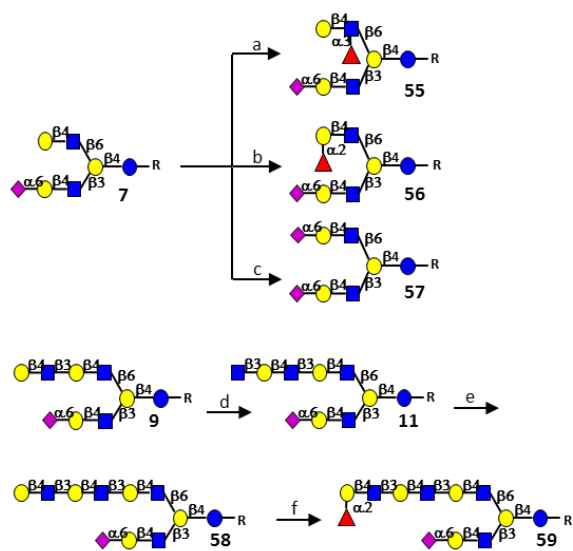

**Figure S5: Synthesis of Bi-Antennary HMOs Bearing a  $\beta$  6'SialylLacNAc.**

a) FUT5, GDP-Fuc; b) FUT1, GDP-Fuc; c) ST6GAL1, CMP-Neu5Ac; d) B3GNT2, UDP-GlcNAc; e) GalT1, UDP-Gal; f) FUT1, GDP-Fuc.

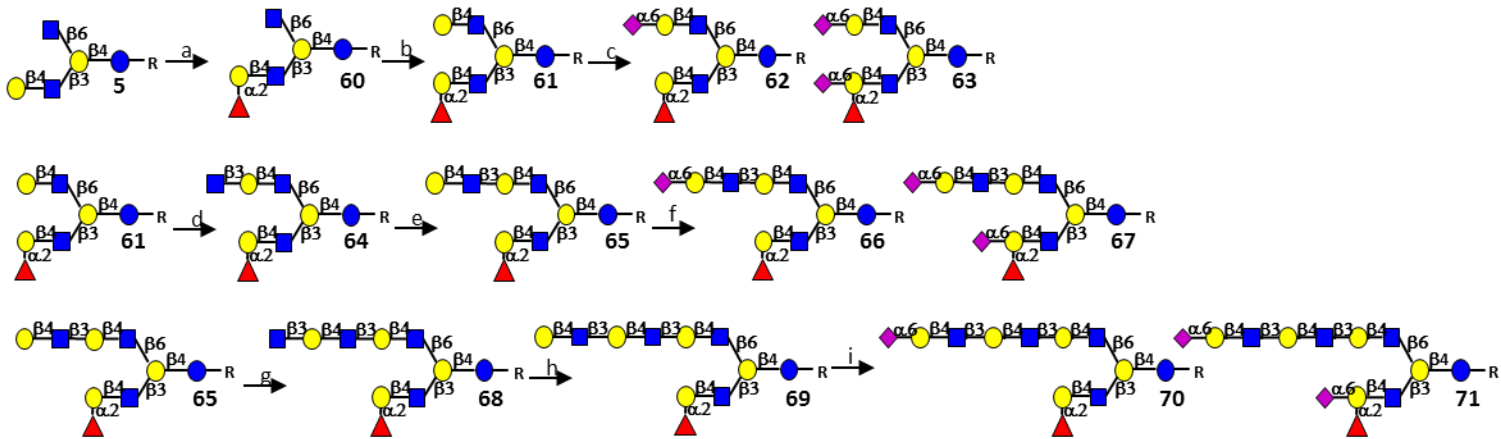

**Figure S6: Synthesis of Bi-Antennary HMOs Bearing a  $\beta 3$  H2 Epitope.**

a) FUT1, GDP-Fuc; b) GalT1, UDP-Gal; c) ST6GAL1, CMP-Neu5Ac; d) B3GnT2, UDP-GlcNAc; e) GalT1, UDP-Gal; f) ST6GAL1, CMP-Neu5Ac; g) B3GNT2, UDP-GlcNAc; h) GalT1, UDP-Gal; i) ST6GAL1, CMP-Neu5Ac.

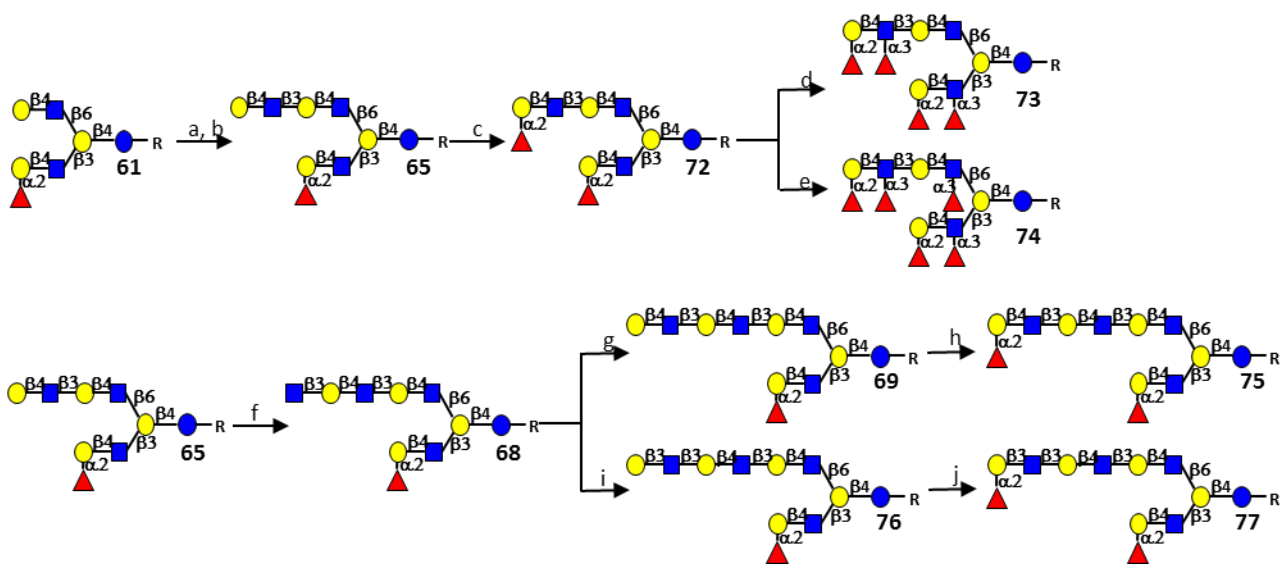

**Figure S7:  $\beta 3$  H2 and Le<sup>Y</sup> fucosylated derivatives.**

a) B3GNT2, UDP-GlcNAc; b) GalT1, UDP-Gal; c) FUT1, GDP-Fuc; d) FUT3, GDP-Fuc; e) FUT5, GDP-Fuc; f) B3GNT2, UDP-GlcNAc; g) GalT1, UDP-Gal; h) FUT1, GDP-Fuc; i) B3GALTS, UDP-Gal; j) FUT1, GDP-Fuc.

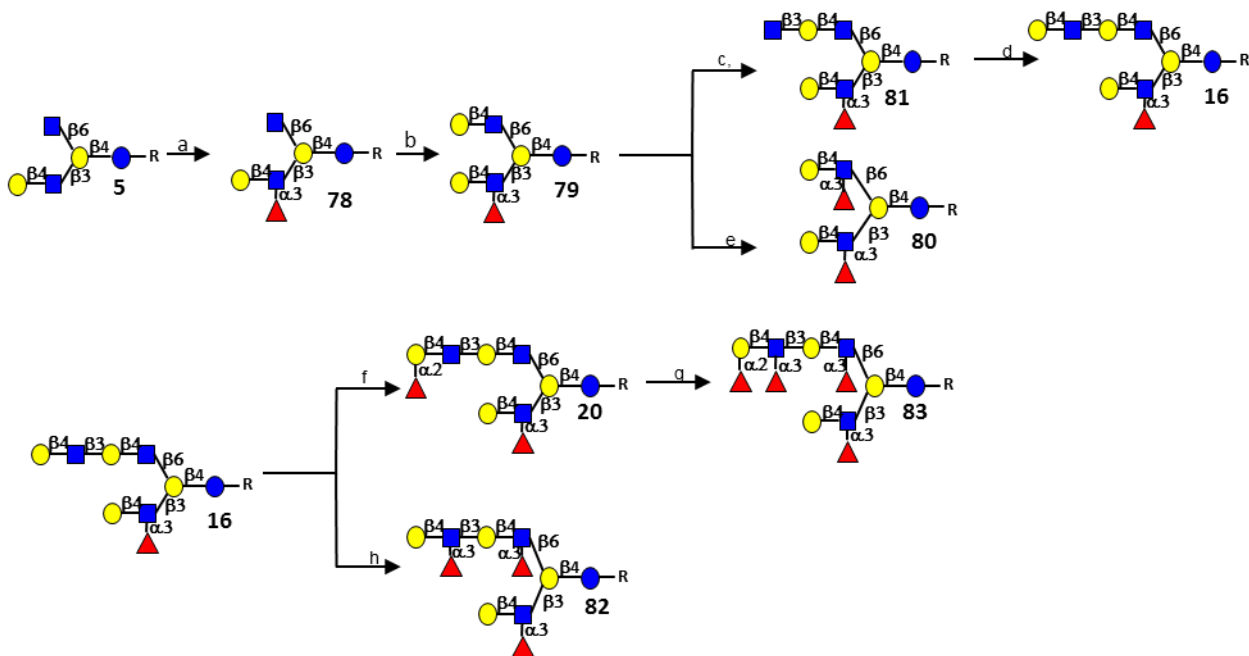

**Figure S8:  $\beta 3$  Le<sup>x</sup> Derivatives**

a) FUT5, GDP-Fuc; b) GalT1, UDP-Gal; c) B3GNT2, UDP-GlcNAc; d) GalT1, UDP-Gal; e) FUT5, GDP-Fuc; f) FUT1, GDP-Fuc; g) FUT5, GDP-Fuc; h) FUT5, GDP-Fuc.

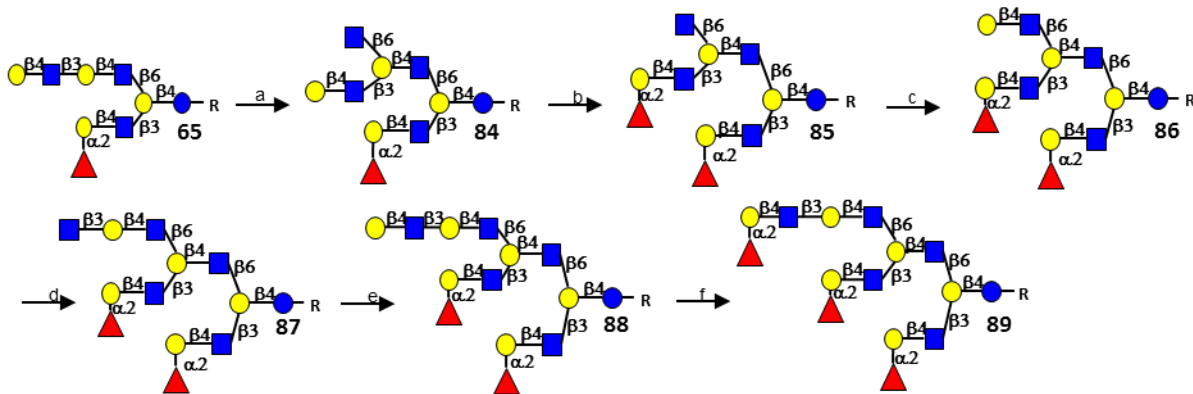

**Figure S9: Synthesis of an asymmetric, tri-antennary HMO.**

a) GCNT2, UDP-GlcNAc; b) FUT1, GDP-Fuc; c) GalT1, UDP-Gal; d) B3GNT2, UDP-GlcNAc; e) GalT1, UDP-Gal; f) FUT1, GDP-Fuc

## 2.e. Identification Numbers for Printed HMO Library Members

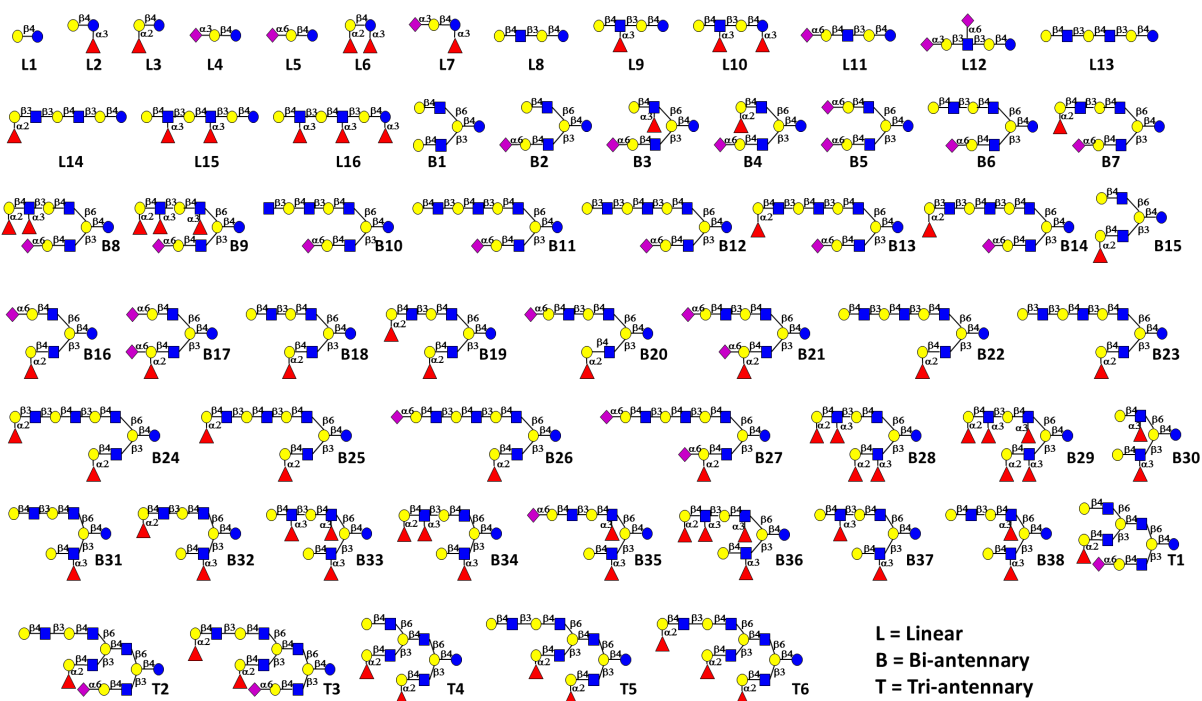

Figure S10: HMO Library Members.

Table S2. Library identifier with corresponding compound synthesis number.

| Library Number | Number in Scheme |
|----------------|------------------|----------------|------------------|----------------|------------------|----------------|------------------|
| L1             | 3                | L16            | 51               | B15            | 61               | B30            | 80               |
| L2             | 37               | B1             | n/d              | B16            | 62               | B31            | 16               |
| L3             | 36               | B2             | 7                | B17            | 63               | B32            | 20               |
| L4             | 38               | B3             | 55               | B18            | 65               | B33            | 82               |
| L5             | 39               | B4             | 56               | B19            | 72               | B34            | 21               |
| L6             | 40               | B5             | 57               | B20            | 66               | B35            | 18               |
| L7             | 41               | B6             | 9                | B21            | 67               | B36            | 83               |
| L8             | 4                | B7             | 10               | B22            | 69               | B37            | 22               |
| L9             | 47               | B8             | 14               | B23            | 76               | B38            | 19               |
| L10            | 46               | B9             | 15               | B24            | 77               | T1             | 25               |
| L11            | 48               | B10            | 11               | B25            | 75               | T2             | 27               |
| L12            | 45               | B11            | 58               | B26            | 70               | T3             | 28               |
| L13            | 50               | B12            | 12               | B27            | 71               | T4             | 86               |
| L14            | 54               | B13            | 59               | B28            | 73               | T5             | 88               |
| L15            | 52               | B14            | 13               | B29            | 74               | T6             | 89               |

n/d = not described

## 2.f. HPLC Traces

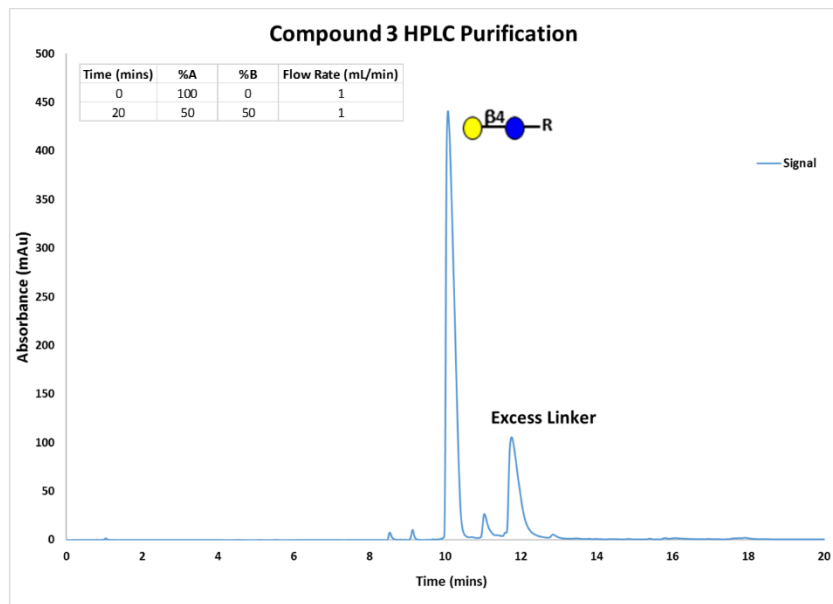

**Figure S11: Reverse Phase Analytical Purification of Compound 3.**  
A = 50mM Ammonium Bicarbonate; B = Acetonitrile.

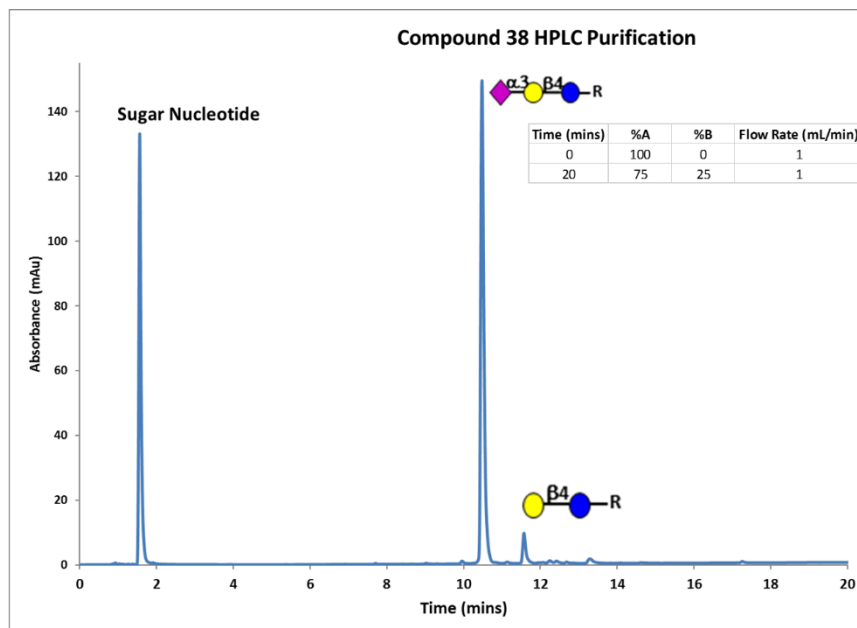

**Figure S12: Reverse Phase Analytical Purification of Compound 38.**  
A = 50mM Ammonium Bicarbonate; B = Acetonitrile.

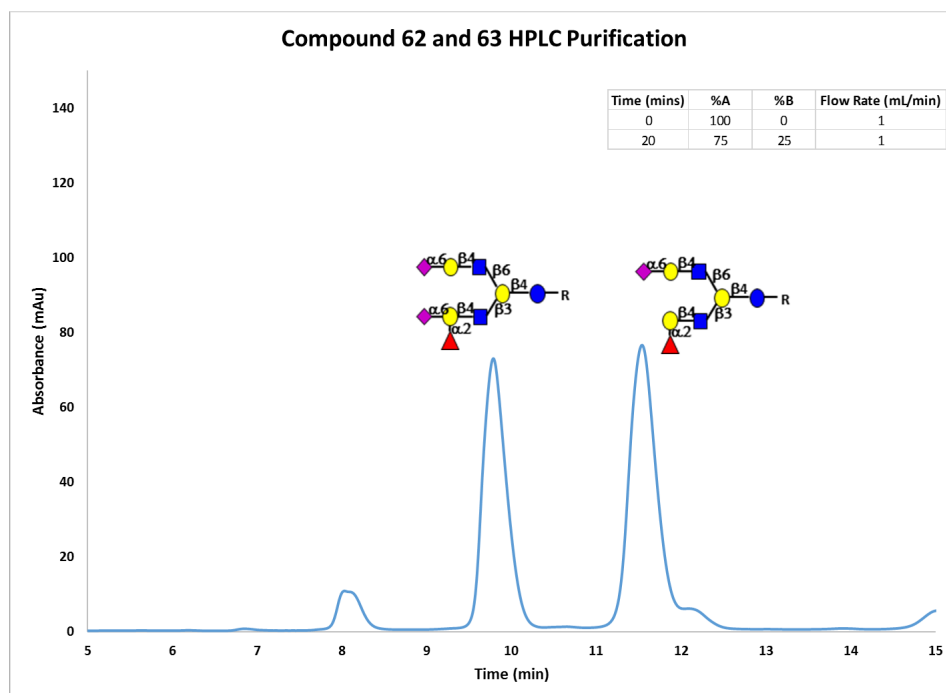

**Figure S13: Reverse Phase Analytical Purification of Compound 62 and 63.**  
 A = 50mM Ammonium Bicarbonate; B = Acetonitrile.



### 3. NMR and MS

#### 3.a. NMR Nomenclature

Glycan assignments were made by numbering each monosaccharide starting from the reducing terminus and continuing in sequential order by proceeding to the  $\beta$ 3 branch. Once all  $\beta$ 3 monosaccharides had been counted, numbering continued on the  $\beta$ 6 branch. In the example of a tri-antennary structures, the monosaccharides on the lower  $\beta$ 3 branch are counted before residues on the upper  $\beta$ 3 branch. Two complex targets are illustrated below in addition to the numbering on the anomeric linker.

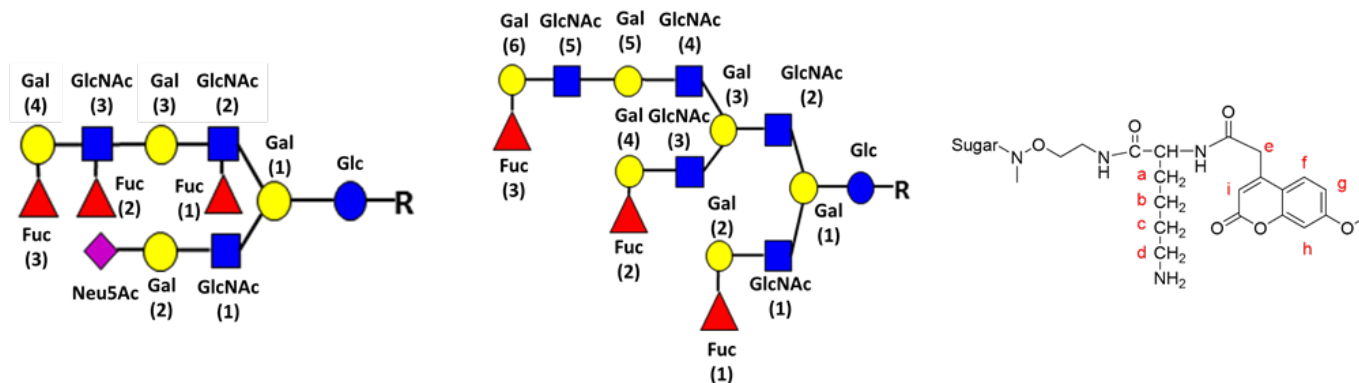

### 3.b. Structure Elucidation of Compound 5 by 1D and 2D NMR Analysis

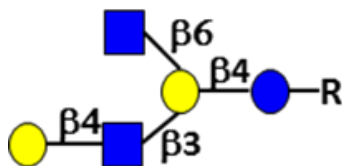

The reducing H-1 of Glc could be readily assigned due to a large upfield shift in both the  $^1\text{H}$  and  $^{13}\text{C}$  relative to the other anomeric signals which is a result of the *N*-methylhydroxylamine aglycon as seen in the HSQC spectrum in Fig. S14. Additionally, there is a Nuclear Overhauser Effect (NOE) between the anomeric H-1 of Glc and the methyl attached to the nitrogen of the hydroxylamine. The equatorial H-4 of Gal gives a diagnostic downfield signal ( $\delta 3.98$  and  $\delta 3.76$ ) compared

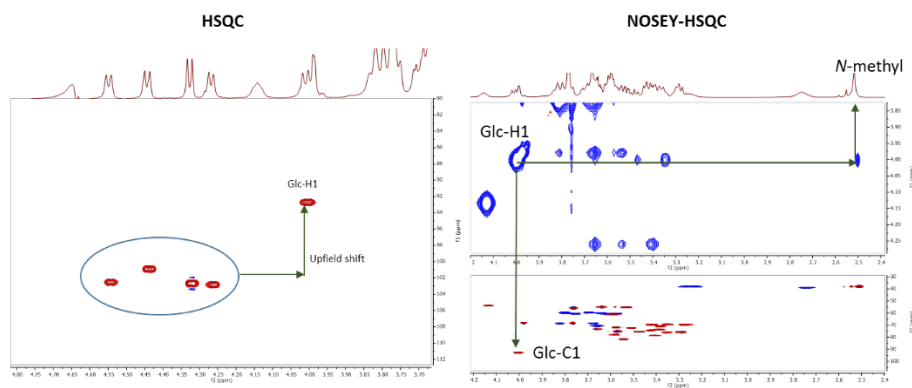

Figure S14: Assignment of reducing Glc H1.

to other the axial H-4 signals of Glc or GlcNAc. As such, the Gal anomeric proton signals could be determined to  $\delta 4.32$  and  $\delta 4.26$ . Assigning these shifts to a particular Gal was straight forward as the H-4 on the terminal Gal (*i.e.* no glycosidic bond with the H-3 position) is more upfield compared to a H-4 on the penultimate Gal (Fig. S15).

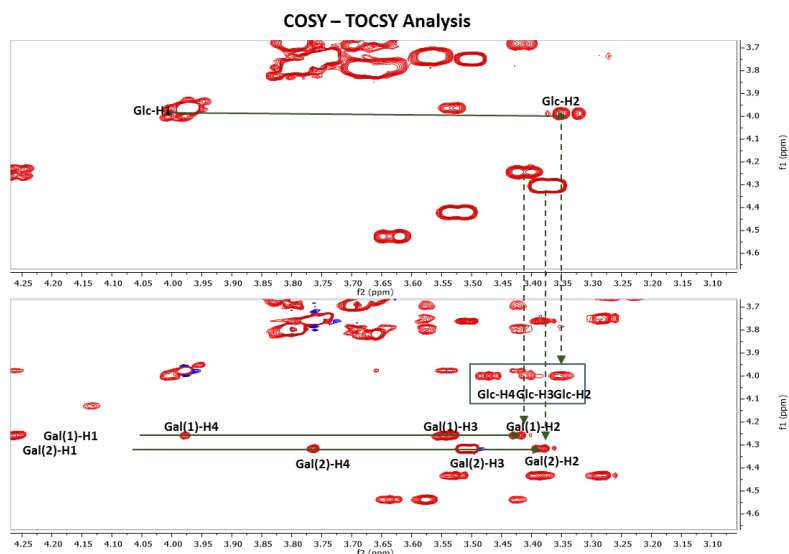

Figure S15: Assignment of both Gal H1 to H4 signals.

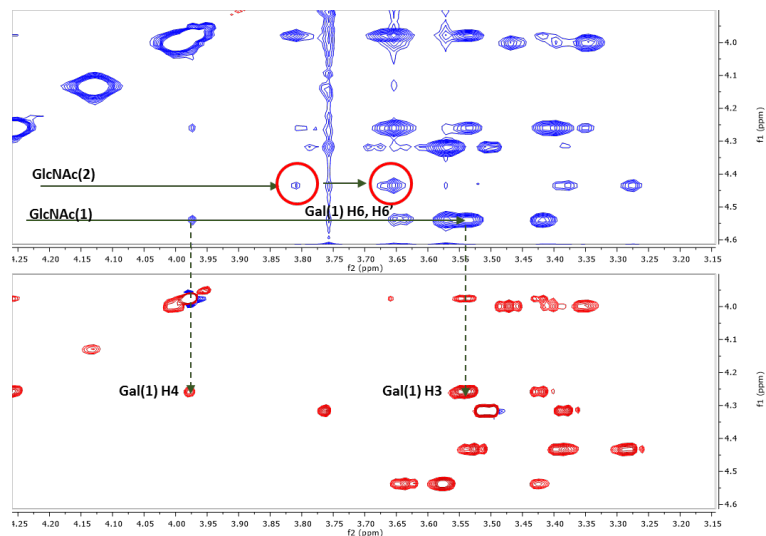

**Figure S16: GlcNAc assignment using NOSEY-TOCSY analysis.**

Finally, the two GlcNAc residues could be identified by investigating the NOSEY-TOCSY signals of their anomeric peaks. It was expected that GlcNAc(1) H-1 would have a NOE correlation with the penultimate Gal H-3 involved in the glycosidic bond. Fig. S16 shows that, indeed, there is a through space correlation between the GlcNAc anomeric at  $\delta$ 4.26 and the H3 from Gal(1) at  $\delta$ 3.54. Furthermore, there is an additional through space NOE with the H-4 on Gal(1) at  $\delta$ 3.98. The H-1 of GlcNAc(2) shows a through space correlation with  $\delta$ 3.81 and  $\delta$ 3.68 which corresponds to the H-6/6' of Gal(1) that are involved in the  $\beta$ 6 glycosidic bond. Finally, investigation of the  $^{13}\text{C}$ - $^1\text{H}$  correlation (Fig. S17) of these two H-6 signals shows a downfield shift in their carbon value compared to other H6/6' positions not involved in a glycosidic bond.

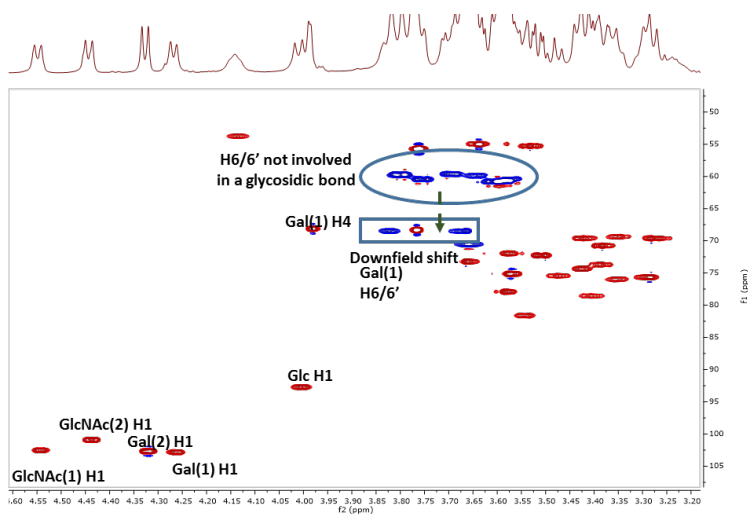

**Figure S17: HSQC Analysis.**

### 3.c. NMR Analysis of Fucose Connectivity for Compound 21

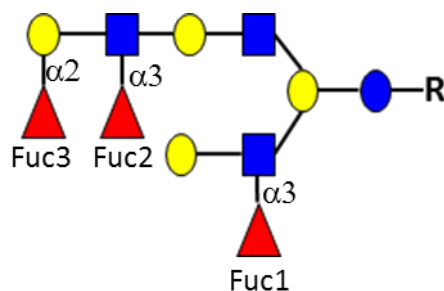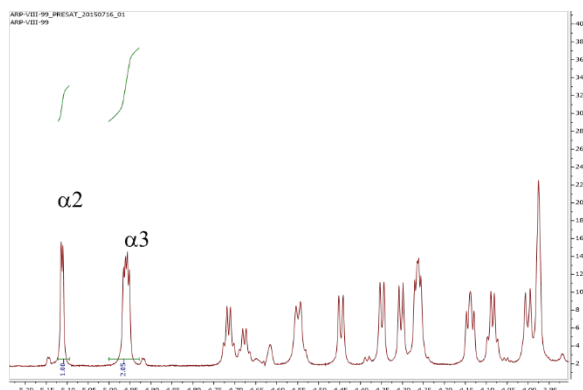

**Figure S18: Proton Spectrum of Compound 21.**

Fucose anomeric peaks are shifted downfield compared to the other anomeric signals as a result of the  $\alpha$ -configuration.

The fucose connectivity could be determined by using a combination of 1D and 2D NMR techniques assisted by the presence of reporter signals within the molecule. Fucoside anomeric signals are downfield compared to the Glc, Gal, and GlcNAc peaks as they are the only linkage with an  $\alpha$ -configuration. As shown in Fig. S18, the signal at  $\delta$ 5.11 corresponds to the H-1 of the  $\alpha$ 2 Fucoside whereas the signal at  $\delta$ 4.96 relates to two H-1 signals from both  $\alpha$ 3 Fucoside moieties, an observation supported by peak area integration.

We next looked to confirm this assignment by analyzing glycosidic connectivity of fucose with its corresponding Gal or GlcNAc. As previously mentioned, the Gal TOCSY spectrum shows characteristic downfield shift in the H-4 signal compared to the H-2 and H-3 signal. Furthermore, if the Gal is internal vs terminal, the H-4 of the internal will be more downfield than the terminal. An examination of Fig. S19 shows three Gal anomeric signals.  $\delta$ 4.26 corresponds to internal Gal 1 and 3 as indicated by the  $\delta$ 0.24 ppm downfield shift in the H4. Accordingly, the signals at  $\delta$ 4.30 and 4.35 must relate the H-1 of Gal 2 and 4. To uncover the which signal corresponds to a particular Gal, NOSEY-TOCSY analysis can be performed looking at the  $\alpha$ 2 Fucose anomeric signal.

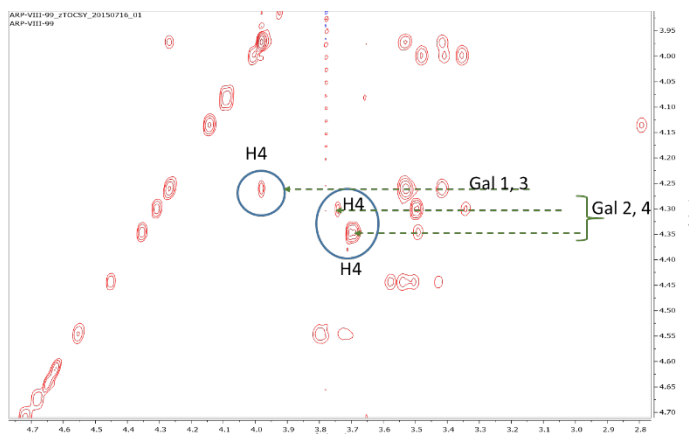

**Figure S19: Assignment of Galactose Anomeric Signals Using Characteristic H4 Shift Patterns.**

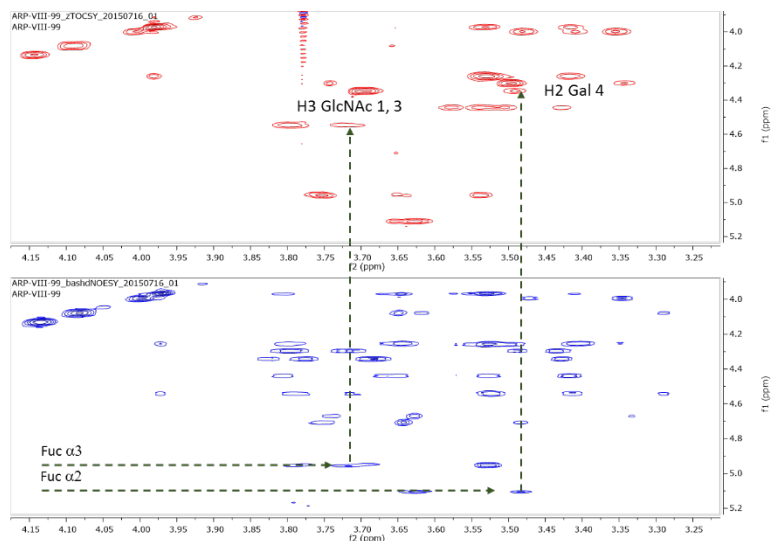

Figure S20: NOSEY-TOCSY Analysis of Anomeric Signals of  $\alpha$ 2 and  $\alpha$ 3 Fucose.

and 3. As in the case of the two internal Gal residues, GlcNAc 1 and 3 also have overlapping signals as they have a similar chemical environment. Finally, the anomeric signal of GlcNAc 2 could be assigned to be  $\delta$ 4.44 as it illustrates a diagnostic upfield  $^1\text{H}$  and  $^{13}\text{C}$  signal compared to the H-1 signals for GlcNAc 1 and 3 at  $\delta$ 4.55. Fig. S21 shows the full anomeric assignments of all monosaccharide residues of compound **21**.

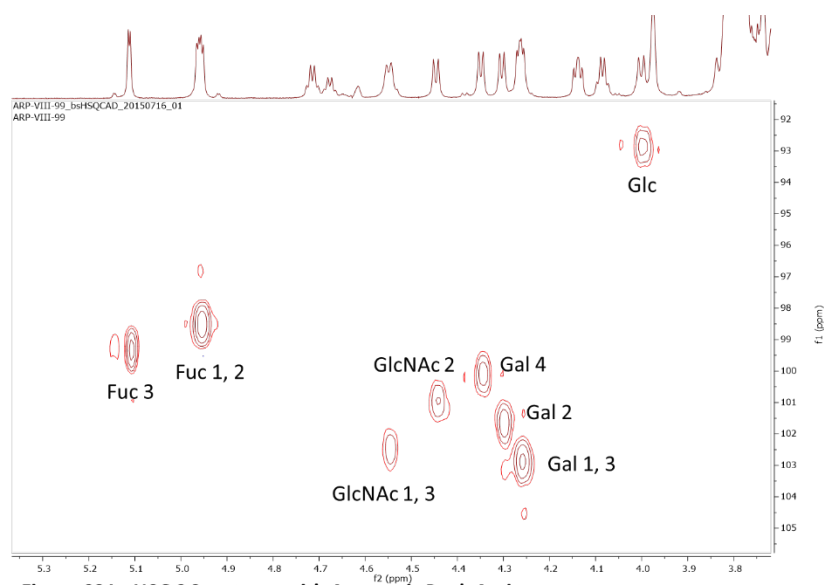

Figure S21: HSQC Spectrum with Anomeric Peak Assignment.

Turning our attention to the  $\alpha$ 2 Fucoside anomeric peak, we observed a through space correlation with the peak at  $\delta$ 3.48 which also gave a through bond TOCSY correlation with the anomeric  $\delta$ 4.35. As such, we could definitively identify the non-reducing, terminal Gal 4 anomeric signal. By process of elimination, the signal at  $\delta$ 4.30 was assigned to the anomeric signal of Gal 2. Additionally, the GlcNAc 1 and 3 anomeric signals could be assigned in a similar method by examining the through space correlation with the anomeric from the two  $\alpha$ 3 fucose units. Indeed, a through space signal was observed at  $\delta$ 3.72 which was confirmed to be the H3 from GlcNAc 1

### 3.d. NMR & MS Data for Library Members

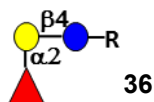

$^1\text{H}$  (600 MHz,  $\text{D}_2\text{O}$ ):  $\delta$  (ppm)

|            | H1                            | H2   | H3                 | H4   | H5   | H6            | $\text{CH}_3$                 |
|------------|-------------------------------|------|--------------------|------|------|---------------|-------------------------------|
| <b>Glc</b> | 4.00<br>(d, $J = 8.8$ Hz, 1H) | 3.83 | 3.43               | 3.53 | 3.25 | 3.85,<br>3.70 | - <sup>[b]</sup>              |
| <b>Gal</b> | 4.38<br>(d, $J = 7.6$ Hz, 1H) | 3.51 | n/a <sup>[a]</sup> | 3.74 | n/a  | 3.58          | -                             |
| <b>Fuc</b> | 5.16<br>(d, $J = 3.1$ Hz, 1H) | 3.65 | n/a                | n/a  | 4.05 | n/a           | 1.07<br>(d, $J = 6.4$ Hz, 3H) |

|                           |                               |
|---------------------------|-------------------------------|
| <b>N-CH<sub>3</sub></b>   | 2.52                          |
| <b>N-O-CH<sub>2</sub></b> | 3.68                          |
| <b>CH<sub>2</sub>-NH</b>  | 3.28                          |
| <b>C(O)-CH-NH</b>         | 4.17<br>(t, $J = 5.3$ Hz, 1H) |
| <b>A</b>                  | 1.70, 1.64                    |
| <b>B</b>                  | 1.26                          |
| <b>C</b>                  | 1.50                          |
| <b>D</b>                  | 2.76                          |
| <b>E</b>                  | 3.81                          |
| <b>F</b>                  | 7.53<br>(d, $J = 8.5$ Hz, 1H) |
| <b>G</b>                  | 6.91                          |
| <b>H</b>                  | 6.93                          |
| <b>I</b>                  | 6.20                          |
| <b>O-CH<sub>3</sub></b>   | 3.78                          |

<sup>[a]</sup> Not assigned

<sup>[b]</sup> Not applicable

$^{13}\text{C}$  from HSQC (150 MHz,  $\text{D}_2\text{O}$ ):  $\delta$  (ppm). 38.2 38.42 53.9 55.84 60.16 60.2 60.84 61.27 62.35 62.36 62.37 66.79 68.05 68.97 69.49 69.54 70.71 71.92 73.47 75.16 75.27 75.58 76.81 93.12 99.32 100.17 101.08 112.5 120.72 135.25

MALDI TOF-MS  $m/z$  calcd for  $\text{C}_{39}\text{H}_{60}\text{N}_4\text{O}_{20}\text{Na}$  ( $\text{M} + \text{Na}$ )<sup>+</sup> exact 927.3699, found 926.1988.

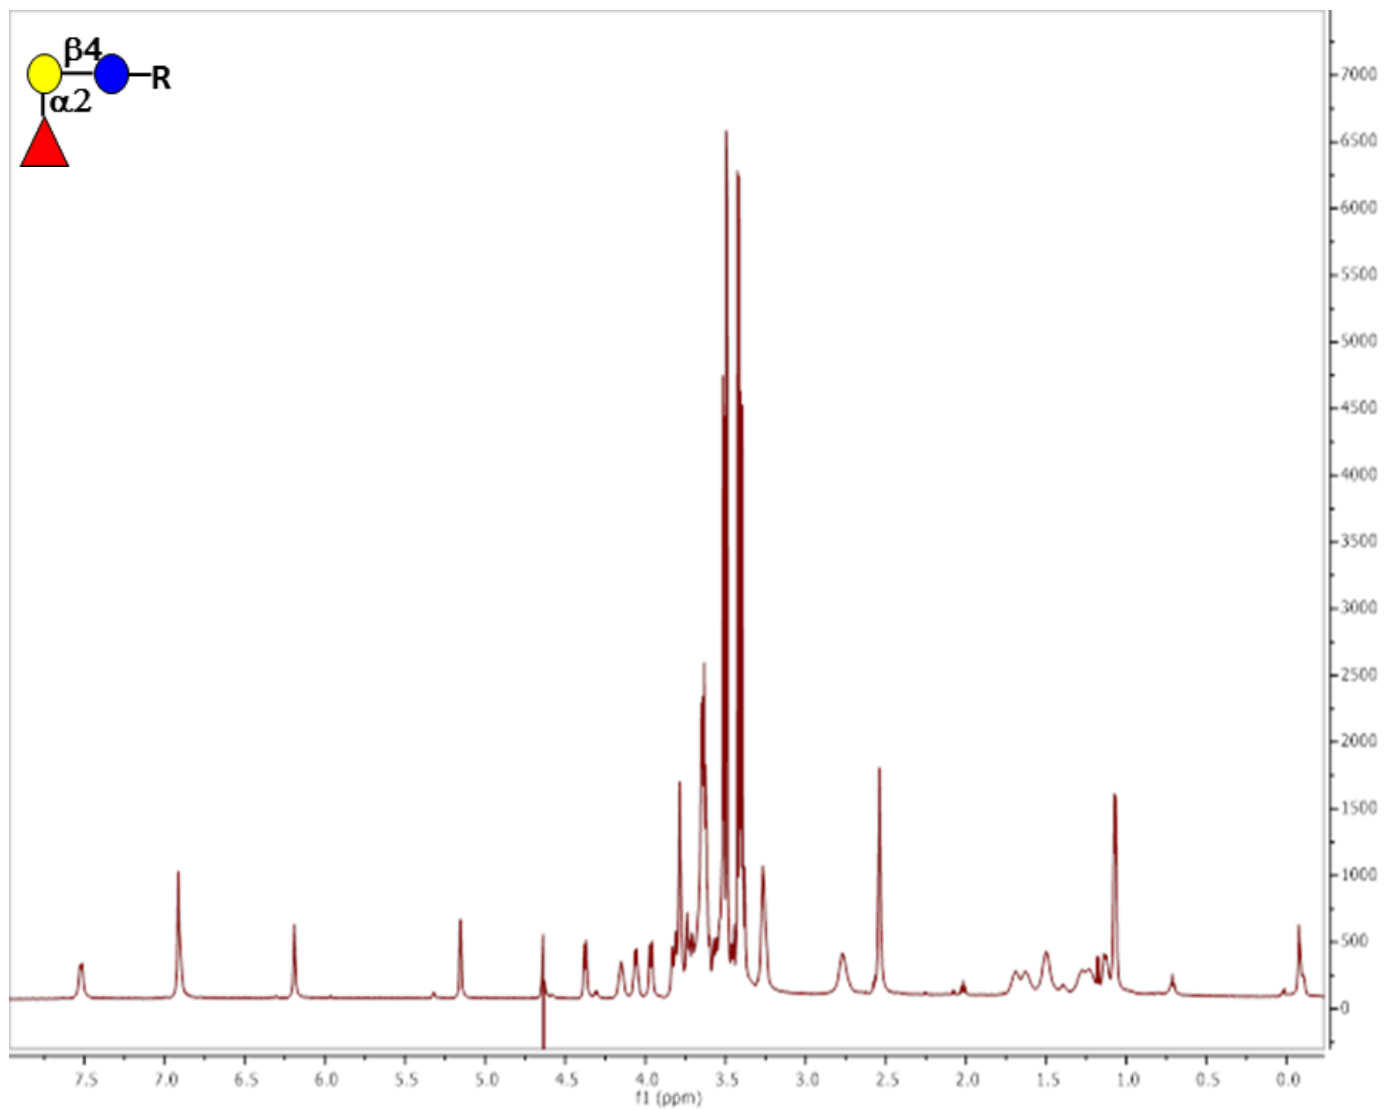

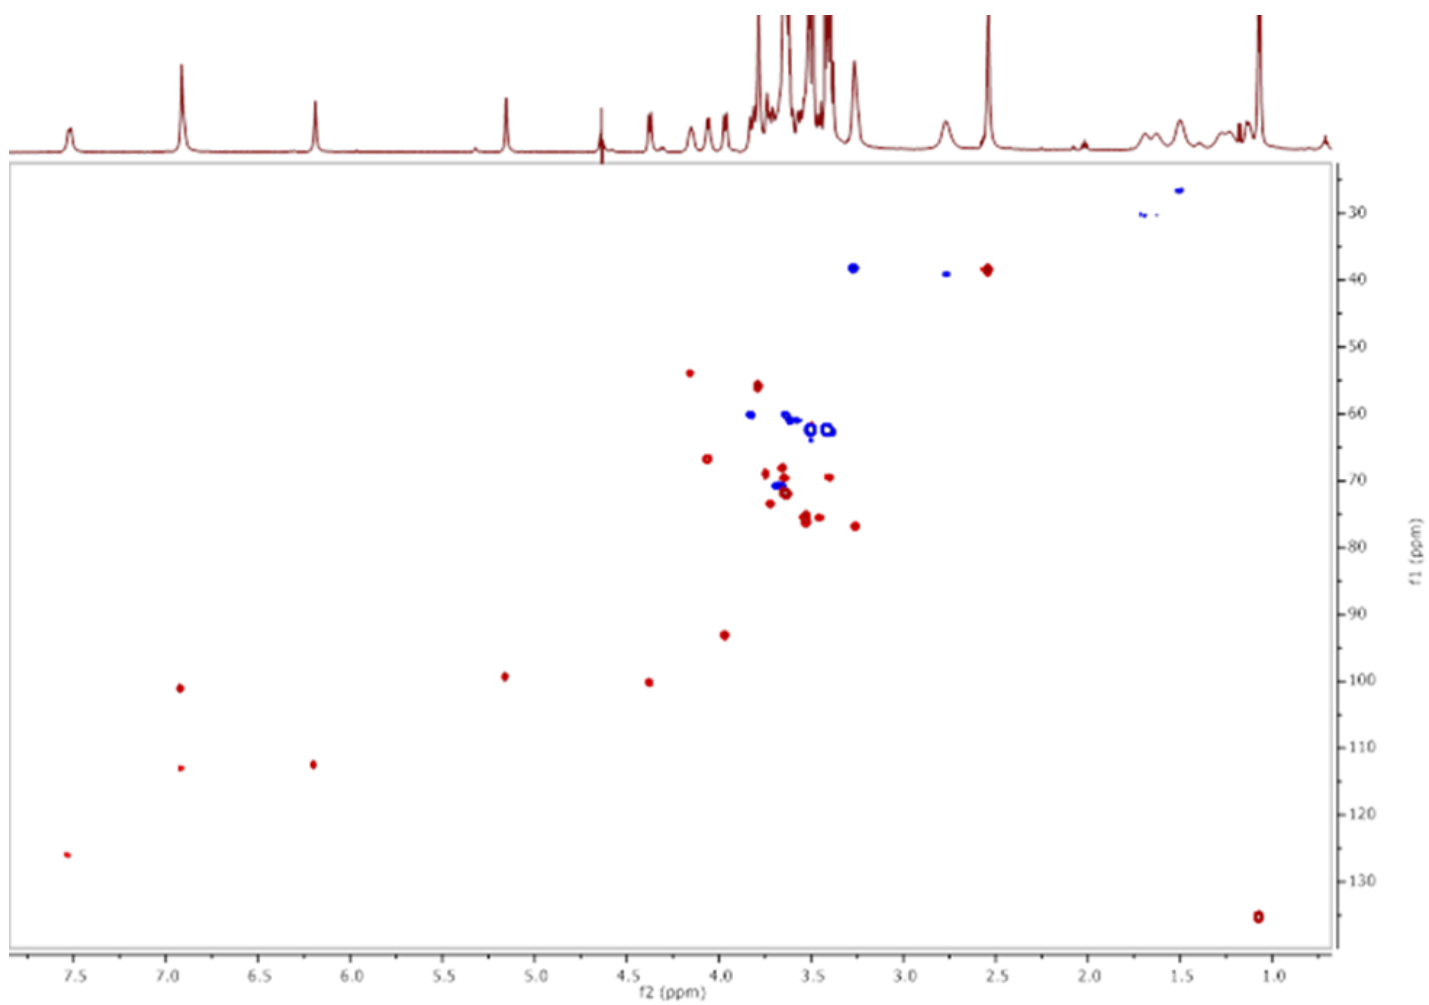



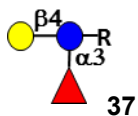

<sup>1</sup>H (600 MHz, D<sub>2</sub>O): δ (ppm)

|            | H1                          | H2   | H3   | H4   | H5                 | H6            | CH <sub>3</sub>             |
|------------|-----------------------------|------|------|------|--------------------|---------------|-----------------------------|
| <b>Glc</b> | 4.03<br>(d, J = 9.0 Hz, 1H) | 3.59 | 3.36 | 3.66 | n/a <sup>[a]</sup> | 3.85,<br>3.70 | - <sup>[b]</sup>            |
| <b>Gal</b> | 4.29<br>(d, J = 7.7 Hz, 1H) | 3.34 | 3.49 | 3.74 | n/a                | 3.58          | -                           |
| <b>Fuc</b> | 5.30<br>(d, J = 2.7 Hz, 1H) | 3.66 | 3.81 | 3.65 | 4.72               | n/a           | 1.04<br>(d, J = 5.5 Hz, 3H) |

|                           |                             |
|---------------------------|-----------------------------|
| <b>N-CH<sub>3</sub></b>   | 2.52                        |
| <b>N-O-CH<sub>2</sub></b> | 3.68                        |
| <b>CH<sub>2</sub>-NH</b>  | 3.28                        |
| <b>C(O)-CH-NH</b>         | 4.17<br>(t, J = 5.3 Hz, 1H) |
| <b>A</b>                  | 1.70, 1.64                  |
| <b>B</b>                  | 1.26                        |
| <b>C</b>                  | 1.50                        |
| <b>D</b>                  | 2.76                        |
| <b>E</b>                  | 3.81                        |
| <b>F</b>                  | 7.53<br>(d, J = 8.5 Hz, 1H) |
| <b>G</b>                  | 6.91                        |
| <b>H</b>                  | 6.93                        |
| <b>I</b>                  | 6.20                        |
| <b>O-CH<sub>3</sub></b>   | 3.78                        |

<sup>[a]</sup> Not assigned

<sup>[b]</sup> Not applicable

<sup>13</sup>C from HSQC (150 MHz, D<sub>2</sub>O): δ (ppm) 21.81, 26.38, 30.08, 37.93, 37.98, 38.90, 53.63, 55.64, 59.52, 59.55, 61.19, 66.24, 67.78, 67.80, 68.05, 68.97, 70.48, 70.84, 70.89, 70.89, 70.90, 71.66, 72.16, 72.38, 74.61, 76.64, 78.13, 92.90, 98.22, 100.95, 101.59, 112.33, 112.96, 112.98, 125.91, 154.61, 155.17.

MALDI TOF-MS *m/z* calcd for C<sub>39</sub>H<sub>60</sub>N<sub>4</sub>O<sub>20</sub>Na (M + Na)<sup>+</sup> exact 927.3699, found 926.7706.

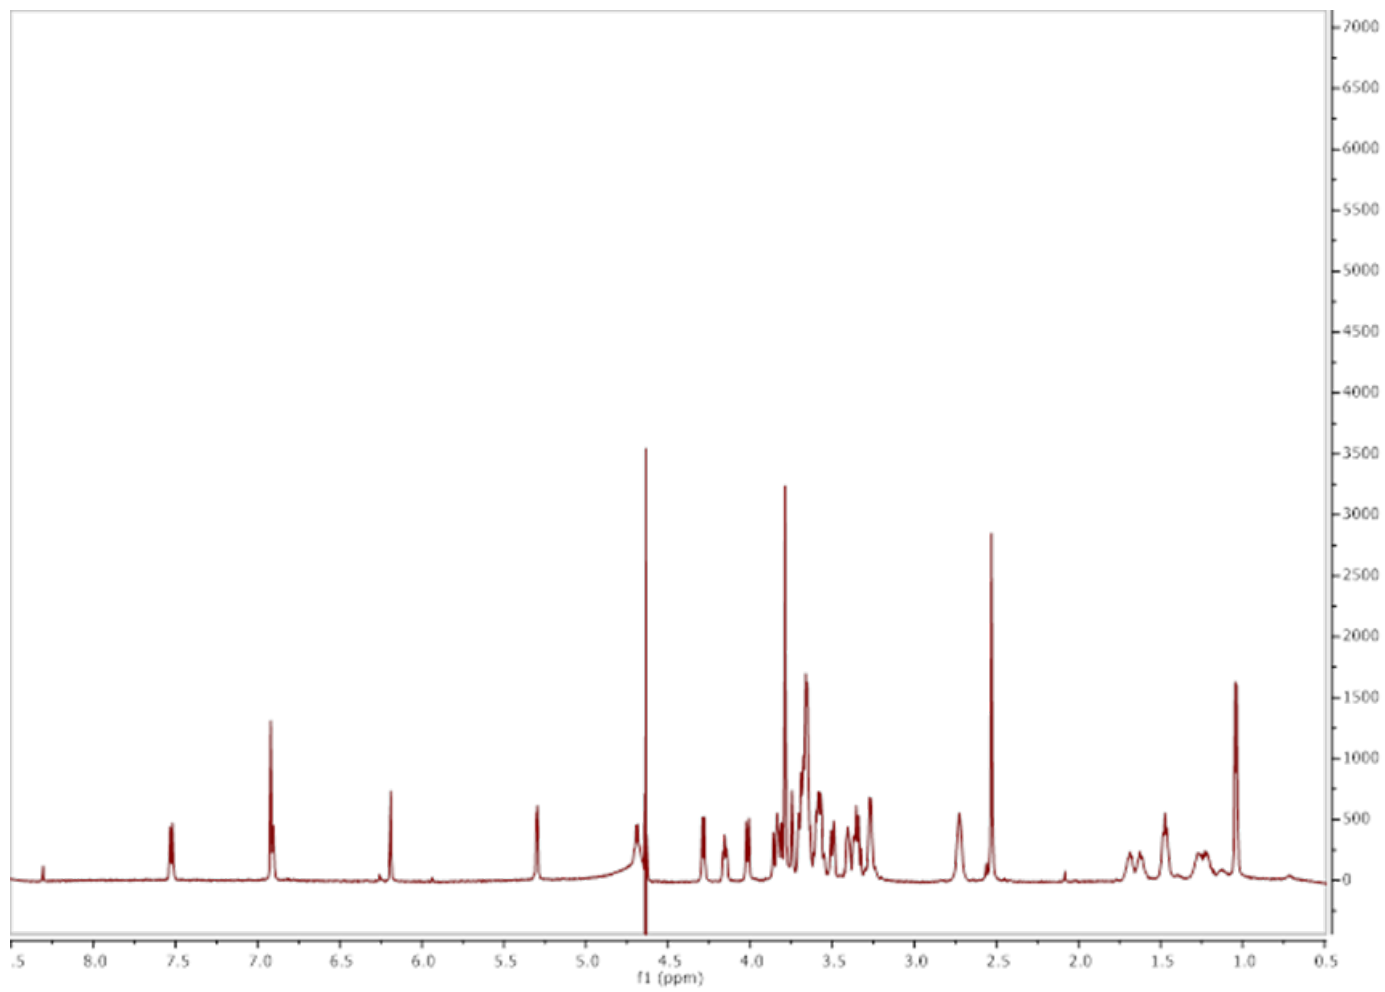

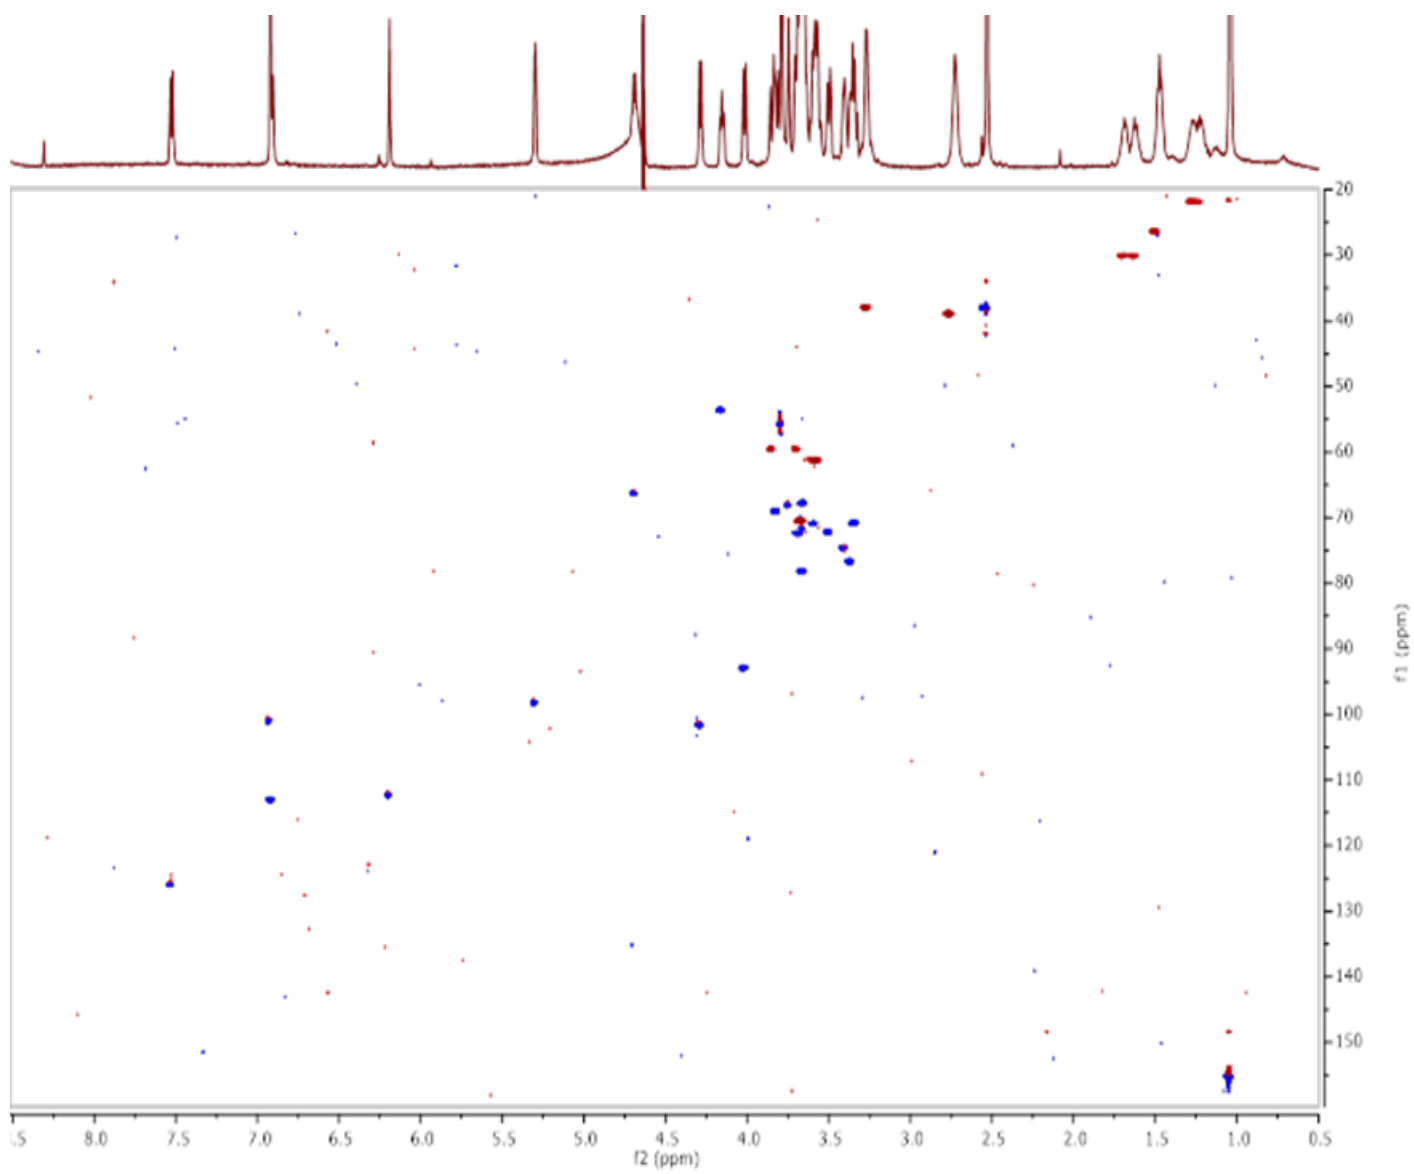

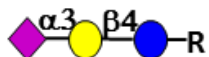

38

$^1\text{H}$  (600 MHz,  $\text{D}_2\text{O}$ ):  $\delta$  (ppm)

|               | H1                            | H2   | H3                                                    | H4   | H5               | H6            | H7                 | H8   | H9           | NH Acetyl |
|---------------|-------------------------------|------|-------------------------------------------------------|------|------------------|---------------|--------------------|------|--------------|-----------|
| <b>Glc</b>    | 4.03<br>(d, $J = 9.2$ Hz, 1H) | 3.39 | 3.51                                                  | 3.70 | - <sup>[a]</sup> | 3.84,<br>3.69 | n/a <sup>[b]</sup> | n/a  | n/a          | n/a       |
| <b>Gal</b>    | 4.29<br>(d, $J = 7.7$ Hz, 1H) | 3.34 | 3.49                                                  | 3.74 | -                | 3.58          | n/a                | n/a  | n/a          | n/a       |
| <b>Neu5Ac</b> | -                             | -    | 2.64 - eq<br>(dd, $J = 12.4, 4.6$ Hz)<br>1.67 - axial | 3.56 | 3.51             | 3.73          | 3.44               | 3.48 | 3.75<br>3.52 | 1.94      |

|                           |                                             |
|---------------------------|---------------------------------------------|
| <b>N-CH<sub>3</sub></b>   | 2.57                                        |
| <b>N-O-CH<sub>2</sub></b> | 3.70                                        |
| <b>CH<sub>2</sub>-NH</b>  | 3.28<br>(ddd, $J = 20.1, 10.4, 4.2$ Hz, 2H) |
| <b>C(O)-CH-NH</b>         | 4.18<br>(dd, $J = 8.6, 6.0$ Hz, 1H)         |
| <b>A</b>                  | 1.71<br>1.65                                |
| <b>B</b>                  | 1.26                                        |
| <b>C</b>                  | 1.55                                        |
| <b>D</b>                  | 2.82<br>(ddd, $J = 13.7, 8.8, 4.9$ Hz, 2H)  |
| <b>E</b>                  | 3.81                                        |
| <b>F</b>                  | 7.54                                        |
| <b>G</b>                  | 6.93                                        |
| <b>H</b>                  | 6.94                                        |
| <b>I</b>                  | 6.21                                        |
| <b>O-CH<sub>3</sub></b>   | 3.84                                        |

<sup>[a]</sup> Not assigned

<sup>[b]</sup> Not applicable

$^{13}\text{C}$  from HSQC (150 MHz,  $\text{D}_2\text{O}$ ):  $\delta$  (ppm) 51.54, 53.82, 55.23, 55.82, 56.41, 58.28, 60.00, 60.01, 60.9, 62.44, 62.44, 67.31, 67.95, 68.14, 69.21, 69.40, 70.61, 71.63, 72.74, 75.04, 75.35, 75.42, 76.16, 77.86, 92.89, 101.01, 101.59, 102.41, 112.40, 112.97, 112.99, 120.94, 121.86, 121.99, 122.46, 125.85, 126.01, 126.46, 130.30, 133.18, 133.20, 138.11, 138.17, 138.41, 138.72, 138.95, 139.45, 139.46, 139.52, 139.55.

MALDI TOF-MS  $m/z$  calcd for  $\text{C}_{44}\text{H}_{66}\text{O}_{24}\text{N}_5\text{Na}_2$  ( $\text{M} + 2\text{Na}$ )<sup>+</sup> exact 1094.3899, found 1093.9410.

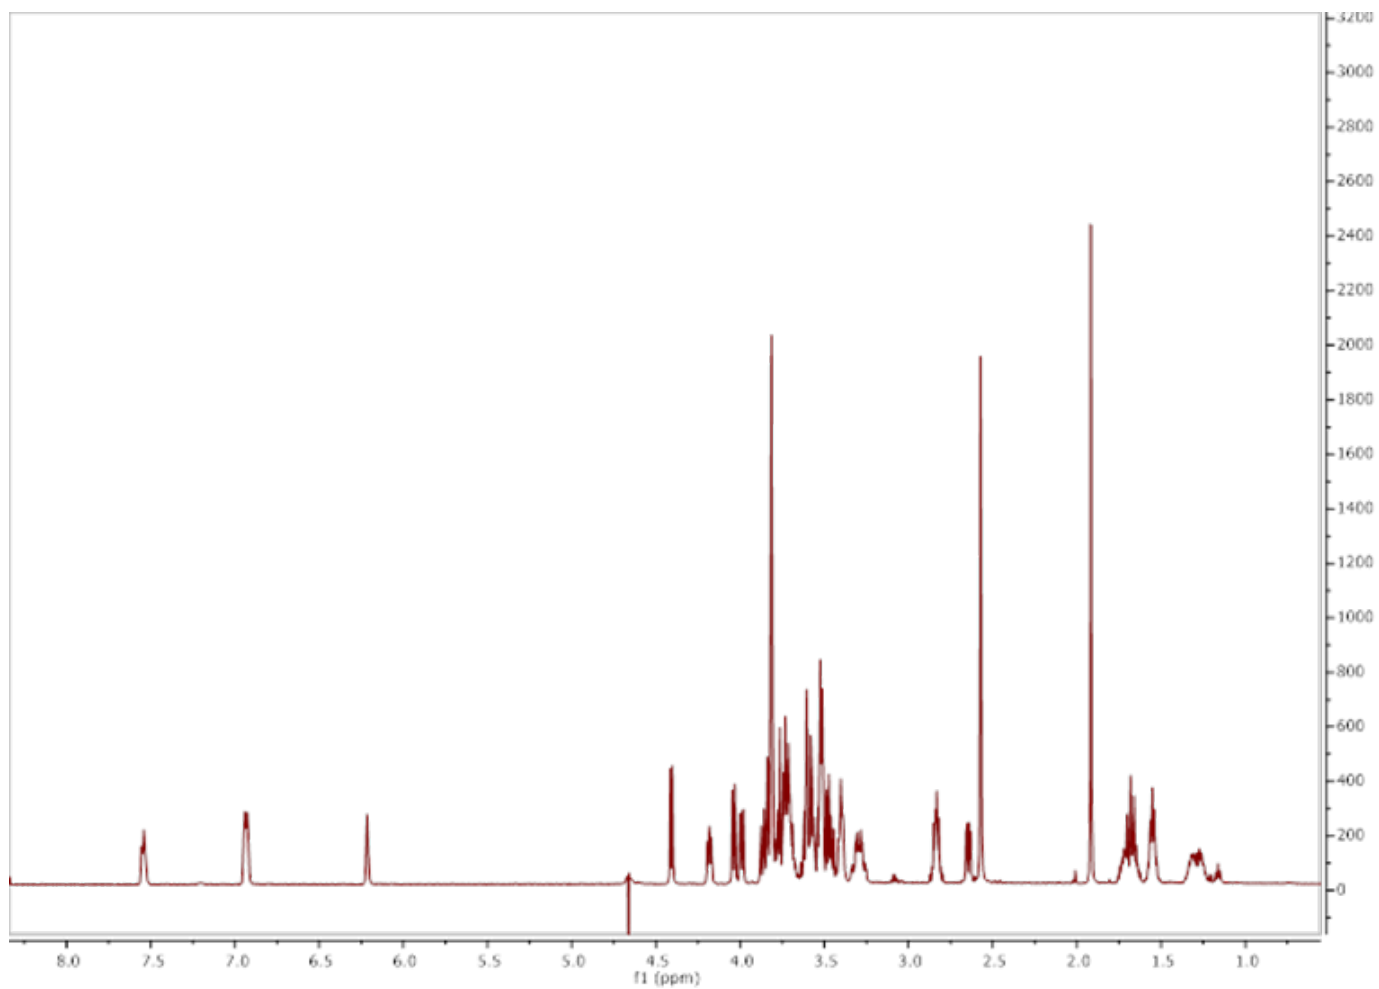

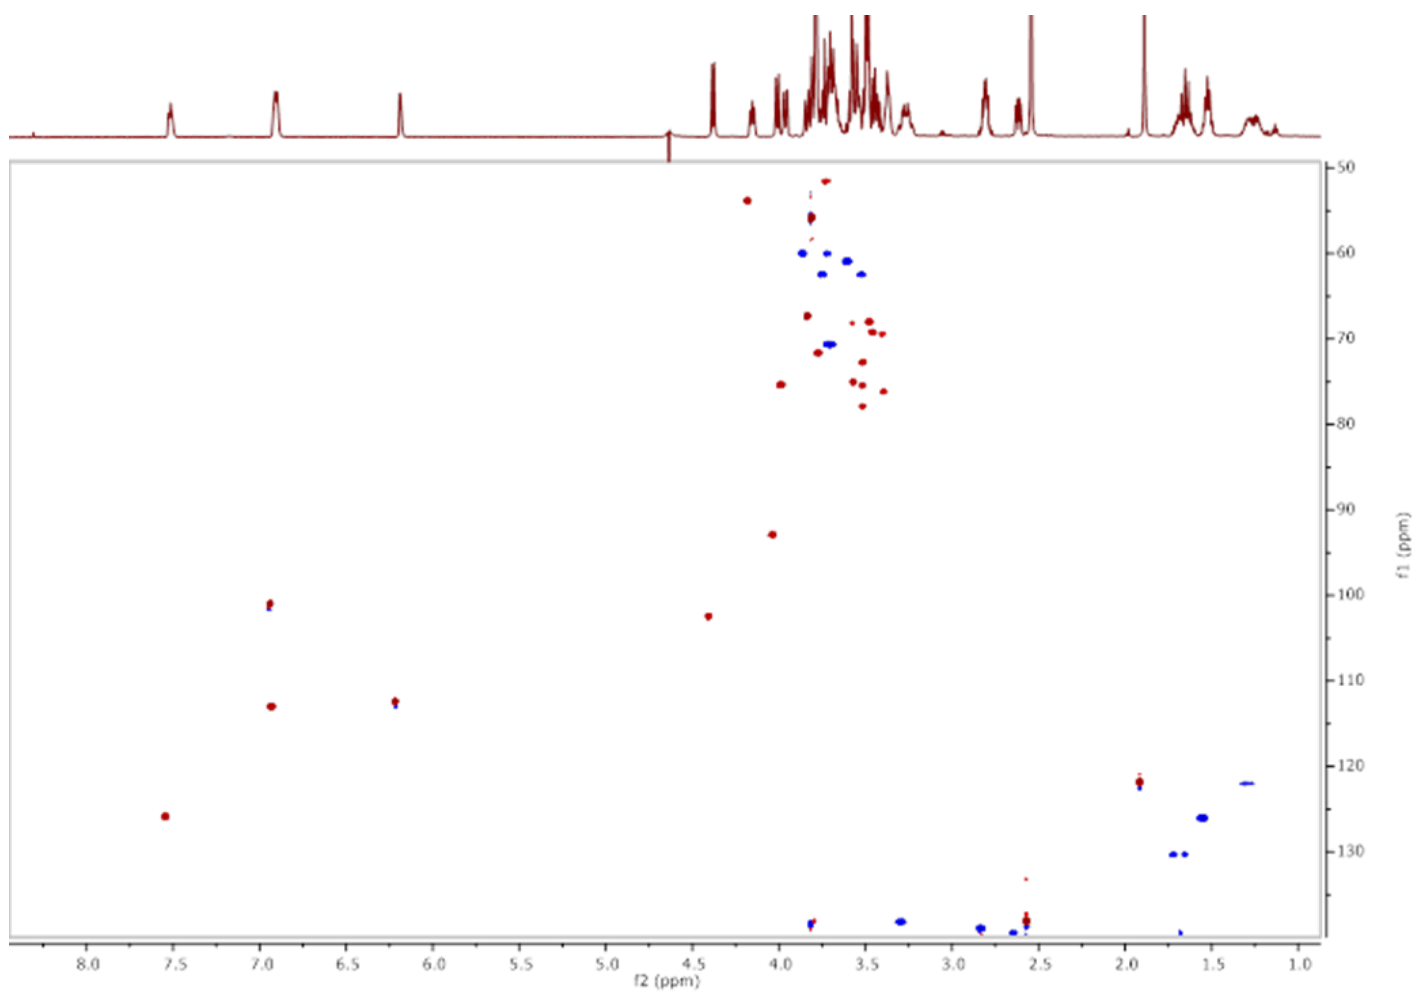

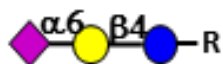

39

$^1\text{H}$  (600 MHz,  $\text{D}_2\text{O}$ ):  $\delta$  (ppm)

|               | H1                            | H2   | H3                       | H4   | H5                 | H6           | H7               | H8   | H9           | NHAc |
|---------------|-------------------------------|------|--------------------------|------|--------------------|--------------|------------------|------|--------------|------|
| <b>Glc</b>    | 4.01<br>(d, $J = 9.2$ Hz, 1H) | 3.41 | 3.51                     | 3.74 | 3.45               | 3.84<br>3.46 | - <sup>[b]</sup> | -    | -            | -    |
| <b>Gal</b>    | 4.28<br>(d, $J = 7.9$ Hz, 1H) | 3.39 | 3.51                     | 3.78 | n/a <sup>[a]</sup> | 3.84<br>3.46 | -                | -    | -            | -    |
| <b>Neu5Ac</b> | -                             | -    | 2.57 - eq<br>1.57 -axial | 3.50 | 3.66               | 3.55         | n/a              | 3.42 | 3.72<br>3.50 | 1.88 |

|                           |                                             |
|---------------------------|---------------------------------------------|
| <b>N-CH<sub>3</sub></b>   | 2.56                                        |
| <b>N-O-CH<sub>2</sub></b> | 3.70                                        |
| <b>CH<sub>2</sub>-NH</b>  | 3.28<br>(ddd, $J = 20.4, 10.4, 4.2$ Hz, 2H) |
| <b>C(O)-CH-NH</b>         | 4.16<br>(dd, $J = 8.8, 5.9$ Hz, 1H)         |
| <b>A</b>                  | 1.70<br>1.64                                |
| <b>B</b>                  | 1.28                                        |
| <b>C</b>                  | 1.53                                        |
| <b>D</b>                  | 2.81                                        |
| <b>E</b>                  | 3.80                                        |
| <b>F</b>                  | 7.53<br>(d, $J = 8.5$ Hz, 1H)               |
| <b>G</b>                  | 6.92                                        |
| <b>H</b>                  | 6.92                                        |
| <b>I</b>                  | 6.19                                        |
| <b>O-CH<sub>3</sub></b>   | 3.79                                        |

<sup>[a]</sup> Not assigned

<sup>[b]</sup> Not applicable

$^{13}\text{C}$  from HSQC (150 MHz,  $\text{D}_2\text{O}$ ):  $\delta$  (ppm). 125.80, 100.89, 112.99, 112.26, 102.99, 53.80, 93.13, 63.26, 60.09, 55.68, 68.26, 71.60, 62.45, 51.56, 70.55, 73.50, 72.21, 75.66, 68.14, 72.15, 68.12, 79.50, 68.35, 70.48, 75.85, 38.24, 39.02, 39.78, 38.27, 22.69, 30.27, 26.18, 22.03.

MALDI TOF-MS  $m/z$  calcd for  $\text{C}_{44}\text{H}_{66}\text{N}_5\text{O}_{24}\text{Na}_2$  ( $\text{M} + 2\text{Na}$ )<sup>+</sup> exact 1094.3899, found 1094.3593.

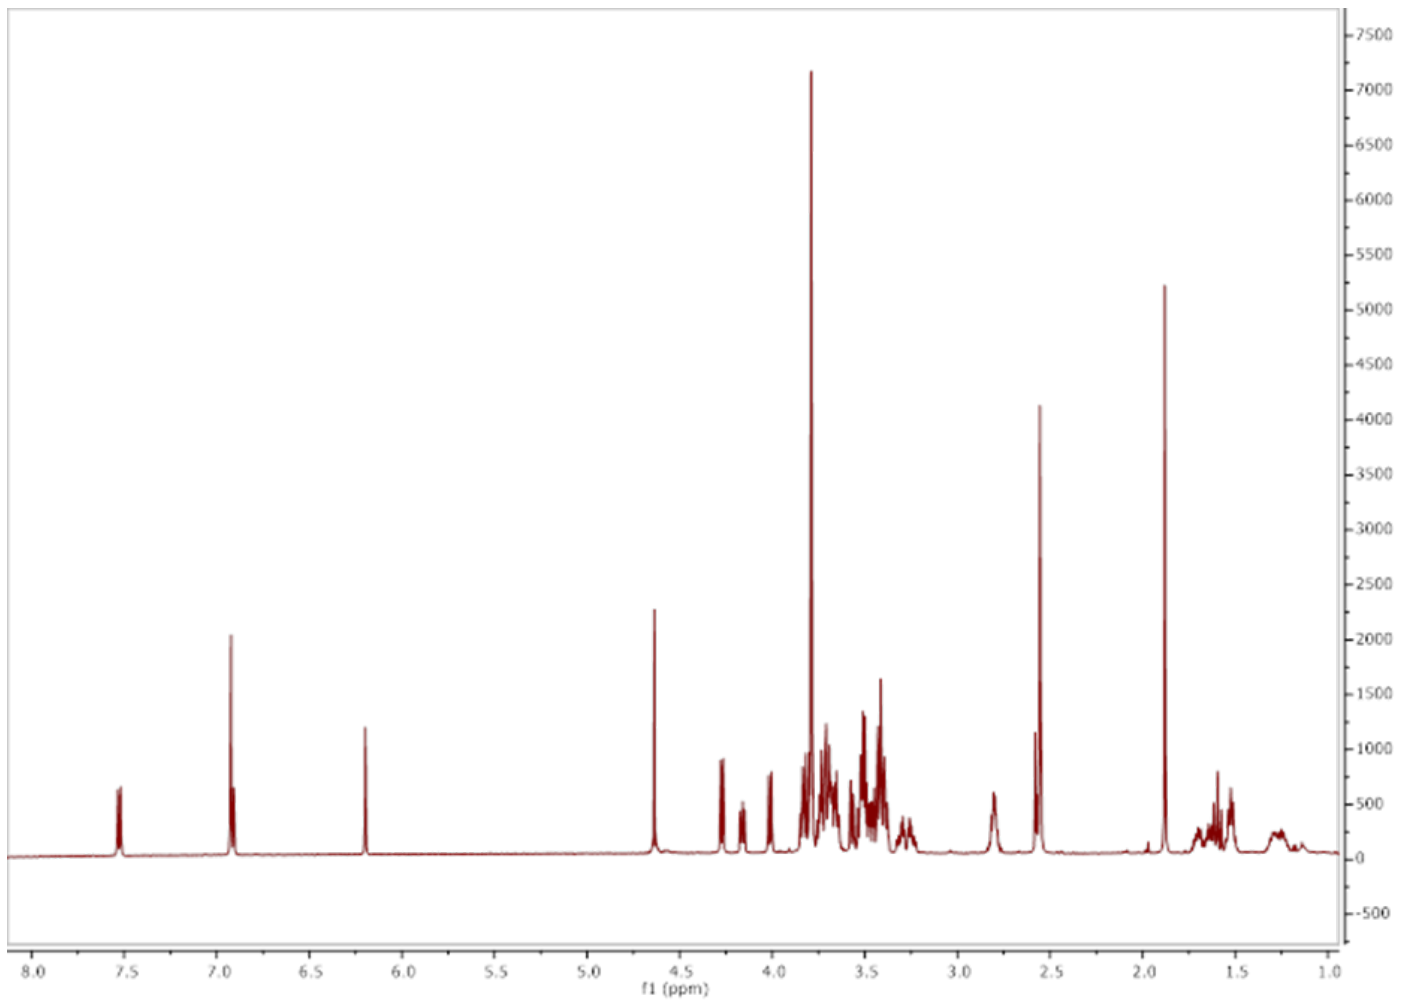



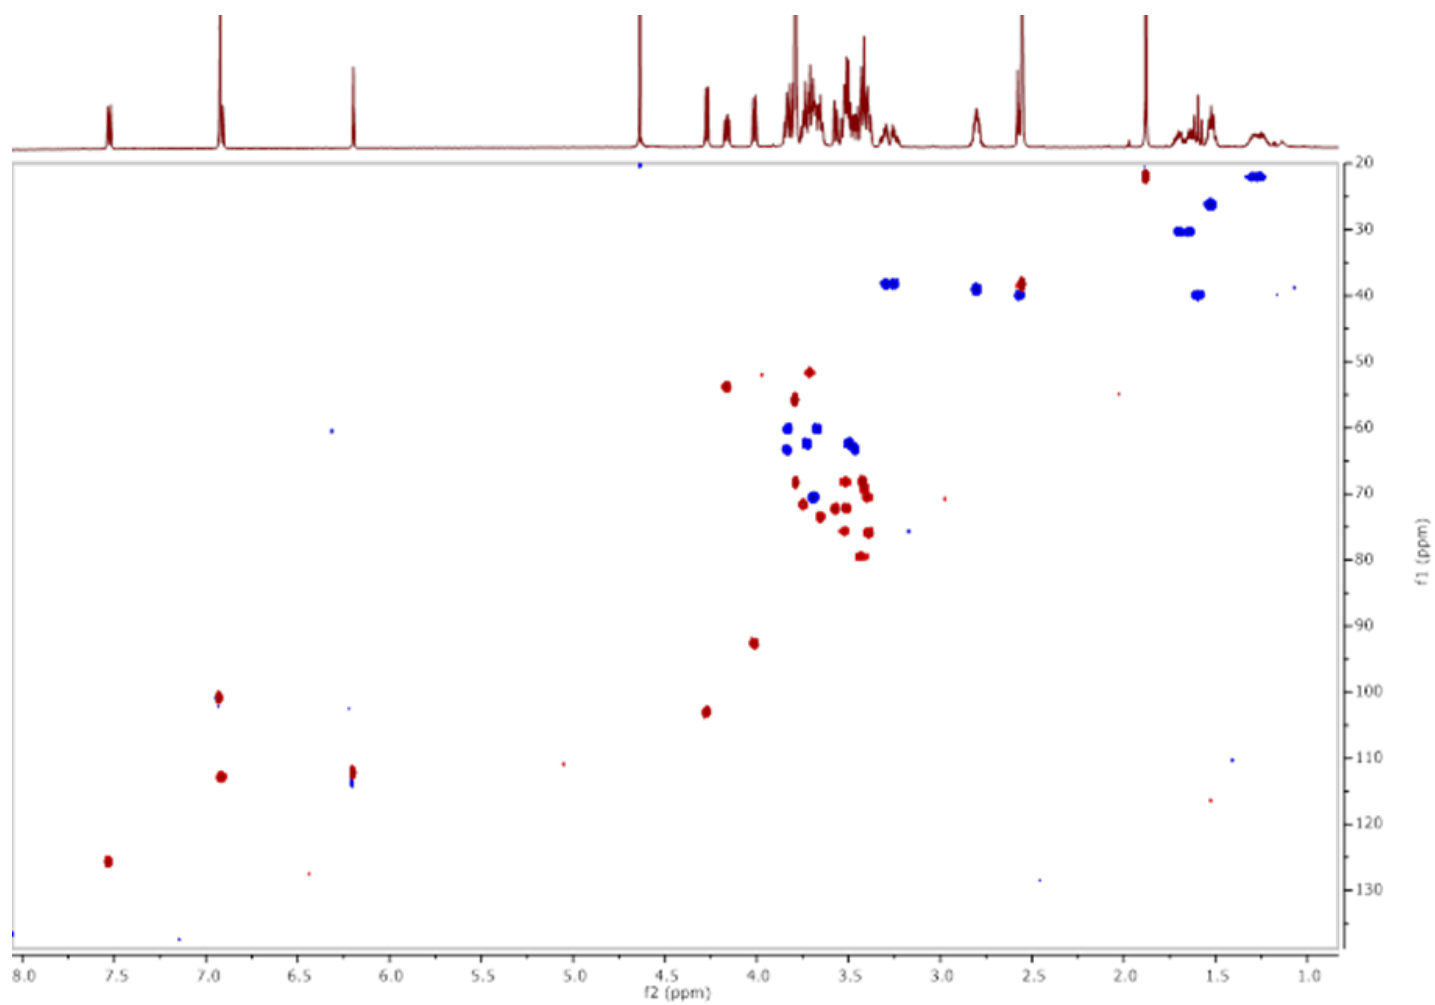

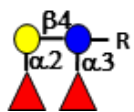

40

$^1\text{H}$  (600 MHz,  $\text{D}_2\text{O}$ ):  $\delta$  (ppm)

|               | H1                            | H2   | H3   | H4   | H5                 | H6  | $\text{CH}_3$ |
|---------------|-------------------------------|------|------|------|--------------------|-----|---------------|
| <b>Glc</b>    | 4.00<br>(d, $J = 8.0$ Hz, 1H) | 3.63 | 3.26 | 3.71 | n/a <sup>[a]</sup> | n/a | -             |
| <b>Gal</b>    | 4.37<br>(d, $J = 7.4$ Hz, 1H) | 3.51 | n/a  | 3.72 | n/a                | n/a | -             |
| <b>Fuc(1)</b> | 5.12                          | 3.68 | n/a  | n/a  | 4.14               | -   | 1.14          |
| <b>Fuc(2)</b> | 5.35                          | 3.68 | 3.87 | n/a  | 4.75               | -   | 1.14          |

$^{13}\text{C}$  from BSHSQC (150 MHz,  $\text{D}_2\text{O}$ ):  $\delta$  (ppm)

|               | C1     |
|---------------|--------|
| <b>Glc</b>    | 93.27  |
| <b>Gal</b>    | 100.13 |
| <b>Fuc(1)</b> | 99.32  |
| <b>Fuc(2)</b> | 98.25  |

<sup>[a]</sup> Not assigned

<sup>[b]</sup> Not applicable

MALDI TOF-MS  $m/z$  calcd for  $\text{C}_{45}\text{H}_{70}\text{N}_4\text{O}_{24}\text{Na}$  ( $\text{M} + \text{Na}$ )<sup>+</sup> exact 1073.4278, found 1073.8154.

ARP-VI-37\_PRESAT\_20141010\_01  
ARP-VI-37

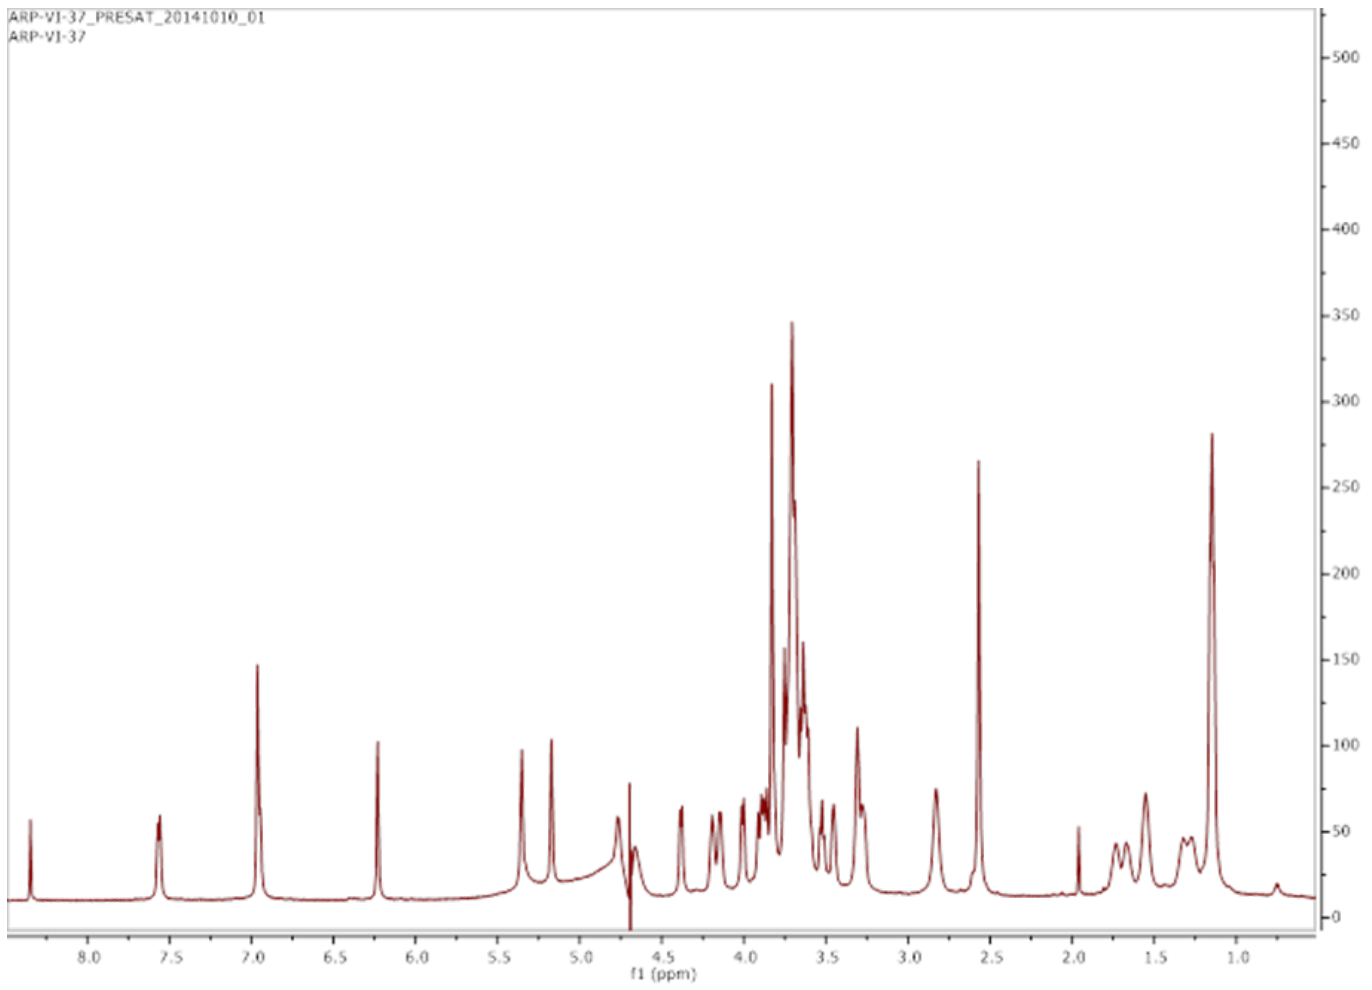

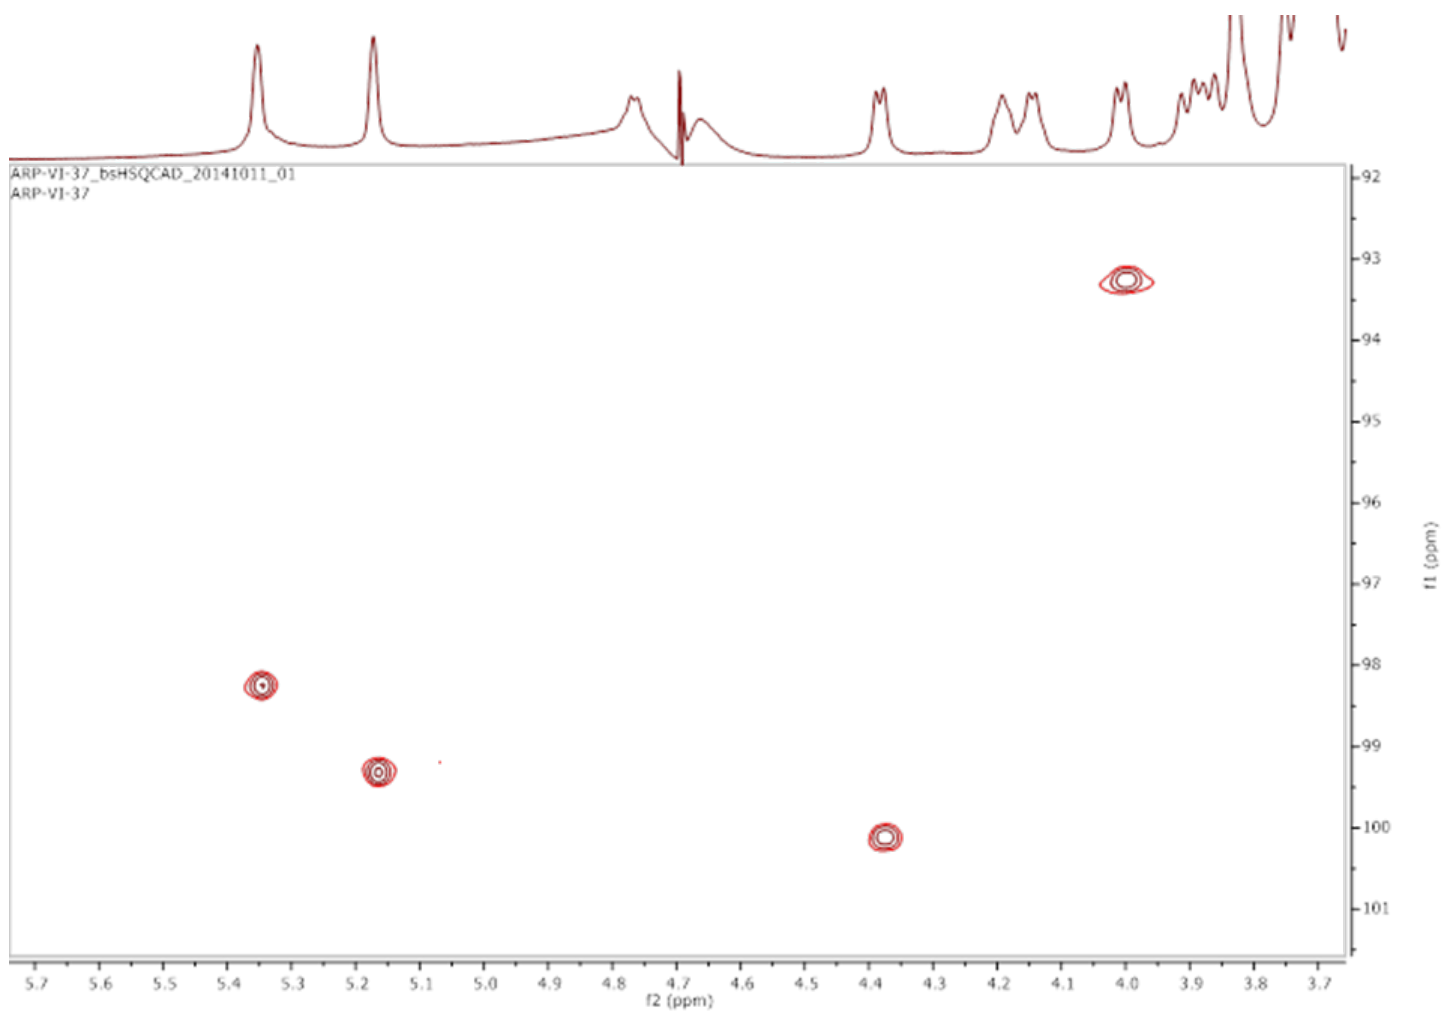

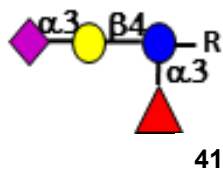

$^1\text{H}$  (600 MHz,  $\text{D}_2\text{O}$ ):  $\delta$  (ppm)

|               | H1                             | H2   | H3                                                       | H4                                  | H5                 | H6  | NHAc | CH <sub>3</sub>               |
|---------------|--------------------------------|------|----------------------------------------------------------|-------------------------------------|--------------------|-----|------|-------------------------------|
| <b>Glc</b>    | 4.00<br>(d, $J = 9.1$ Hz, 1H)  | 3.58 | 3.63                                                     | 3.69                                | n/a <sup>[a]</sup> | n/a | -    | -                             |
| <b>Gal</b>    | 4.33<br>(d, $J = 7.79$ Hz, 1H) | 3.35 | 3.77                                                     | 3.92<br>(dd, $J = 9.8, 2.9$ Hz, 1H) | n/a                | n/a | -    | -                             |
| <b>Neu5Ac</b> | -                              | -    | 2.61 -eq<br>(dd, $J = 12.4, 4.5$ Hz, 1H)<br>1.63 - axial | 3.52                                | 3.68               | n/a | 1.86 | -                             |
| <b>Fuc</b>    | 5.27<br>(d, $J = 3.9$ Hz, 1H)  | 3.63 | 3.80                                                     | 3.60                                | 4.66               | -   | -    | 1.02<br>(d, $J = 6.6$ Hz, 3H) |

$^{13}\text{C}$  from BSHSQC (150 MHz,  $\text{D}_2\text{O}$ ):  $\delta$  (ppm)

|            | C1     |
|------------|--------|
| <b>Glc</b> | 93.10  |
| <b>Gal</b> | 101.47 |
| <b>Fuc</b> | 98.33  |

<sup>[a]</sup> Not assigned

<sup>[b]</sup> Not applicable

MALDI TOF-MS  $m/z$  calcd for  $\text{C}_{50}\text{H}_{76}\text{N}_5\text{O}_{28} \text{Na}_2$  ( $\text{M} + 2\text{Na}$ )<sup>+</sup> exact 1240.4478, found 1240.3639.

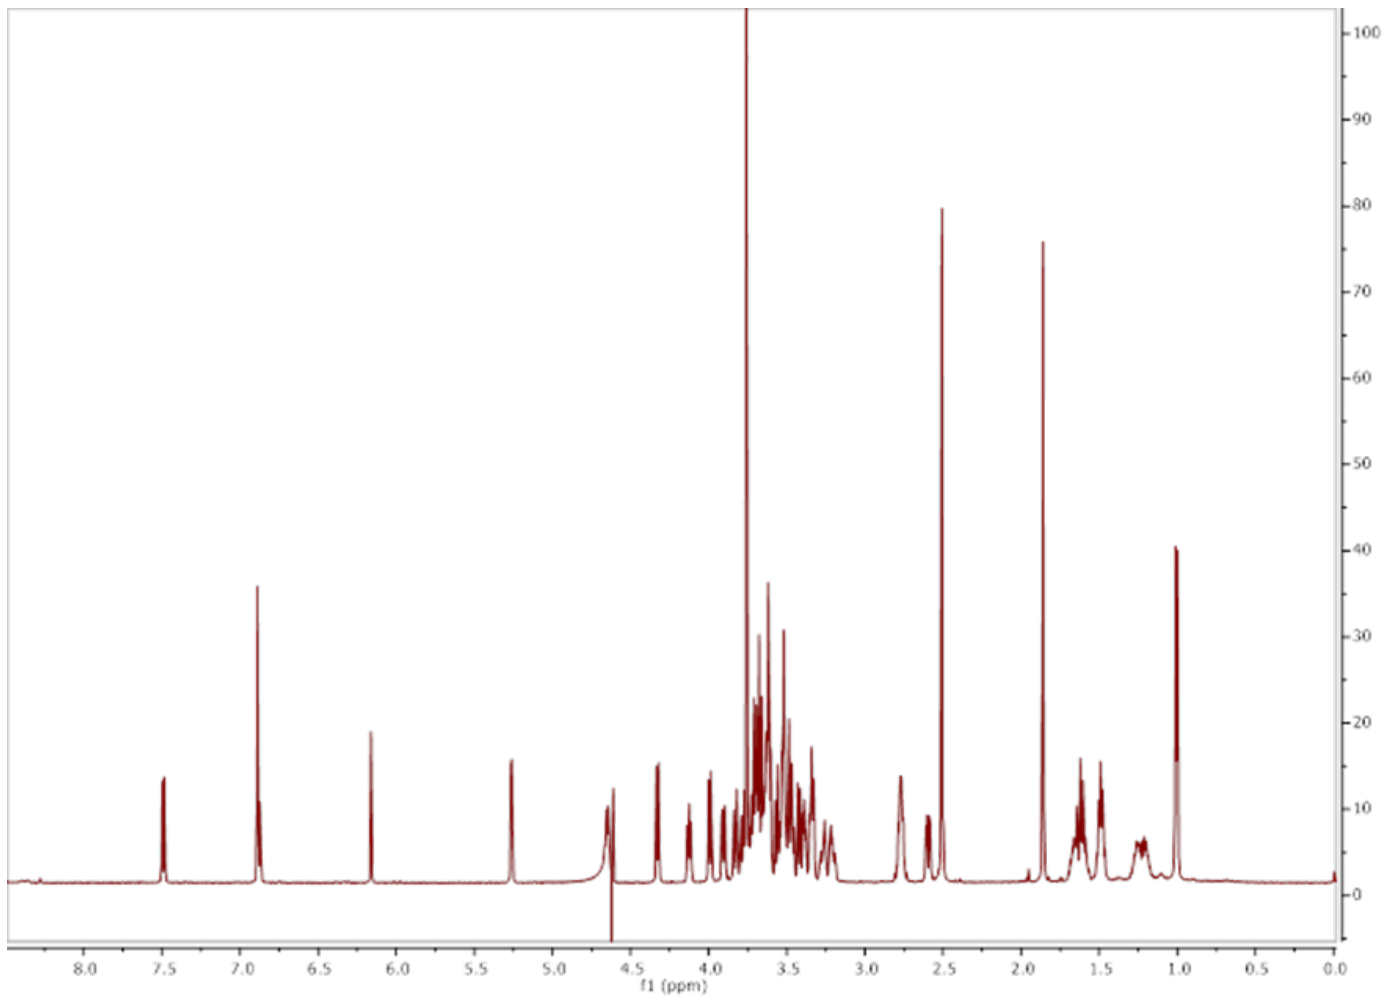

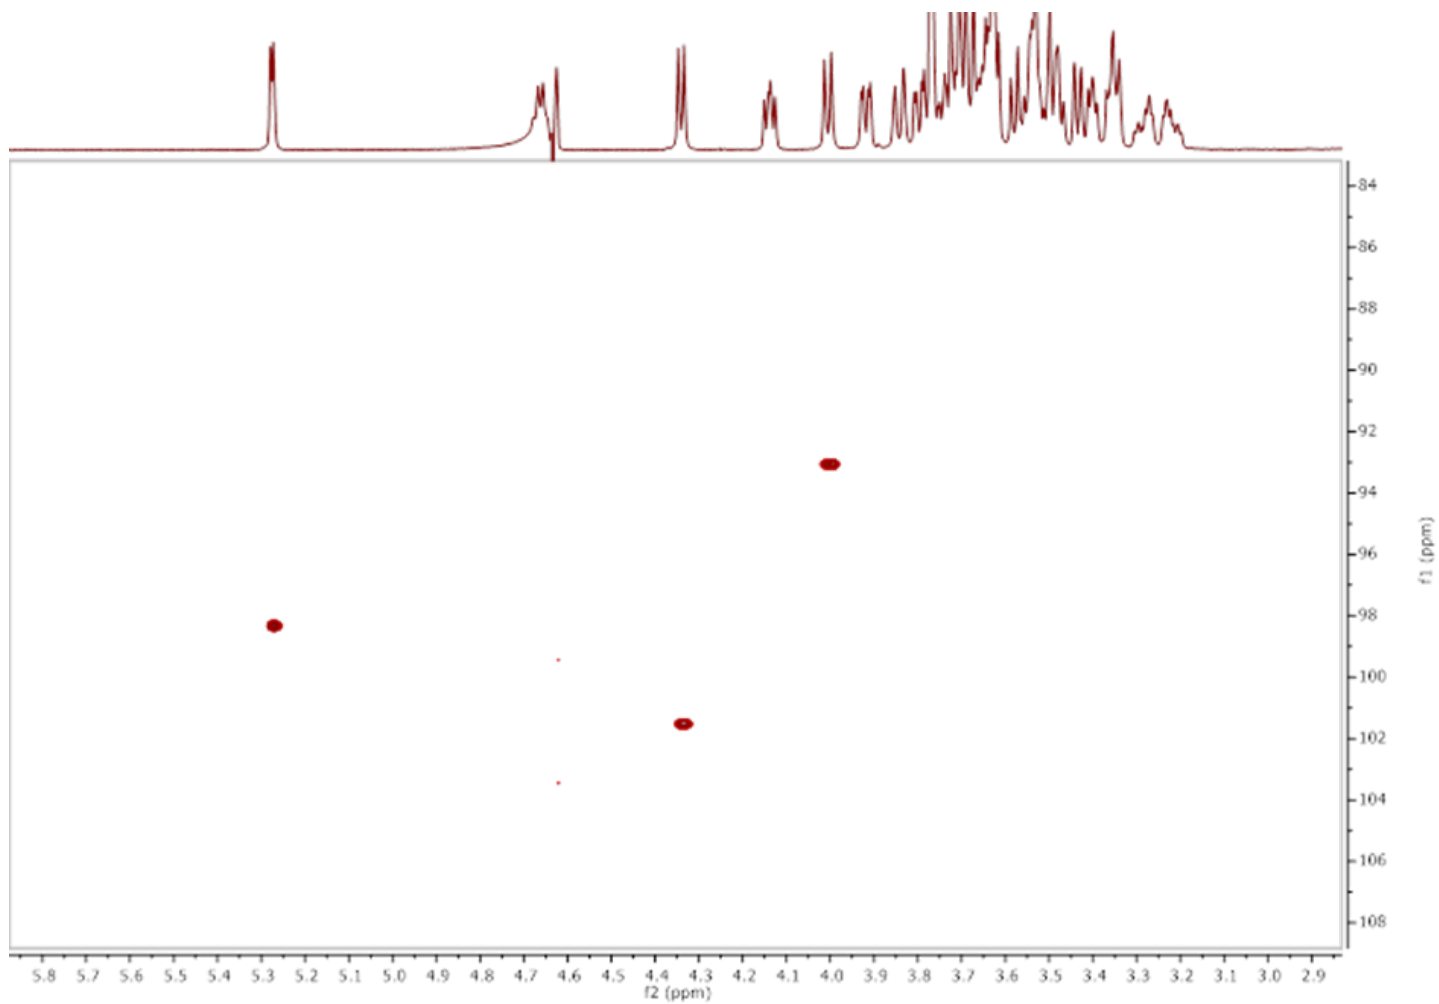

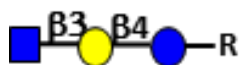

42

$^1\text{H}$  (600 MHz,  $\text{D}_2\text{O}$ ):  $\delta$  (ppm)

|               | H1                            | H2   | H3   | H4   | H5   | H6               | NHAc               |
|---------------|-------------------------------|------|------|------|------|------------------|--------------------|
| <b>Glc</b>    | 4.03                          | 3.39 | 3.46 | 3.65 | 3.34 | - <sup>[a]</sup> | n/a <sup>[b]</sup> |
| <b>Gal</b>    | 4.30<br>(d, $J = 7.9$ Hz, 1H) | 3.45 | 3.58 | 4.02 | 3.55 | -                | n/a                |
| <b>GlcNAc</b> | 4.56<br>(d, $J = 8.4$ Hz, 1H) | 3.63 | 3.33 | 3.45 | -    | -                | 1.90               |

<sup>[a]</sup> Not assigned

<sup>[b]</sup> Not applicable

$^{13}\text{C}$  from HSQC (150 MHz,  $\text{D}_2\text{O}$ ):  $\delta$  (ppm) 53.38, 54.64, 54.91, 55.11, 55.38, 55.86, 56.45, 59.59, 59.59, 59.60, 59.86, 59.88, 59.88, 60.36, 60.43, 60.92, 67.77, 68.96, 69.03, 69.11, 69.42, 69.46, 70.24, 70.73, 73.00, 74.35, 75.03, 75.07, 75.13, 75.76, 77.52, 77.98, 81.41, 81.41, 92.47, 92.94, 100.66, 101.43, 102.35, 102.38, 112.56, 112.71, 125.59, 141.22, 141.70, 145.67, 150.02, 150.03, 157.88, 157.89, 157.89, 158.14, 158.72.

MALDI TOF-MS  $m/z$  calcd for  $\text{C}_{41}\text{H}_{63}\text{N}_5\text{O}_{21}\text{Na}$  ( $\text{M} + \text{Na}$ )<sup>+</sup> exact 984.3913, found 984.2182.



ARP-V-11\_PRESAT\_20131115\_01  
ARP-V-11

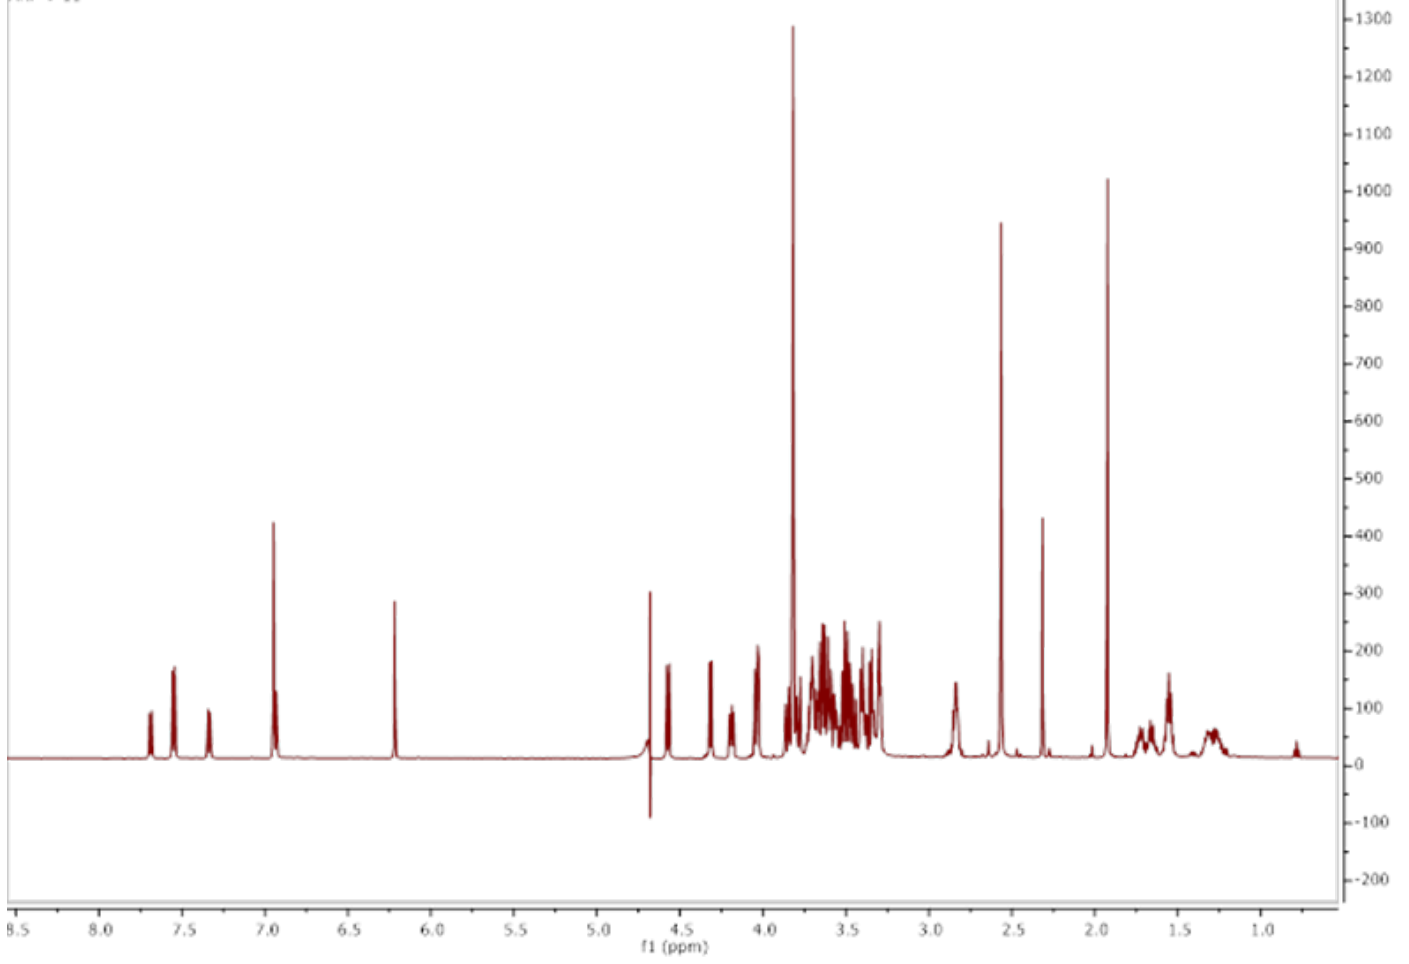

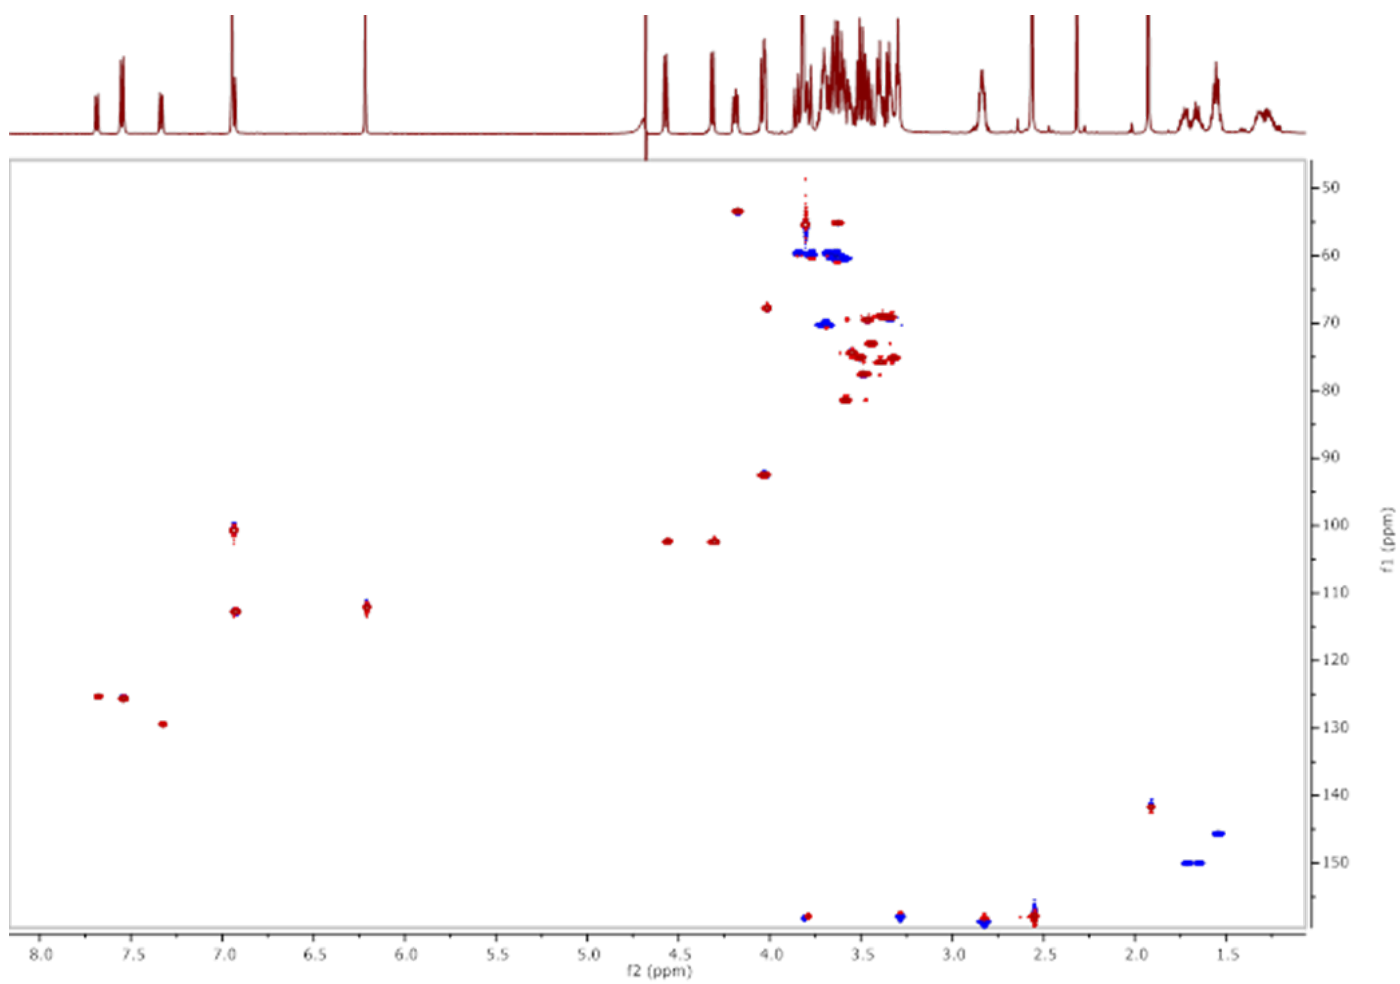

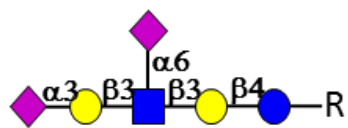

45

$^1\text{H}$  (800 MHz,  $\text{D}_2\text{O}$ ):  $\delta$  (ppm)

|                                          | H1   | H2   | H3                        | H4   | H5   | H6               | H9           | NHAc               |
|------------------------------------------|------|------|---------------------------|------|------|------------------|--------------|--------------------|
| <b>Glc</b>                               | 4.03 | 3.39 | 3.46                      | 3.65 | 3.34 | - <sup>[a]</sup> | n/a          | n/a <sup>[b]</sup> |
| <b>Gal</b>                               | 4.30 | 3.45 | 3.58                      | 4.02 | 3.53 | -                | n/a          | n/a                |
| <b>GlcNAc</b>                            | 4.58 | 3.76 | 3.67                      | 3.43 | 3.34 | -                | n/a          | 1.90<br>(s, 9H)    |
| <b>Gal(2)</b>                            | 4.37 | 3.41 | 3.80                      | 3.95 | 3.54 | -                | n/a          | n/a                |
| <b>Neu5Ac<br/><math>\alpha</math>2,3</b> | n/a  | n/a  | 2.63 – eq<br>1.64 - axial | 3.54 | -    | -                | 3.75<br>3.52 | 1.90<br>(s, 9H)    |
| <b>Neu5Ac<br/><math>\alpha</math>2,6</b> | n/a  | n/a  | 2.63 – eq<br>1.64 - axial | 3.54 | -    | -                | 3.75<br>3.52 | 1.90<br>(s, 9H)    |

$^{13}\text{C}$  (200 MHz,  $\text{D}_2\text{O}$ ):  $\delta$  (ppm)

|               | C1     |
|---------------|--------|
| <b>Glc</b>    | 92.87  |
| <b>Gal</b>    | 102.79 |
| <b>GlcNAc</b> | 102.47 |
| <b>Gal(2)</b> | 103.34 |

<sup>[a]</sup> Not assigned

<sup>[b]</sup> Not applicable

MALDI TOF-MS  $m/z$  calcd for  $\text{C}_{69}\text{H}_{105}\text{N}_7\text{O}_{42}\text{Na}$  ( $\text{M} - 2\text{H} + \text{Na}$ )<sup>-</sup> exact 1726.6193, found 1726.4392.

ARP-VI-65\_PRESAT\_20141016\_01  
ARP-VI-65

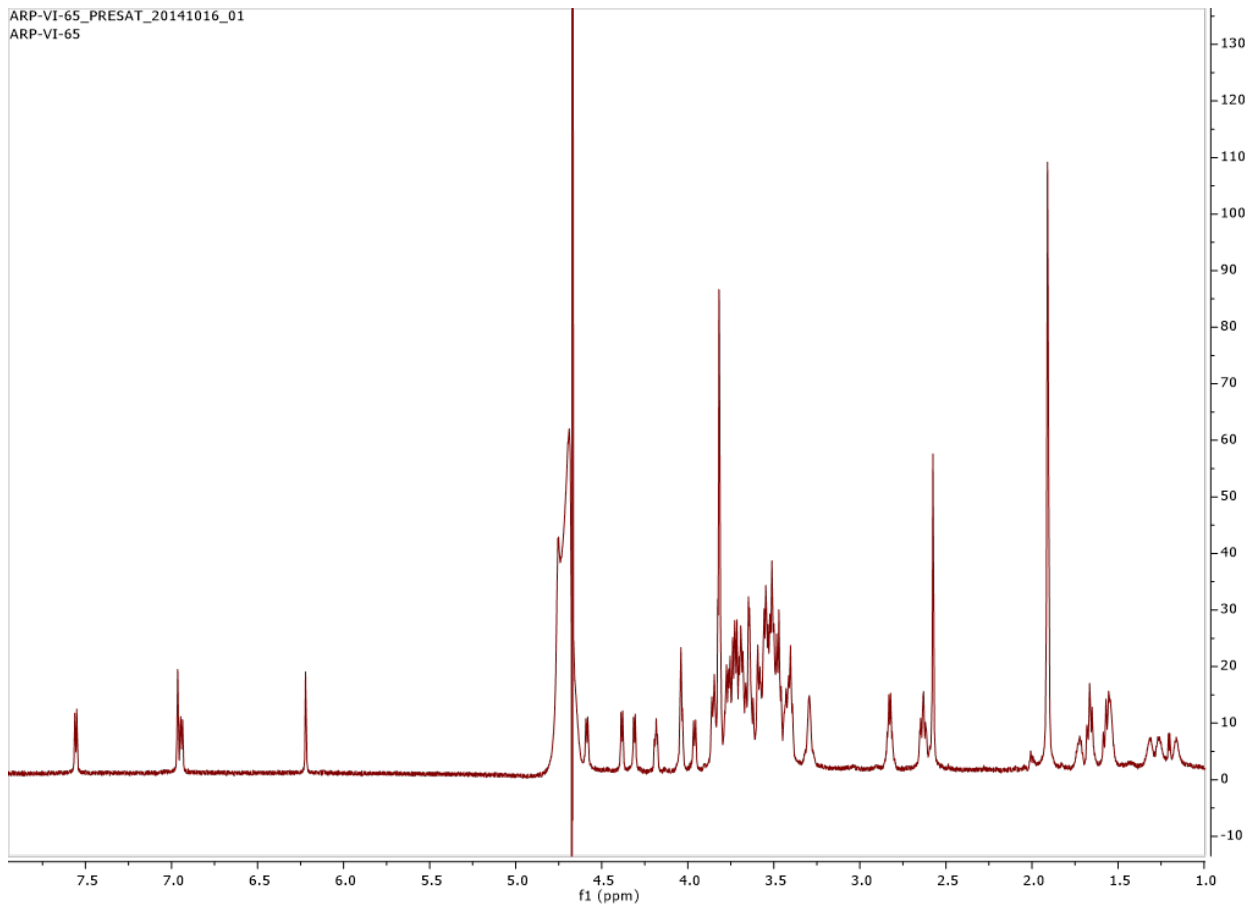

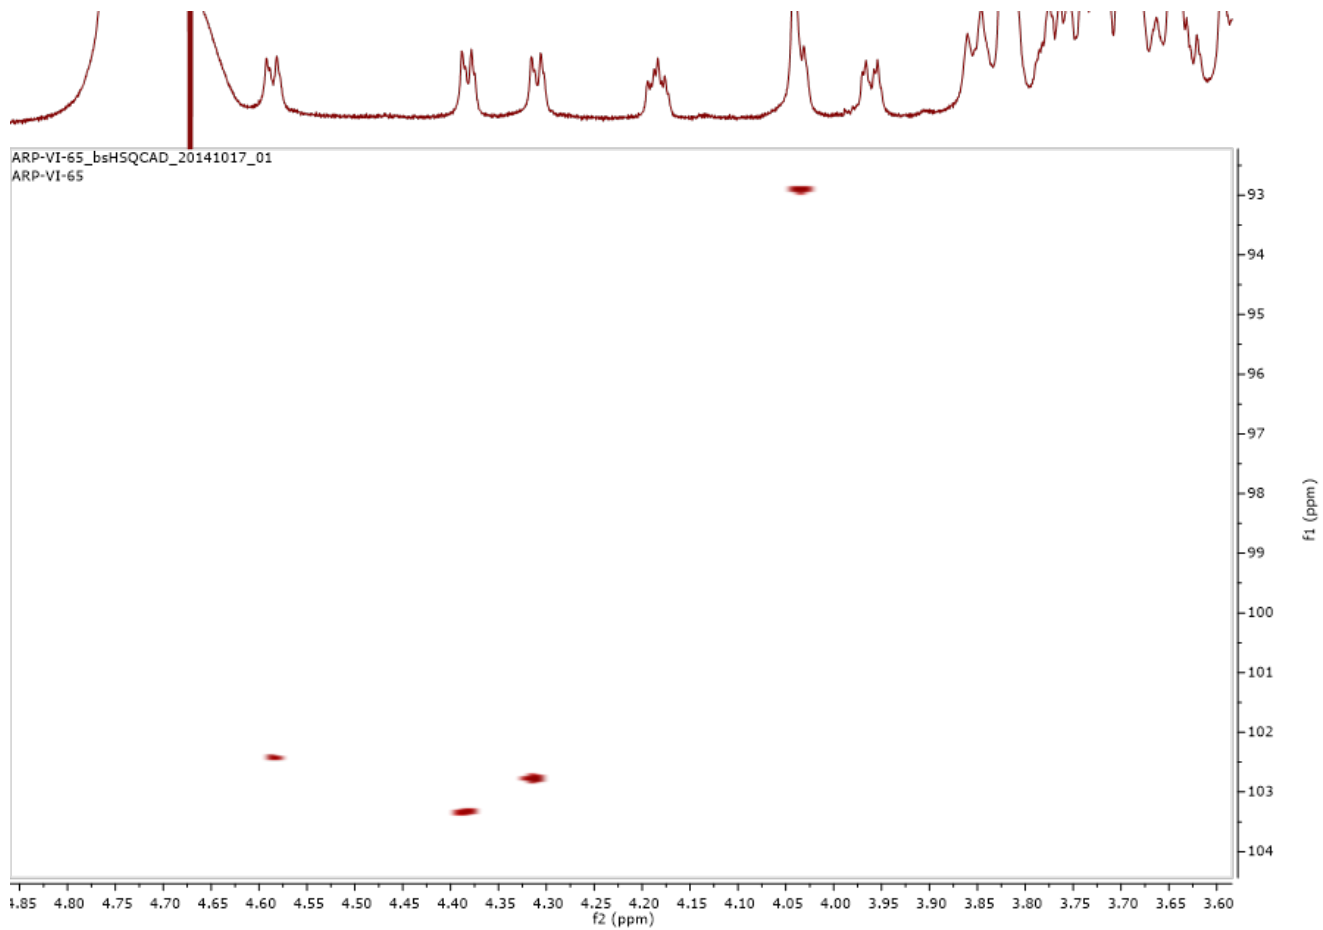

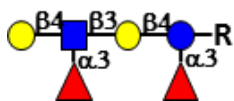

46

$^1\text{H}$  (600 MHz,  $\text{D}_2\text{O}$ ):  $\delta$  (ppm)

|               | H1                            | H2   | H3   | H4   | H5                 | H6  | $\text{CH}_3$    | NHAc |
|---------------|-------------------------------|------|------|------|--------------------|-----|------------------|------|
| <b>Glc</b>    | 4.00<br>(d, $J = 8.8$ Hz, 1H) | 3.59 | 3.34 | 3.64 | n/a <sup>[a]</sup> | n/a | - <sup>[b]</sup> | -    |
| <b>Gal</b>    | 4.25<br>(d, $J = 7.1$ Hz, 1H) | 3.31 | 3.53 | 3.93 | 3.39               | n/a | -                | -    |
| <b>GlcNAc</b> | 4.54<br>(d, $J = 7.9$ Hz, 1H) | 3.81 | 3.87 | 3.49 | n/a                | n/a | -                | 1.85 |
| <b>Gal(2)</b> | 4.31<br>(d, $J = 7.5$ Hz, 1H) | 3.32 | 3.49 | 3.74 | 3.45               | n/a | -                | -    |
| <b>Fuc</b>    | 5.25                          | 3.61 | 3.79 | 3.61 | 4.67               | -   | 1.01             | -    |
| <b>Fuc(2)</b> | 4.95                          | 3.52 | 3.75 | 3.61 | 4.67               | n/a | 1.01             | -    |

$^{13}\text{C}$  from BSHSQC (150 MHz,  $\text{D}_2\text{O}$ ):  $\delta$  (ppm)

|               | C1     |
|---------------|--------|
| <b>Glc</b>    | 92.73  |
| <b>Gal</b>    | 101.29 |
| <b>GlcNAc</b> | 102.17 |
| <b>Gal(2)</b> | 101.37 |
| <b>Fuc</b>    | 98.12  |
| <b>Fuc(2)</b> | 98.17  |

<sup>[a]</sup> Not assigned

<sup>[b]</sup> Not applicable

MALDI TOF-MS  $m/z$  calcd  $\text{C}_{59}\text{H}_{93}\text{N}_5\text{O}_{34}\text{Na}$  ( $\text{M} + \text{Na}$ )<sup>+</sup> exact 1438.5600, found 1438.3550.

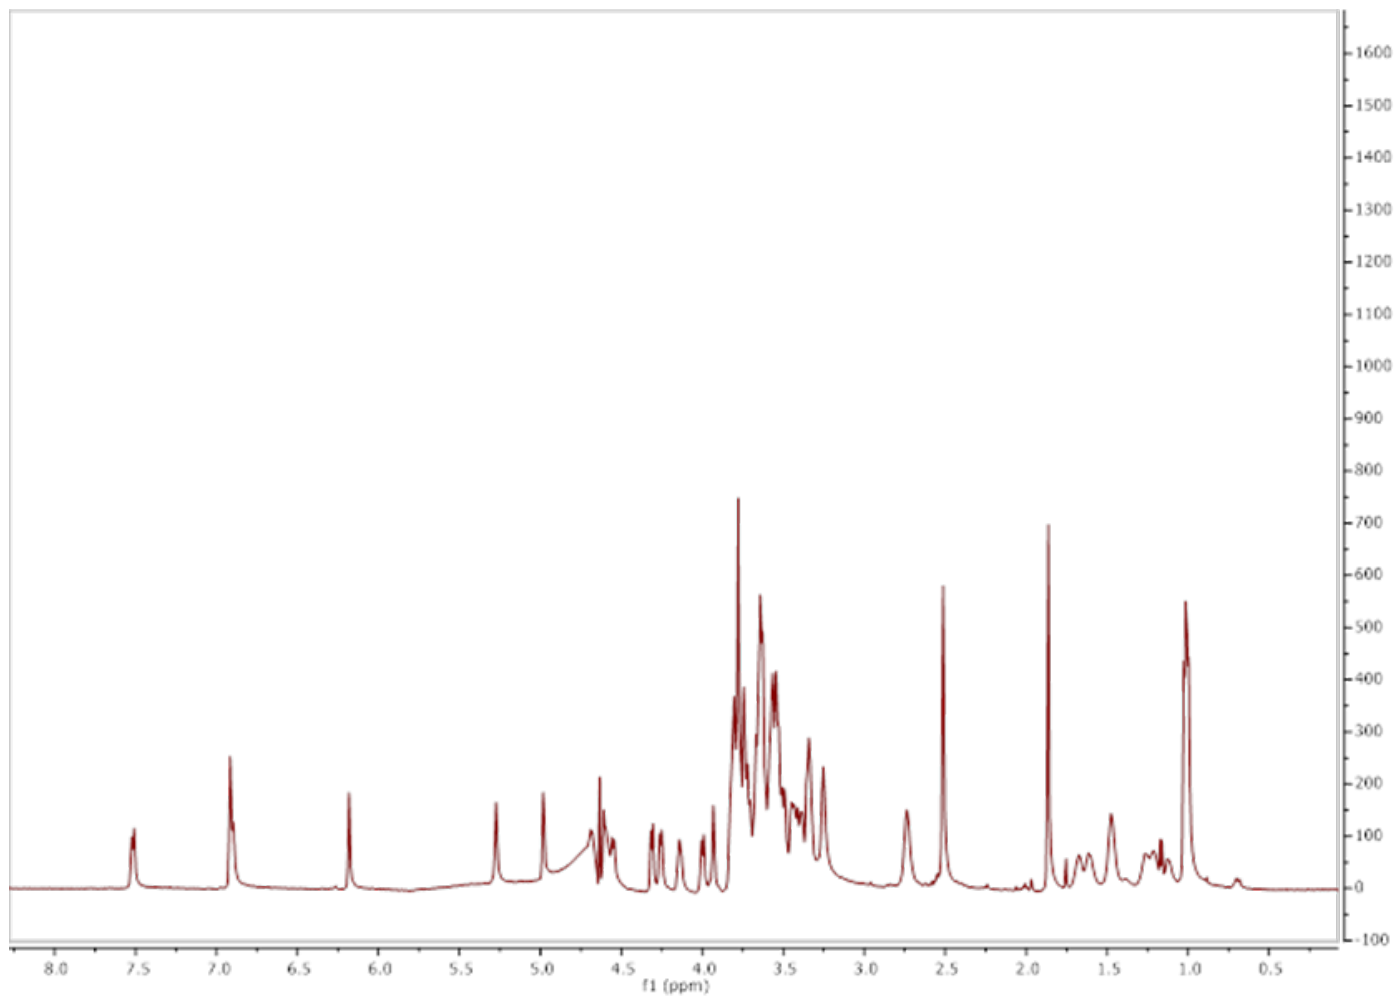

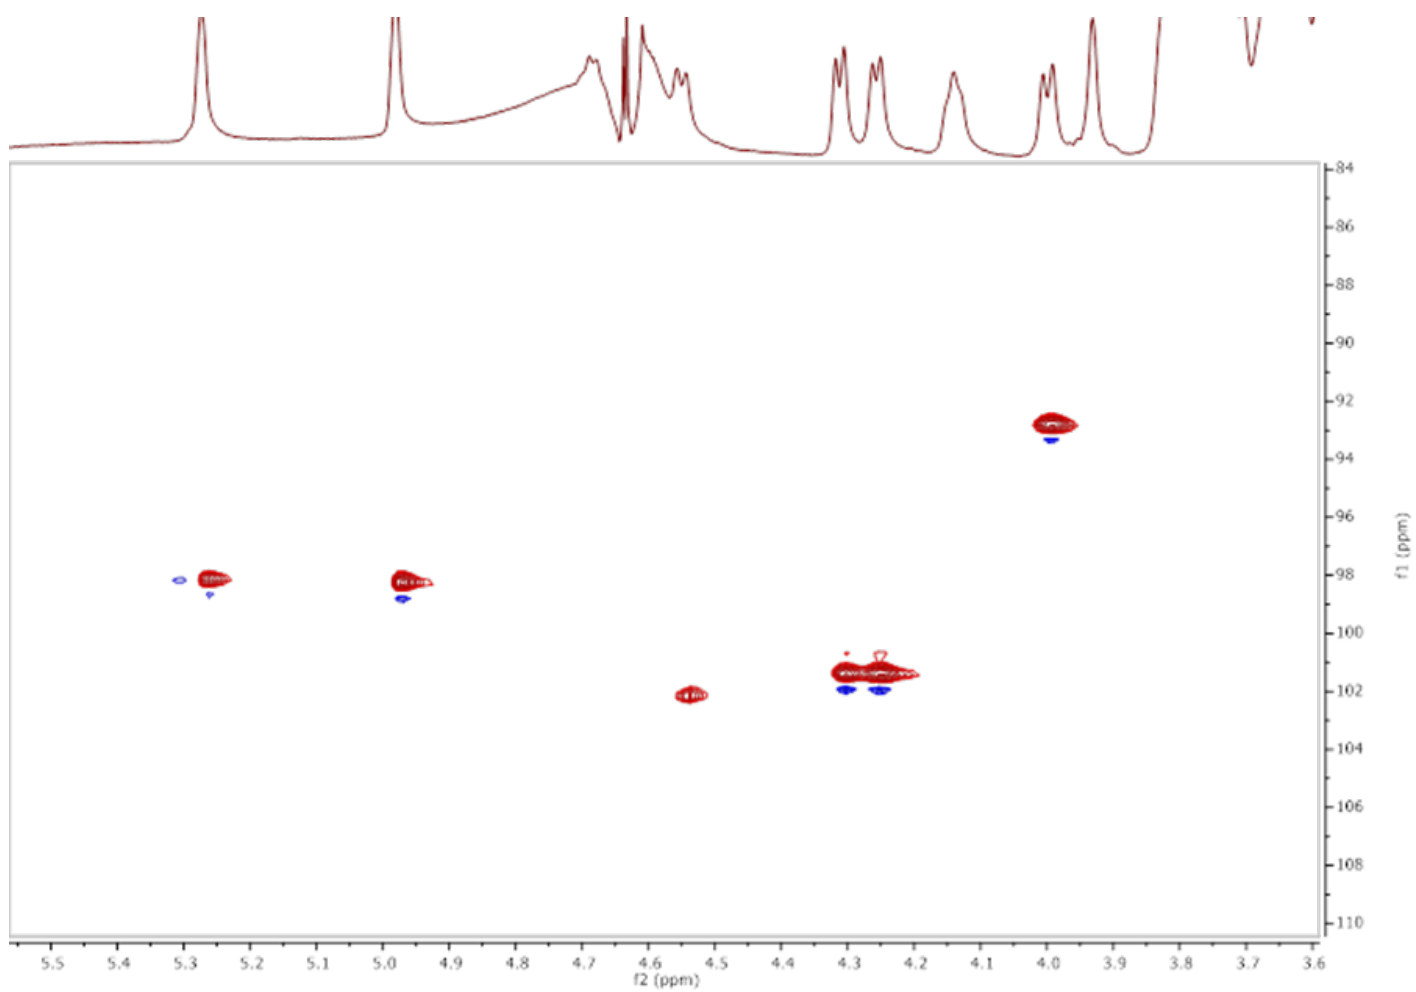



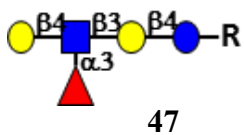

$^1\text{H}$  (600 MHz,  $\text{D}_2\text{O}$ ):  $\delta$  (ppm)

|               | H1                            | H2   | H3   | H4   | H5                 | H6  | $\text{CH}_3$                 | NHAc            |
|---------------|-------------------------------|------|------|------|--------------------|-----|-------------------------------|-----------------|
| <b>Glc</b>    | 4.00                          | 3.35 | 3.54 | 3.46 | n/a <sup>[a]</sup> | n/a | - <sup>[b]</sup>              | -               |
| <b>Gal</b>    | 4.27<br>(d, $J = 7.9$ Hz, 1H) | 3.42 | 3.54 | 3.98 | n/a                | n/a | -                             | -               |
| <b>GlcNAc</b> | 4.56<br>(d, $J = 7.9$ Hz, 1H) | 3.80 | 3.72 | 3.42 | n/a                | n/a | -                             | 1.86<br>(s, 3H) |
| <b>Gal(2)</b> | 4.30<br>(d, $J = 7.7$ Hz, 1H) | 3.33 | 3.49 | 3.73 | n/a                | n/a | -                             | -               |
| <b>Fuc</b>    | 4.98<br>(d, $J = 3.4$ Hz, 1H) | 3.53 | 3.74 | 3.63 | 4.67               | -   | 1.02<br>(d, $J = 6.4$ Hz, 3H) | -               |

$^{13}\text{C}$  from BSHSQC (150 MHz,  $\text{D}_2\text{O}$ ):  $\delta$  (ppm)

|               | C1     |
|---------------|--------|
| <b>Glc</b>    | 92.73  |
| <b>Gal</b>    | 102.66 |
| <b>GlcNAc</b> | 103.38 |
| <b>Gal(2)</b> | 101.51 |
| <b>Fuc</b>    | 93.30  |

<sup>[a]</sup> Not assigned

<sup>[b]</sup> Not applicable

MALDI TOF-MS  $m/z$  calcd  $\text{C}_{53}\text{H}_{83}\text{N}_5\text{O}_{30}\text{Na}$  ( $\text{M} + \text{Na}$ )<sup>+</sup> exact 1292.5021, found 1292.3600.

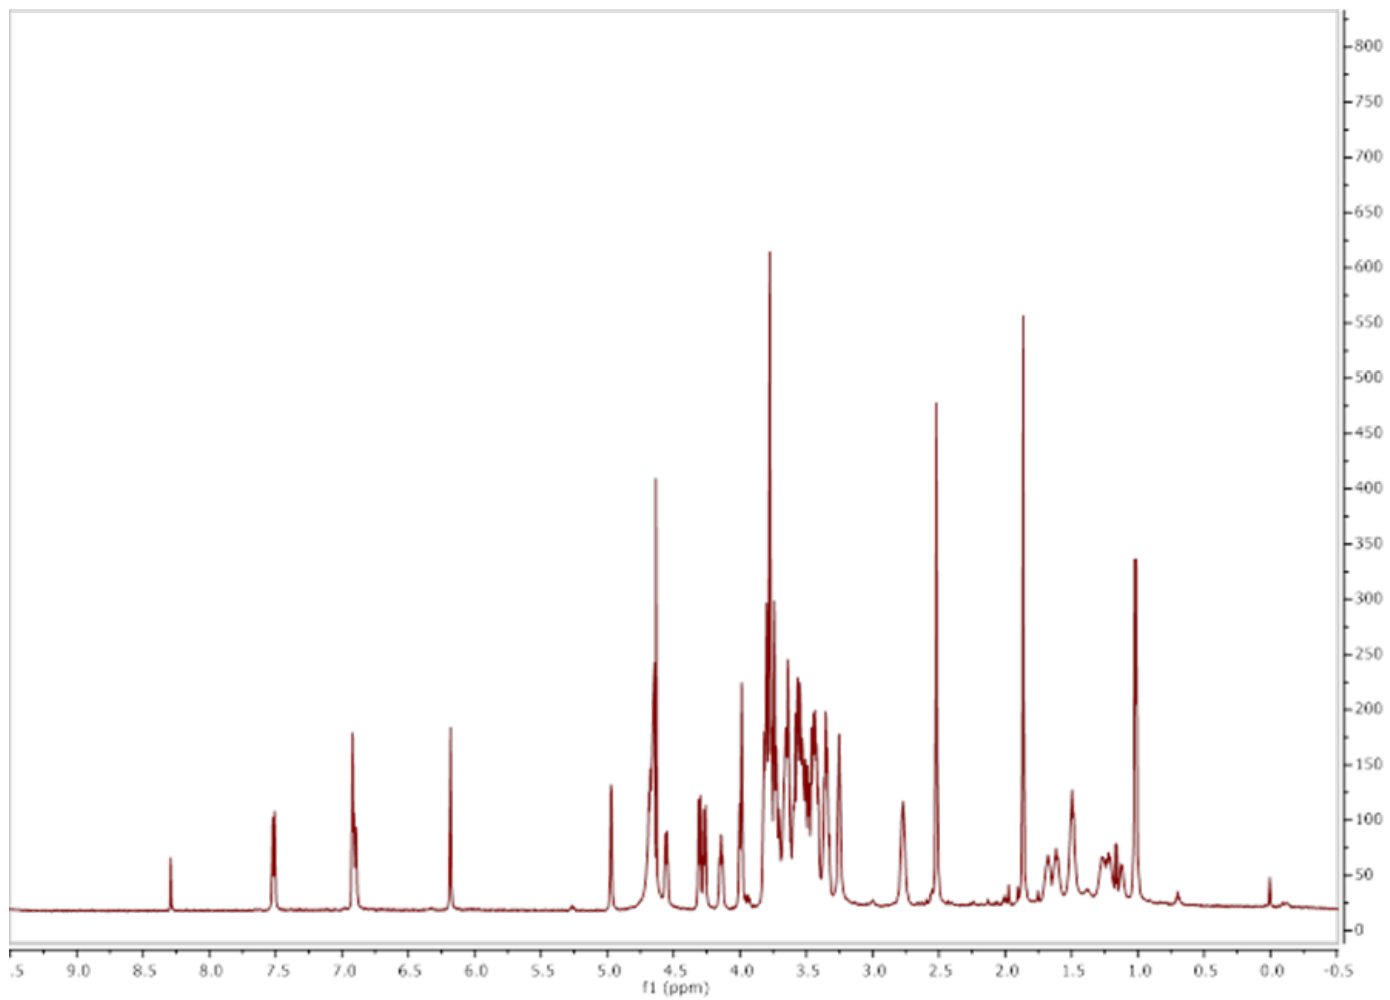

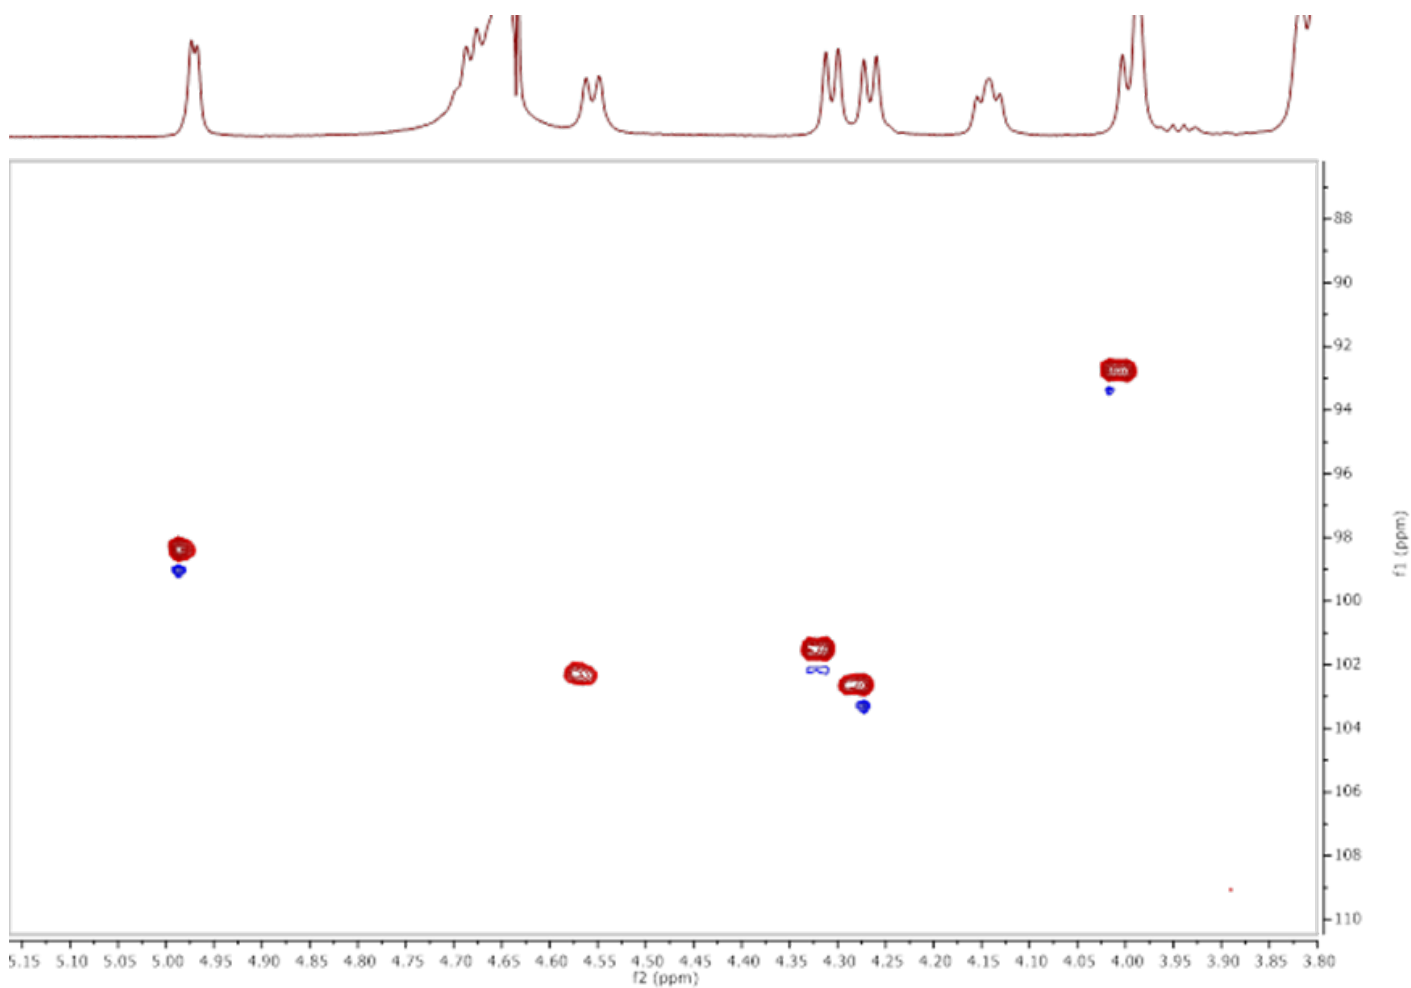

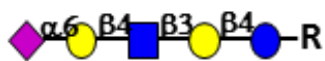

48

$^1\text{H}$  (600 MHz,  $\text{D}_2\text{O}$ ):  $\delta$  (ppm)

|               | H1                            | H2   | H3                                                   | H4                 | H5   | H6   | H9        | NHAc              |
|---------------|-------------------------------|------|------------------------------------------------------|--------------------|------|------|-----------|-------------------|
| <b>Glc</b>    | 4.00                          | 3.57 | 3.46                                                 | n/a <sup>[a]</sup> | n/a  | n/a  | -         | -                 |
| <b>Gal</b>    | 4.28<br>(d, $J = 7.9$ Hz, 1H) | 3.45 | 3.56                                                 | 3.99               | n/a  | n/a  | -         | -                 |
| <b>GlcNAc</b> | 4.58<br>(d, $J = 7.5$ Hz, 1H) | 3.65 | 3.51                                                 |                    | n/a  | n/a  | -         | 1.90 – 1.85<br>6H |
| <b>Gal(2)</b> | 4.30<br>(d, $J = 7.9$ Hz, 1H) | 3.83 | 3.52                                                 | 3.78               | n/a  | n/a  | -         | -                 |
| <b>Neu5Ac</b> | -                             | -    | 2.52 - eq<br>1.55 - axial<br>(dd, $J = 12.2$ Hz, 1H) | 3.50               | 3.66 | 3.55 | 3.72 3.49 | 1.90 – 1.85<br>6H |

$^{13}\text{C}$  from BSHSQC (150 MHz,  $\text{D}_2\text{O}$ ):  $\delta$  (ppm)

|               | C1     |
|---------------|--------|
| <b>Glc</b>    | 92.89  |
| <b>Gal</b>    | 102.84 |
| <b>GlcNAc</b> | 102.47 |
| <b>Gal(2)</b> | 103.35 |

<sup>[a]</sup> Not assigned

<sup>[b]</sup> Not applicable

MALDI TOF-MS  $m/z$  calcd for  $\text{C}_{58}\text{H}_{89}\text{N}_6\text{O}_{34}\text{Na}_2$  ( $\text{M} + 2\text{Na}$ )<sup>+</sup> exact 1459.5221, found 1459.2794.

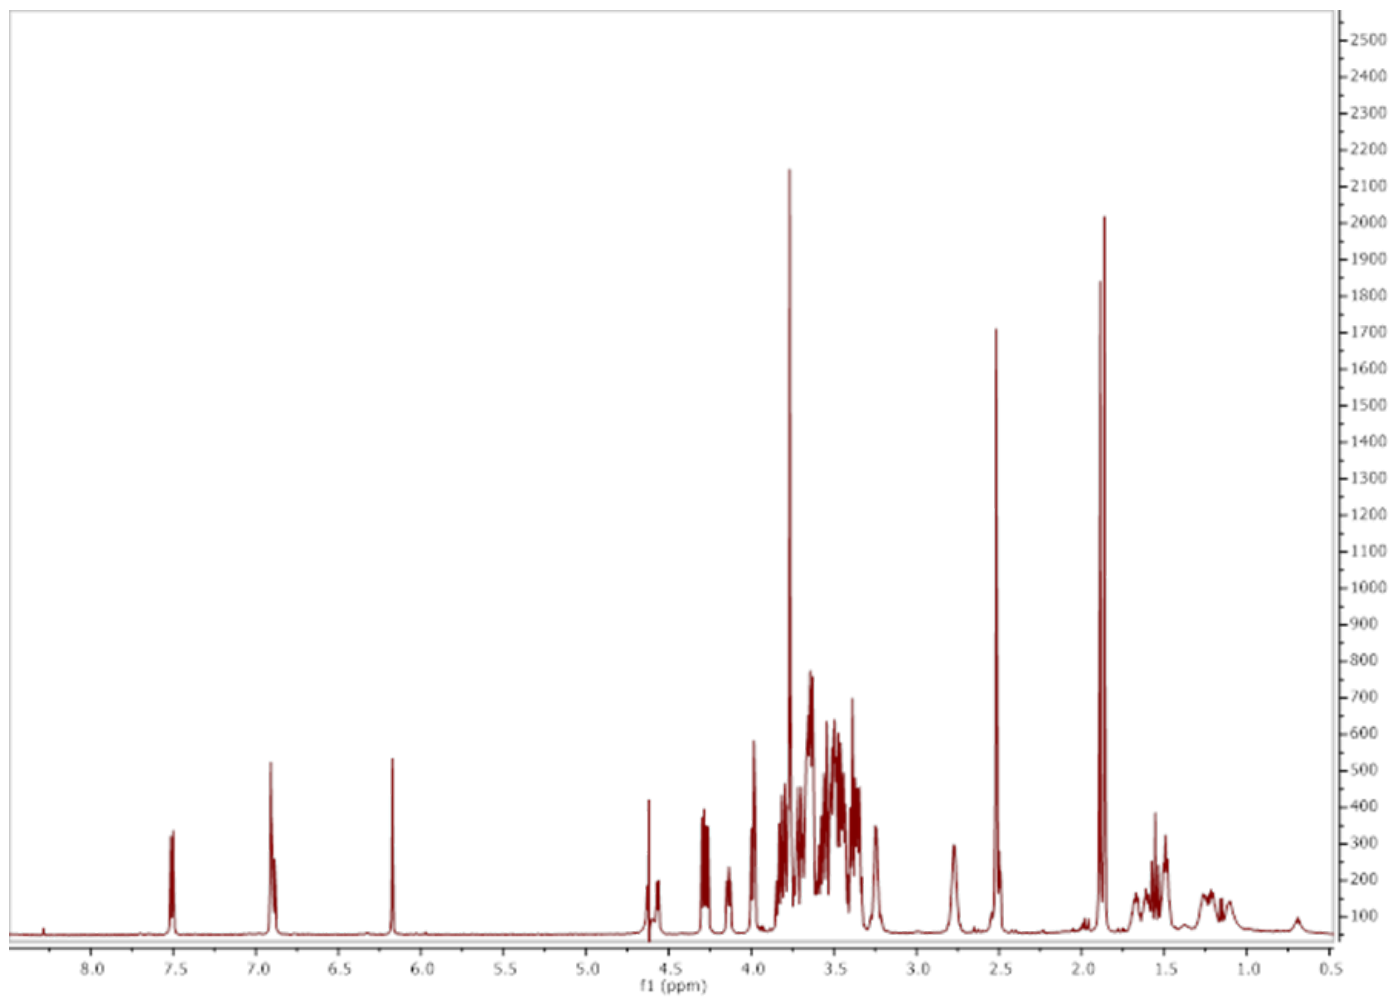

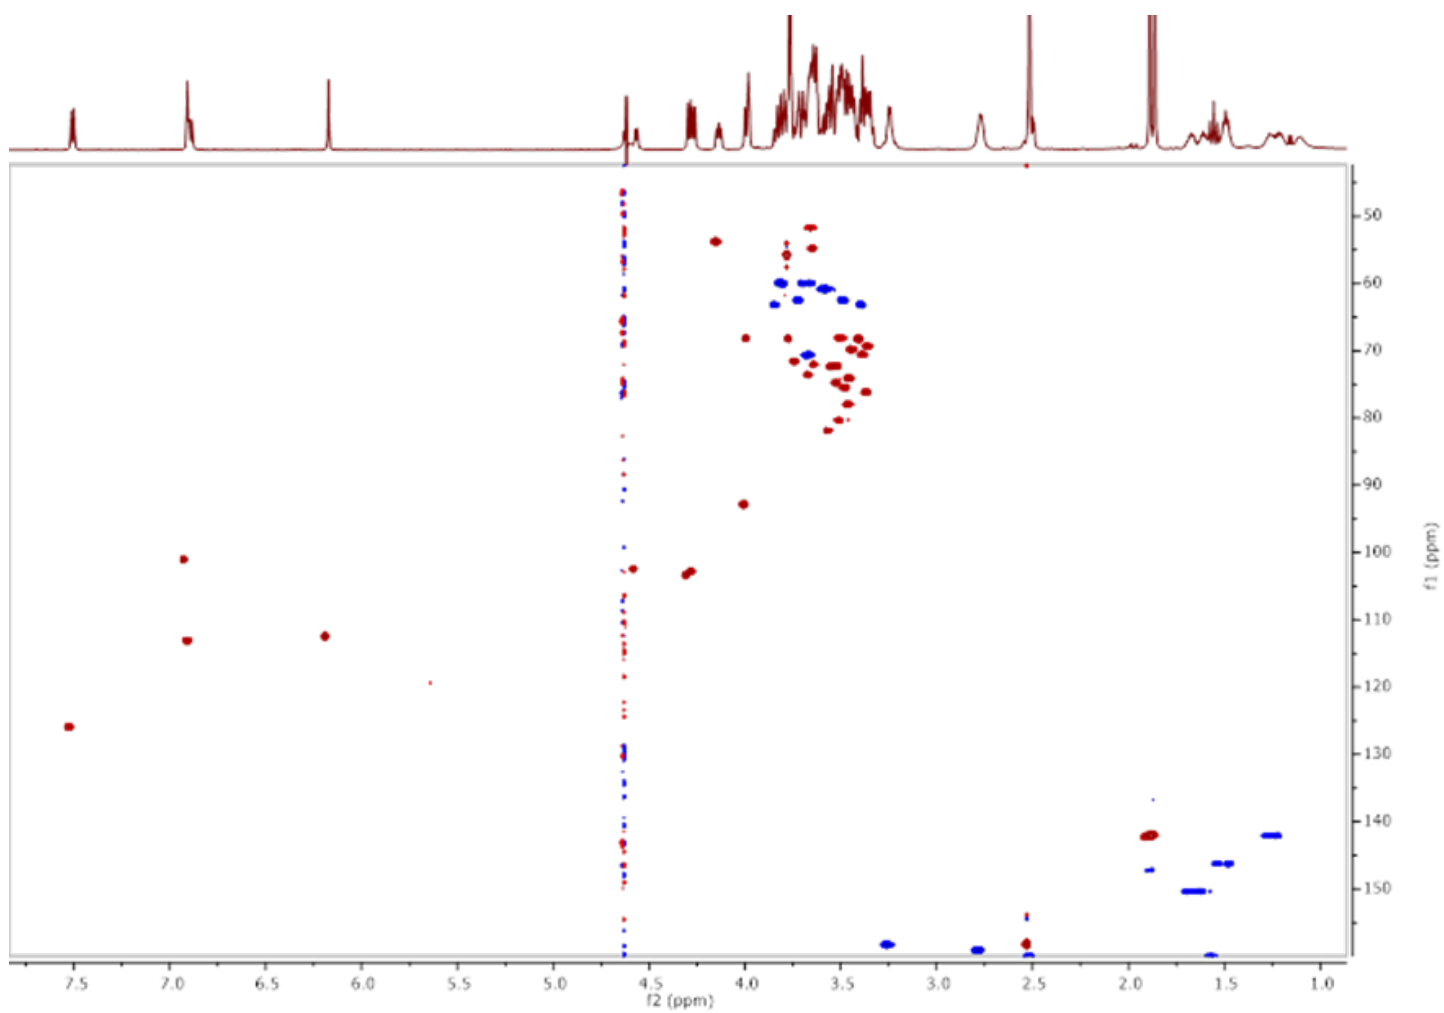

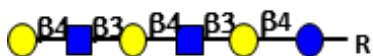

50

$^1\text{H}$  (800 MHz,  $\text{D}_2\text{O}$ ):  $\delta$  (ppm)

|           | H1   | H2   | H3   | H4   | H5                 | H6  | NHAc                |
|-----------|------|------|------|------|--------------------|-----|---------------------|
| Glc       | 4.00 | 3.36 | 3.45 | 3.57 | n/a <sup>[a]</sup> | n/a | - <sup>[b]</sup>    |
| Gal       | 4.27 | 3.44 | 3.56 | 4.00 | n/a                | n/a | -                   |
| GlcNAc    | 4.56 | 3.66 | 3.58 | 3.43 | n/a                | n/a | 1.88<br>(br. s, 6H) |
| Gal(2)    | 4.33 | 3.39 | 3.51 | 3.78 | n/a                | n/a | -                   |
| GlcNAc(2) | 4.56 | 3.66 | 3.58 | 3.43 | n/a                | n/a | 1.88<br>(br. S, 6H) |
| Gal(3)    | 4.31 | 3.43 | 3.58 | 4.00 | n/a                | n/a | -                   |

$^{13}\text{C}$  from BSHSQC (200 MHz,  $\text{D}_2\text{O}$ ):  $\delta$  (ppm)

|           | C1     |
|-----------|--------|
| Glc       | 93.42  |
| Gal       | 103.15 |
| GlcNAc    | 102.69 |
| Gal(2)    | 103.15 |
| GlcNAc(2) | 102.69 |
| Gal(3)    | 103.15 |

<sup>[a]</sup> Not assigned

<sup>[b]</sup> Not applicable

MALDI TOF-MS  $m/z$  calcd  $\text{C}_{61}\text{H}_{96}\text{N}_6\text{O}_{36}\text{Na}$  ( $\text{M} + \text{Na}$ )<sup>+</sup> exact 1511.5763, found 1511.4916.

ARP-V-81\_PRESAT\_20140621\_01  
ARP-V-81

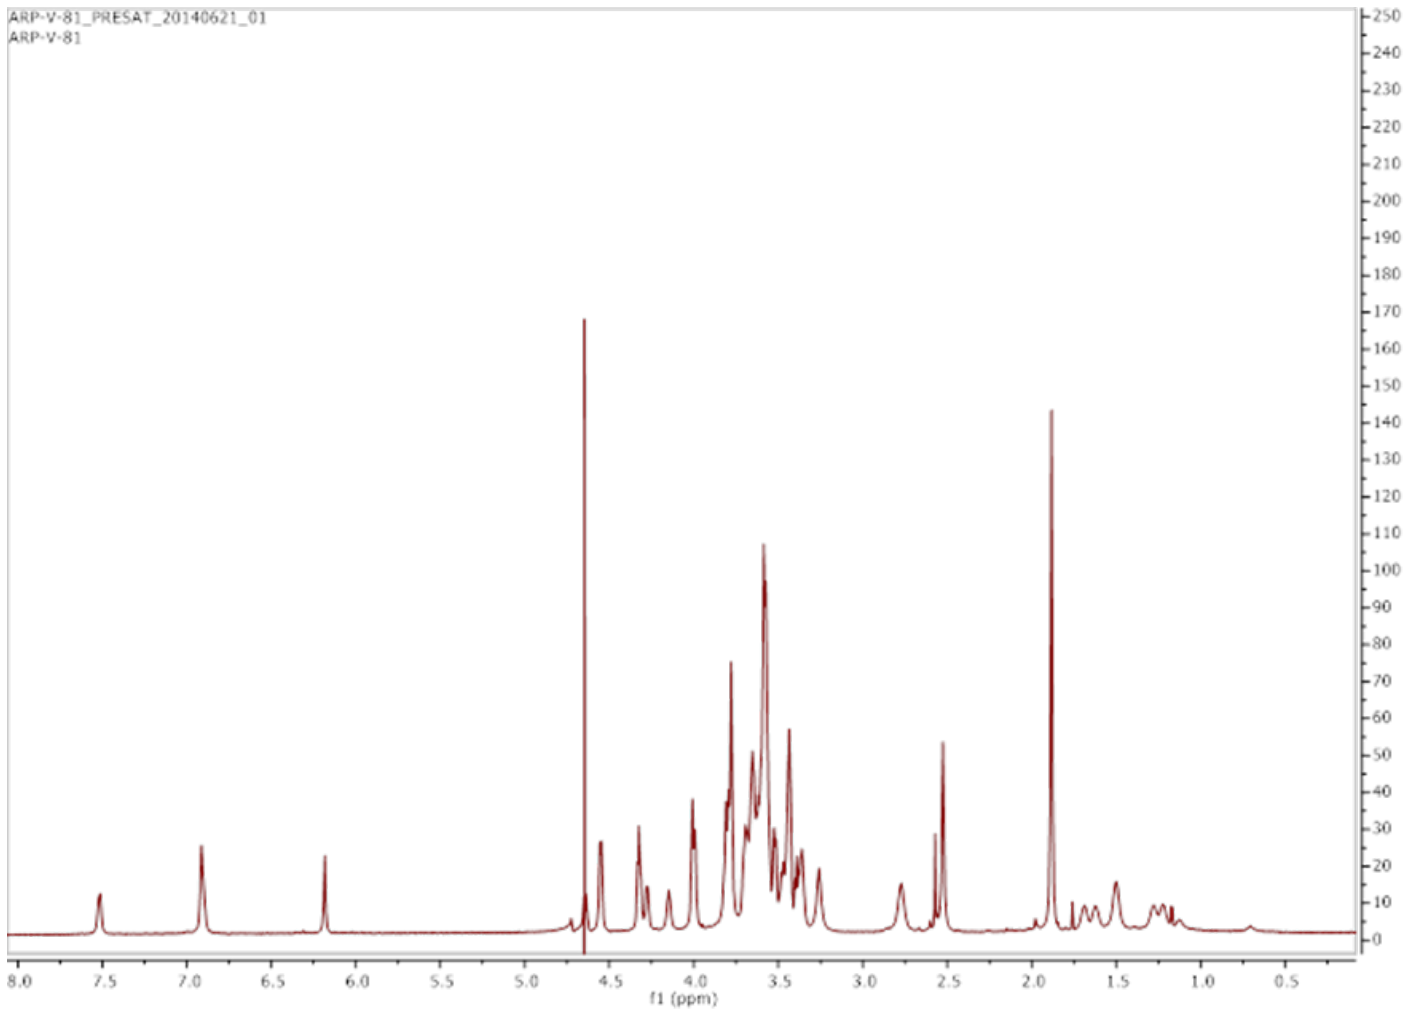



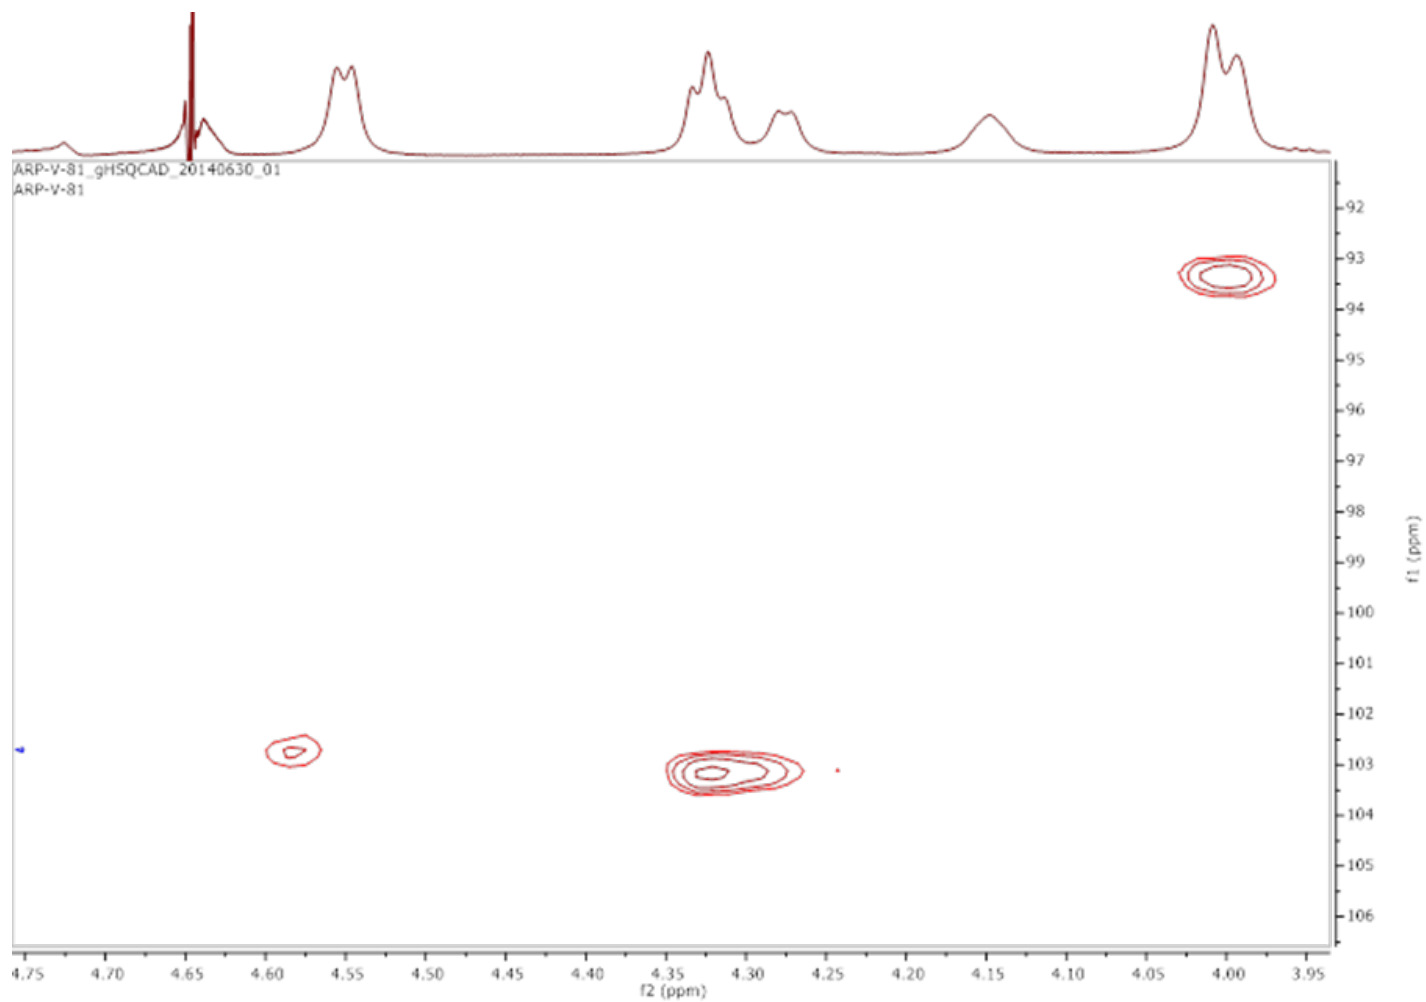

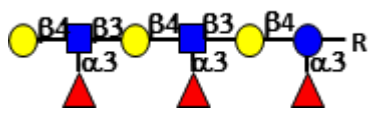

51

$^1\text{H}$  (800 MHz,  $\text{D}_2\text{O}$ ):  $\delta$  (ppm)

|                  | H1                            | H2   | H3   | H4   | H5                 | H6  | $\text{CH}_3$          | NHAc            |
|------------------|-------------------------------|------|------|------|--------------------|-----|------------------------|-----------------|
| <b>Glc</b>       | 4.00<br>(d, $J = 8.6$ Hz, 1H) | 3.58 | 3.64 | 3.68 | n/a <sup>[a]</sup> | n/a | - <sup>[b]</sup>       | -               |
| <b>Gal</b>       | 4.26                          | 3.35 | 3.55 | 3.94 | n/a                | n/a | -                      | -               |
| <b>GlcNAc</b>    | 4.56<br>(d, $J = 8.3$ Hz, 2H) | 3.82 | 3.73 | 3.43 | n/a                | n/a | -                      | 1.86<br>(s, 6H) |
| <b>Gal(2)</b>    | 4.30                          | 3.36 | 3.56 | 3.94 | n/a                | n/a | -                      | -               |
| <b>GlcNAc(2)</b> | 4.56<br>(d, $J = 8.3$ Hz, 2H) | 3.82 | 3.73 | 3.43 | n/a                | n/a | -                      | 1.86<br>(s, 6H) |
| <b>Gal(3)</b>    | 4.32                          | 3.36 | 3.51 | 3.75 | n/a                | n/a | -                      | -               |
| <b>Fuc(1)</b>    | 5.27                          | 3.65 | 3.80 | n/a  | 4.68               | -   | 1.02 – 0.94<br>(m, 9H) | -               |
| <b>Fuc(2)</b>    | 4.97                          | 3.55 | 3.75 | 3.64 | 4.68               | -   | 1.02 – 0.94<br>(m, 9H) | -               |
| <b>Fuc(3)</b>    | 4.97                          | 3.55 | 3.75 | 3.64 | 4.68               | -   | 1.02 – 0.94<br>(m, 9H) | -               |

<sup>[a]</sup> Not assigned

<sup>[b]</sup> Not applicable

MALDI TOF-MS  $m/z$  calcd  $\text{C}_{79}\text{H}_{126}\text{N}_6\text{O}_{48}\text{Na}$  ( $\text{M} + \text{Na}$ )<sup>+</sup> exact 1949.7501, found 1950.0043.

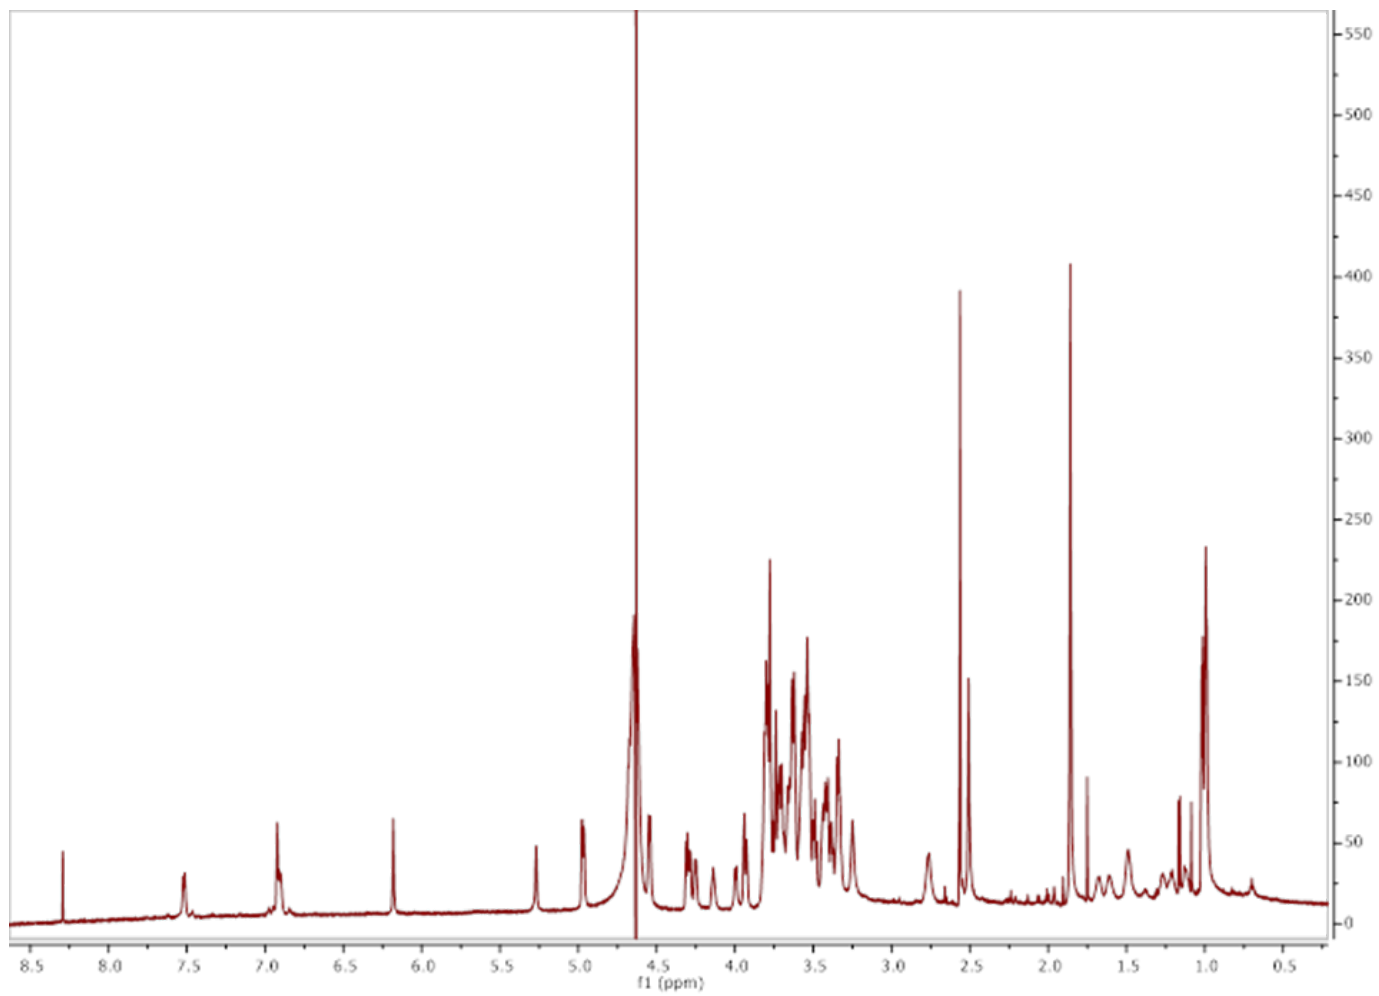

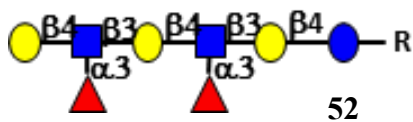

$^1\text{H}$  (800 MHz,  $\text{D}_2\text{O}$ ):  $\delta$  (ppm)

|                  | H1                            | H2   | H3   | H4                            | H5                 | H6  | $\text{CH}_3$                 | NHAc            |
|------------------|-------------------------------|------|------|-------------------------------|--------------------|-----|-------------------------------|-----------------|
| <b>Glc</b>       | 4.00                          | 3.35 | 3.45 | 3.55                          | n/a <sup>[a]</sup> | n/a | - <sup>[b]</sup>              | -               |
| <b>Gal</b>       | 4.27<br>(d, $J = 7.9$ Hz, 1H) | 3.42 | 3.54 | 4.00                          | n/a                | n/a | -                             | -               |
| <b>GlcNAc</b>    | 4.54                          | 3.80 | 3.73 | 3.43                          | n/a                | n/a | -                             | 1.86<br>(s, 6H) |
| <b>Gal(2)</b>    | 4.30<br>(d, $J = 7.8$ Hz, 1H) | 3.35 | 3.56 | 3.95<br>(d, $J = 2.7$ Hz, 1H) | n/a                | n/a | -                             | -               |
| <b>GlcNAc(2)</b> | 4.54                          | 3.80 | 3.73 | 3.43                          | n/a                | n/a | -                             | 1.86<br>(s, 6H) |
| <b>Gal(3)</b>    | 4.32<br>(d, $J = 7.8$ Hz, 1H) | 3.34 | 3.50 | 3.75                          | n/a                | n/a | -                             | -               |
| <b>Fuc(1)</b>    | 4.95<br>(d, $J = 3.8$ Hz, 1H) | 3.53 | 3.74 | 3.63                          | 4.64               | -   | 0.99<br>(d, $J = 6.5$ Hz, 3H) | -               |
| <b>Fuc(2)</b>    | 4.97<br>(d, $J = 3.9$ Hz, 1H) | 3.53 | 3.76 | 3.64                          | 4.67               | -   | 1.02<br>(d, $J = 6.6$ Hz, 3H) | -               |

$^{13}\text{C}$  from BSHSQC (200 MHz,  $\text{D}_2\text{O}$ ):  $\delta$  (ppm)

|                  | C1     |
|------------------|--------|
| <b>Glc</b>       | 93.93  |
| <b>Gal</b>       | 102.84 |
| <b>GlcNAc</b>    | 102.43 |
| <b>Gal(2)</b>    | 101.67 |
| <b>GlcNAc(2)</b> | 102.43 |
| <b>Gal(3)</b>    | 101.67 |
| <b>Fuc(1)</b>    | 98,62  |
| <b>Fuc(2)</b>    | 98.52  |

<sup>[a]</sup> Not assigned

<sup>[b]</sup> Not applicable

MALDI TOF-MS  $m/z$  calcd  $\text{C}_{73}\text{H}_{116}\text{N}_6\text{O}_{44}\text{Na}$  ( $\text{M} + \text{Na}$ )<sup>+</sup> exact 1803.6922, found 1804.2268.

ARP-VI-87\_cold\_probe\_PRESAT\_20141105\_01  
ARP-VI-87\_cold\_probe

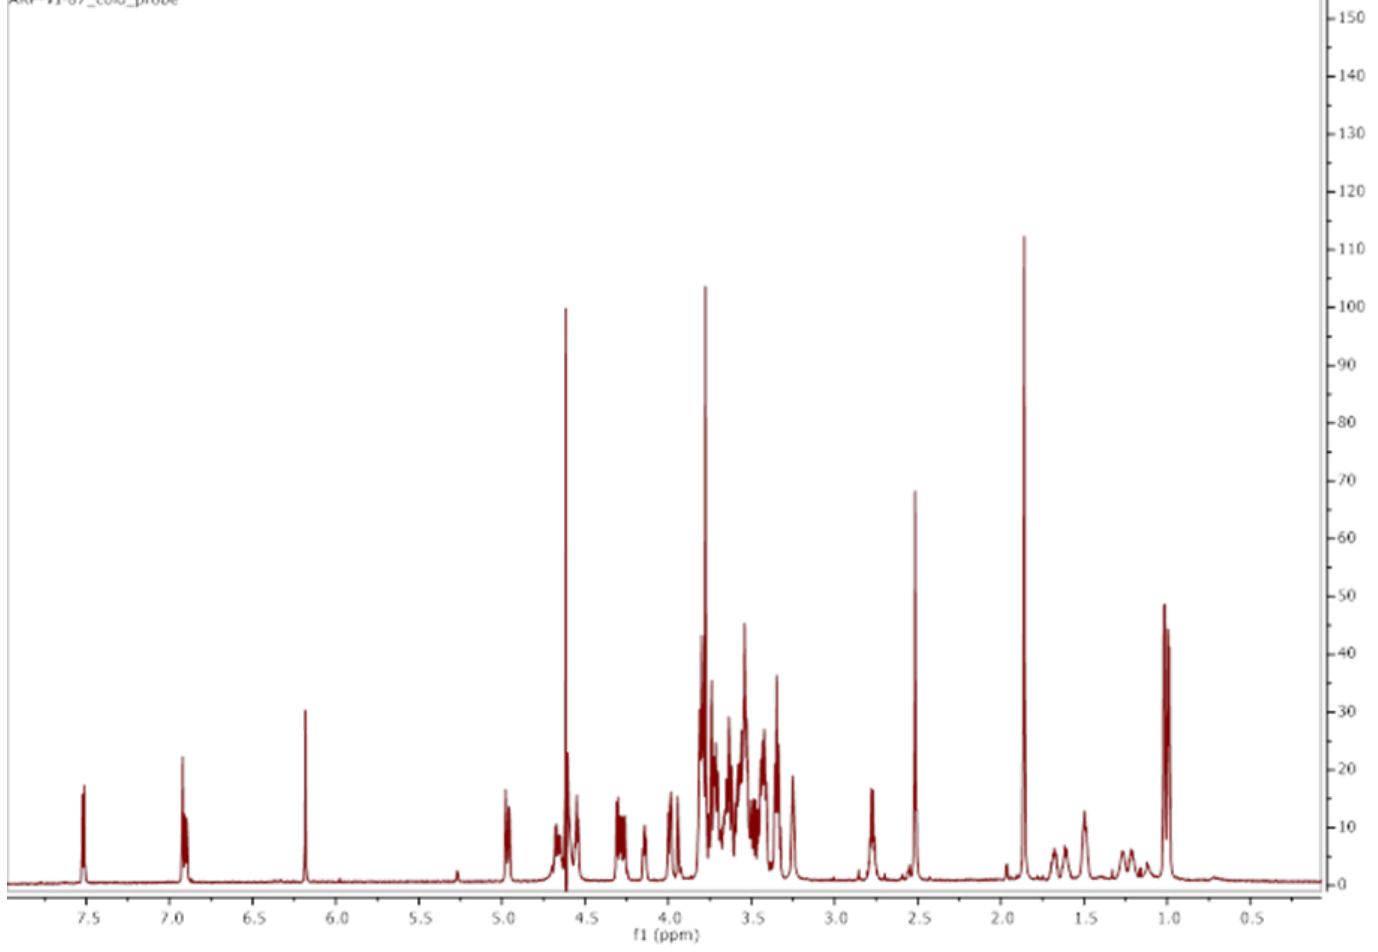

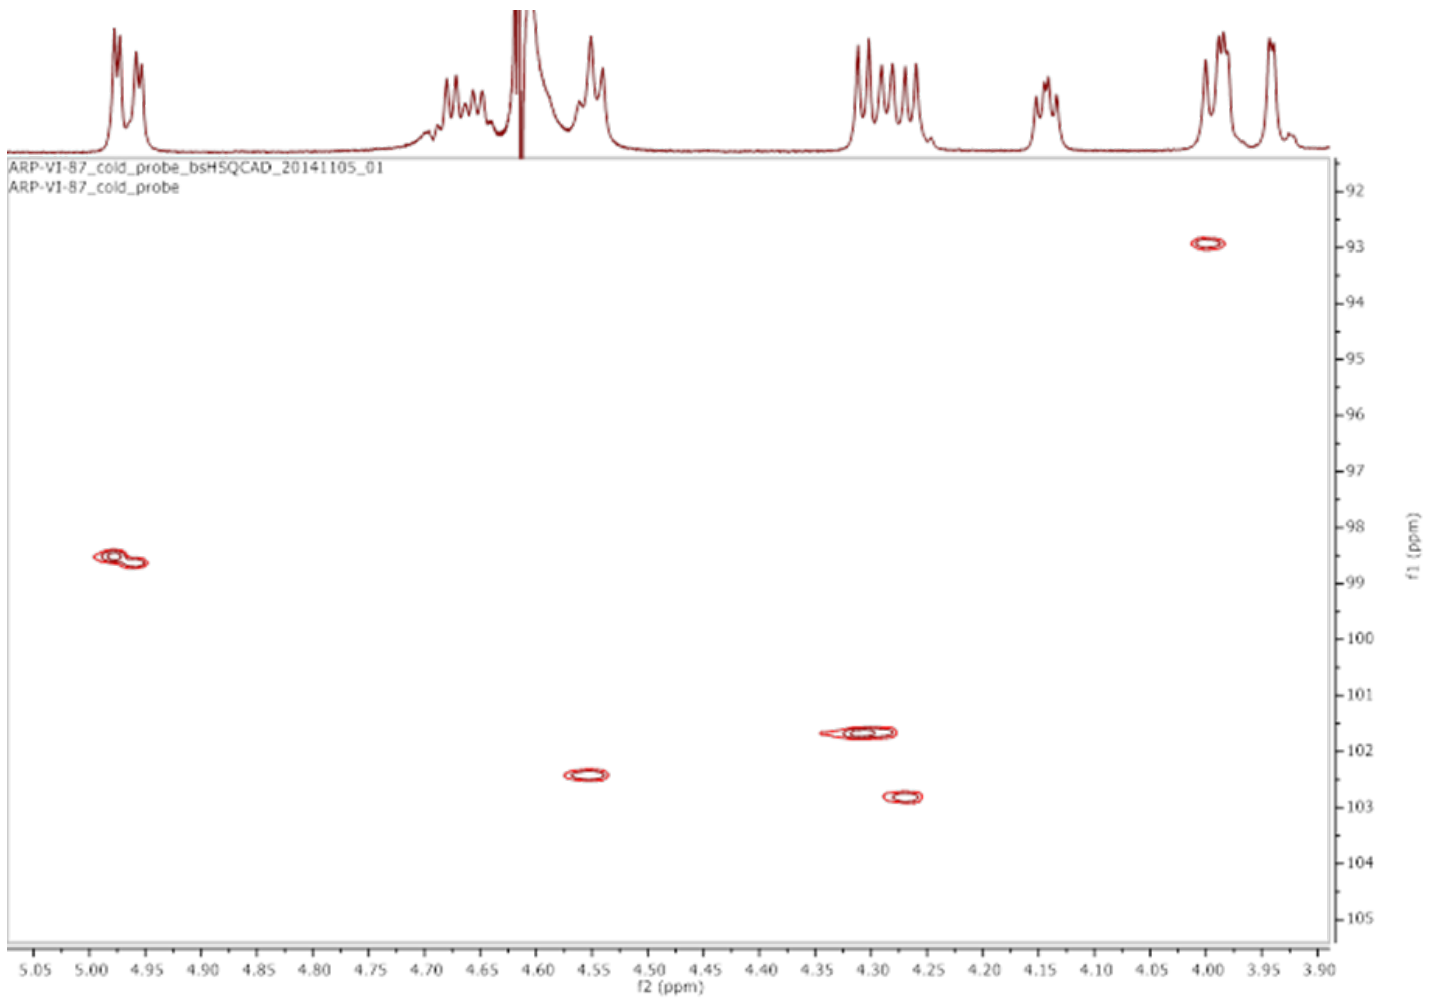

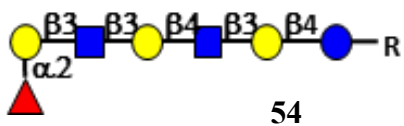

$^1\text{H}$  (600 MHz,  $\text{D}_2\text{O}$ ):  $\delta$  (ppm)

|                  | H1   | H2   | H3   | H4   | H5                 | H6  | NHAc                   | CH <sub>3</sub>               |
|------------------|------|------|------|------|--------------------|-----|------------------------|-------------------------------|
| <b>Glc</b>       | 4.00 | 3.36 | 3.45 | 3.57 | n/a <sup>[a]</sup> | n/a | - <sup>[b]</sup>       | -                             |
| <b>Gal</b>       | 4.27 | 3.41 | 3.56 | 3.99 | n/a                | n/a | -                      | -                             |
| <b>GlcNAc</b>    | 4.54 | 3.64 | 3.57 | 3.42 | n/a                | n/a | 1.93 – 1.84<br>(m, 6H) | -                             |
| <b>Gal(2)</b>    | 4.27 | 3.41 | 3.56 | 3.99 | n/a                | n/a | -                      | -                             |
| <b>GlcNAc(2)</b> | 4.45 | 3.66 | 3.83 | 3.34 | n/a                | n/a | 1.93 – 1.84<br>(m, 6H) | -                             |
| <b>Gal(3)</b>    | 4.48 | 3.43 | 3.67 | 3.73 | n/a                | n/a | -                      | -                             |
| <b>Fuc</b>       | 5.03 | 3.61 | 3.58 | n/a  | 4.14               | -   | -                      | 1.08<br>(d, $J = 6.0$ Hz, 3H) |

$^{13}\text{C}$  from BSHSQC (150 MHz,  $\text{D}_2\text{O}$ ):  $\delta$  (ppm)

|                  | C1     |
|------------------|--------|
| <b>Glc</b>       | 92.87  |
| <b>Gal</b>       | 102.81 |
| <b>GlcNAc</b>    | 102.64 |
| <b>Gal(2)</b>    | 102.81 |
| <b>GlcNAc(2)</b> | 103.17 |
| <b>Gal(3)</b>    | 100.20 |
| <b>Fuc</b>       | 99.41  |

<sup>[a]</sup> Not assigned

<sup>[b]</sup> Not applicable

MALDI TOF-MS  $m/z$  calcd  $\text{C}_{67}\text{H}_{106}\text{N}_6\text{O}_{40}\text{Na}$  ( $M + \text{Na}$ )<sup>+</sup> exact 1657.6343, found 1657.5427.

ARP-VI-97\_PROTON\_20141113\_02  
ARP-VI-97

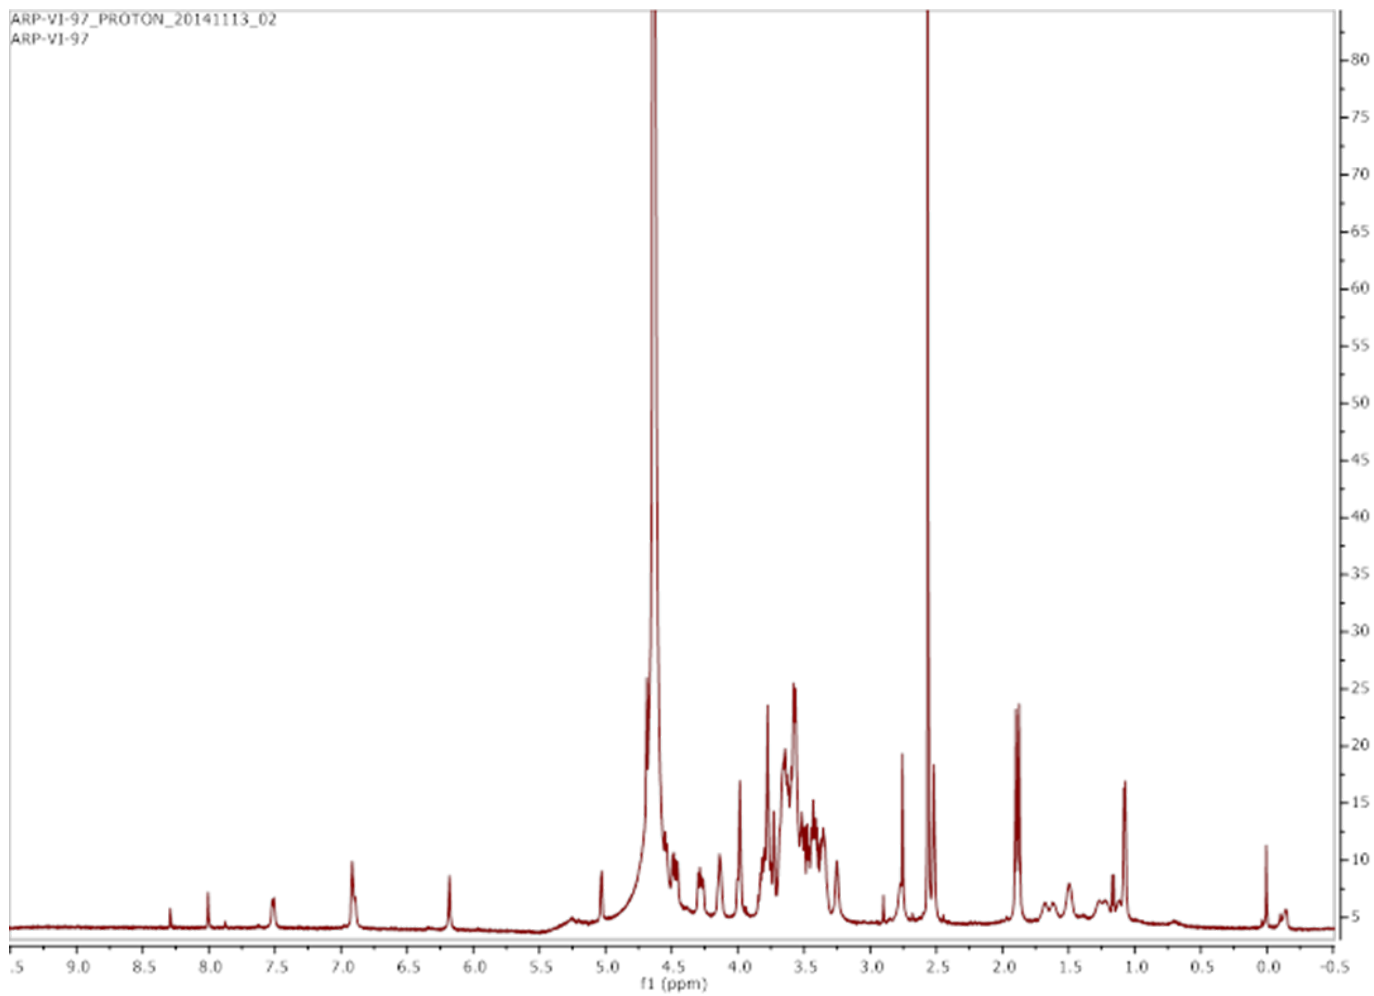



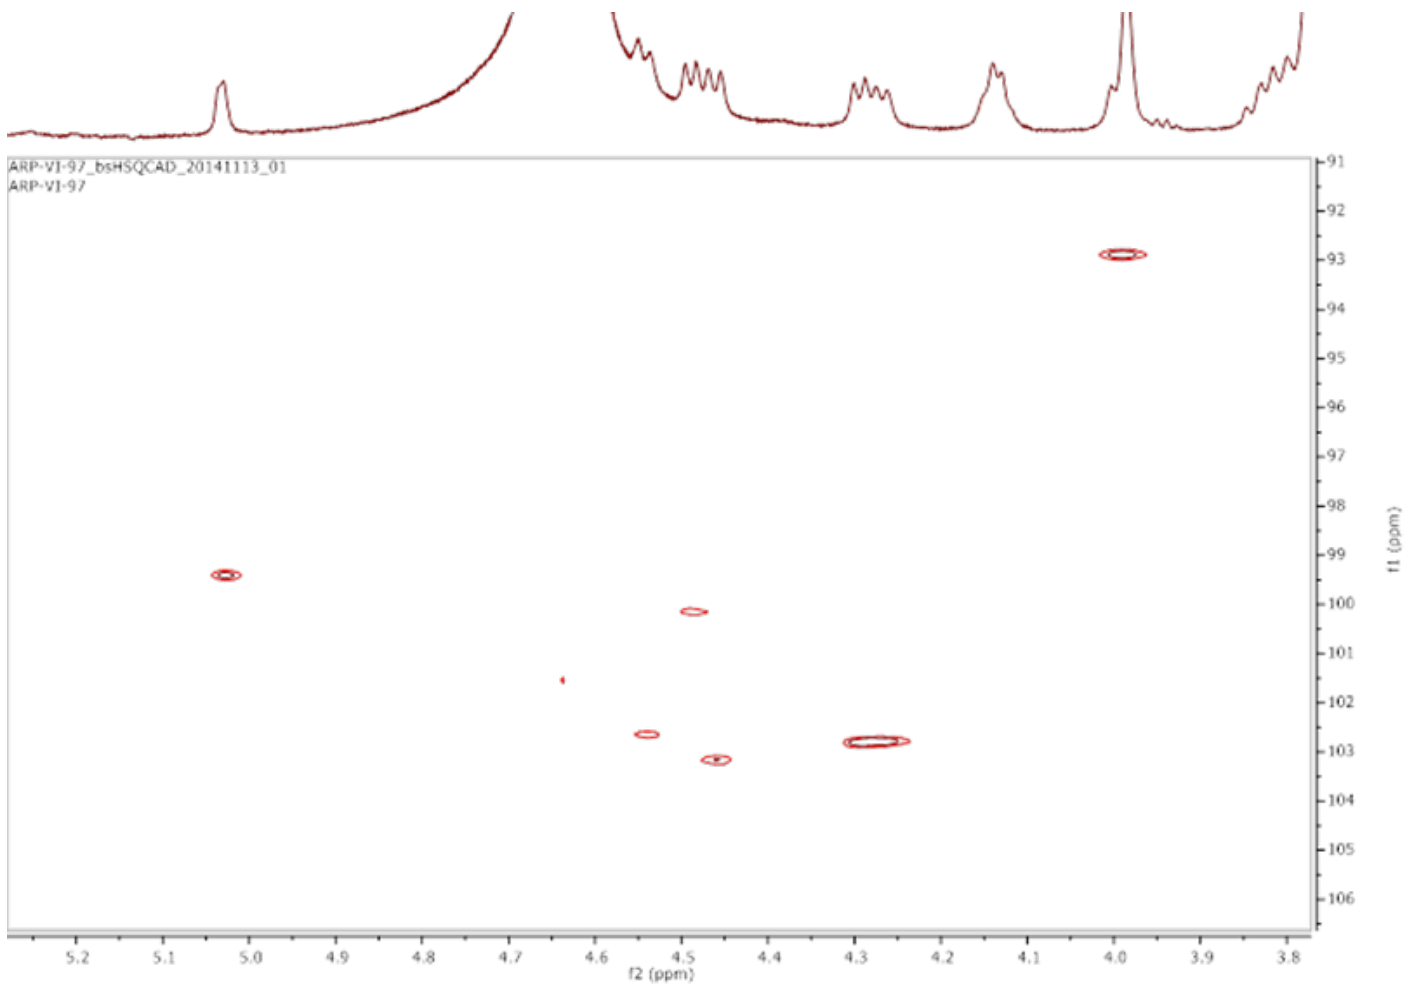

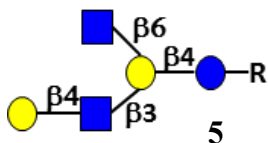

$^1\text{H}$  (600 MHz,  $\text{D}_2\text{O}$ ):  $\delta$  (ppm)

|                  | H1                            | H2   | H3   | H4   | H5                 | H6           | NHAc             |
|------------------|-------------------------------|------|------|------|--------------------|--------------|------------------|
| <b>Glc</b>       | 4.00<br>(d, $J = 9.1$ Hz, 1H) | 3.34 | 3.47 | 3.40 | n/a <sup>[a]</sup> | n/a          | - <sup>[b]</sup> |
| <b>Gal</b>       | 4.26<br>(d, $J = 7.3$ Hz, 1H) | 3.42 | 3.54 | 3.98 | n/a                | 3.81<br>3.68 | -                |
| <b>GlcNAc</b>    | 4.54<br>(d, $J = 8.2$ Hz, 1H) | 3.63 | 3.42 | 3.57 | n/a                | n/a          | 1.88<br>(s, 3H)  |
| <b>Gal(2)</b>    | 4.32<br>(d, $J = 7.8$ Hz, 1H) | 3.37 | 3.51 | 3.76 | n/a                | n/a          | -                |
| <b>GlcNAc(2)</b> | 4.44<br>(d, $J = 8.4$ Hz, 1H) | 3.53 | 3.39 | 3.28 | n/a                | n/a          | 1.89<br>(s, 3H)  |

$^{13}\text{C}$  from BSHSQC (150 MHz,  $\text{D}_2\text{O}$ ):  $\delta$  (ppm)

|                  | C1     |
|------------------|--------|
| <b>Glc</b>       | 92.67  |
| <b>Gal</b>       | 102.77 |
| <b>GlcNAc</b>    | 102.46 |
| <b>Gal(2)</b>    | 102.59 |
| <b>GlcNAc(2)</b> | 100.83 |

<sup>[a]</sup> Not assigned

<sup>[b]</sup> Not applicable

MALDI TOF-MS  $m/z$  calcd for  $\text{C}_{55}\text{H}_{86}\text{N}_6\text{O}_{31}\text{Na}$  ( $\text{M} + \text{Na}$ )<sup>+</sup> exact 1349.5235, found 1349.2135.

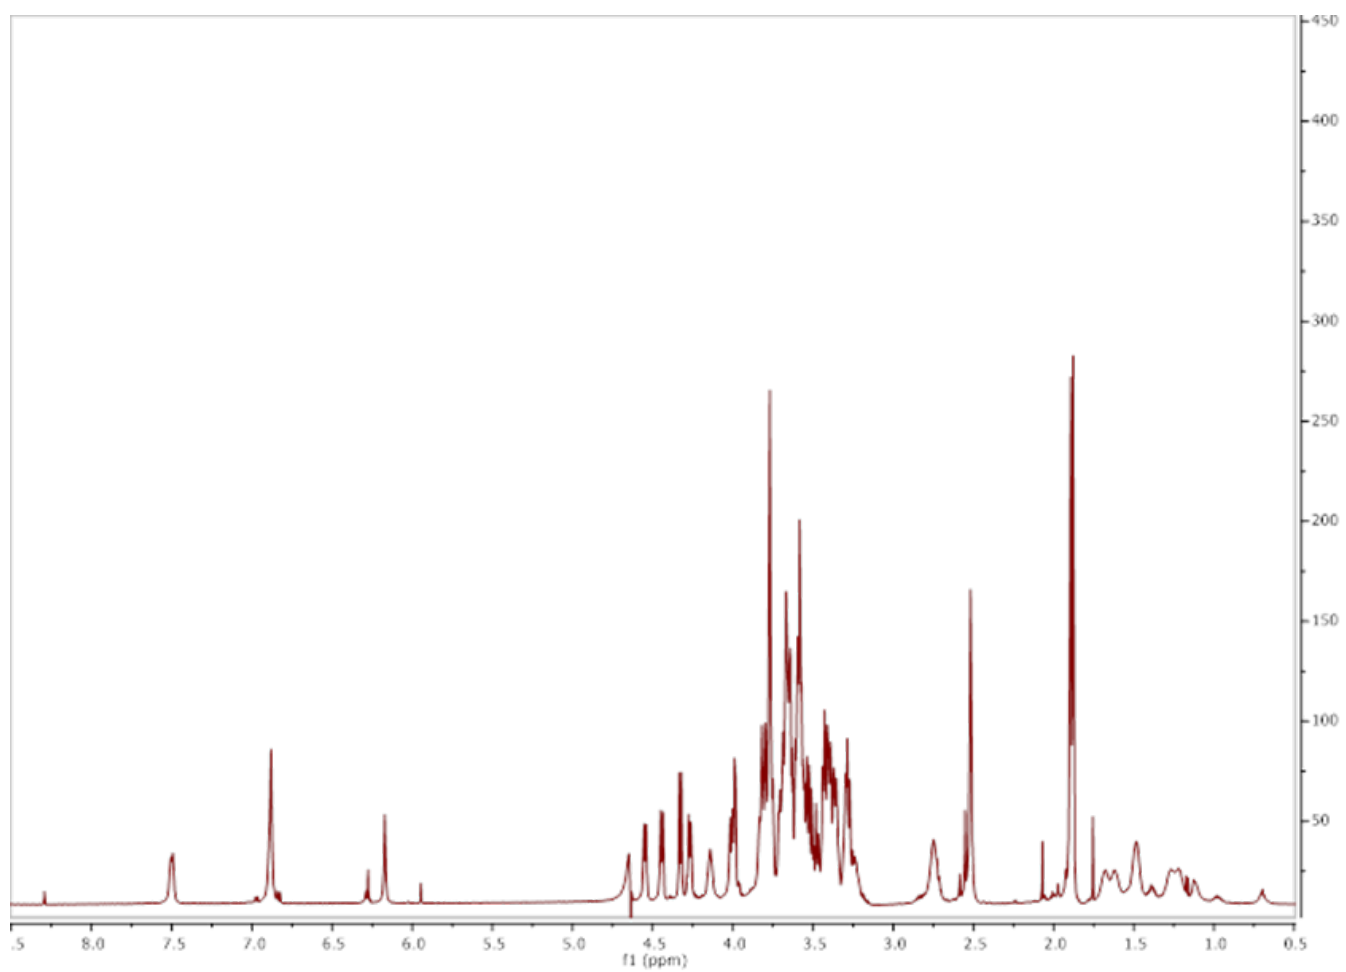

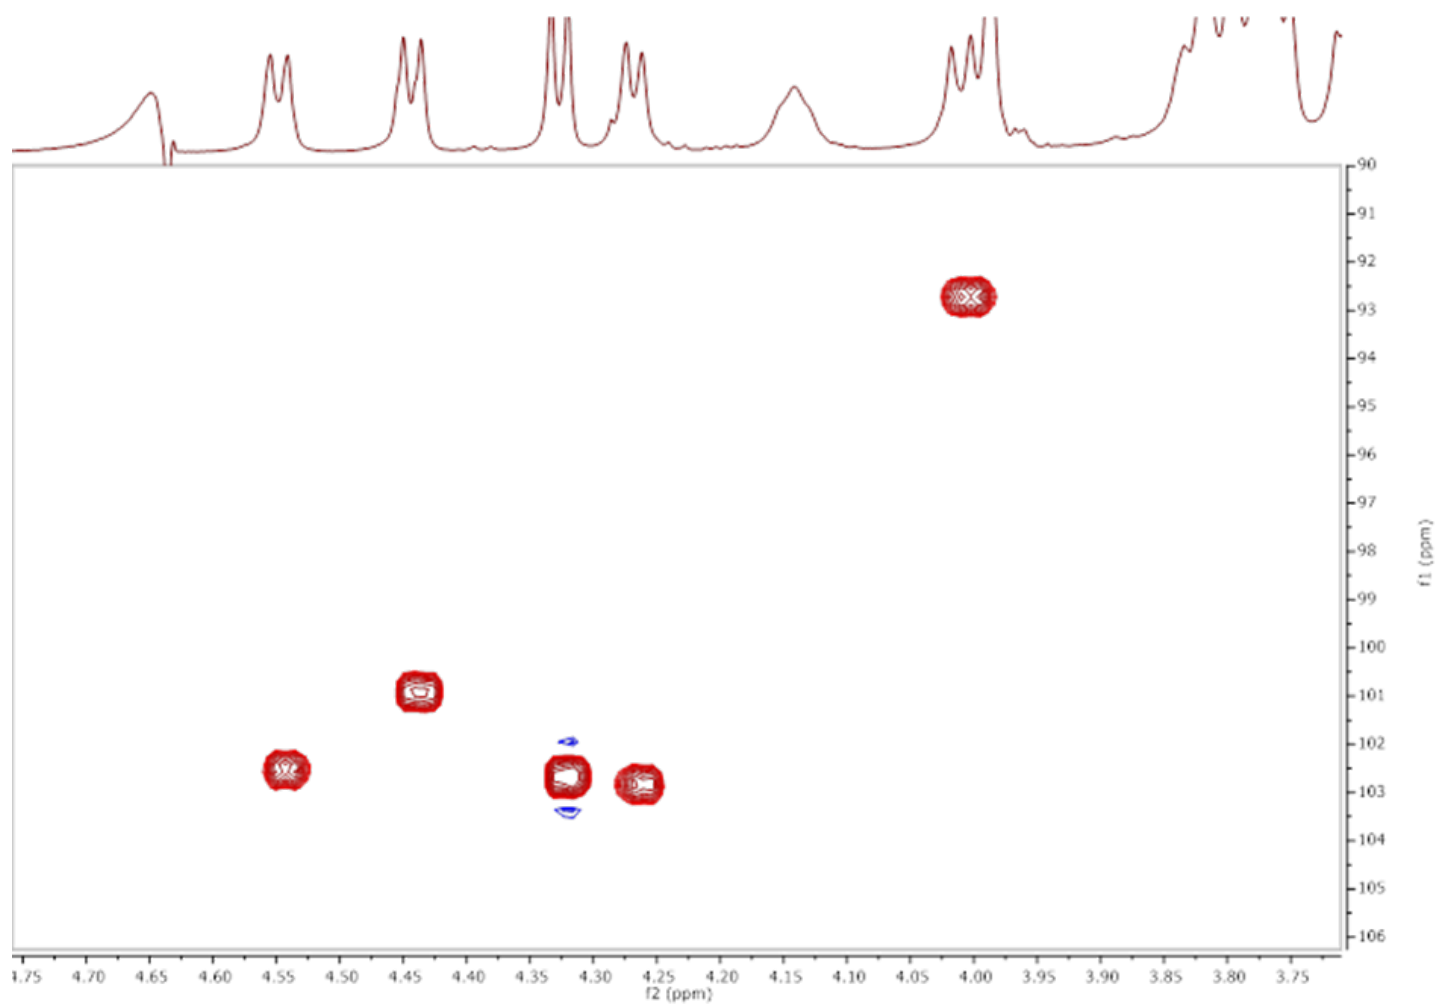

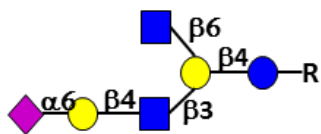

6

$^1\text{H}$  (600 MHz,  $\text{D}_2\text{O}$ ):  $\delta$  (ppm)

|                  | H1                            | H2   | H3                                                   | H4   | H5                 | H6   | H7               | H8  | H9  | NHAc            |
|------------------|-------------------------------|------|------------------------------------------------------|------|--------------------|------|------------------|-----|-----|-----------------|
| <b>Glc</b>       | 4.00<br>(d, $J = 9.3$ Hz, 1H) | 3.34 | 3.47                                                 | 3.39 | n/a <sup>[a]</sup> | n/a  | - <sup>[b]</sup> | -   | -   | -               |
| <b>Gal</b>       | 4.26<br>(d, $J = 7.9$ Hz, 1H) | 3.41 | 3.54                                                 | 3.97 | n/a                | n/a  | -                | -   | -   | -               |
| <b>GlcNAc</b>    | 4.56<br>(d, $J = 7.3$ Hz, 1H) | 3.62 | 3.49                                                 | n/a  | n/a                | n/a  | -                | -   | -   | 1.90<br>(s, 6H) |
| <b>Gal(2)</b>    | 4.28<br>(d, $J = 7.8$ Hz, 1H) | 3.37 | 3.49                                                 | 3.75 | n/a                | n/a  | -                | -   | -   | -               |
| <b>GlcNAc(2)</b> | 4.43<br>(d, $J = 8.3$ Hz, 1H) | 3.52 | 3.37                                                 | 3.27 | n/a                | n/a  | -                | -   | -   | 1.90<br>(s, 6H) |
| <b>Neu5Ac</b>    | -                             | -    | 3.49 - eq<br>1.57 - axial<br>(dd, $J = 12.1$ Hz, 1H) | 3.49 | 3.62               | 3.51 | n/a              | n/a | n/a | 1.87<br>(s, 3H) |

$^{13}\text{C}$  from BSHSQC (150 MHz,  $\text{D}_2\text{O}$ ):  $\delta$  (ppm)

|                  | C1     |
|------------------|--------|
| <b>Glc</b>       | 92.86  |
| <b>Gal</b>       | 102.91 |
| <b>GlcNAc</b>    | 102.50 |
| <b>Gal(2)</b>    | 103.43 |
| <b>GlcNAc(2)</b> | 101.03 |

<sup>[a]</sup> Not assigned

<sup>[b]</sup> Not applicable

MALDI TOF-MS  $m/z$  calcd  $\text{C}_{66}\text{H}_{102}\text{N}_7\text{O}_{39} \text{Na}_2$  ( $M + 2\text{Na}$ )<sup>+</sup> exact 1662.6014, found 1662.5197.

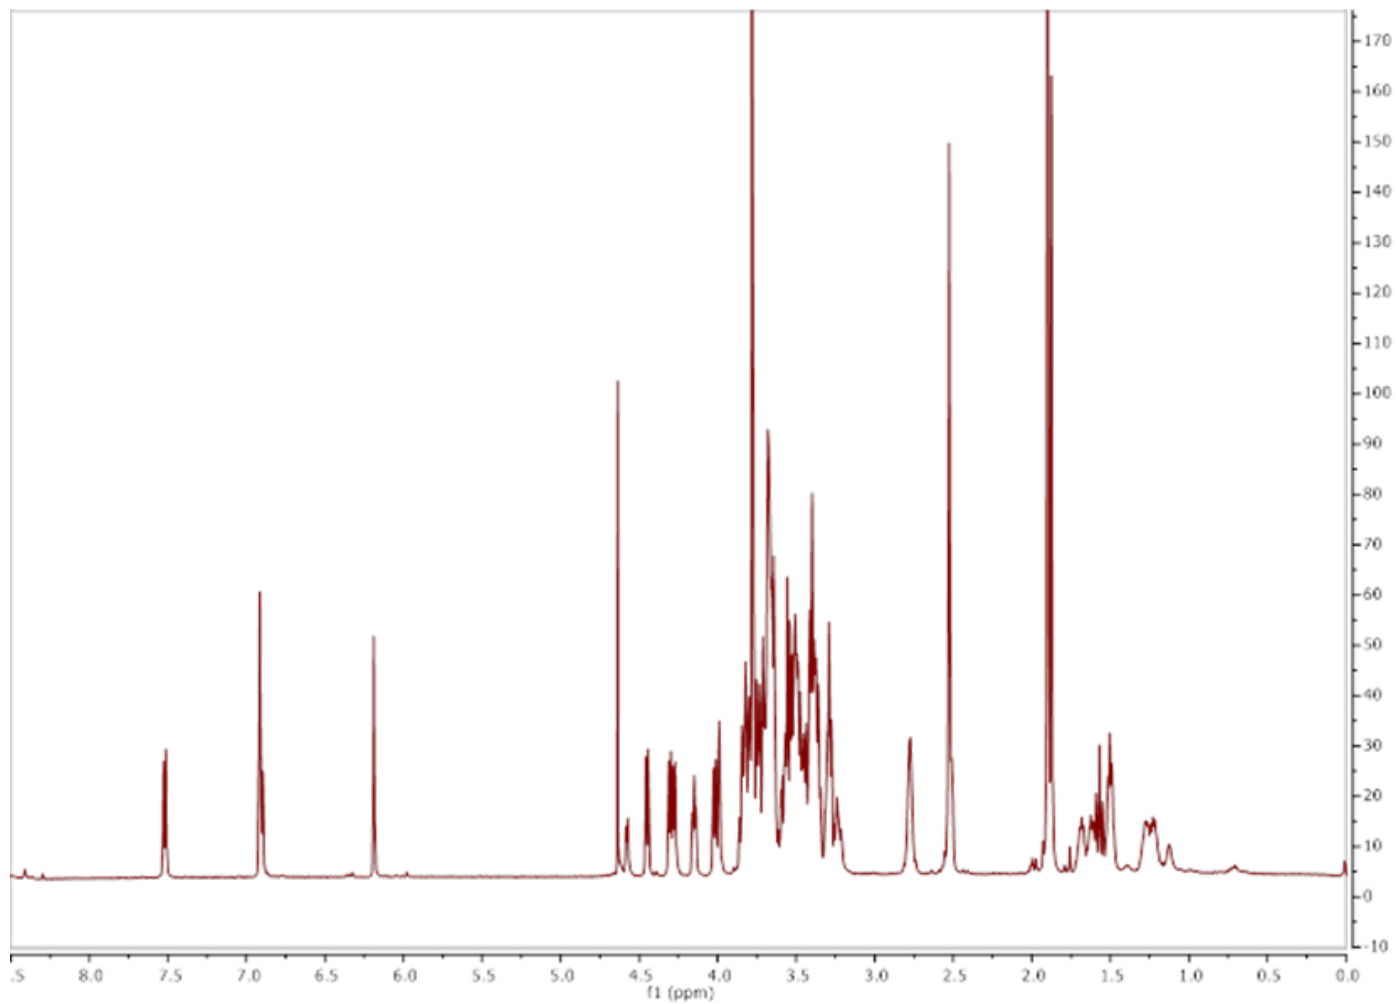

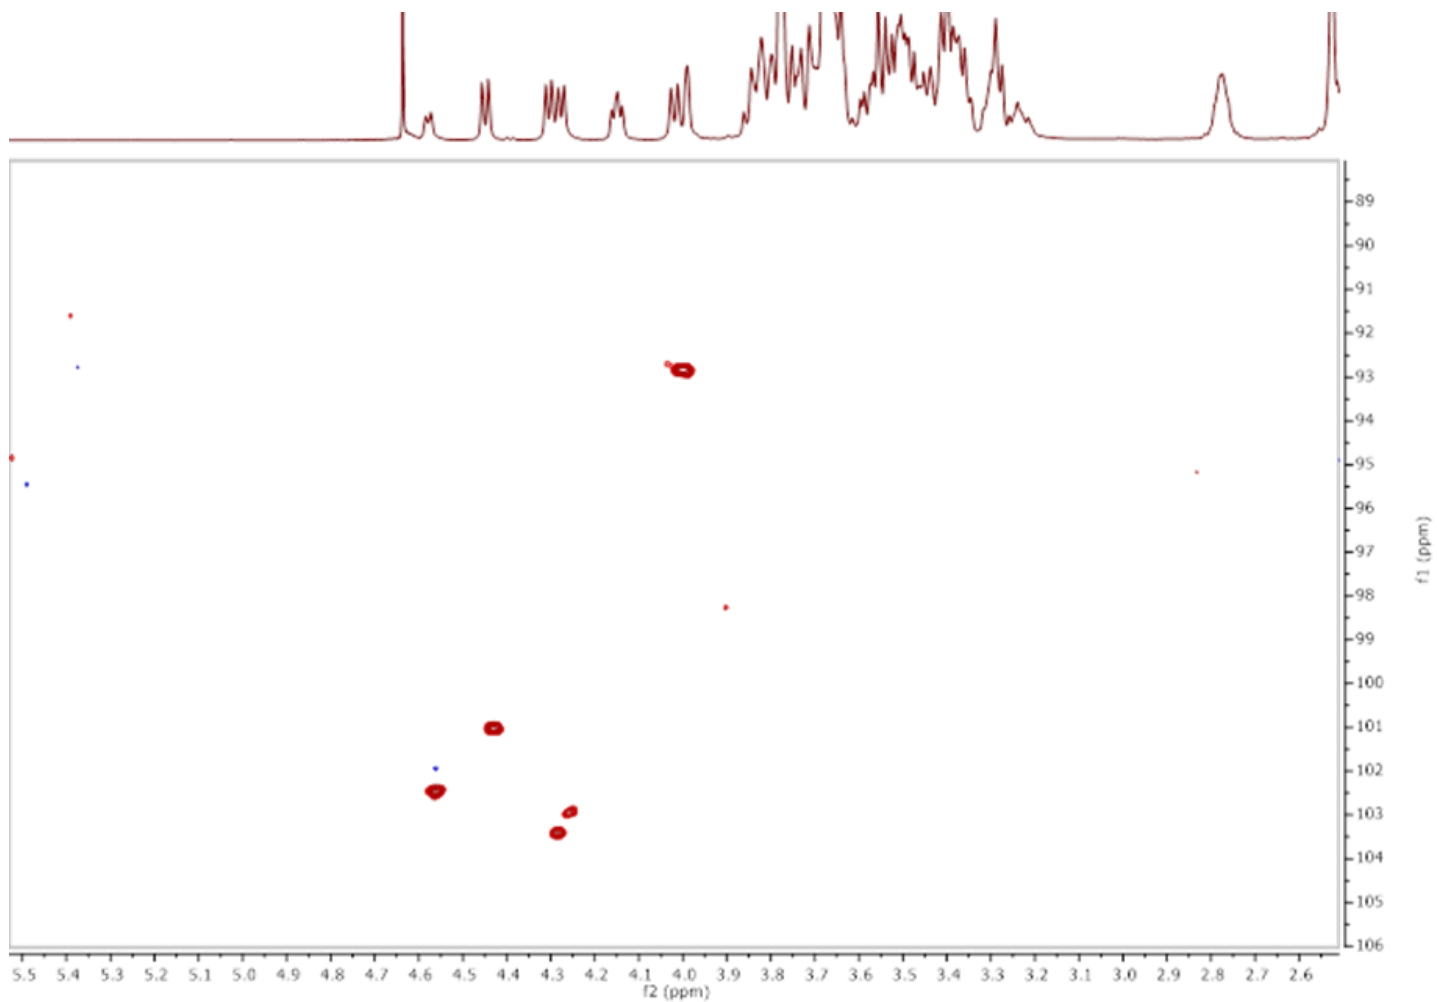

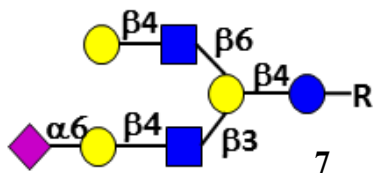

$^1\text{H}$  (800 MHz,  $\text{D}_2\text{O}$ ):  $\delta$  (ppm)

|                  | H1                            | H2   | H3                        | H4                            | H5                 | H6   | H7               | H8  | H9  | NHAc                   |
|------------------|-------------------------------|------|---------------------------|-------------------------------|--------------------|------|------------------|-----|-----|------------------------|
| <b>Glc</b>       | 4.00<br>(d, $J = 9.3$ Hz, 1H) | 3.34 | 3.47                      | 3.39                          | n/a <sup>[a]</sup> | n/a  | - <sup>[b]</sup> | -   | -   | -                      |
| <b>Gal</b>       | 4.26<br>(d, $J = 7.5$ Hz, 1H) | 3.42 | 3.54                      | 3.97<br>(d, $J = 2.9$ Hz, 1H) | n/a                | n/a  | -                | -   | -   | -                      |
| <b>GlcNAc</b>    | 4.56<br>(d, $J = 8.1$ Hz, 1H) | 3.62 | 3.49                      | 3.43                          | n/a                | n/a  | -                | -   | -   | 1.81 - 1.87<br>(m, 9H) |
| <b>Gal(2)</b>    | 4.28<br>(d, $J = 7.9$ Hz, 1H) | 3.37 | 3.50                      | 3.76                          | n/a                | n/a  | -                | -   | -   | -                      |
| <b>GlcNAc(2)</b> | 4.45<br>(d, $J = 8.2$ Hz, 1H) | 3.62 | 3.49                      | 3.43                          | n/a                | n/a  | -                | -   | -   | 1.81 - 1.87<br>(m, 9H) |
| <b>Gal(3)</b>    | 4.27<br>(d, $J = 7.7$ Hz, 1H) | 3.36 | 3.48                      | 3.74                          | n/a                | n/a  | -                | -   | -   | -                      |
| <b>Neu5Ac</b>    | -                             | -    | 2.50 - eq<br>1.54 - axial | 3.48                          | 3.62               | 3.51 | n/a              | n/a | n/a | 1.81 - 1.87<br>(s, 9H) |

$^{13}\text{C}$  from BSHSQC (200 MHz,  $\text{D}_2\text{O}$ ):  $\delta$  (ppm)

|                  | C1     |
|------------------|--------|
| <b>Glc</b>       | 92.83  |
| <b>Gal</b>       | 102.87 |
| <b>GlcNAc</b>    | 102.42 |
| <b>Gal(2)</b>    | 103.37 |
| <b>GlcNAc(2)</b> | 100.96 |
| <b>Gal(3)</b>    | 102.87 |

<sup>[a]</sup> Not assigned

<sup>[b]</sup> Not applicable

MALDI TOF-MS  $m/z$  calcd  $\text{C}_{72}\text{H}_{112}\text{N}_7\text{O}_{44}\text{Na}_2$  ( $M + 2\text{Na}$ )<sup>+</sup> exact 1824.6543, found 1824.5027.



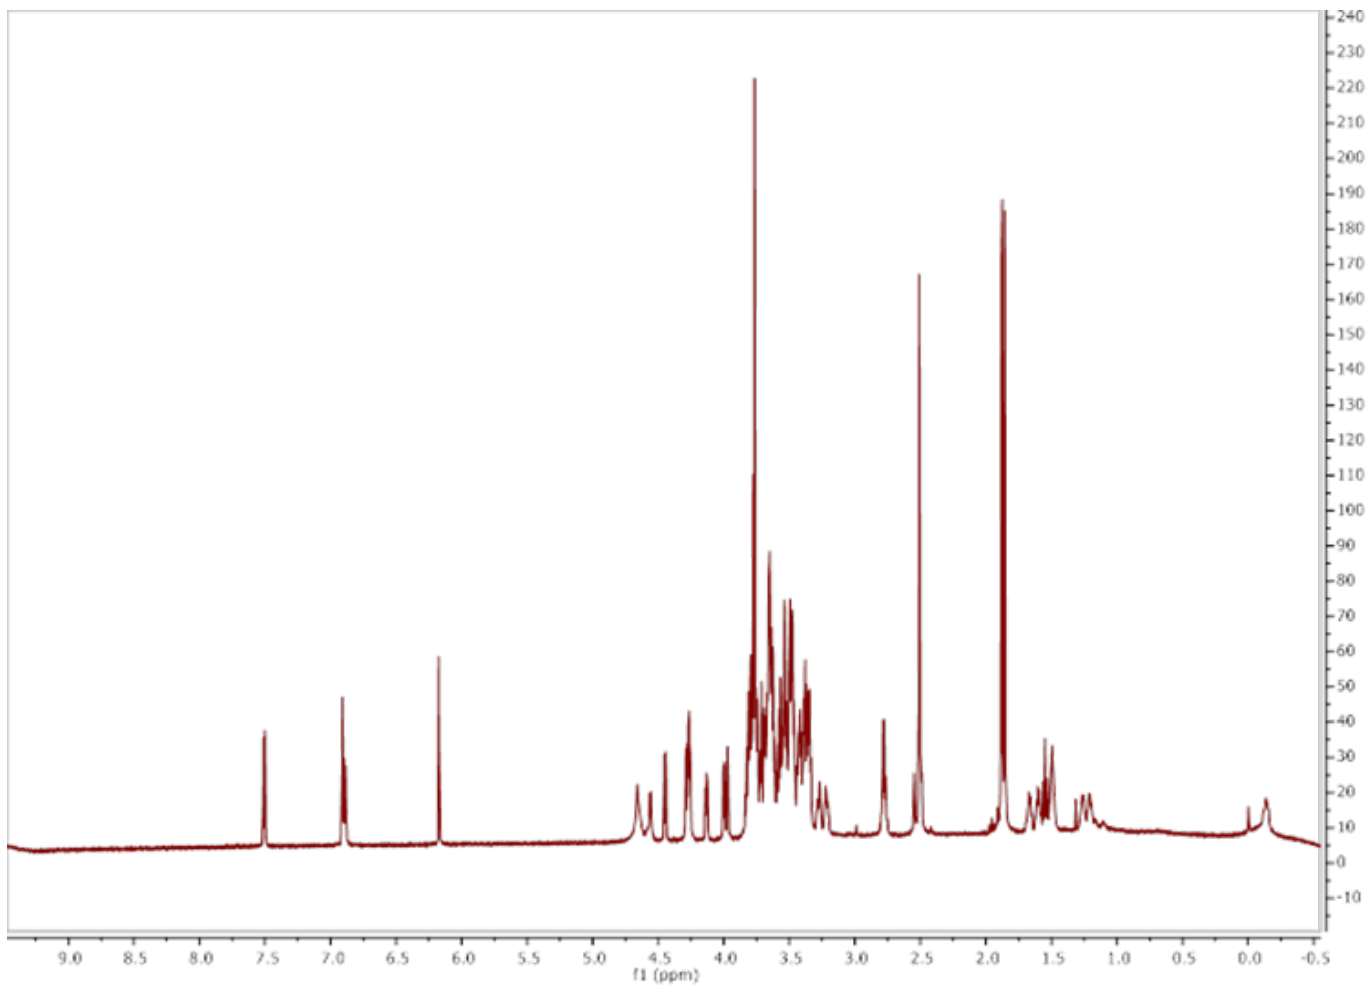

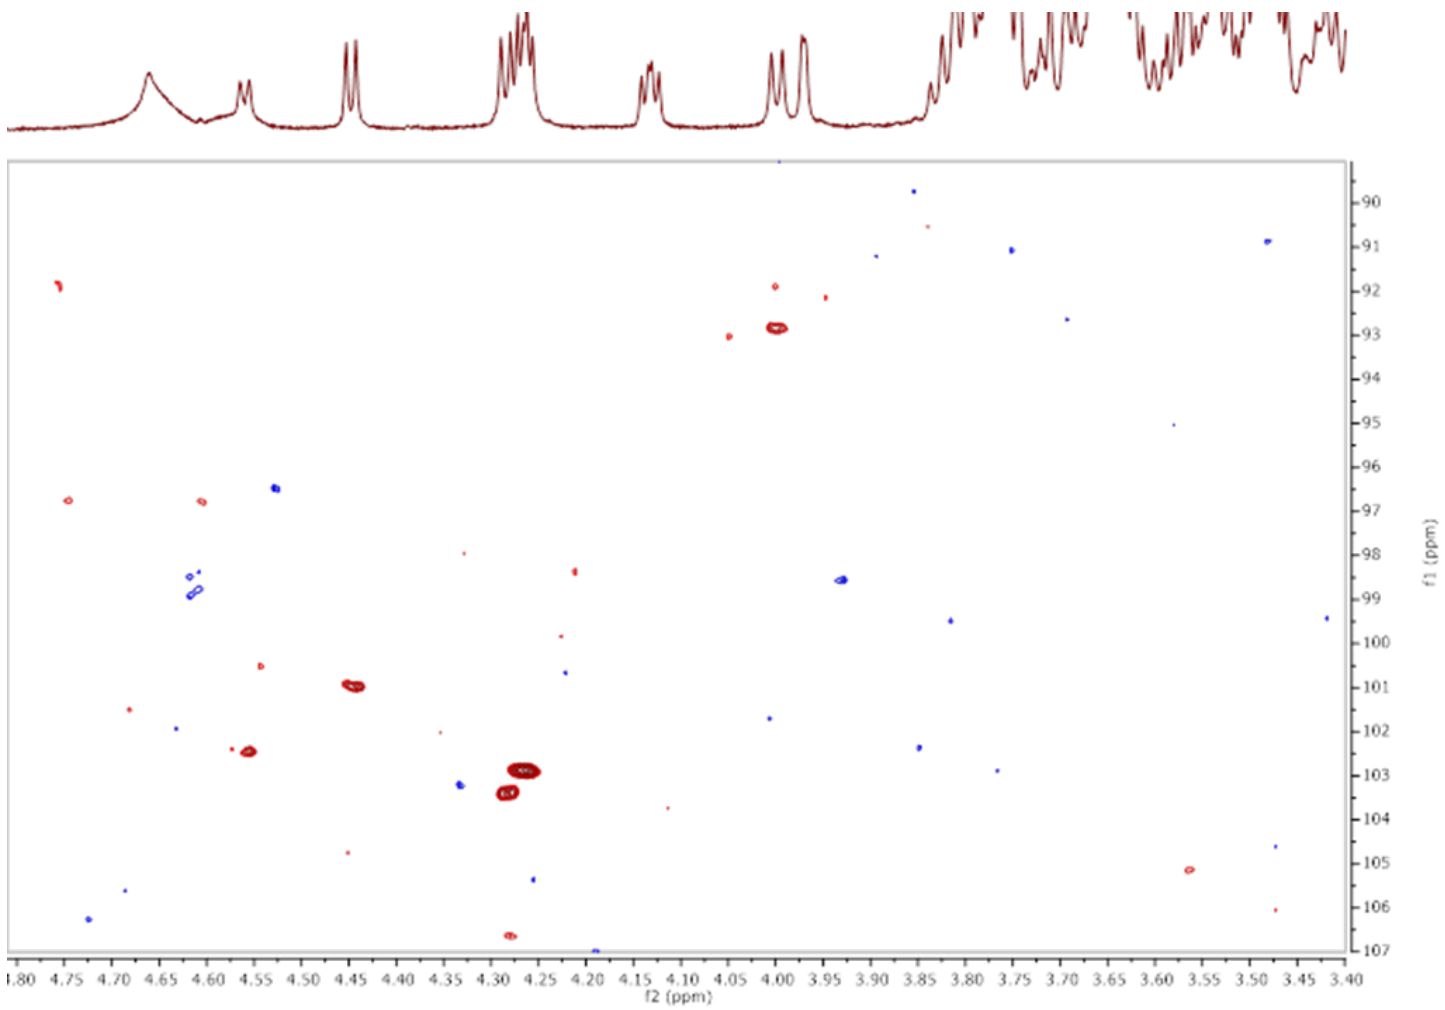

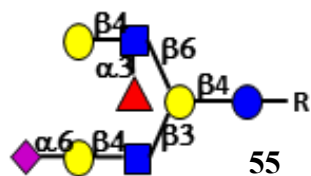

$^1\text{H}$  (600 MHz,  $\text{D}_2\text{O}$ ):  $\delta$  (ppm)

|                  | H1                            | H2   | H3                        | H4   | H5                 | H6   | H7               | H8  | H9  | NHAc                   | $\text{CH}_3$                 |
|------------------|-------------------------------|------|---------------------------|------|--------------------|------|------------------|-----|-----|------------------------|-------------------------------|
| <b>Glc</b>       | 4.00<br>(d, $J = 9.0$ Hz, 1H) | 3.34 | 3.41                      | 3.47 | n/a <sup>[a]</sup> | n/a  | - <sup>[b]</sup> | -   | -   | -                      | -                             |
| <b>Gal</b>       | 4.26                          | 3.43 | 3.54                      | 3.98 | n/a                | n/a  | -                | -   | -   | -                      | -                             |
| <b>GlcNAc</b>    | 4.55<br>(d, $J = 7.3$ Hz, 1H) | 3.64 | 3.50                      | 3.45 | n/a                | n/a  | -                | -   | -   | 1.81 - 1.87<br>(m, 6H) | -                             |
| <b>Gal(2)</b>    | 4.28                          | 3.37 | 3.52                      | 3.76 | n/a                | n/a  | -                | -   | -   | -                      | -                             |
| <b>GlcNAc(2)</b> | 4.44<br>(d, $J = 6.6$ Hz, 1H) | 3.74 | n/a                       | 3.43 | n/a                | n/a  | -                | -   | -   | 1.81 - 1.87<br>(m, 6H) | -                             |
| <b>Gal(3)</b>    | 4.26                          | 3.33 | 3.48                      | 3.73 | n/a                | n/a  | -                | -   | -   | -                      | -                             |
| <b>Neu5Ac</b>    | -                             | -    | 2.50 - eq<br>1.54 - axial | 3.48 | 3.62               | 3.51 | n/a              | n/a | n/a | 1.86<br>(s, 3H)        | -                             |
| <b>Fuc</b>       | 4.92<br>(d, $J = 3.7$ Hz, 1H) | 3.52 | 3.75                      | 3.63 | 4.66               | -    | -                | -   | -   | -                      | 0.98<br>(d, $J = 6.5$ Hz, 3H) |

$^{13}\text{C}$  from BSHSQC (150 MHz,  $\text{D}_2\text{O}$ ):  $\delta$  (ppm)

|                  | C1     |
|------------------|--------|
| <b>Glc</b>       | 92.93  |
| <b>Gal</b>       | 102.84 |
| <b>GlcNAc</b>    | 102.42 |
| <b>Gal(2)</b>    | 103.37 |
| <b>GlcNAc(2)</b> | 100.77 |
| <b>Gal(3)</b>    | 101.67 |
| <b>Fuc</b>       | 98.47  |

<sup>[a]</sup> Not assigned

<sup>[b]</sup> Not applicable

MALDI TOF-MS  $m/z$  calcd  $\text{C}_{78}\text{H}_{122}\text{N}_7\text{O}_{48}\text{Na}_2$  ( $M + 2\text{Na}$ )<sup>+</sup> exact 1970.7122, found 1970.3612.

ARP-VII-10\_PRESAT\_20141121\_01  
ARP-VII-10

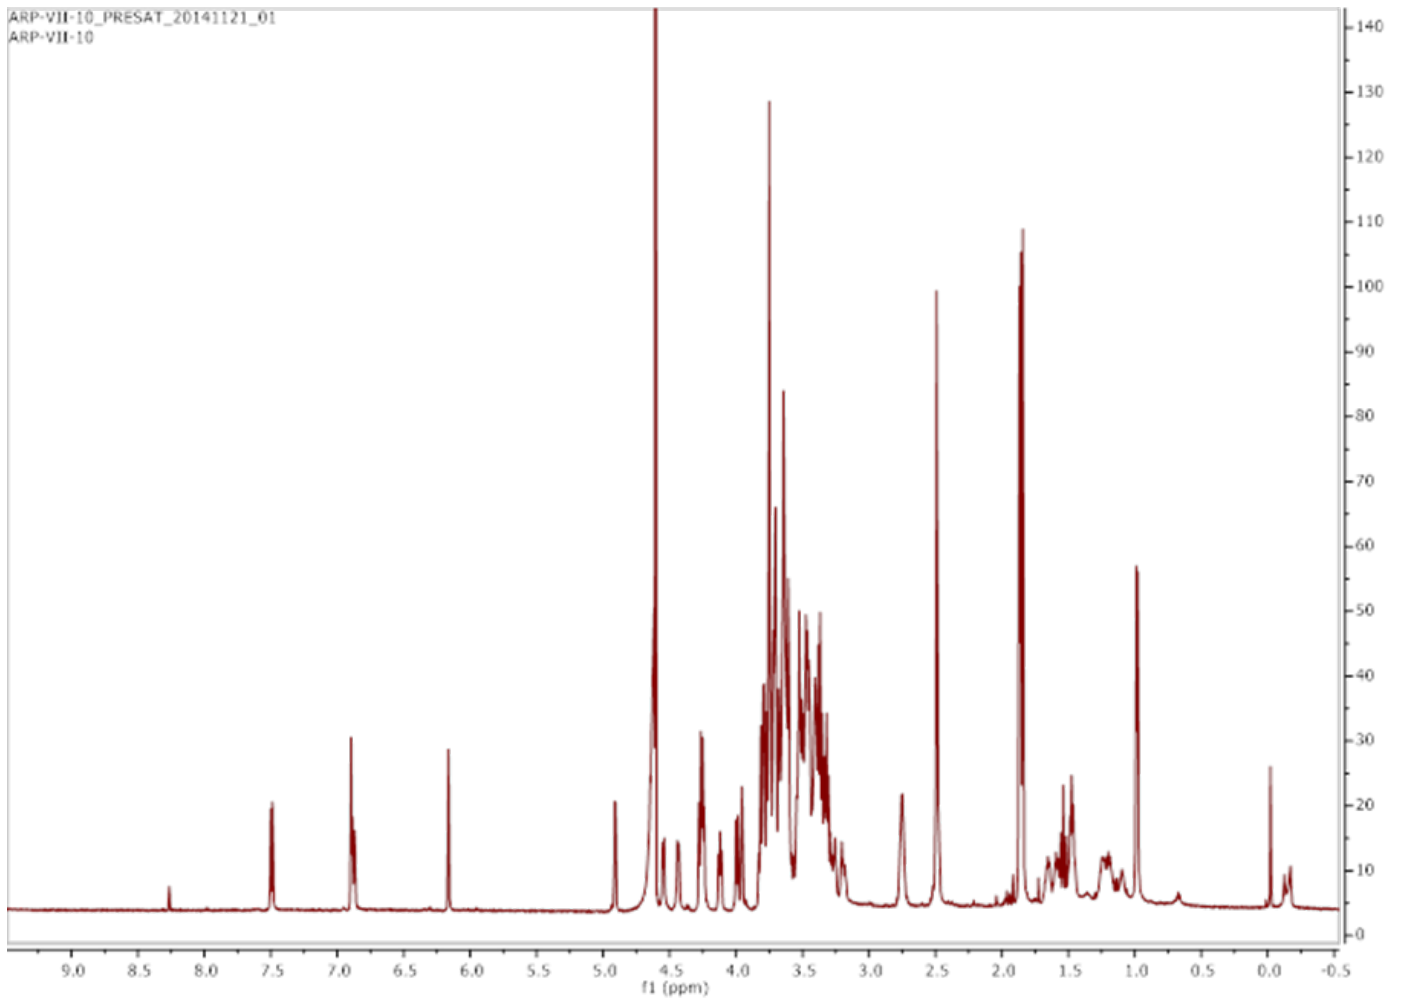

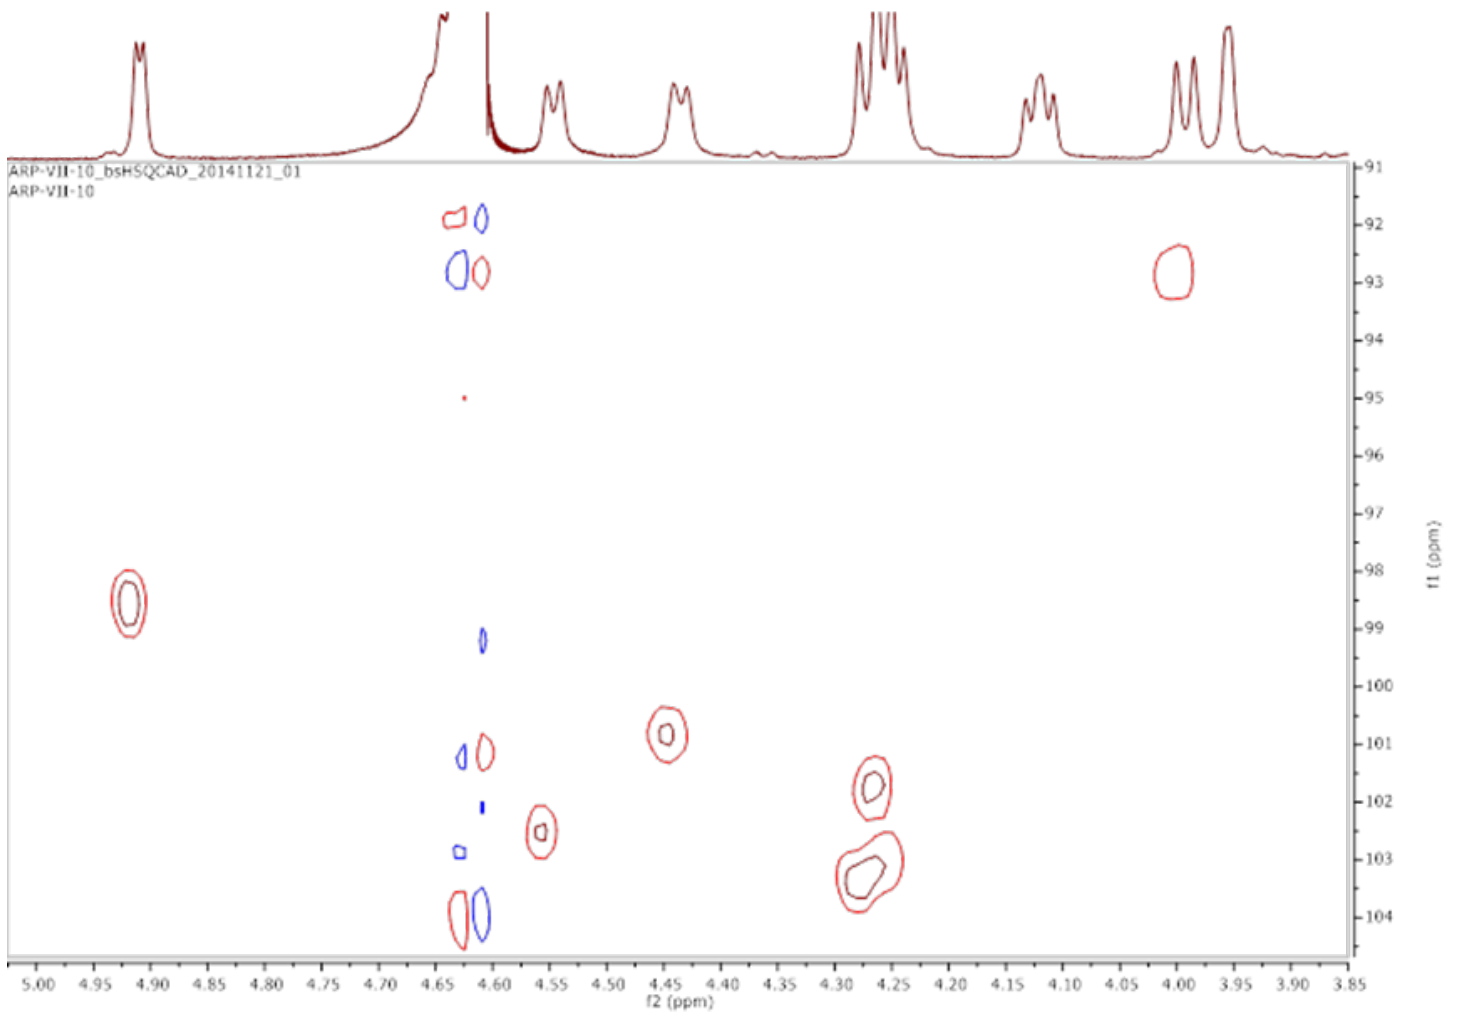

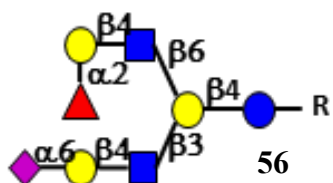

$^1\text{H}$  (600 MHz,  $\text{D}_2\text{O}$ ):  $\delta$  (ppm)

|                  | H1                            | H2   | H3                                                  | H4   | H5                                   | H6   | H7               | H8  | H9  | NHAc            | $\text{CH}_3$                 |
|------------------|-------------------------------|------|-----------------------------------------------------|------|--------------------------------------|------|------------------|-----|-----|-----------------|-------------------------------|
| <b>Glc</b>       | 4.00<br>(d, $J = 9.3$ Hz, 1H) | 3.33 | 3.46                                                | 3.38 | n/a <sup>[a]</sup>                   | n/a  | - <sup>[b]</sup> | -   | -   | -               | -                             |
| <b>Gal</b>       | 4.27<br>(d, $J = 7.7$ Hz, 1H) | 3.41 | 3.54                                                | 3.97 | n/a                                  | n/a  | -                | -   | -   | -               | -                             |
| <b>GlcNAc</b>    | 4.56<br>(d, $J = 6.6$ Hz, 1H) | 3.62 | 3.49                                                | 3.43 | n/a                                  | n/a  | -                | -   | -   | 1.88<br>(s, 6H) | -                             |
| <b>Gal(2)</b>    | 4.29<br>(d, $J = 7.8$ Hz, 1H) | 3.36 | 3.49                                                | 3.75 | n/a                                  | n/a  | -                | -   | -   | -               | -                             |
| <b>GlcNAc(2)</b> | 4.43<br>(d, $J = 8.2$ Hz, 1H) | 3.58 | 3.51                                                | 3.29 | n/a                                  | n/a  | -                | -   | -   | 1.88<br>(s, 6H) | -                             |
| <b>Gal(3)</b>    | 4.36<br>(d, $J = 7.7$ Hz, 1H) | 3.49 | n/a                                                 | 3.69 | n/a                                  | n/a  | -                | -   | -   | -               | -                             |
| <b>Neu5Ac</b>    | -                             | -    | 2.49 - eq<br>1.56 - axia<br>(dd, $J = 12.2$ Hz, 1H) | 4.80 | 3.62                                 | 3.51 | n/a              | n/a | n/a | 1.86<br>(s, 3H) | -                             |
| <b>Fuc</b>       | 5.13<br>(s, 1H)               | 3.62 | n/a                                                 | n/a  | 4.04<br>(dd, $J = 13.5, 6.7$ Hz, 1H) | -    | -                | -   | -   | -               | 1.06<br>(d, $J = 6.5$ Hz, 3H) |

$^{13}\text{C}$  from BSHSQC (150 MHz,  $\text{D}_2\text{O}$ ):  $\delta$  (ppm)

|                  | C1     |
|------------------|--------|
| <b>Glc</b>       | 92.84  |
| <b>Gal</b>       | 102.99 |
| <b>GlcNAc</b>    | 102.42 |
| <b>Gal(2)</b>    | 103.39 |
| <b>GlcNAc(2)</b> | 101.02 |
| <b>Gal(3)</b>    | 100.20 |
| <b>Fuc</b>       | 99.23  |

<sup>[a]</sup> Not assigned

<sup>[b]</sup> Not applicable

MALDI TOF-MS  $m/z$  calcd  $\text{C}_{78}\text{H}_{122}\text{N}_7\text{O}_{48}\text{Na}_2$  ( $\text{M} + 2\text{Na}$ )<sup>+</sup> exact 1970.7122, found 1970.1387.

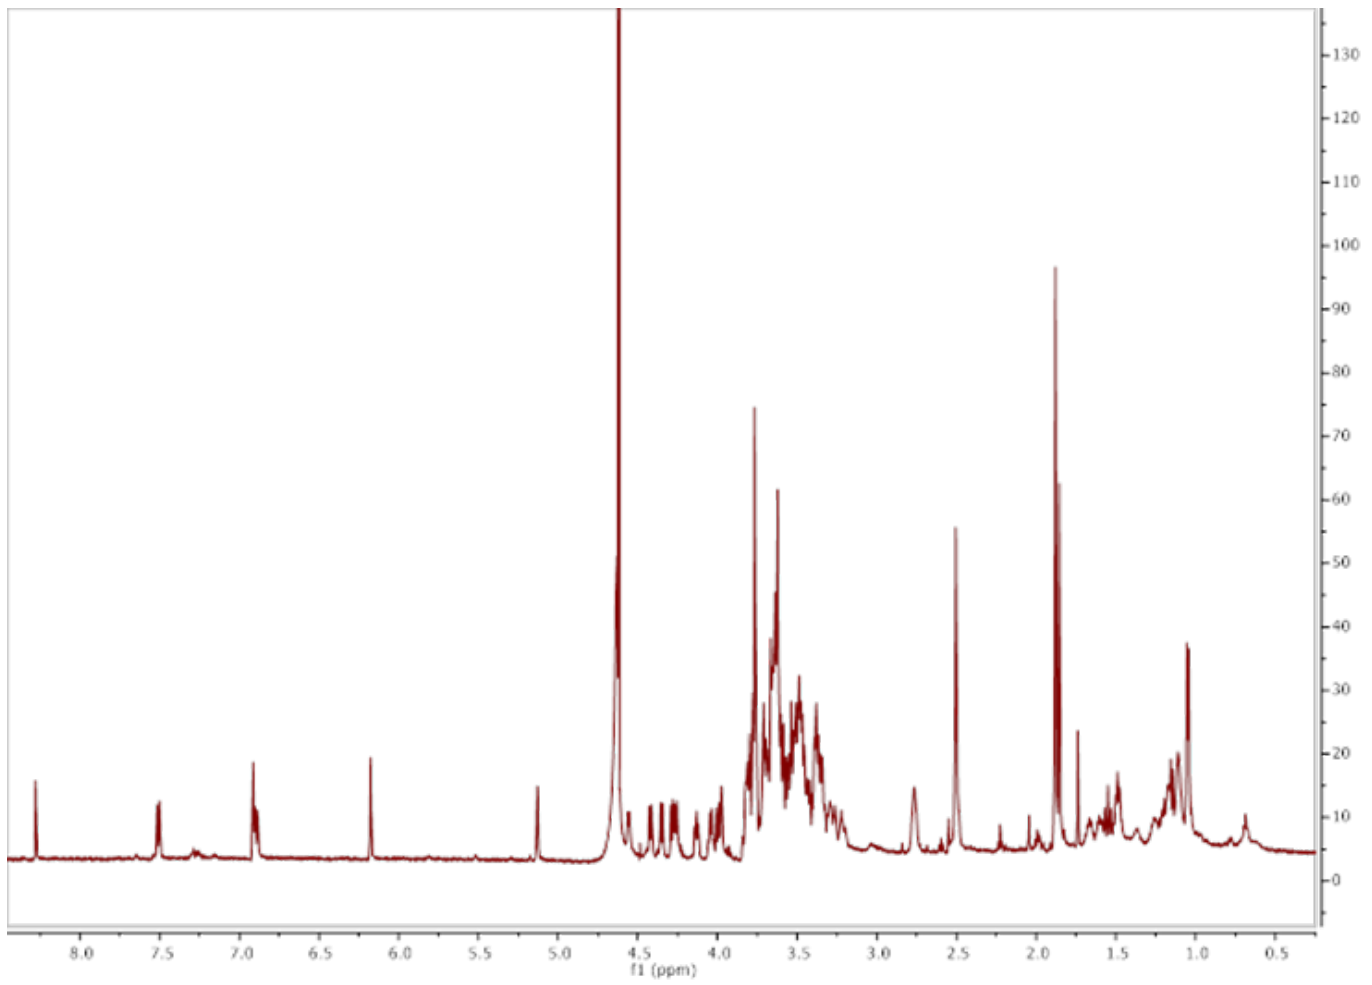

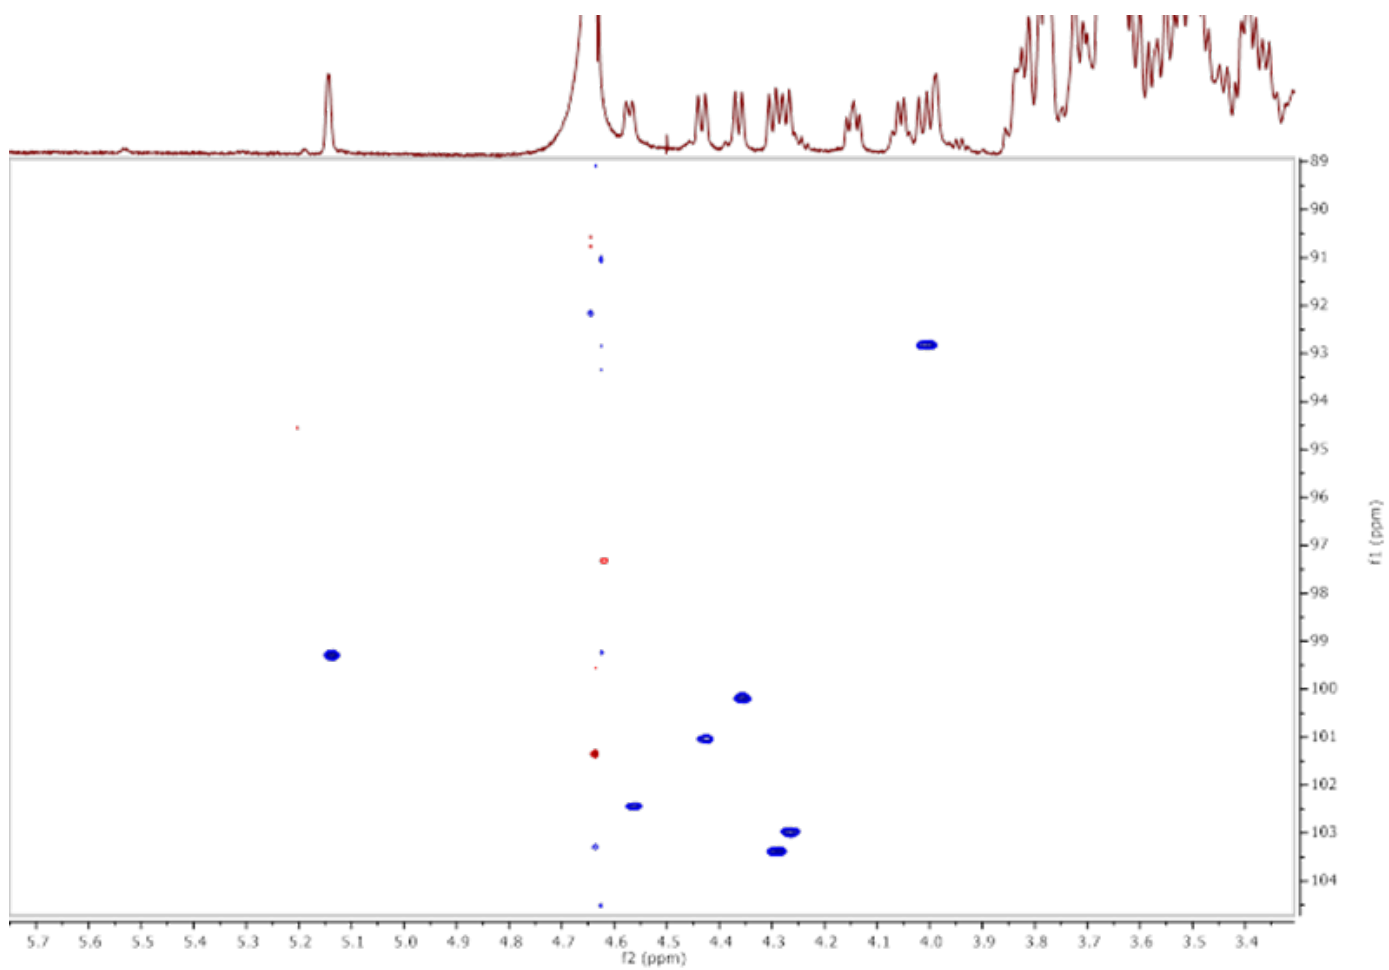



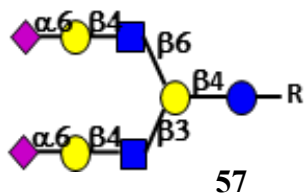

$^1\text{H}$  (800 MHz,  $\text{D}_2\text{O}$ ):  $\delta$  (ppm)

|                  | H1                            | H2   | H3                        | H4   | H5                 | H6   | H7               | H8  | H9  | NHAc                    |
|------------------|-------------------------------|------|---------------------------|------|--------------------|------|------------------|-----|-----|-------------------------|
| <b>Glc</b>       | 4.00<br>(d, $J = 9.3$ Hz, 1H) | 3.37 | 3.43                      | 3.49 | n/a <sup>[a]</sup> | n/a  | - <sup>[b]</sup> | -   | -   | -                       |
| <b>Gal</b>       | 4.28                          | 3.44 | 3.56                      | 3.99 | n/a                | n/a  | -                | -   | -   | -                       |
| <b>GlcNAc</b>    | 4.57<br>(d, $J = 7.4$ Hz, 1H) | 3.64 | 3.51                      | 3.42 | n/a                | n/a  | -                | -   | -   | 1.86 – 1.91<br>(m, 12H) |
| <b>Gal(2)</b>    | 4.30<br>(d, $J = 9.0$ Hz, 1H) | 3.38 | 3.52                      | 3.76 | n/a                | n/a  | -                | -   | -   | -                       |
| <b>GlcNAc(2)</b> | 4.48<br>(d, $J = 6.8$ Hz, 1H) | 3.58 | n/a                       | 3.43 | n/a                | n/a  | -                | -   | -   | 1.86 – 1.91<br>(m, 12H) |
| <b>Gal(3)</b>    | 4.23<br>(d, $J = 7.6$ Hz, 1H) | 3.37 | 3.48                      | 3.75 | n/a                | n/a  | -                | -   | -   | -                       |
| <b>Neu5Ac</b>    | -                             | -    | 2.50 - eq<br>1.54 - axial | 3.48 | 3.62               | 3.51 | n/a              | n/a | n/a | 1.86 – 1.91<br>(m, 12H) |
| <b>Neu5Ac</b>    | -                             | -    | 2.50 - eq<br>1.54 - axial | 3.48 | 3.62               | 3.51 | n/a              | n/a | n/a | 1.86 – 1.91<br>(m, 12H) |

$^{13}\text{C}$  from BSHSQC (200 MHz,  $\text{D}_2\text{O}$ ):  $\delta$  (ppm)

|                  | C1     |
|------------------|--------|
| <b>Glc</b>       | 92.88  |
| <b>Gal</b>       | 102.91 |
| <b>GlcNAc</b>    | 102.55 |
| <b>Gal(2)</b>    | 103.37 |
| <b>GlcNAc(2)</b> | 100.80 |
| <b>Gal(3)</b>    | 103.38 |

<sup>[a]</sup> Not assigned

<sup>[b]</sup> Not applicable

MALDI TOF-MS  $m/z$  calcd  $\text{C}_{83}\text{H}_{128}\text{N}_8\text{O}_{52}\text{Na}$  ( $\text{M} + \text{Na}$ )<sup>-</sup> exact 2091.7526, found 2092.4038.

ARP-VJ-11\_PRESAT\_20140814\_01  
ARP-VI-11

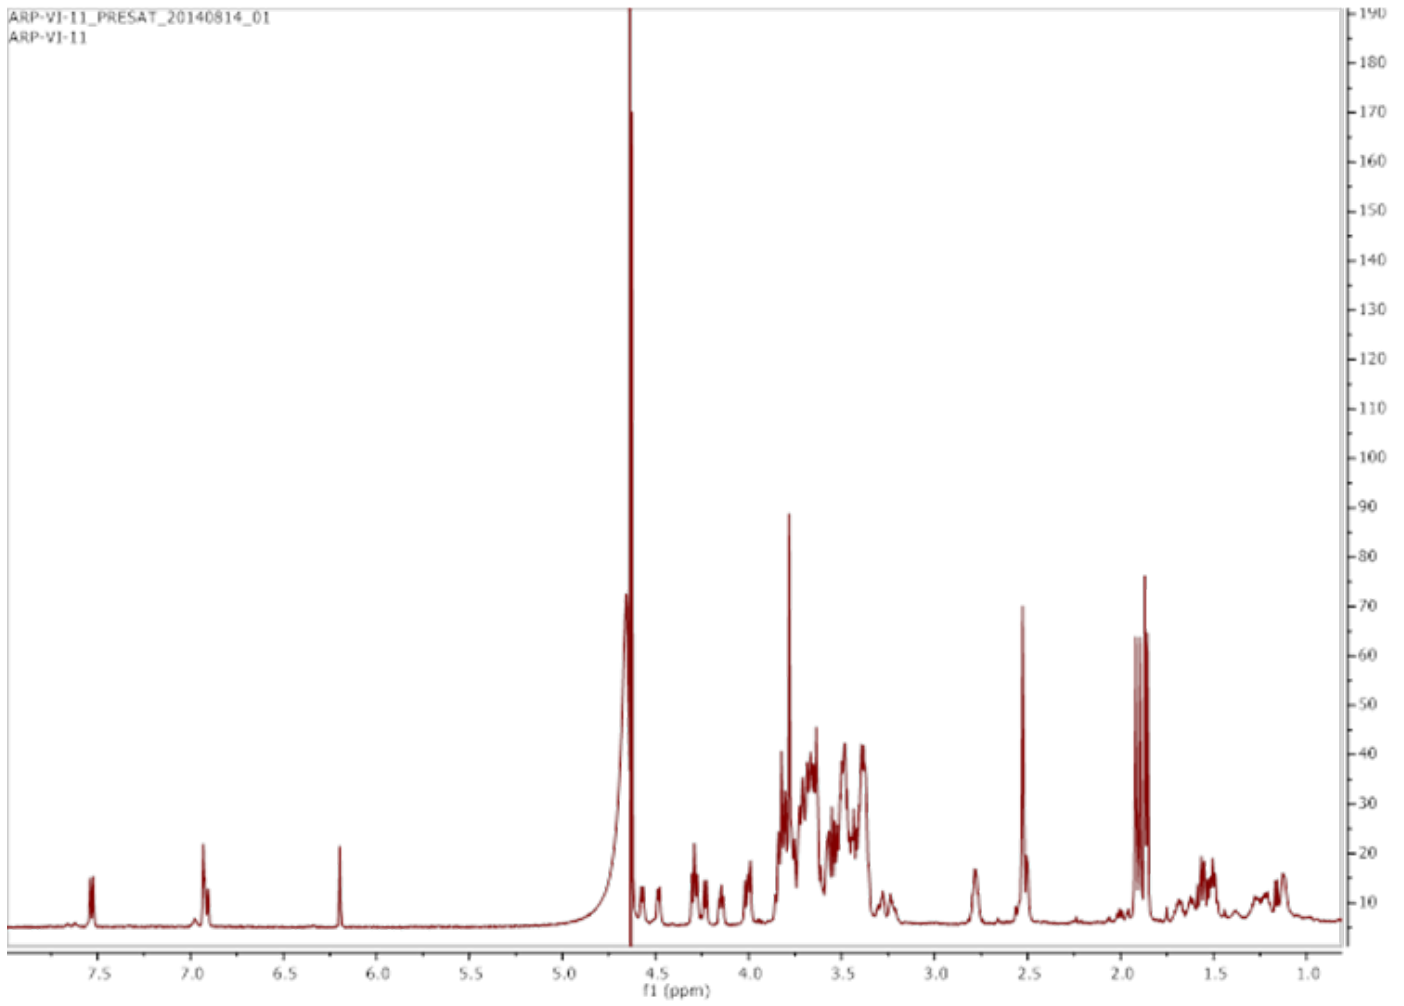

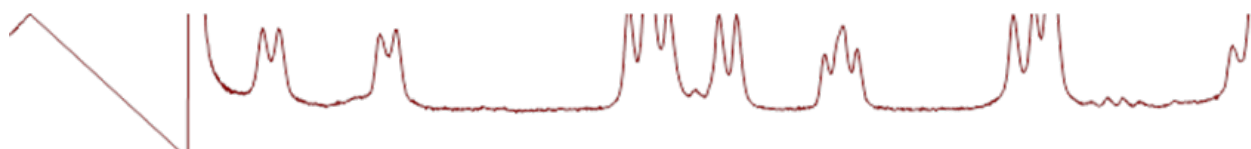

ARP-VI-11\_gHSQCAD\_20140816\_01  
ARP-VI-11

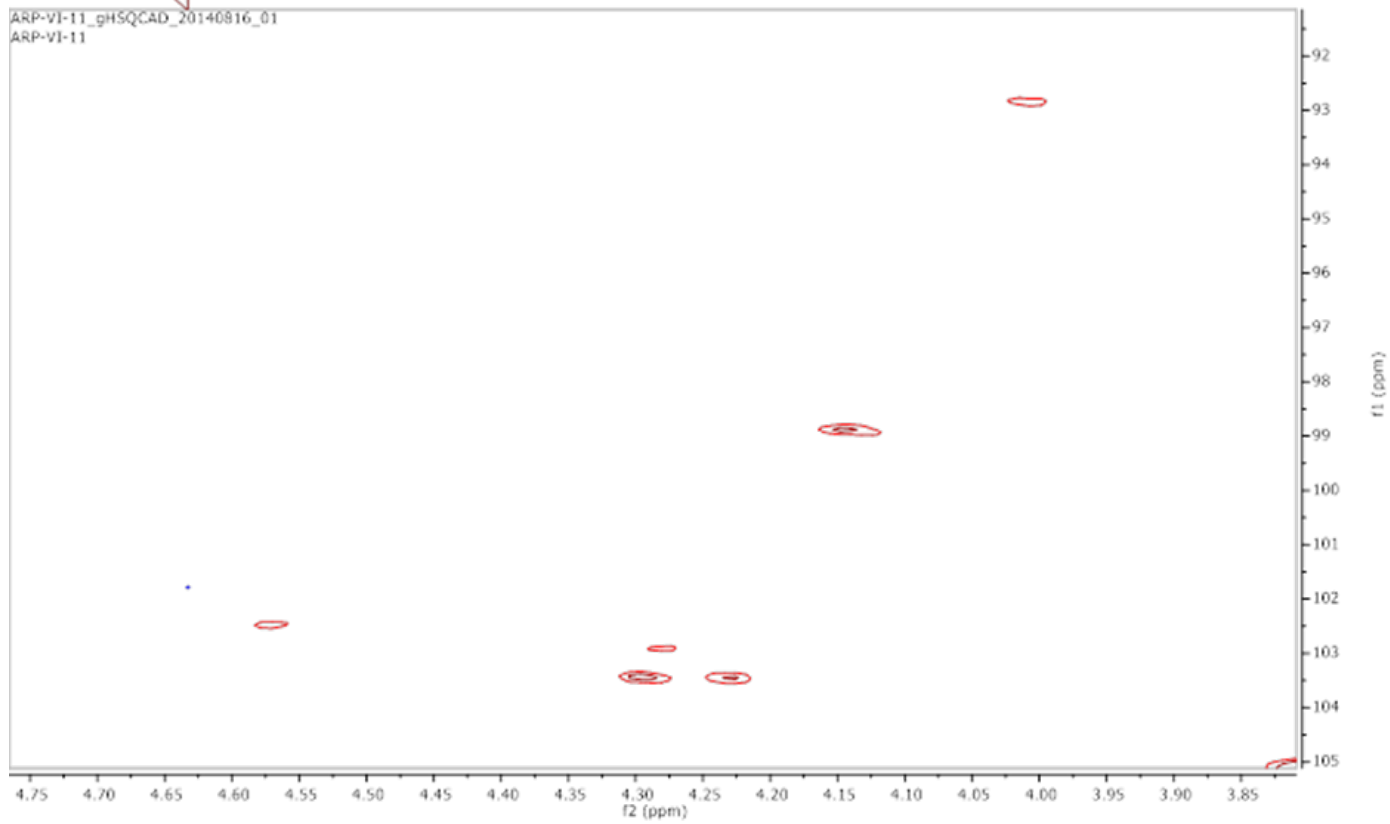

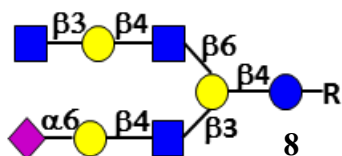

$^1\text{H}$  (600 MHz,  $\text{D}_2\text{O}$ ):  $\delta$  (ppm)

|                  | H1                               | H2   | H3                                                   | H4                            | H5                 | H6   | H7               | H8  | H9  | NHAc                    |
|------------------|----------------------------------|------|------------------------------------------------------|-------------------------------|--------------------|------|------------------|-----|-----|-------------------------|
| <b>Glc</b>       | 4.00<br>(d, $J = 9.2$<br>Hz, 1H) | 3.36 | 3.47                                                 | 3.40                          | n/a <sup>[a]</sup> | n/a  | - <sup>[b]</sup> | -   | -   | -                       |
| <b>Gal</b>       | 4.26<br>(d, $J = 7.8$<br>Hz, 1H) | 3.41 | 3.55                                                 | 3.98<br>(d, $J = 3.1$ Hz, 2H) | n/a                | n/a  | -                | -   | -   | -                       |
| <b>GlcNAc</b>    | 4.56<br>(d, $J = 7.3$<br>Hz, 1H) | 3.64 | 3.49                                                 | 3.44                          | n/a                | n/a  | -                | -   | -   | 1.91 - 1.84<br>(m, 12H) |
| <b>Gal(2)</b>    | 4.28<br>d, $J = 7.8$<br>Hz, 1H)  | 3.38 | 3.50                                                 | 3.76                          | n/a                | n/a  | -                | -   | -   | -                       |
| <b>GlcNAc(2)</b> | 4.43<br>(d, $J = 7.9$<br>Hz, 1H) | 3.57 | 3.50                                                 | 3.42                          | n/a                | n/a  | -                | -   | -   | 1.91 - 1.84<br>(m, 12H) |
| <b>Gal(3)</b>    | 4.28<br>(d, $J = 7.9$<br>Hz, 1H) | 3.38 | 3.55                                                 | 3.98<br>(d, $J = 3.1$ Hz, 2H) | n/a                | n/a  | -                | -   | -   | -                       |
| <b>GlcNAc(3)</b> | 4.52<br>(d, $J = 8.4$<br>Hz, 1H) | 3.60 | 3.40                                                 | 3.28                          | n/a                | n/a  | -                | -   | -   | 1.91 - 1.84<br>(m, 12H) |
| <b>Neu5Ac</b>    | -                                | -    | 2.51 - eq<br>1.56 - axial<br>(dd, $J = 12.2$ Hz, 1H) | 3.49                          | 3.62               | 3.51 | n/a              | n/a | n/a | 1.91 - 1.84<br>(m, 12H) |

$^{13}\text{C}$  from BSHSQC (150 MHz,  $\text{D}_2\text{O}$ ):  $\delta$  (ppm)

|                  | C1     |
|------------------|--------|
| <b>Glc</b>       | 92.84  |
| <b>Gal</b>       | 102.84 |
| <b>GlcNAc</b>    | 102.44 |
| <b>Gal(2)</b>    | 103.39 |
| <b>GlcNAc(2)</b> | 100.92 |
| <b>Gal(3)</b>    | 102.84 |
| <b>GlcNAc(3)</b> | 102.70 |

<sup>[a]</sup> Not assigned

<sup>[b]</sup> Not applicable

MALDI TOF-MS  $m/z$  calcd  $\text{C}_{80}\text{H}_{125}\text{N}_8\text{O}_{49}\text{Na}_2$  ( $\text{M} + 2\text{Na}$ )<sup>+</sup> exact 2027.7336, found 2027.4097.

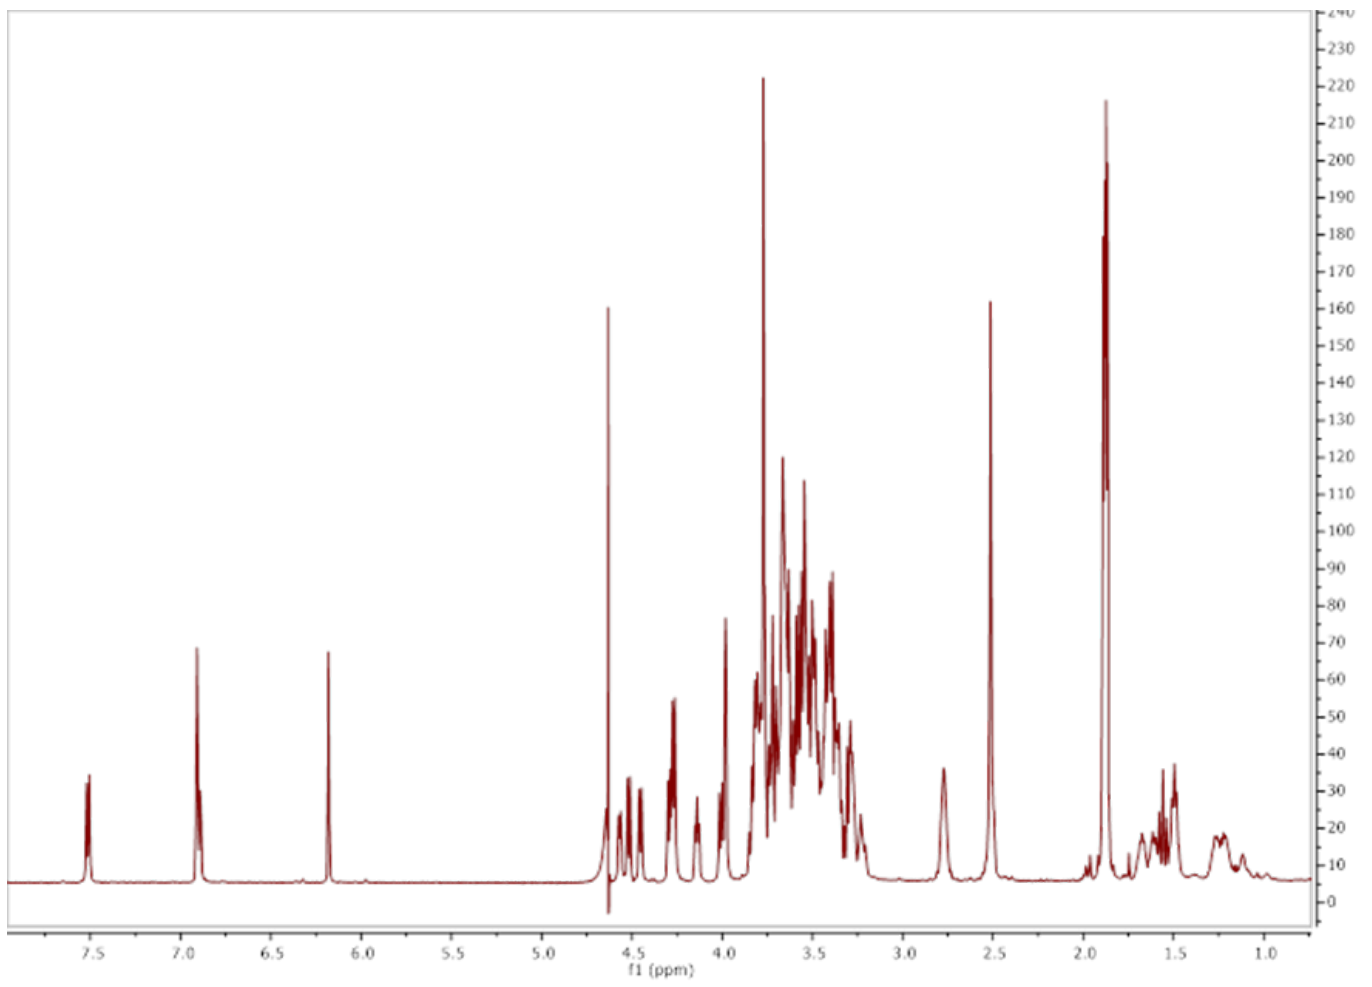

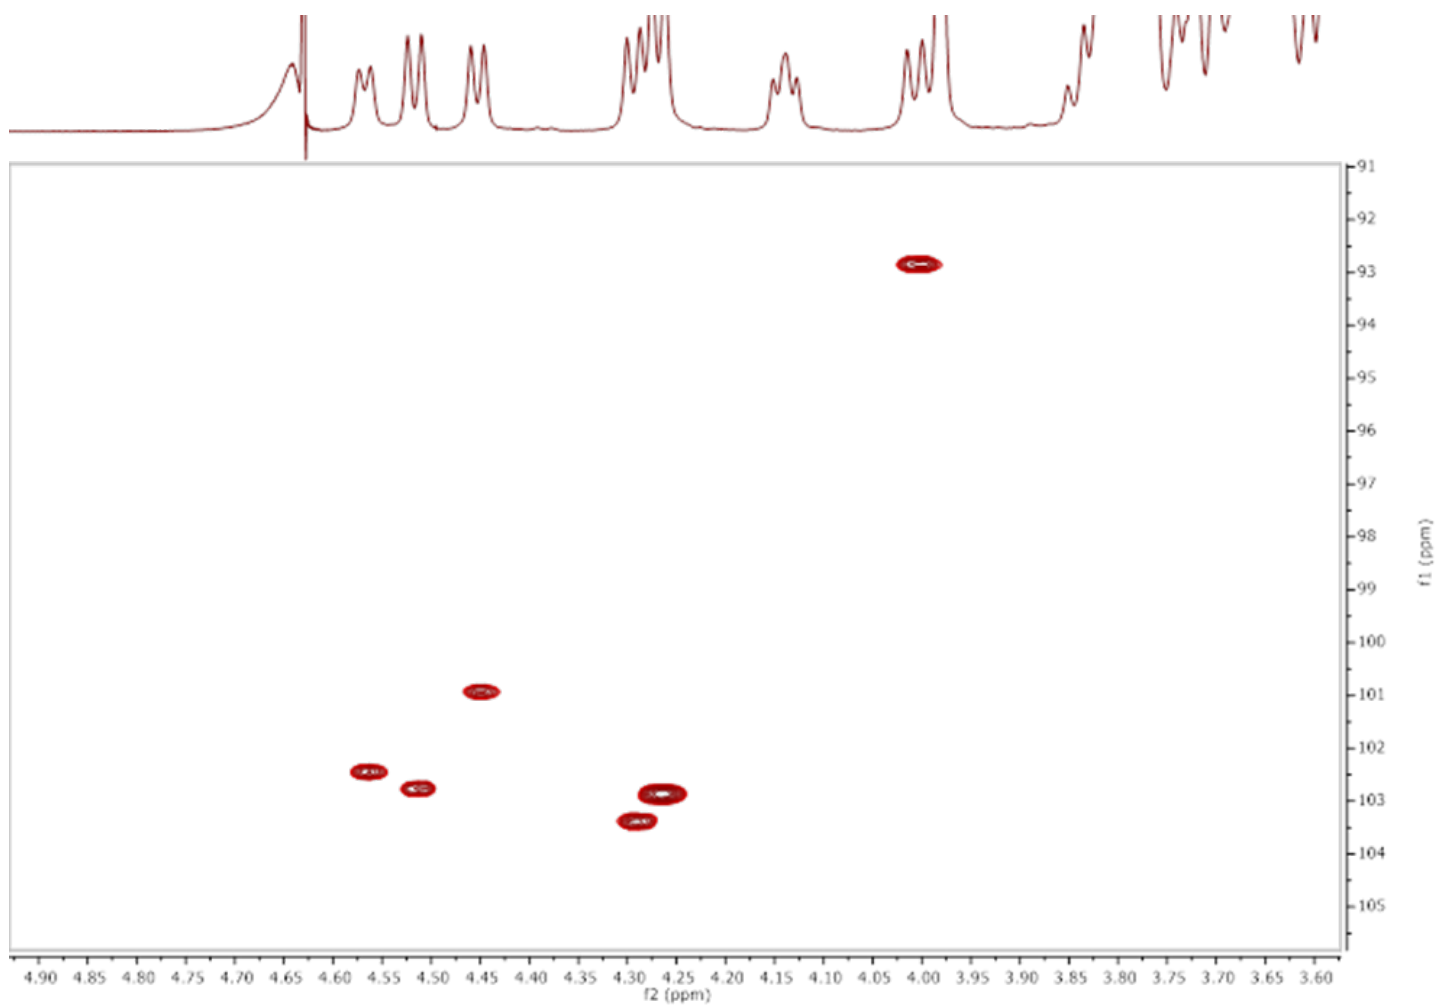

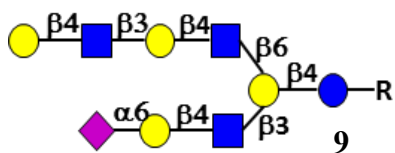

$^1\text{H}$  (600 MHz,  $\text{D}_2\text{O}$ ):  $\delta$  (ppm)

|                  | H1                            | H2   | H3                        | H4   | H5                 | H6   | H7               | H8  | H9  | NHAc                    |
|------------------|-------------------------------|------|---------------------------|------|--------------------|------|------------------|-----|-----|-------------------------|
| <b>Glc</b>       | 4.00                          | 3.35 | 3.47                      | 3.40 | n/a <sup>[a]</sup> | n/a  | - <sup>[b]</sup> | -   | -   | -                       |
| <b>Gal</b>       | 4.26                          | 3.41 | 3.54                      | 3.97 | n/a                | n/a  | -                | -   | -   | -                       |
| <b>GlcNAc</b>    | 4.56<br>(d, $J = 6.5$ Hz, 1H) | 3.64 | 3.48                      | 3.44 | n/a                | n/a  | -                | -   | -   | 1.91 - 1.84<br>(m, 12H) |
| <b>Gal(2)</b>    | 4.30                          | 3.37 | 3.49                      | 3.75 | n/a                | n/a  | -                | -   | -   | -                       |
| <b>GlcNAc(2)</b> | 4.45<br>(d, $J = 8.5$ Hz, 1H) | 3.56 | 3.51                      | 3.41 | n/a                | n/a  | -                | -   | -   | 1.91 - 1.84<br>(m, 12H) |
| <b>Gal(3)</b>    | 4.26                          | 3.41 | 3.54                      | 3.97 | n/a                | n/a  | -                | -   | -   | -                       |
| <b>GlcNAc(3)</b> | 4.52<br>(d, $J = 8.0$ Hz, 1H) | 3.65 | 3.56                      | 3.41 | n/a                | n/a  | -                | -   | -   | 1.91 - 1.84<br>(m, 12H) |
| <b>Gal(4)</b>    | 4.28                          | 3.37 | 3.49                      | 3.75 | n/a                | n/a  | -                | -   | -   | -                       |
| <b>Neu5Ac</b>    | -                             | -    | 2.51 – eq<br>1.56 – axial | 3.49 | 3.62               | 3.51 | n/a              | n/a | n/a | 1.91 - 1.84<br>(m, 12H) |

$^{13}\text{C}$  from BSHSQC (150 MHz,  $\text{D}_2\text{O}$ ):  $\delta$  (ppm)

|                  | C1     |
|------------------|--------|
| <b>Glc</b>       | 92.84  |
| <b>Gal</b>       | 102.86 |
| <b>GlcNAc</b>    | 102.53 |
| <b>Gal(2)</b>    | 102.86 |
| <b>GlcNAc(2)</b> | 100.95 |
| <b>Gal(3)</b>    | 102.86 |
| <b>GlcNAc(3)</b> | 102.66 |
| <b>Gal(4)</b>    | 103.43 |

<sup>[a]</sup> Not assigned

<sup>[b]</sup> Not applicable

MALDI TOF-MS  $m/z$  calcd  $\text{C}_{86}\text{H}_{135}\text{N}_8\text{O}_{54} \text{Na}_2$  ( $M + 2\text{Na}$ )<sup>+</sup> exact 2189.7864, found 2189.6707.

ARP-VII-83\_PRESAT\_20150211\_01  
ARP-VII-83

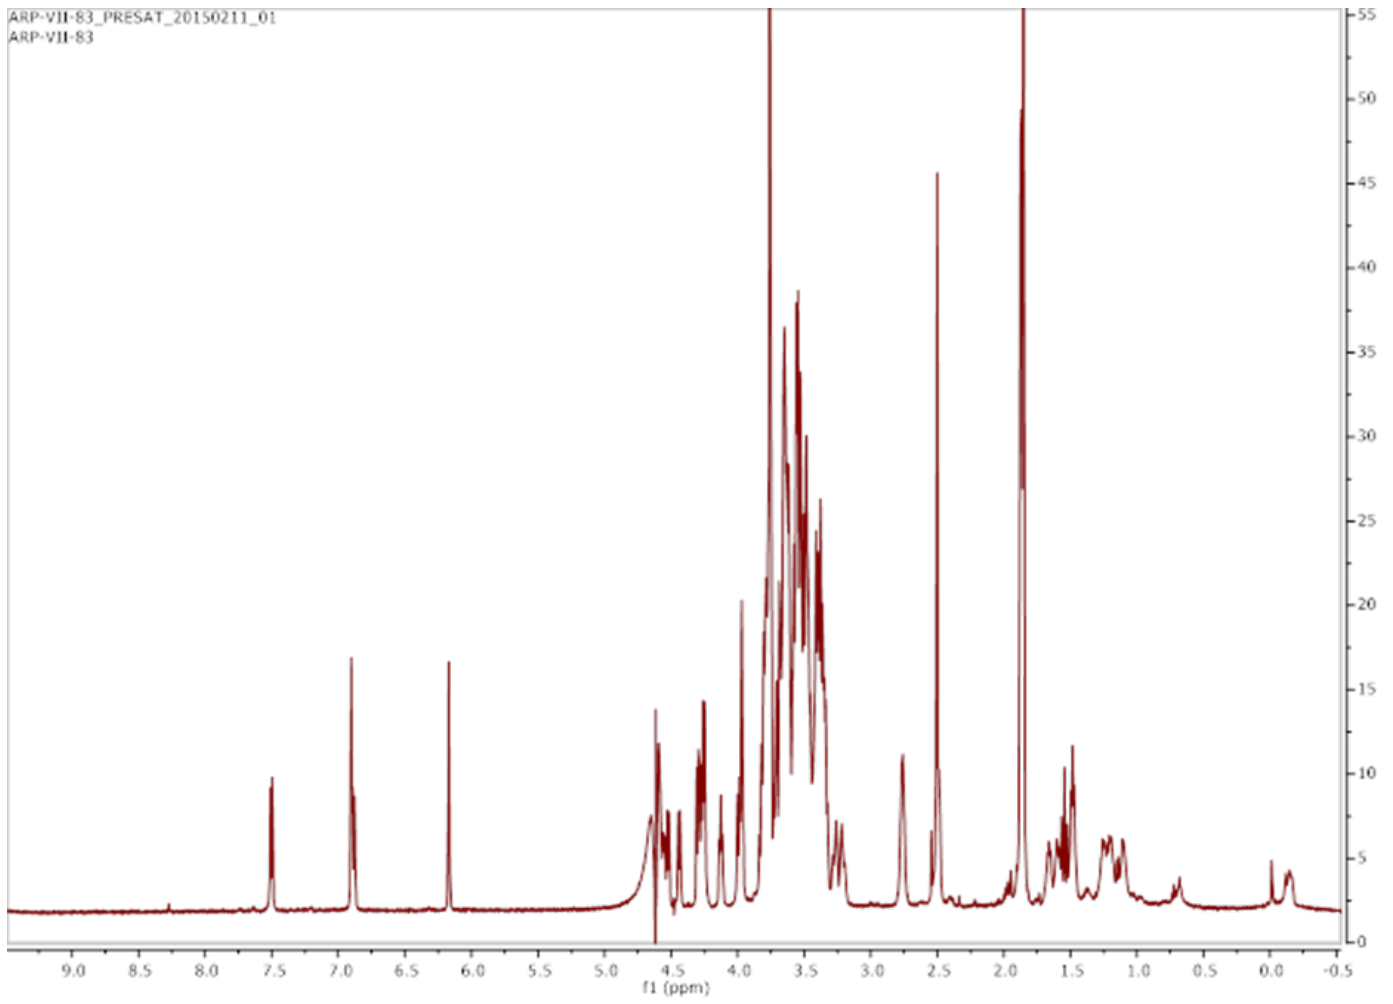



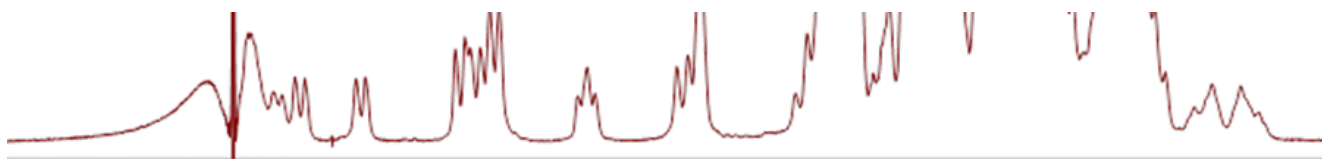

ARP-VII-83\_bsHSQCAD\_20150212\_01  
ARP-VII-83

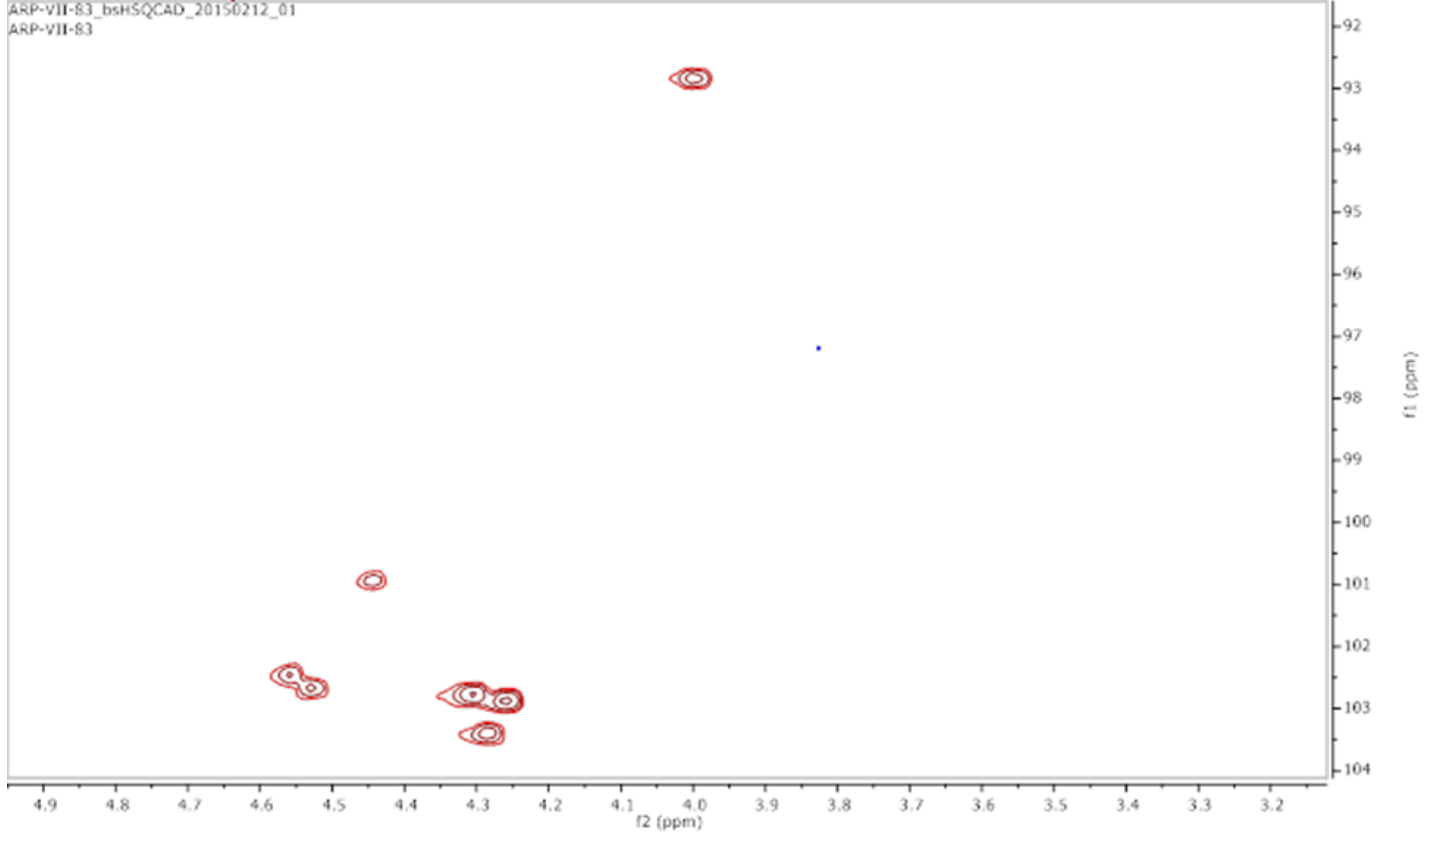

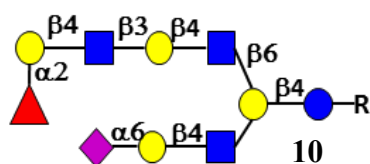

$^1\text{H}$  (800 MHz,  $\text{D}_2\text{O}$ ):  $\delta$  (ppm)

|                  | H1                            | H2   | H3                                                   | H4   | H5                            | H6           | H7               | H8  | H9  | $\text{CH}_3$                 | NHAc                    |
|------------------|-------------------------------|------|------------------------------------------------------|------|-------------------------------|--------------|------------------|-----|-----|-------------------------------|-------------------------|
| <b>Glc</b>       | 4.00<br>(d, $J = 9.2$ Hz, 1H) | 3.34 | 3.46                                                 | 3.39 | n/a <sup>[a]</sup>            | n/a          | - <sup>[b]</sup> | -   | -   | -                             | -                       |
| <b>Gal</b>       | 4.26<br>(d, $J = 7.9$ Hz, 2H) | 3.41 | 3.53                                                 | 3.96 | n/a                           | 3.80<br>3.66 | -                | -   | -   | -                             | -                       |
| <b>GlcNAc</b>    | 4.56<br>(d, $J = 7.5$ Hz, 1H) | 3.62 | 3.48                                                 | 3.43 | n/a                           | n/a          | -                | -   | -   | -                             | 1.91 - 1.84<br>(m, 12H) |
| <b>Gal(2)</b>    | 4.28<br>(d, $J = 7.9$ Hz, 1H) | 3.36 | 3.50                                                 | 3.75 | n/a                           | n/a          | -                | -   | -   | -                             | -                       |
| <b>GlcNAc(2)</b> | 4.44<br>(d, $J = 8.3$ Hz, 1H) | 3.56 | 3.49                                                 | 3.41 | n/a                           | n/a          | -                | -   | -   | -                             | 1.91 - 1.84<br>(m, 12H) |
| <b>Gal(3)</b>    | 4.26<br>(d, $J = 7.9$ Hz, 2H) | 3.41 | 3.53                                                 | 3.96 | n/a                           | n/a          | -                | -   | -   | -                             | -                       |
| <b>GlcNAc(3)</b> | 4.53<br>(d, $J = 8.5$ Hz, 1H) | 3.64 | 3.51                                                 | 3.29 | n/a                           | n/a          | -                | -   | -   | -                             | 1.91 - 1.84<br>(m, 12H) |
| <b>Gal(4)</b>    | 4.37<br>(d, $J = 7.7$ Hz, 1H) | 3.56 | 3.62                                                 | 3.70 | n/a                           | n/a          | -                | -   | -   | -                             | -                       |
| <b>Fuc</b>       | 5.13<br>(d, $J = 3.4$ Hz, 1H) | 3.62 | n/a                                                  | n/a  | 4.04<br>(q, $J = 6.6$ Hz, 1H) | -            | -                | -   | -   | 1.06<br>(d, $J = 6.6$ Hz, 3H) | -                       |
| <b>Neu5Ac</b>    | -                             | -    | 2.49 – eq<br>1.56 – axial<br>(dd, $J = 12.2$ Hz, 1H) | 3.49 | 3.62                          | 3.51         | n/a              | n/a | n/a | -                             | 1.91 - 1.84<br>(m, 12H) |

$^{13}\text{C}$  from BSHSQC (200 MHz,  $\text{D}_2\text{O}$ ):  $\delta$  (ppm)

|                  | C1     |
|------------------|--------|
| <b>Glc</b>       | 92.90  |
| <b>Gal</b>       | 102.84 |
| <b>GlcNAc</b>    | 102.46 |
| <b>Gal(2)</b>    | 103.36 |
| <b>GlcNAc(2)</b> | 100.87 |
| <b>Gal(3)</b>    | 102.84 |
| <b>GlcNAc(3)</b> | 102.70 |
| <b>Gal(4)</b>    | 100.17 |
| <b>Fuc</b>       | 99.27  |

<sup>[a]</sup> Not assigned

<sup>[b]</sup> Not applicable

MALDI TOF-MS  $m/z$  calcd  $\text{C}_{86}\text{H}_{135}\text{N}_8\text{O}_{54} \text{Na}_2$  ( $\text{M} + 2\text{Na}$ )<sup>+</sup> exact 2335.8444, found 2335.5073.

ARP-VII-92\_PRESAT\_20150215\_01  
ARP-VII-92

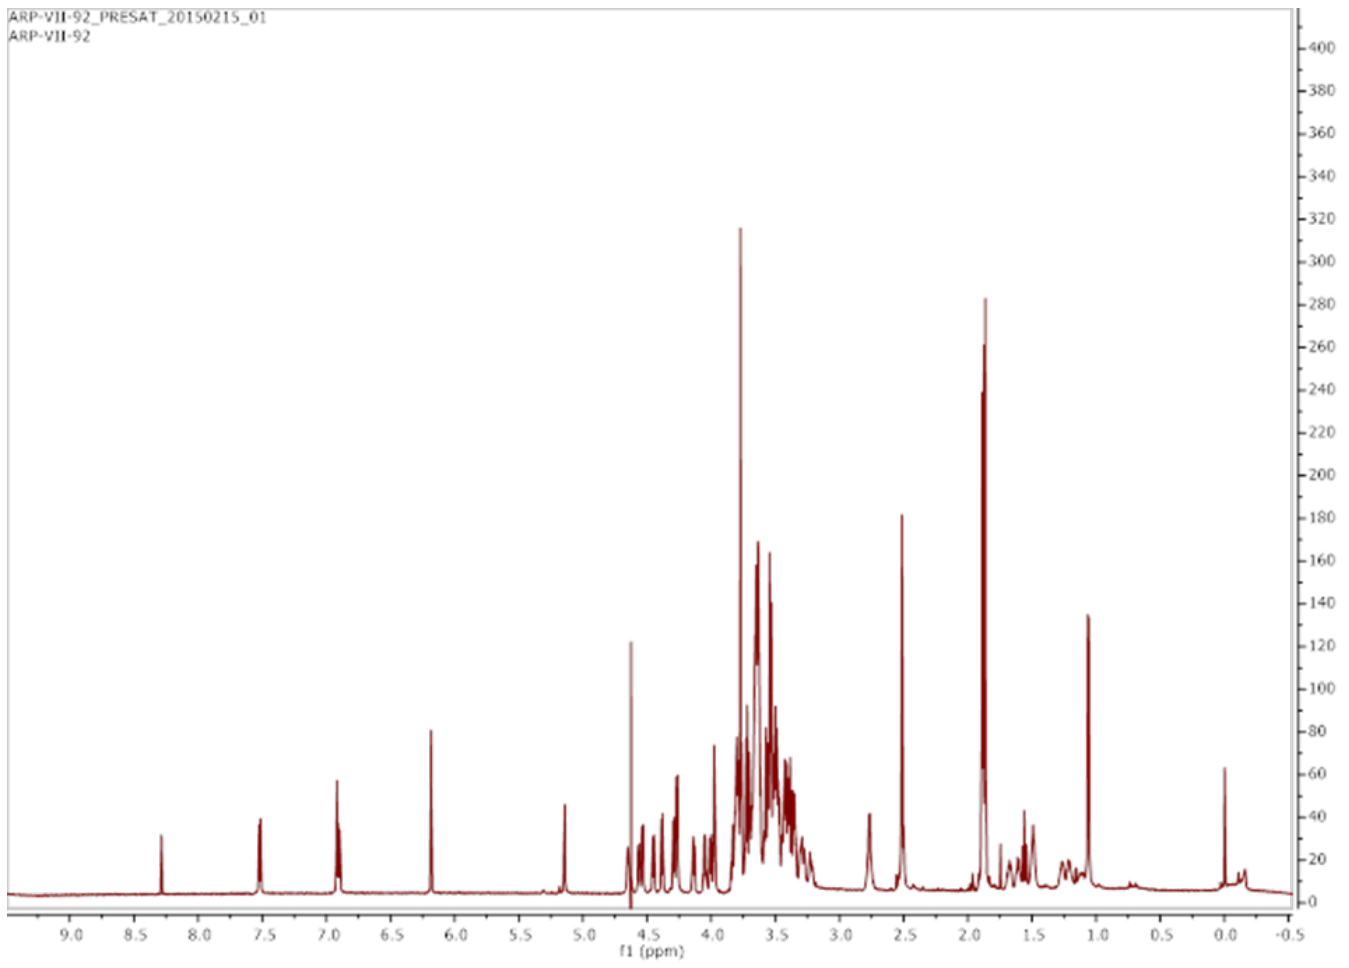

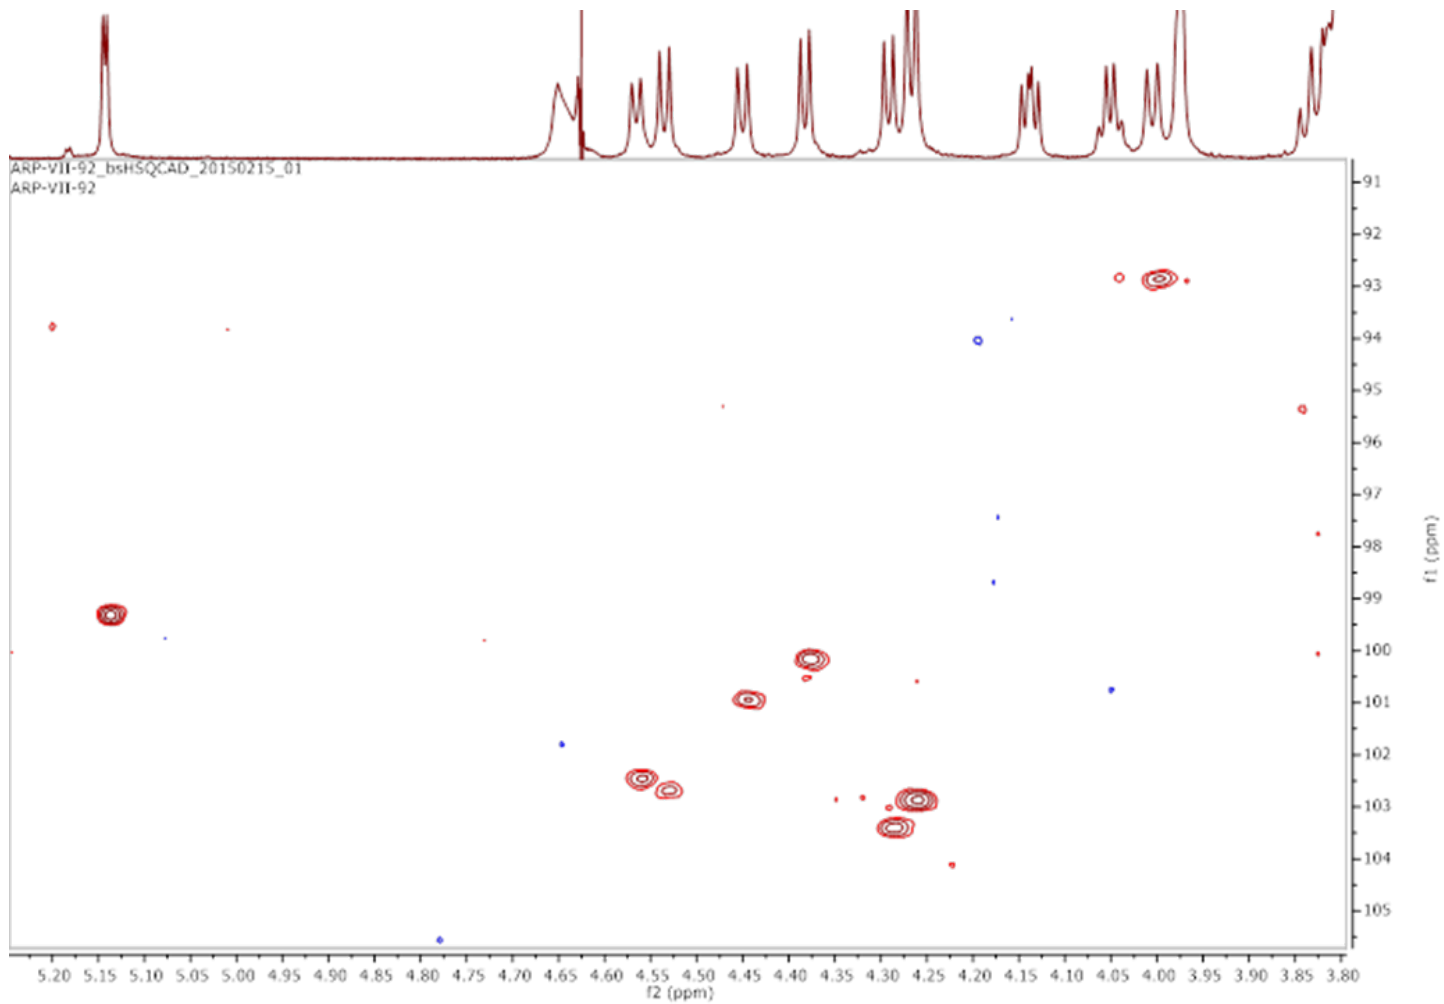



ARP-VIII-34\_PRESAT\_20150326\_01  
ARP-VIII-34

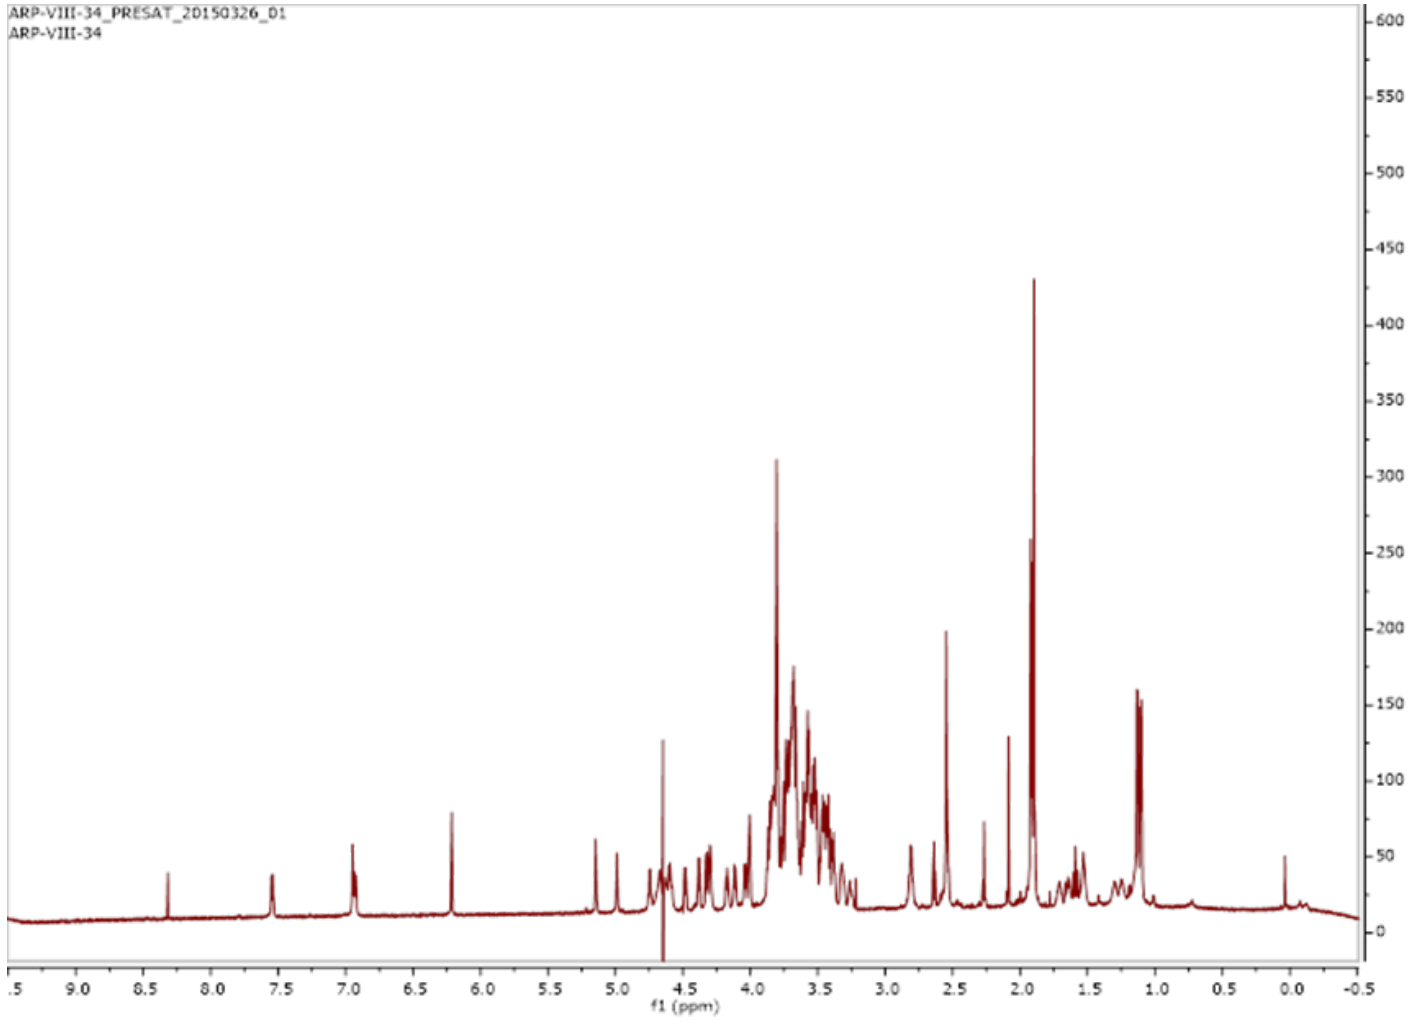

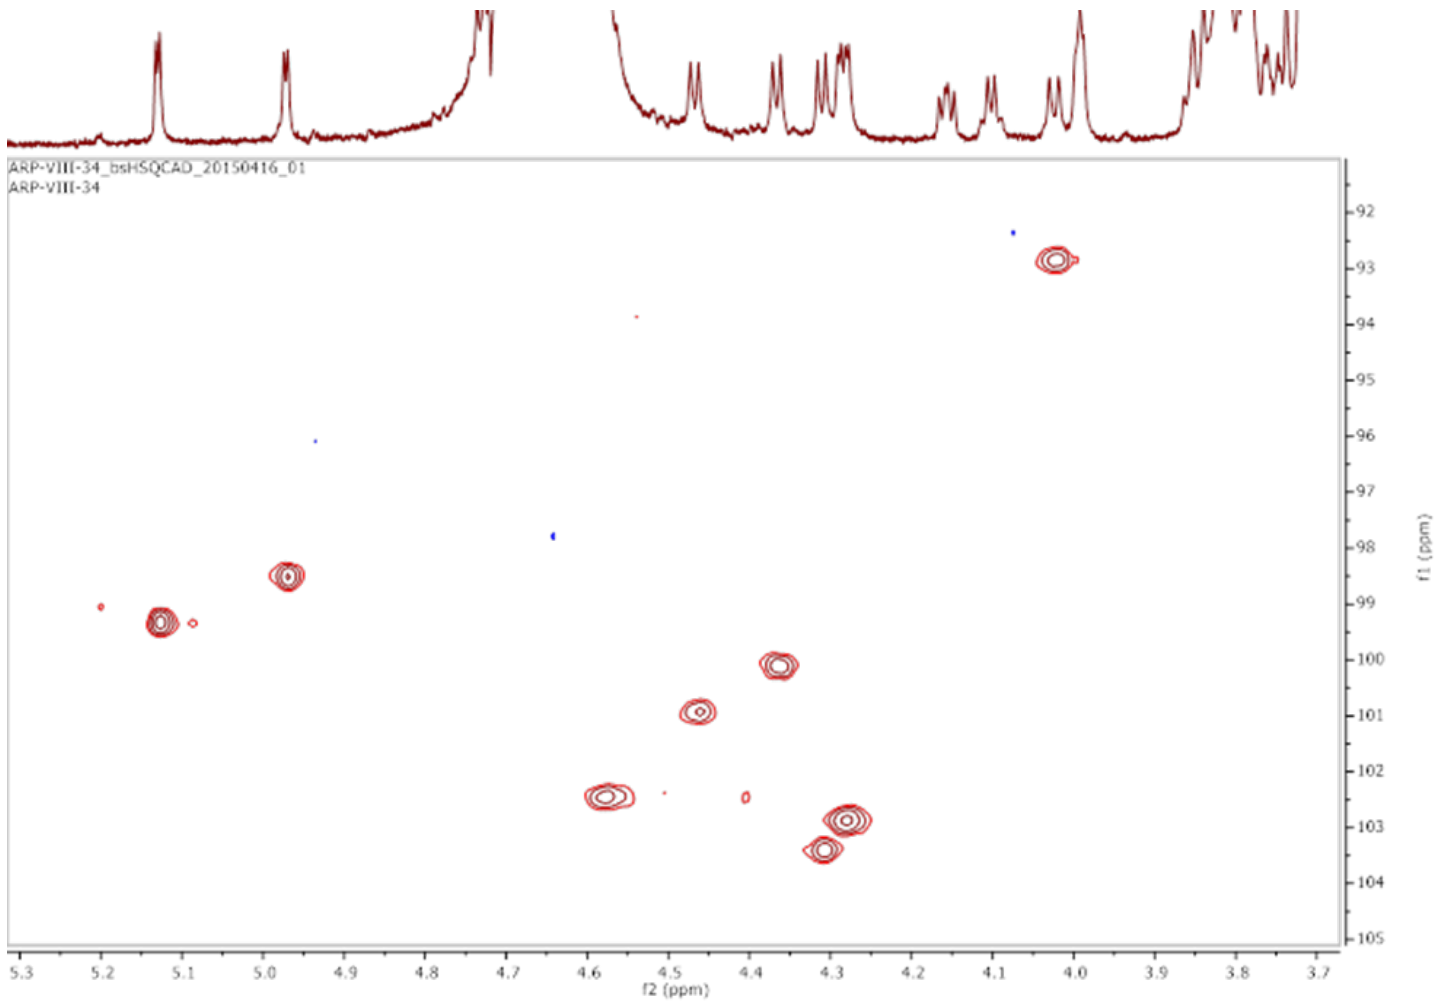

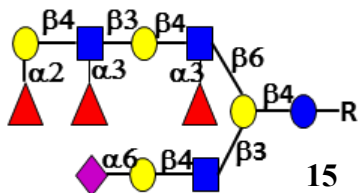

$^1\text{H}$  (800 MHz,  $\text{D}_2\text{O}$ ):  $\delta$  (ppm)

|                           | H1                             | H2   | H3                                                   | H4                            | H5                            | H6   | H7               | H8  | H9  | $\text{CH}_3$                 | NHAc                    |
|---------------------------|--------------------------------|------|------------------------------------------------------|-------------------------------|-------------------------------|------|------------------|-----|-----|-------------------------------|-------------------------|
| Glc                       | 4.00<br>(d, $J = 9.3$ Hz, 1H)  | 3.31 | 3.46                                                 | 3.38                          | n/a <sup>[a]</sup>            | n/a  | - <sup>[b]</sup> | -   | -   | - <sup>[b]</sup>              | -                       |
| Gal                       | 4.26                           | 3.40 | 3.52                                                 | 3.96<br>(d, $J = 1.6$ Hz, 1H) | n/a                           | n/a  | -                | -   | -   | -                             | -                       |
| GlcNAc                    | 4.56                           | 3.61 | 3.49                                                 | 3.42                          | n/a                           | n/a  | -                | -   | -   | -                             | 1.91 - 1.84<br>(m, 12H) |
| Gal(2)                    | 4.28<br>(d, $J = 7.8$ Hz, 1H)  | 3.36 | 3.49                                                 | 3.75                          | n/a                           | n/a  | -                | -   | -   | -                             | -                       |
| GlcNAc(2)                 | 4.44<br>(d, $J = 10.3$ Hz, 1H) | 3.70 | 3.70                                                 | 3.40                          | n/a                           | n/a  | -                | -   | -   | -                             | 1.91 - 1.84<br>(m, 12H) |
| Gal(3)                    | 4.24                           | 3.32 | 3.49                                                 | 3.90<br>(d, $J = 3.1$ Hz, 1H) | n/a                           | n/a  | -                | -   | -   | -                             | -                       |
| GlcNAc(3)                 | 4.54                           | 3.76 | 3.64                                                 | 3.27                          | n/a                           | n/a  | -                | -   | -   | -                             | 1.91 - 1.84<br>(m, 12H) |
| Gal(4)                    | 4.33<br>(d, $J = 8.0$ Hz, 1H)  | 3.46 | n/a                                                  | n/a                           | n/a                           | n/a  | -                | -   | -   | -                             | -                       |
| Fuc (1)<br>( $\alpha 3$ ) | 4.90<br>(d, $J = 4.0$ Hz, 1H)  | 3.49 | 3.69                                                 | 3.704                         | 4.70<br>(q, $J = 7.2$ Hz, 1H) | -    | -                | -   | -   | 1.05<br>(d, $J = 6.5$ Hz, 3H) | -                       |
| Fuc (2)<br>( $\alpha 3$ ) | 4.94<br>(d, $J = 3.5$ Hz, 1H)  | 3.56 | 3.73                                                 | 3.62                          | n/a                           | -    | -                | -   | -   | 1.08<br>(d, $J = 6.5$ Hz, 3H) | -                       |
| Fuc (3)<br>( $\alpha 2$ ) | 5.09<br>(d, $J = 3.6$ Hz, 1H)  | 3.61 | n/a                                                  | n/a                           | 4.62                          | -    | -                | -   | -   | 0.96<br>(d, $J = 6.4$ Hz, 3H) | -                       |
| Neu5Ac                    | -                              | -    | 1.54 – axial<br>(dd, $J = 12.1$ Hz, 1H)<br>2.48 – eq | 3.46                          | 3.62                          | 3.51 | n/a              | n/a | n/a | -                             | 1.91 - 1.84<br>(m, 12H) |

$^{13}\text{C}$  from BSHSQC (200 MHz,  $\text{D}_2\text{O}$ ):  $\delta$  (ppm)

|                        | C1     |
|------------------------|--------|
| Glc                    | 98.80  |
| Gal                    | 103.01 |
| GlcNAc                 | 102.41 |
| Gal(2)                 | 103.37 |
| GlcNAc(2)              | 100.79 |
| Gal(3)                 | 101.74 |
| GlcNAc(3)              | 102.34 |
| Gal(4)                 | 100.12 |
| Fuc (1) ( $\alpha 3$ ) | 98.66  |
| Fuc (2) ( $\alpha 3$ ) | 98.56  |
| Fuc (3) ( $\alpha 2$ ) | 99.34  |

<sup>[a]</sup> Not assigned

<sup>[b]</sup> Not applicable

MALDI TOF-MS  $m/z$  calcd  $\text{C}_{104}\text{H}_{165}\text{N}_8\text{O}_{66}\text{Na}_2$  ( $\text{M} + 2\text{Na}$ )<sup>+</sup> exact 2627.9602, found 2627.8804.



ARP-VII-93\_PRESAT\_20150301\_01  
ARP-VII-93

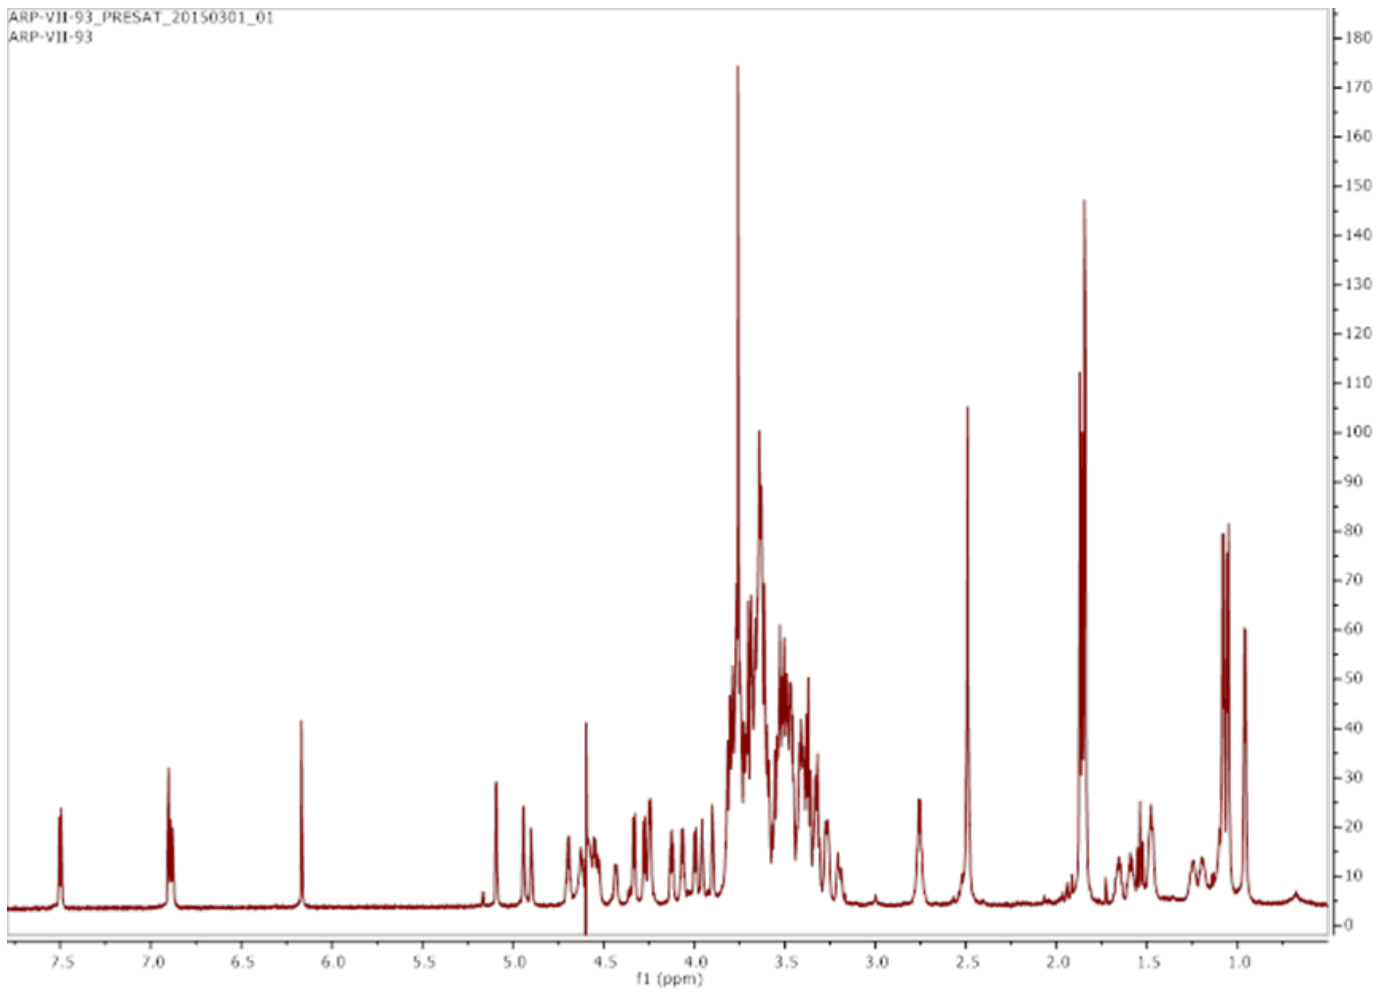

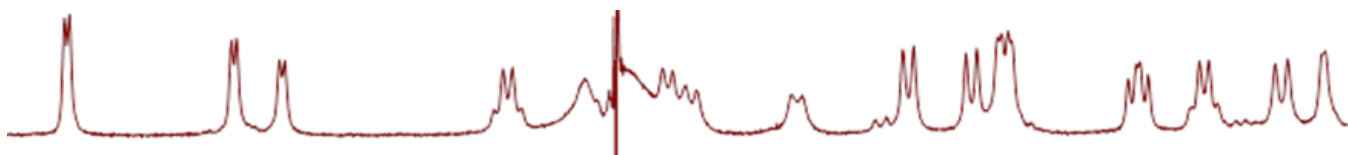

ARP-VII-93\_bsHSQCAD\_20150301\_01  
ARP-VII-93

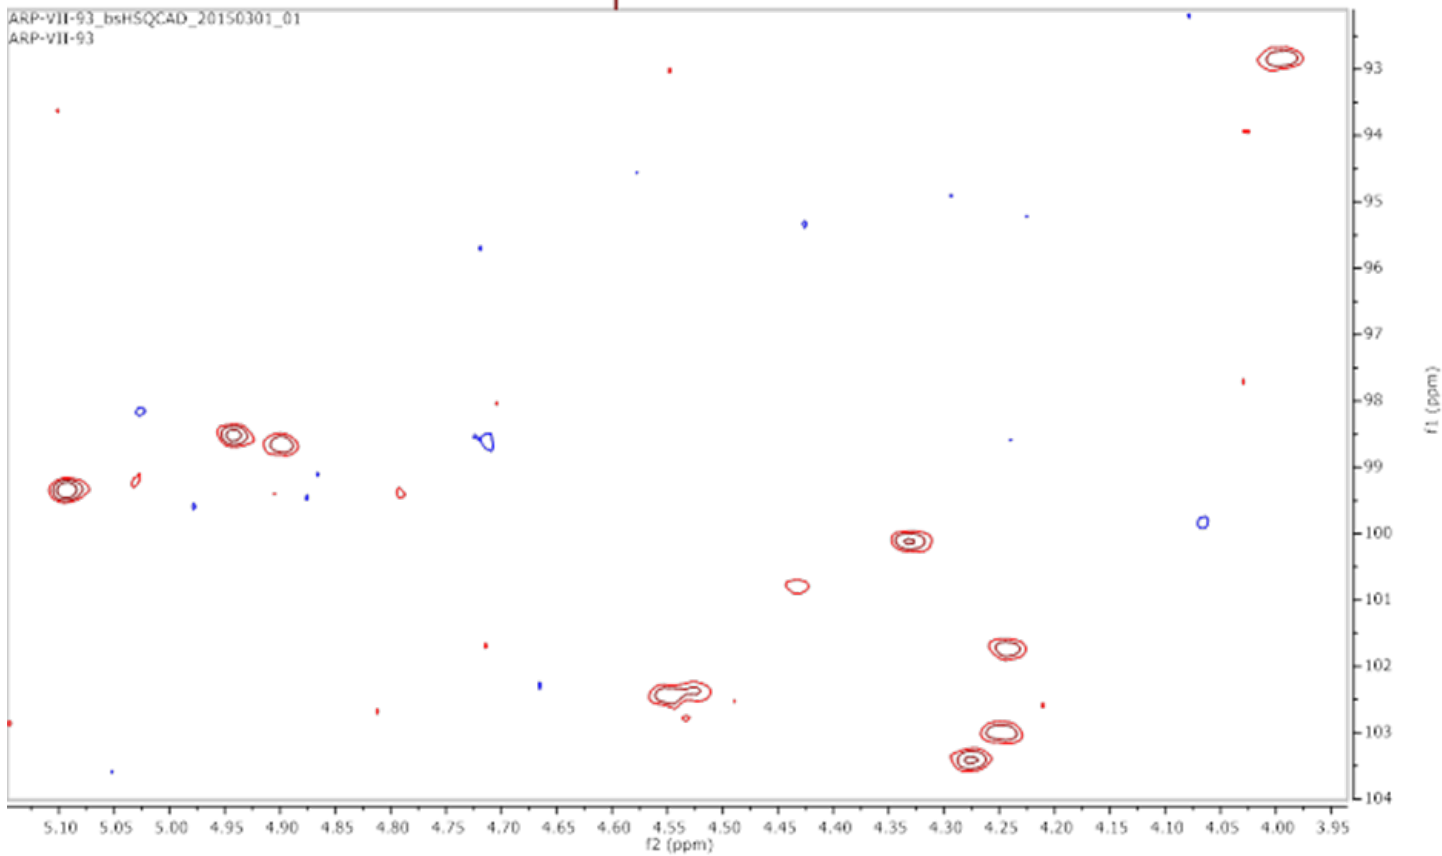

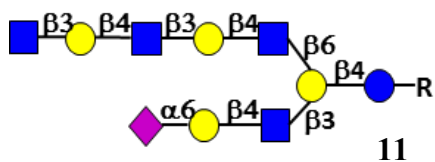

$^1\text{H}$  (800 MHz,  $\text{D}_2\text{O}$ ):  $\delta$  (ppm)

|                  | H1                            | H2    | H3                                                   | H4                            | H5                 | H6           | H7               | H8  | H9  | NHAc                    |
|------------------|-------------------------------|-------|------------------------------------------------------|-------------------------------|--------------------|--------------|------------------|-----|-----|-------------------------|
| <b>Glc</b>       | 4.00<br>(d, $J = 9.3$ Hz, 1H) | 3.36  | 3.48                                                 | 3.38                          | n/a <sup>[a]</sup> | n/a          | - <sup>[b]</sup> | -   | -   | -                       |
| <b>Gal</b>       | 4.26<br>(d, $J = 7.9$ Hz, 2H) | 3.41  | 3.55                                                 | 3.98<br>(d, $J = 1.6$ Hz, 1H) | n/a                | 3.38<br>3.69 | -                | -   | -   | -                       |
| <b>GlcNAc</b>    | 4.56<br>(d, $J = 7.8$ Hz, 1H) | 3.63  | 3.50                                                 | 3.45                          | n/a                | n/a          | -                | -   | -   | 1.91 - 1.84<br>(m, 15H) |
| <b>Gal(2)</b>    | 4.29<br>(d, $J = 7.5$ Hz, 1H) | 3.341 | 3.56                                                 | 3.99                          | n/a                | n/a          | -                | -   | -   | -                       |
| <b>GlcNAc(2)</b> | 4.44<br>(d, $J = 8.2$ Hz, 1H) | 3.56  | 3.52                                                 | 3.42                          | n/a                | n/a          | -                | -   | -   | 1.91 - 1.84<br>(m, 15H) |
| <b>Gal(3)</b>    | 4.26<br>(d, $J = 7.9$ Hz, 2H) | 3.41  | 3.55                                                 | 3.98                          | n/a                | n/a          | -                | -   | -   | -                       |
| <b>GlcNAc(3)</b> | 4.53<br>(d, $J = 8.5$ Hz, 1H) | 3.62  | 3.56                                                 | n/a                           | n/a                | n/a          | -                | -   | -   | 1.91 - 1.84<br>(m, 15H) |
| <b>Gal(4)</b>    | 4.28<br>d, $J = 7.5$ Hz, 1H)  | 3.38  | 3.51                                                 | 3.77                          | n/a                | n/a          | -                | -   | -   | -                       |
| <b>GlcNAc(4)</b> | 4.52<br>(d, $J = 8.5$ Hz, 1H) | 3.58  | 3.40                                                 | 3.29                          | n/a                | n/a          | -                | -   | -   | 1.91 - 1.84<br>(m, 15H) |
| <b>Neu5Ac</b>    | -                             | -     | 1.54 – axial<br>(dd, $J = 12.1$ Hz, 1H)<br>2.50 – eq | 3.48                          | 3.62               | 3.51         | n/a              | n/a | n/a | 1.91 - 1.84<br>(m, 15H) |

$^{13}\text{C}$  from BSHSQC (200 MHz,  $\text{D}_2\text{O}$ ):  $\delta$  (ppm)

|                  | C1      |
|------------------|---------|
| <b>Glc</b>       | 92.86   |
| <b>Gal</b>       | 102.90  |
| <b>GlcNAc</b>    | 102.445 |
| <b>Gal(2)</b>    | 102.77  |
| <b>GlcNAc(2)</b> | 100.92  |
| <b>Gal(3)</b>    | 102.90  |
| <b>GlcNAc(3)</b> | 102.64  |
| <b>Gal(4)</b>    | 103.38  |
| <b>GlcNAc(4)</b> | 102.77  |

<sup>[a]</sup> Not assigned

<sup>[b]</sup> Not applicable

MALDI TOF-MS  $m/z$  calcd  $\text{C}_{94}\text{H}_{148}\text{N}_9\text{O}_{59}\text{Na}_2^-$  ( $M + 2\text{Na}$ )<sup>+</sup> exact 2392.8658, found 2392.3691.

ARP-VII-91\_PRESAT\_20150213\_02  
ARP-VII-91

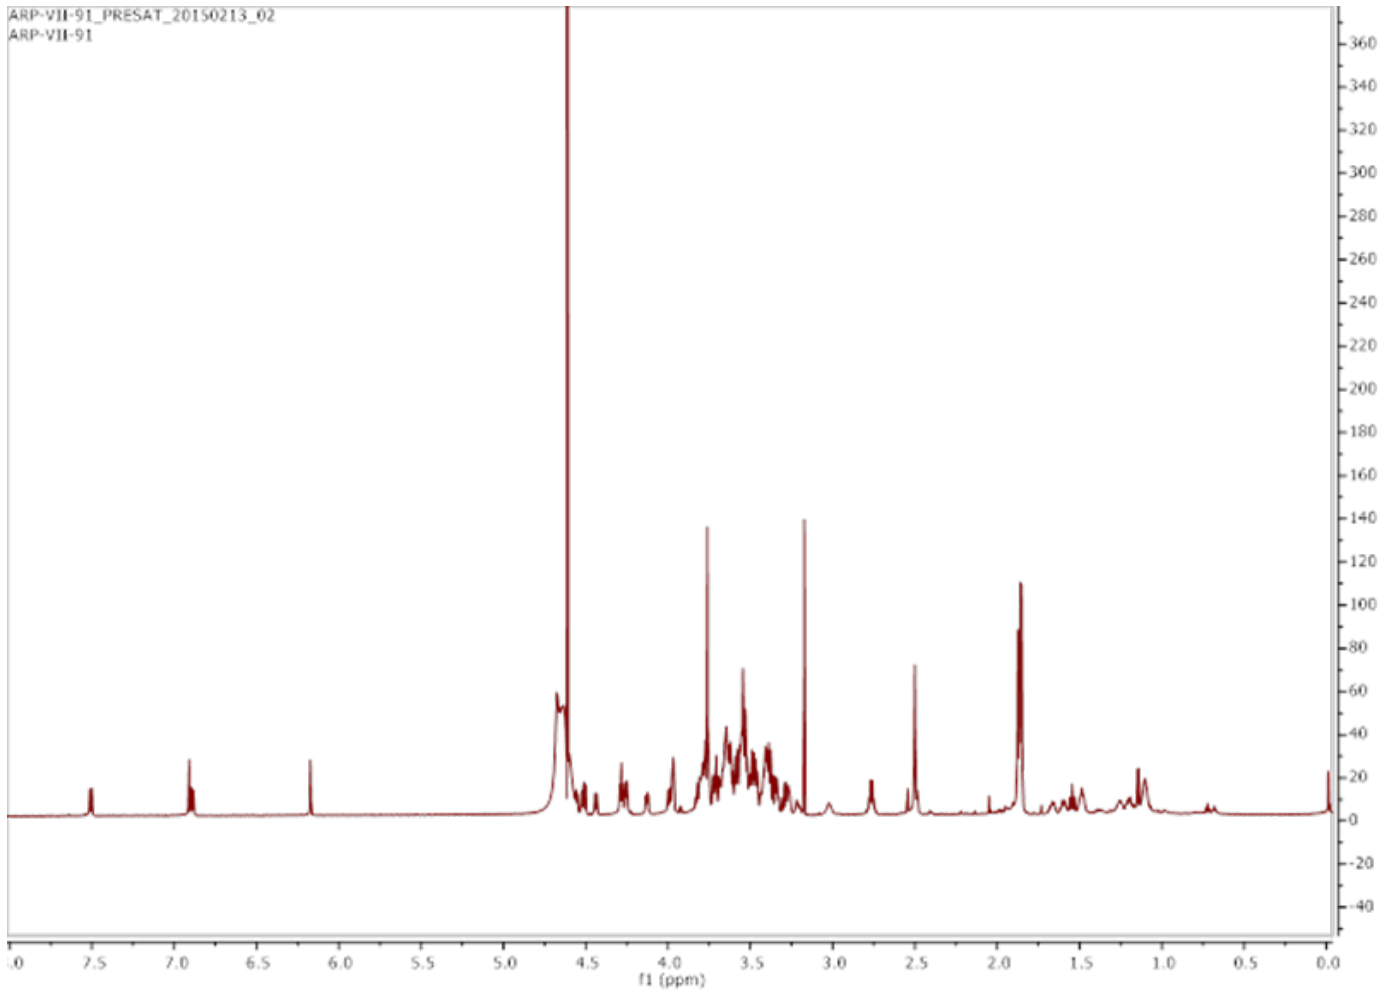

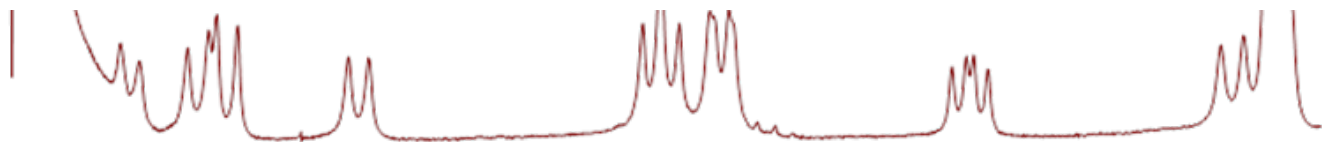

ARP-VII-91\_bshSQCAD\_20150215\_01  
ARP-VII-91

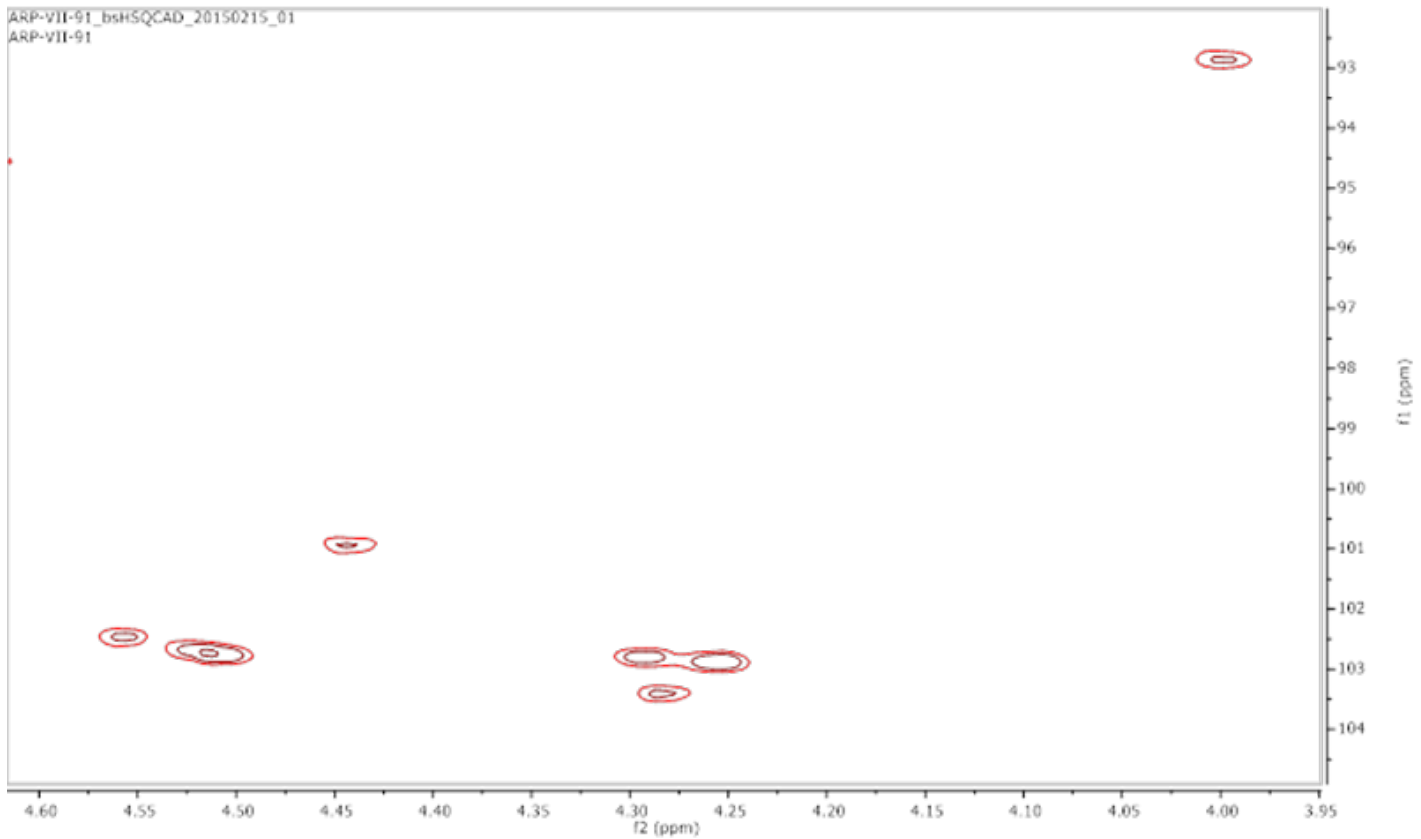

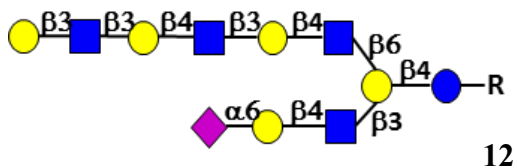

$^1\text{H}$  (800 MHz,  $\text{D}_2\text{O}$ ):  $\delta$  (ppm)

|                  | H1                            | H2   | H3                                                   | H4   | H5                 | H6           | H7               | H8  | H9  | NHAc                    |
|------------------|-------------------------------|------|------------------------------------------------------|------|--------------------|--------------|------------------|-----|-----|-------------------------|
| <b>Glc</b>       | 4.00                          | 3.34 | 3.48                                                 | 3.40 | n/a <sup>[a]</sup> | n/a          | - <sup>[b]</sup> | -   | -   | -                       |
| <b>Gal</b>       | 4.25<br>(d, $J = 8.8$ Hz, 2H) | 3.40 | 3.54                                                 | 3.97 | n/a                | 3.38<br>3.69 | -                | -   | -   | -                       |
| <b>GlcNAc</b>    | 4.55<br>(d, $J = 8.3$ Hz, 1H) | 3.64 | 3.49                                                 | 3.44 | n/a                | n/a          | -                | -   | -   | 1.91 - 1.84<br>(m, 15H) |
| <b>Gal(2)</b>    | 4.30                          | 3.30 | 3.48                                                 | 3.75 | n/a                | n/a          | -                | -   | -   | -                       |
| <b>GlcNAc(2)</b> | 4.45<br>(d, $J = 8.5$ Hz, 1H) | 3.56 | 3.51                                                 | 3.41 | n/a                | n/a          | -                | -   | -   | 1.91 - 1.84<br>(m, 15H) |
| <b>Gal(3)</b>    | 4.25<br>(d, $J = 8.8$ Hz, 2H) | 3.40 | 3.54                                                 | 3.97 | n/a                | n/a          | -                | -   | -   | -                       |
| <b>GlcNAc(3)</b> | 4.52<br>(d, $J = 8.1$ Hz, 1H) | 3.63 | 3.55                                                 | 3.41 | n/a                | n/a          | -                | -   | -   | 1.91 - 1.84<br>(m, 15H) |
| <b>Gal(4)</b>    | 4.29                          | 3.41 | 3.57                                                 | 3.99 | n/a                | n/a          | -                | -   | -   | -                       |
| <b>GlcNAc(4)</b> | 4.53                          | 3.72 | 3.40                                                 | 3.31 | n/a                | n/a          | -                | -   | -   | 1.91 - 1.84<br>(m, 15H) |
| <b>Gal(5)</b>    | 4.30                          | 3.41 | 3.57                                                 | 3.99 | n/a                | n/a          | -                | -   | -   | -                       |
| <b>Neu5Ac</b>    | -                             | -    | 1.54 – axial<br>(dd, $J = 12.1$ Hz, 1H)<br>2.50 – eq | 3.48 | 3.62               | 3.51         | n/a              | n/a | n/a | 1.91 - 1.84<br>(m, 15H) |

$^{13}\text{C}$  from BSHSQC (200 MHz,  $\text{D}_2\text{O}$ ):  $\delta$  (ppm)

|                   | C1     |
|-------------------|--------|
| <b>Glc</b>        | 92.86  |
| <b>Gal</b>        | 102.87 |
| <b>GlcNAc</b>     | 102.49 |
| <b>Gal(2)</b>     | 102.81 |
| <b>GlcNAc(2)</b>  | 100.95 |
| <b>Gal(3)</b>     | 102.87 |
| <b>GlcNAc(3)</b>  | 102.63 |
| <b>Gal(4)</b>     | 102.81 |
| <b>GlcNAc (4)</b> | 102.49 |
| <b>Gal(5)</b>     | 103.46 |

<sup>[a]</sup> Not assigned

<sup>[b]</sup> Not applicable

MALDI TOF-MS  $m/z$  calcd  $\text{C}_{100}\text{H}_{158}\text{N}_9\text{O}_{64}\text{Na}_2^-$  ( $M + 2\text{Na}$ )<sup>+</sup> exact 2554.9186, found 2554.7422.

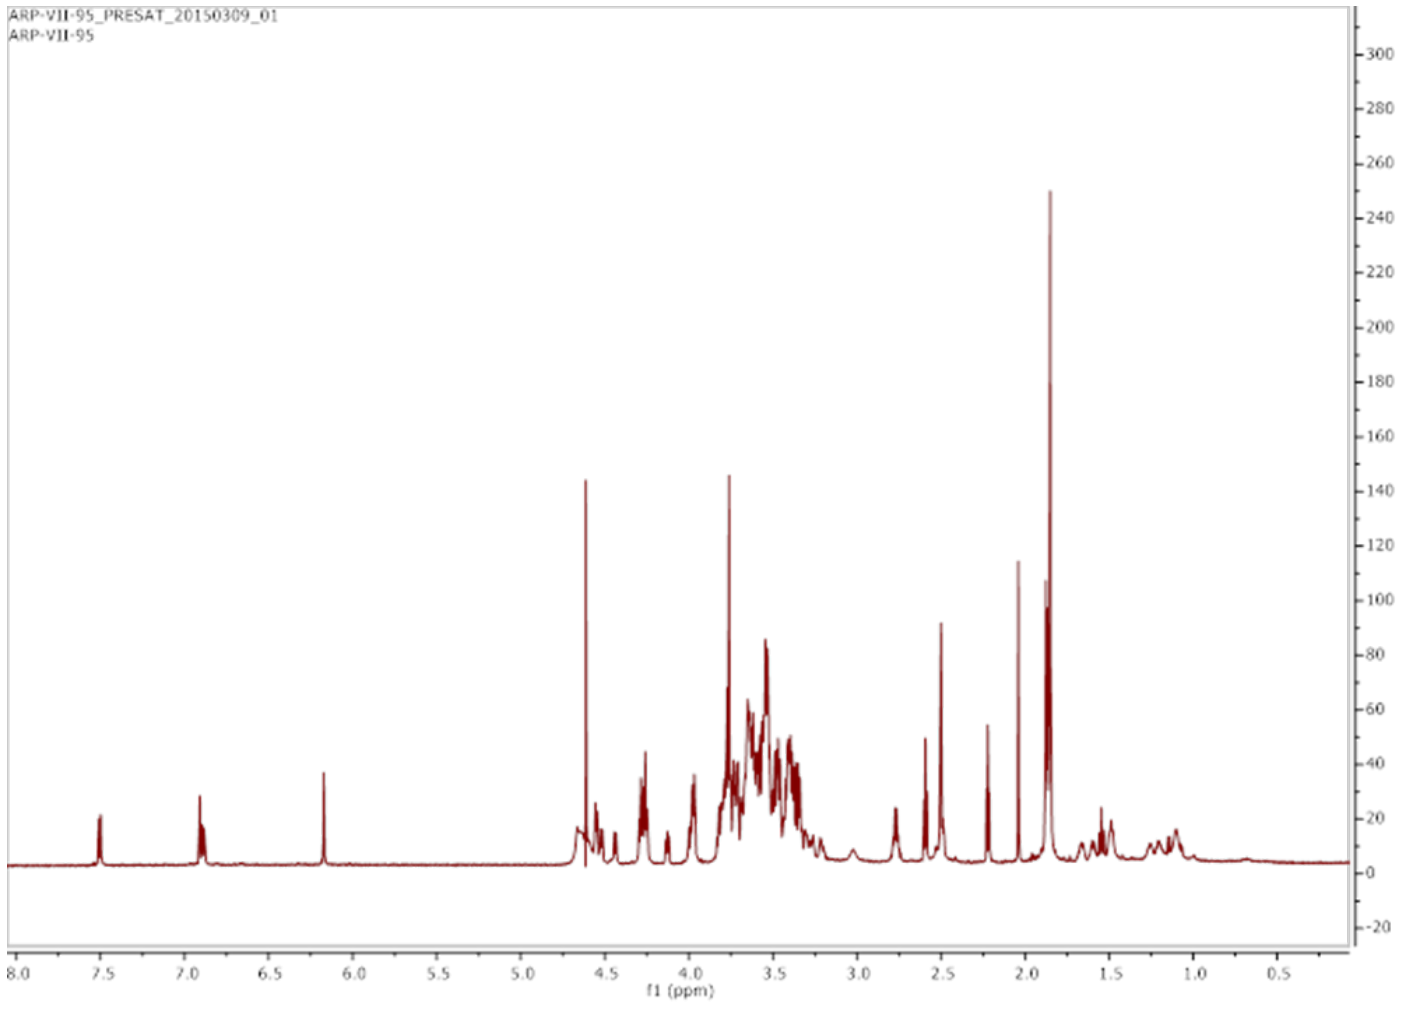

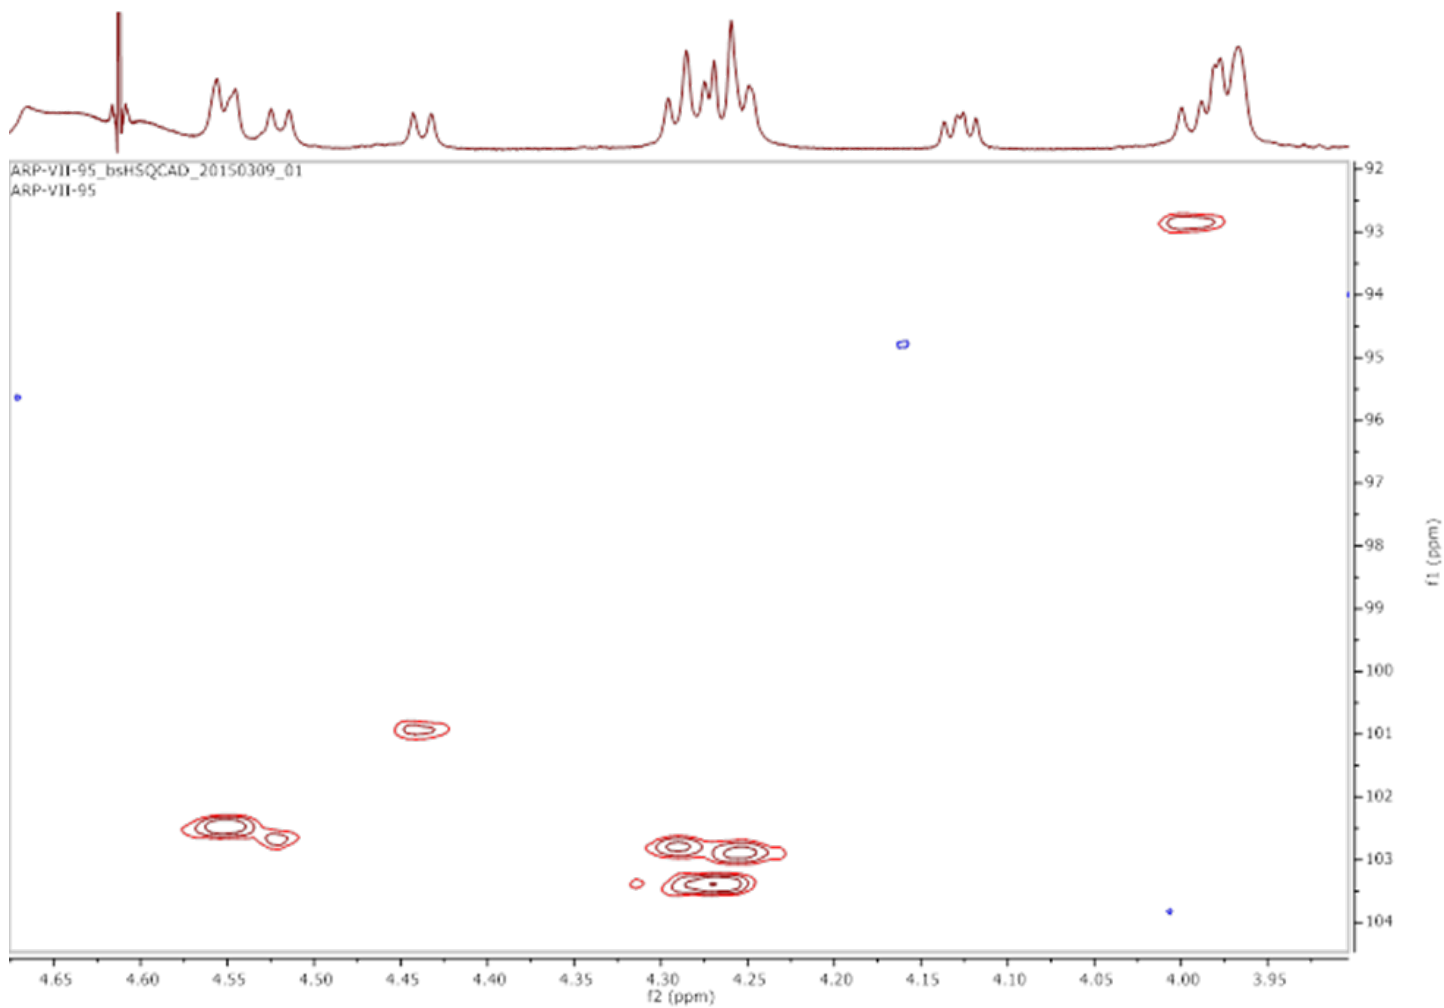



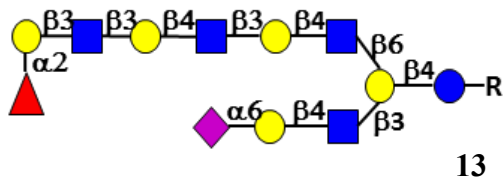

$^1\text{H}$  (800 MHz,  $\text{D}_2\text{O}$ ):  $\delta$  (ppm)

|                   | H1                            | H2   | H3                                                      | H4   | H5                            | H6   | H7               | H8  | H9  | $\text{CH}_3$                 | NHAc                    |
|-------------------|-------------------------------|------|---------------------------------------------------------|------|-------------------------------|------|------------------|-----|-----|-------------------------------|-------------------------|
| Glc               | 4.00<br>(d, $J = 9.2$ Hz, 1H) | 3.35 | 3.40                                                    | 3.47 | n/a <sup>[a]</sup>            | n/a  | - <sup>[b]</sup> | -   | -   | -                             | -                       |
| Gal               | 4.26                          | 3.41 | 3.55                                                    | 3.97 | n/a                           | n/a  | -                | -   | -   | -                             | -                       |
| GlcNAc            | 4.56<br>(d, $J = 7.9$ Hz, 2H) | 3.63 | 3.49                                                    | 3.43 | n/a                           | n/a  | -                | -   | -   | -                             | 1.91 - 1.84<br>(m, 15H) |
| Gal(2)            | 4.29                          | 3.38 | 3.50                                                    | 3.76 | n/a                           | n/a  | -                | -   | -   | -                             | -                       |
| GlcNAc(2)         | 4.44                          | 3.57 | 3.51                                                    | 3.41 | n/a                           | n/a  | -                | -   | -   | -                             | 1.91 - 1.84<br>(m, 15H) |
| Gal(3)            | 4.26                          | 3.41 | 3.55                                                    | 3.97 | n/a                           | n/a  | -                | -   | -   | -                             | -                       |
| GlcNAc(3)         | 4.52<br>(d, $J = 8.4$ Hz, 1H) | 3.63 | 3.55                                                    | 3.41 | n/a                           | n/a  | -                | -   | -   | -                             | 1.91 - 1.84<br>(m, 15H) |
| Gal(4)            | 4.45                          | 3.65 | n/a                                                     | 3.82 | n/a                           | n/a  | -                | -   | -   | -                             | -                       |
| GlcNAc(4)         | 4.56<br>(d, $J = 7.9$ Hz, 2H) | 3.63 | 3.49                                                    | 3.43 | n/a                           | n/a  | -                | -   | -   | -                             | 1.91-1.84<br>(m, 15H)   |
| Gal(5)            | 4.48<br>(d, $J = 7.7$ Hz, 1H) | 3.42 | 3.66                                                    | 3.72 | n/a                           | n/a  | -                | -   | -   | -                             | -                       |
| Fuc( $\alpha 2$ ) | 5.02<br>(d, $J = 4.0$ Hz, 1H) | 3.54 | n/a                                                     | n/a  | 4.12<br>(q, $J = 6.4$ Hz, 1H) | -    | -                | -   | -   | 1.07<br>(d, $J = 6.6$ Hz, 3H) | -                       |
| Neu5Ac            | -                             | -    | 1.54 – axial<br>(dd, $J = 12.1$ Hz,<br>1H)<br>2.50 – eq | 3.48 | 3.62                          | 3.51 | n/a              | n/a | n/a | -                             | 1.91 - 1.84<br>(m, 15H) |

$^{13}\text{C}$  from BSHSQC (200 MHz,  $\text{D}_2\text{O}$ ):  $\delta$  (ppm)

|                   | C1     |
|-------------------|--------|
| Glc               | 92.87  |
| Gal               | 102.82 |
| GlcNAc            | 102.43 |
| Gal(2)            | 103.41 |
| GlcNAc(2)         | 100.93 |
| Gal(3)            | 102.82 |
| GlcNAc(3)         | 102.69 |
| Gal(4)            | 103.24 |
| GlcNAc (4)        | 102.43 |
| Gal(5)            | 100.20 |
| Fuc( $\alpha 2$ ) | 99.42  |

<sup>[a]</sup> Not assigned

<sup>[b]</sup> Not applicable

MALDI TOF-MS  $m/z$  calcd  $\text{C}_{106}\text{H}_{168}\text{N}_9\text{O}_{68}\text{Na}_2^-$  ( $M + 2\text{Na}$ )<sup>+</sup> exact 2700.9766, found 2700.6624.

ARP-VIII-4\_PRESAT\_20150301\_01  
ARP-VIII-4

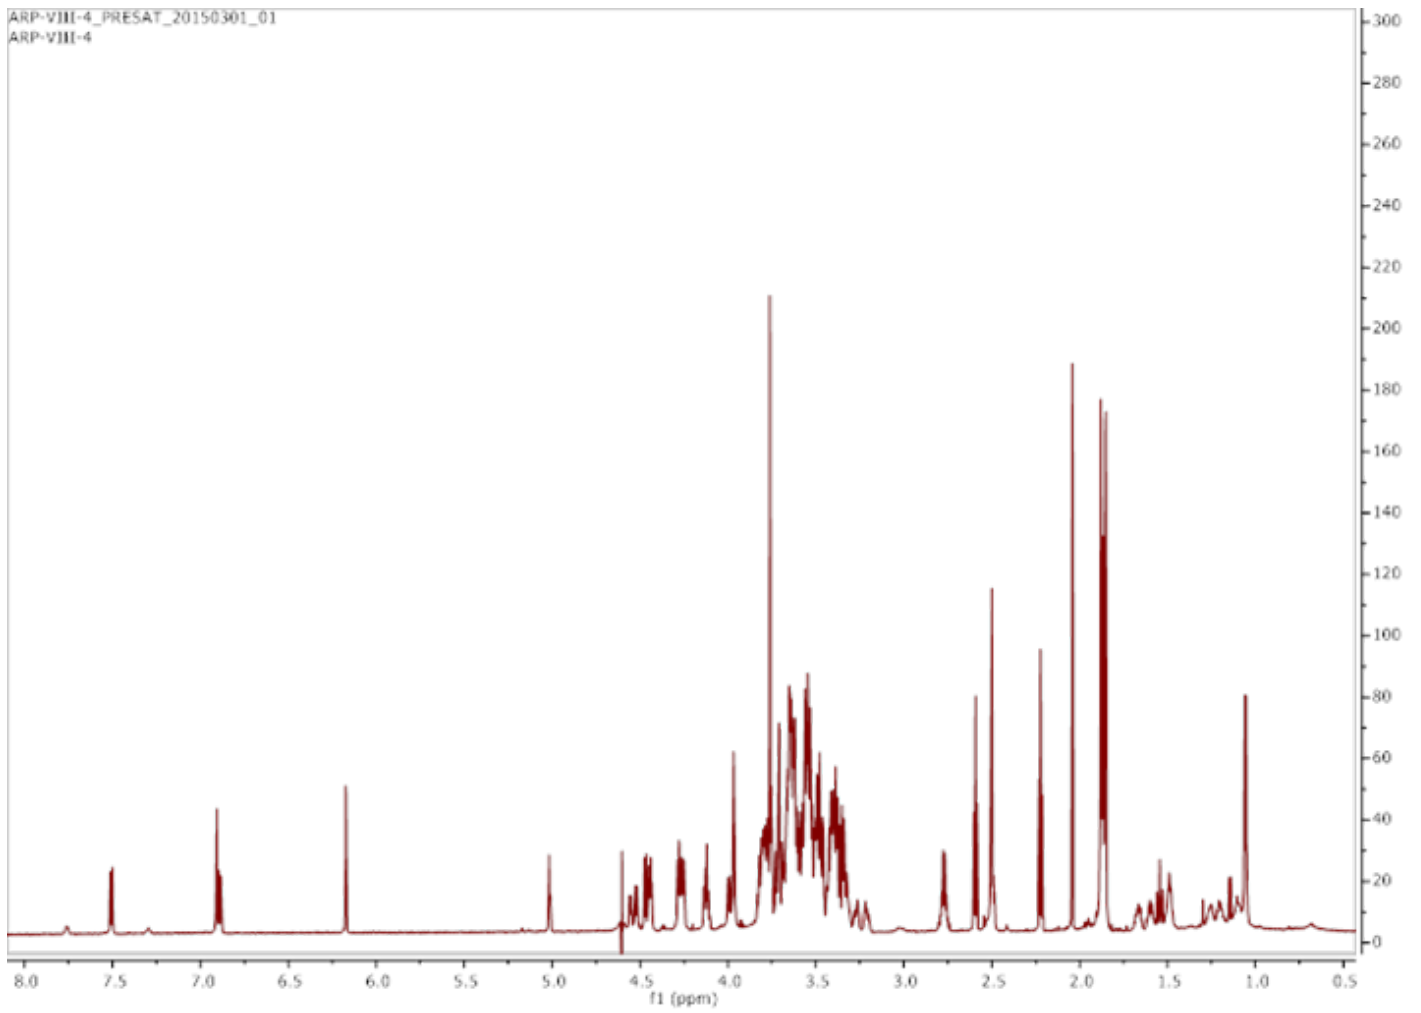

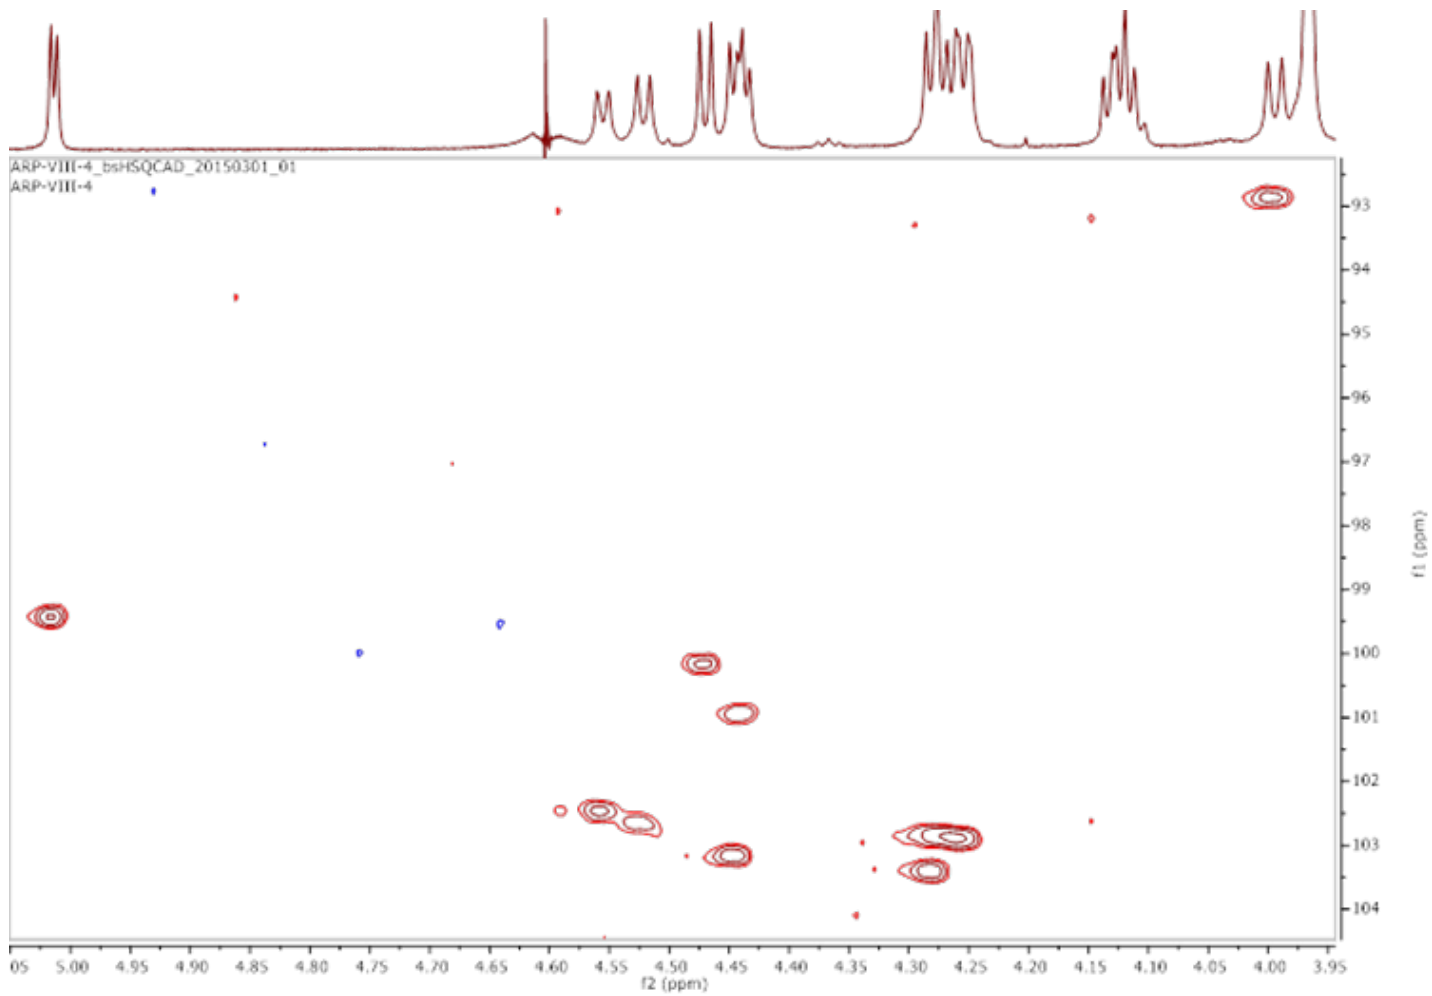

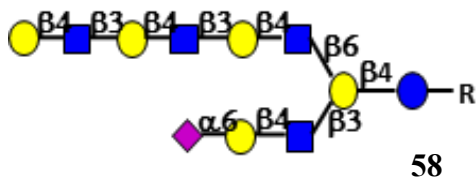

$^1\text{H}$  (800 MHz,  $\text{D}_2\text{O}$ ):  $\delta$  (ppm)

|           | H1                            | H2   | H3                                                   | H4   | H5                 | H6           | H7               | H8  | H9  | NHAc                    |
|-----------|-------------------------------|------|------------------------------------------------------|------|--------------------|--------------|------------------|-----|-----|-------------------------|
| Glc       | 4.00                          | 3.35 | 3.48                                                 | 3.39 | n/a <sup>[a]</sup> | n/a          | - <sup>[b]</sup> | -   | -   | -                       |
| Gal       | 4.26<br>(d, $J = 8.8$ Hz, 2H) | 3.42 | 3.54                                                 | 3.98 | n/a                | 3.38<br>3.69 | -                | -   | -   | -                       |
| GlcNAc    | 4.56<br>(d, $J = 8.3$ Hz, 1H) | 3.63 | 3.49                                                 | 3.44 | n/a                | n/a          | -                | -   | -   | 1.91 - 1.84<br>(m, 15H) |
| Gal(2)    | 4.30                          | 3.38 | 3.49                                                 | 3.76 | n/a                | n/a          | -                | -   | -   | -                       |
| GlcNAc(2) | 4.44<br>(d, $J = 8.3$ Hz, 1H) | 3.58 | 3.51                                                 | 3.41 | n/a                | n/a          | -                | -   | -   | 1.91 - 1.84<br>(m, 15H) |
| Gal(3)    | 4.26<br>(d, $J = 8.8$ Hz, 2H) | 3.42 | 3.54                                                 | 3.98 | n/a                | n/a          | -                | -   | -   | -                       |
| GlcNAc(3) | 4.53                          | 3.64 | 3.56                                                 | 3.41 | n/a                | n/a          | -                | -   | -   | 1.91 - 1.84<br>(m, 15H) |
| Gal(4)    | 4.30                          | 3.38 | 3.49                                                 | 3.76 | n/a                | n/a          | -                | -   | -   | -                       |
| GlcNAc(4) | 4.53                          | 3.64 | 3.56                                                 | 3.41 | n/a                | n/a          | -                | -   | -   | 1.91 - 1.84<br>(m, 15H) |
| Gal(5)    | 4.28                          | 3.42 | 3.56                                                 | 3.99 | n/a                | n/a          | -                | -   | -   | -                       |
| Neu5Ac    | -                             | -    | 1.54 – axial<br>(dd, $J = 12.1$ Hz, 1H)<br>2.50 – eq | 3.48 | 3.62               | 3.51         | n/a              | n/a | n/a | 1.91 - 1.84<br>(m, 15H) |

$^{13}\text{C}$  from BSHSQC (200 MHz,  $\text{D}_2\text{O}$ ):  $\delta$  (ppm)

|           | C1     |
|-----------|--------|
| Glc       | 92.86  |
| Gal       | 102.91 |
| GlcNAc    | 102.51 |
| Gal(2)    | 102.81 |
| GlcNAc(2) | 100.96 |
| Gal(3)    | 102.98 |
| GlcNAc(3) | 102.71 |
| Gal(4)    | 102.81 |
| GlcNAc(4) | 102.71 |
| Gal(5)    | 103.38 |

<sup>[a]</sup> Not assigned

<sup>[b]</sup> Not applicable

MALDI TOF-MS  $m/z$  calcd  $\text{C}_{100}\text{H}_{158}\text{N}_9\text{O}_{64}\text{Na}_2^-$  ( $M + 2\text{Na}$ )<sup>+</sup> exact 2554.9186, found 2554.2725.

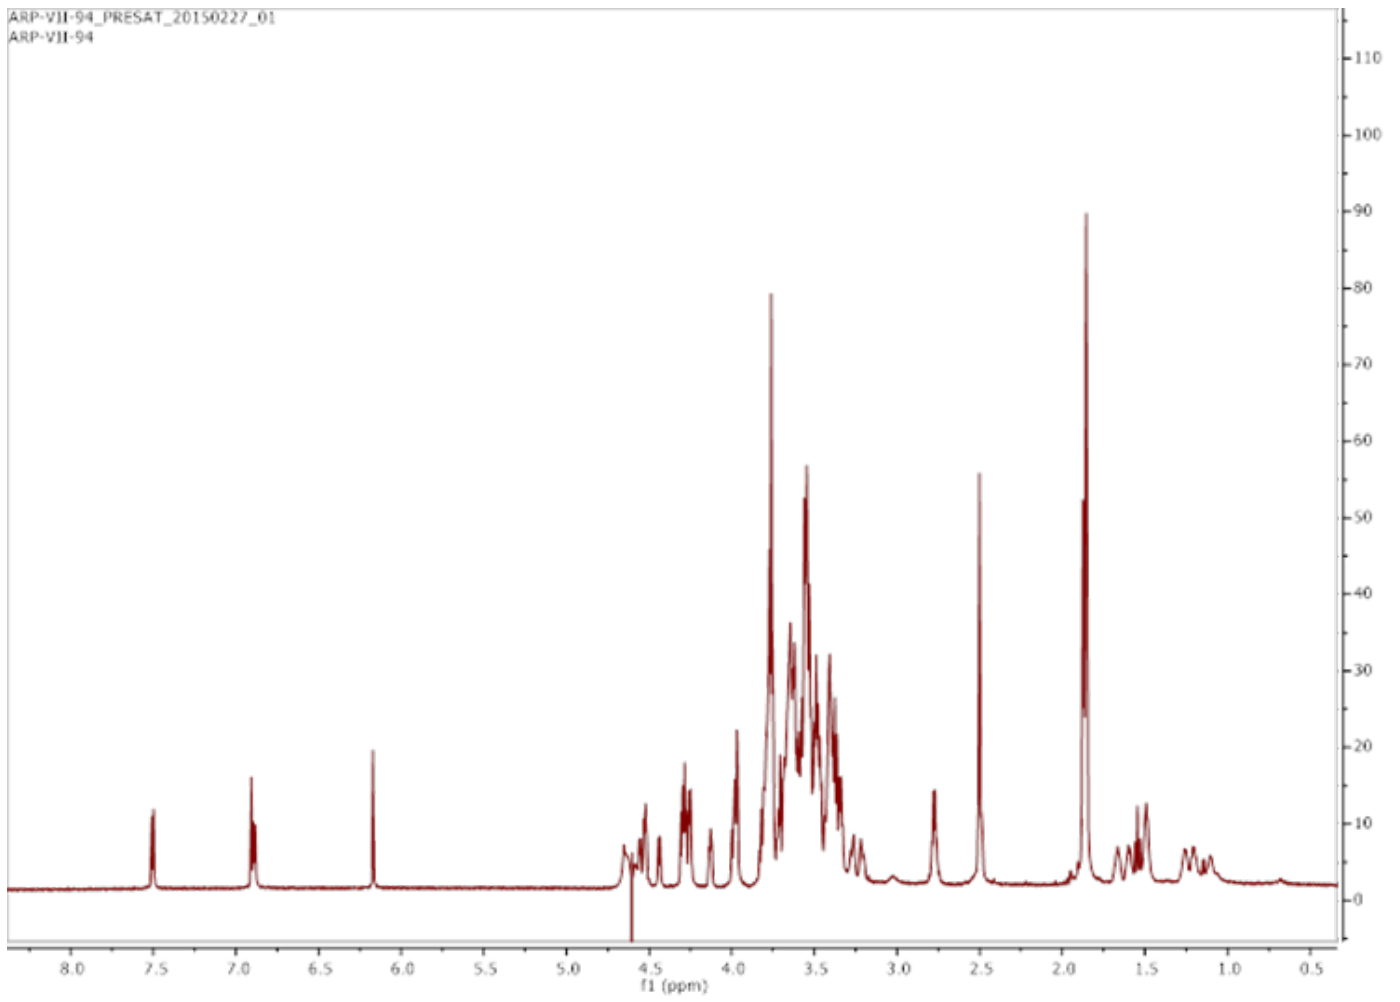

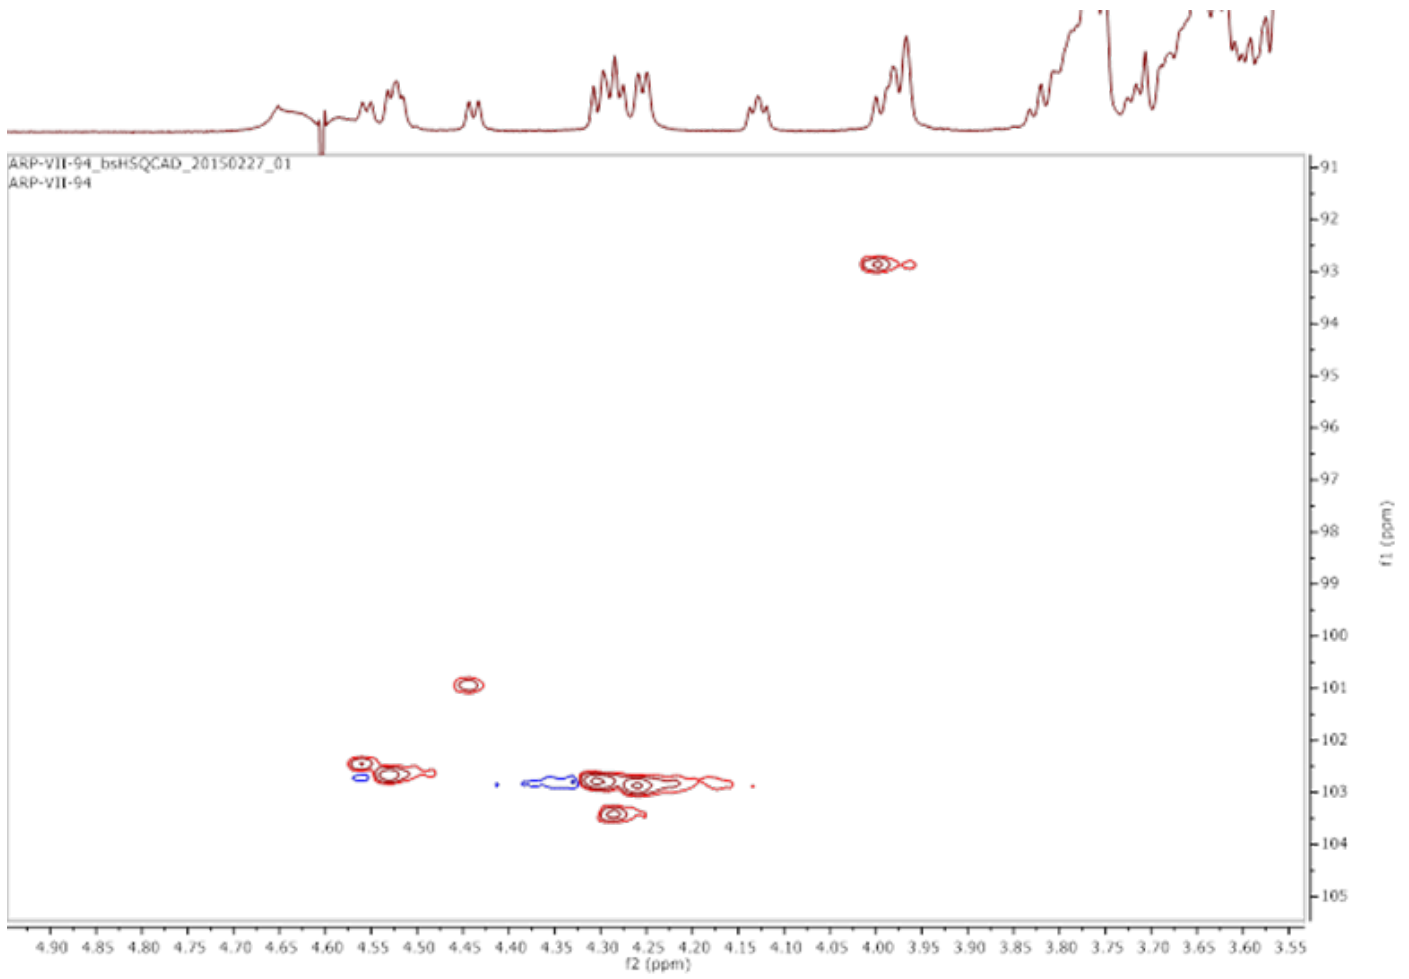

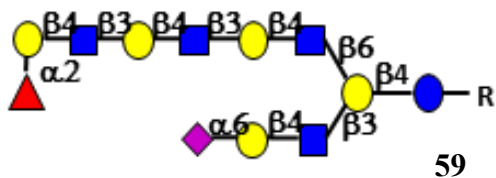

$^1\text{H}$  (600 MHz,  $\text{D}_2\text{O}$ ):  $\delta$  (ppm)

|                  | H1                            | H2   | H3                                                      | H4   | H5                            | H6           | H7               | H8  | H9  | $\text{CH}_3$                 | NHAc                    |
|------------------|-------------------------------|------|---------------------------------------------------------|------|-------------------------------|--------------|------------------|-----|-----|-------------------------------|-------------------------|
| Glc              | 4.00                          | 3.31 | 3.39                                                    | 3.46 | n/a <sup>[a]</sup>            | n/a          | - <sup>[b]</sup> | -   | -   | -                             | -                       |
| Gal              | 4.26                          | 3.39 | 3.52                                                    | 3.95 | n/a                           | 3.38<br>3.69 | -                | -   | -   | -                             | -                       |
| GlcNAc           | 4.57<br>(d, $J = 7.6$ Hz, 1H) | 3.60 | 3.47                                                    | n/a  | n/a                           | n/a          | -                | -   | -   | -                             | 1.91 - 1.84<br>(m, 15H) |
| Gal(2)           | 4.28                          | 3.34 | 3.48                                                    | 3.73 | n/a                           | n/a          | -                | -   | -   | -                             | -                       |
| GlcNAc(2)        | 4.44<br>(d, $J = 8.2$ Hz, 1H) | 3.53 | 3.48                                                    | 3.39 | n/a                           | n/a          | -                | -   | -   | -                             | 1.91 - 1.84<br>(m, 15H) |
| Gal(3)           | 4.26                          | 3.39 | 3.52                                                    | 3.95 | n/a                           | n/a          | -                | -   | -   | -                             | -                       |
| GlcNAc(3)        | 4.53<br>(d, $J = 8.2$ Hz, 1H) | 3.62 | 3.52                                                    | 3.38 | n/a                           | n/a          | -                | -   | -   | -                             | 1.91 - 1.84<br>(m, 15H) |
| Gal(4)           | 4.30                          | 3.39 | 3.57                                                    | 3.95 | n/a                           | n/a          | -                | -   | -   | -                             | -                       |
| GlcNAc(4)        | 4.53<br>(d, $J = 8.2$ Hz, 1H) | 3.62 | 3.52                                                    | 3.26 | n/a                           | n/a          | -                | -   | -   | -                             | 1.91-1.84<br>(m, 15H)   |
| Gal(5)           | 4.38<br>(d, $J = 7.7$ Hz, 1H) | 3.47 | n/a                                                     | 3.69 | n/a                           | n/a          | -                | -   | -   | -                             | -                       |
| Fuc( $\alpha$ 2) | 5.14<br>(d, $J = 2.9$ Hz, 1H) | 3.60 | n/a                                                     | n/a  | 4.05<br>(q, $J = 6.4$ Hz, 1H) | -            | -                | -   | -   | 1.07<br>(d, $J = 6.5$ Hz, 3H) | -                       |
| Neu5Ac           | -                             | -    | 1.54 – axial<br>(dd, $J = 12.1$ Hz,<br>1H)<br>2.50 – eq | 3.48 | 3.62                          | 3.51         | n/a              | n/a | n/a | -                             | 1.91 - 1.84<br>(m, 15H) |

$^{13}\text{C}$  from BSHSQC (150 MHz,  $\text{D}_2\text{O}$ ):  $\delta$  (ppm)

|                  | C1     |
|------------------|--------|
| Glc              | 92.92  |
| Gal              | 102.83 |
| GlcNAc           | n/a    |
| Gal(2)           | 103.44 |
| GlcNAc(2)        | n/a    |
| Gal(3)           | 102.83 |
| GlcNAc(3)        | 102.74 |
| Gal(4)           | 102.77 |
| GlcNAc (4)       | 102.74 |
| Gal(5)           | 100.20 |
| Fuc( $\alpha$ 2) | 99.32  |

<sup>[a]</sup> Not assigned

<sup>[b]</sup> Not applicable

MALDI TOF-MS  $m/z$  calcd  $\text{C}_{106}\text{H}_{168}\text{N}_9\text{O}_{68}\text{Na}_2^-$  ( $M + 2\text{Na}$ )<sup>+</sup> exact 2700.9766, found 2700.7151.

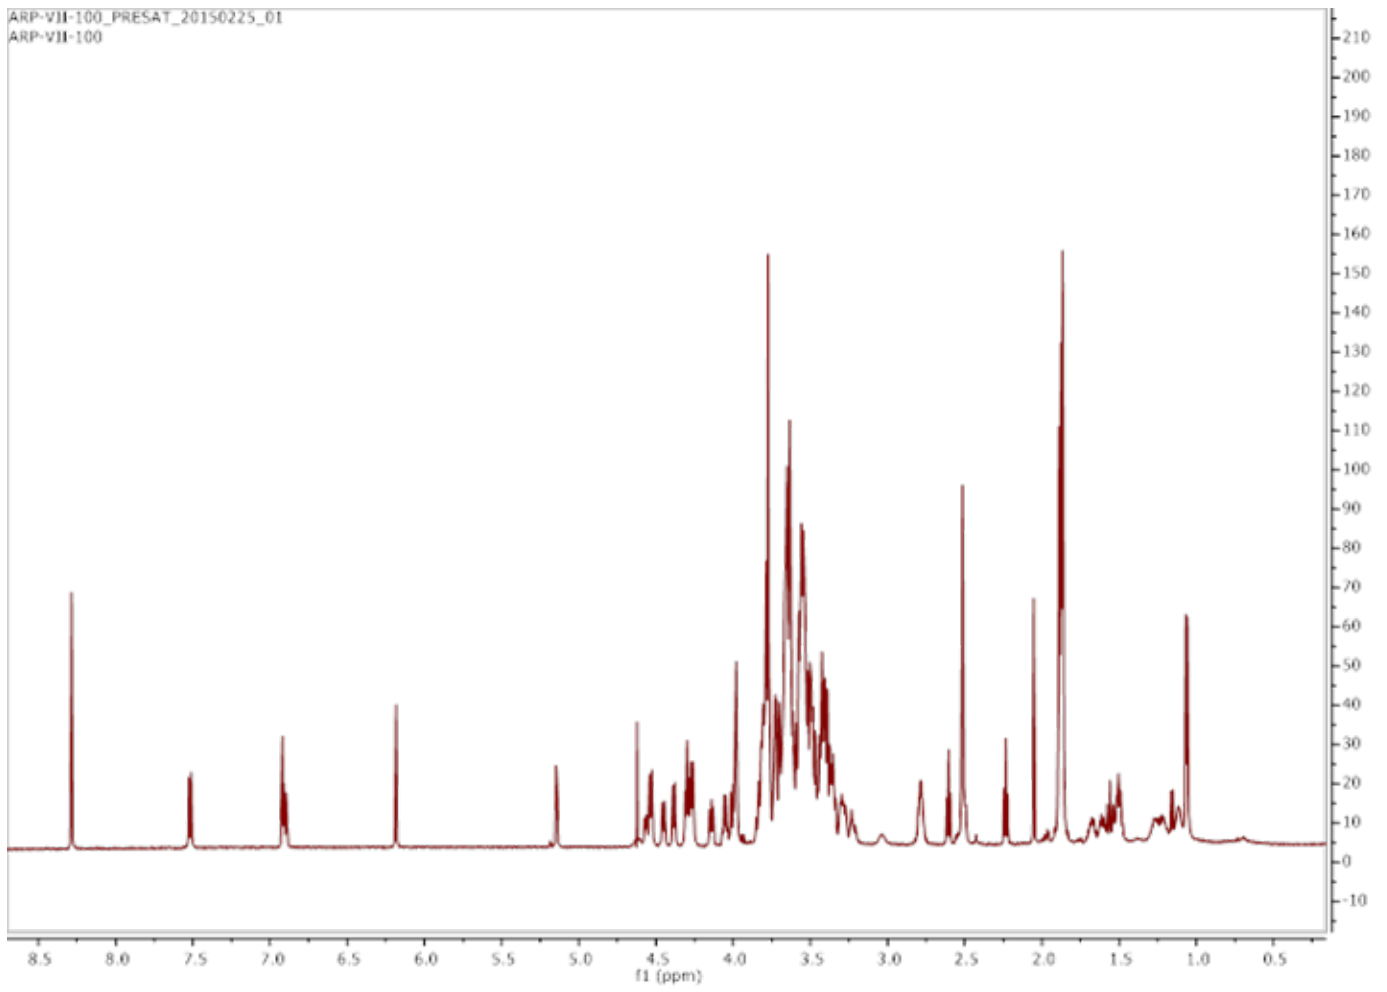



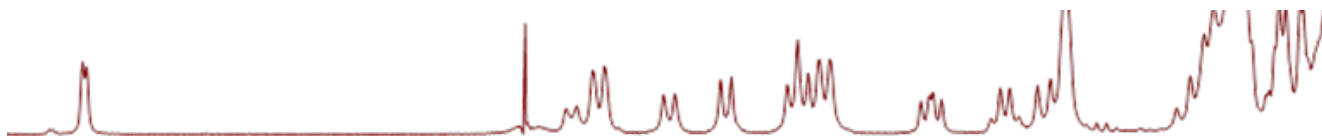

ARP-VII-100\_bsHSQCAD\_20150225\_01  
ARP-VII-100

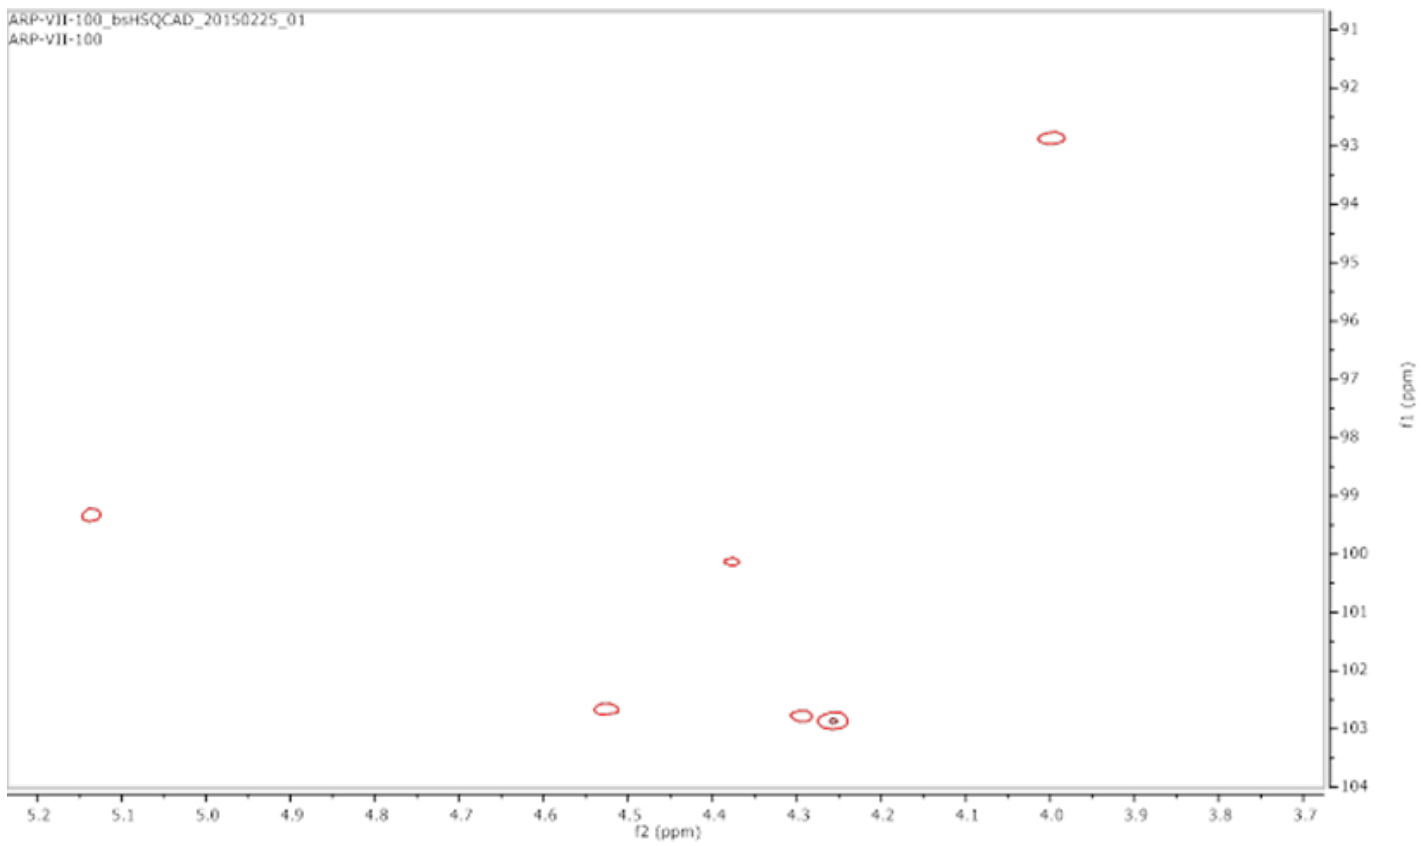

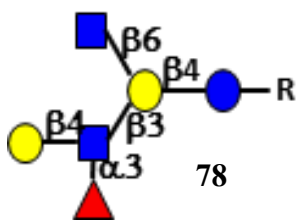

$^1\text{H}$  (600 MHz,  $\text{D}_2\text{O}$ ):  $\delta$  (ppm)

|                                  | H1                            | H2   | H3   | H4   | H5                 | H6           | $\text{CH}_3$                 | NHAc                   |
|----------------------------------|-------------------------------|------|------|------|--------------------|--------------|-------------------------------|------------------------|
| <b>Glc</b>                       | 4.00<br>(d, $J = 9.2$ Hz, 1H) | 3.36 | 3.43 | 3.49 | n/a <sup>[a]</sup> | n/a          | -                             | -                      |
| <b>Gal</b>                       | 4.24<br>(d, $J = 7.2$ Hz, 1H) | 3.40 | 3.54 | 4.00 | n/a                | 3.82<br>3.66 | -                             | -                      |
| <b>GlcNAc</b>                    | 4.53<br>(d, $J = 8.6$ Hz, 1H) | 3.79 | 3.73 | 3.43 | n/a                | n/a          | -                             | 1.91 - 1.81<br>(m, 6H) |
| <b>Gal(2)</b>                    | 4.29<br>(d, $J = 7.3$ Hz, 1H) | 3.33 | 3.51 | 3.75 | n/a                | n/a          | -                             | -                      |
| <b>GlcNAc(2)</b>                 | 4.42<br>(d, $J = 8.1$ Hz, 1H) | 3.52 | 3.41 | 3.30 | n/a                | n/a          | -                             | 1.91 - 1.81<br>(m, 6H) |
| <b>Fuc(<math>\alpha</math>3)</b> | 4.96                          | 3.53 | 3.76 | 3.65 | 4.68               | -            | 1.01<br>(d, $J = 5.9$ Hz, 3H) | -                      |

$^{13}\text{C}$  from BSHSQC (150 MHz,  $\text{D}_2\text{O}$ ):  $\delta$  (ppm)

|                                  | C1     |
|----------------------------------|--------|
| <b>Glc</b>                       | 92.81  |
| <b>Gal</b>                       | 102.92 |
| <b>GlcNAc</b>                    | 102.47 |
| <b>Gal(2)</b>                    | 101.67 |
| <b>GlcNAc(2)</b>                 | 101.03 |
| <b>Fuc(<math>\alpha</math>3)</b> | 98.49  |

<sup>[a]</sup> Not assigned

<sup>[b]</sup> Not applicable

MALDI TOF-MS  $m/z$  calcd  $\text{C}_{61}\text{H}_{96}\text{N}_6\text{O}_{35}\text{Na}^-$  ( $\text{M} + \text{Na}$ )<sup>+</sup> exact 1495.5814, found 1495.4545.

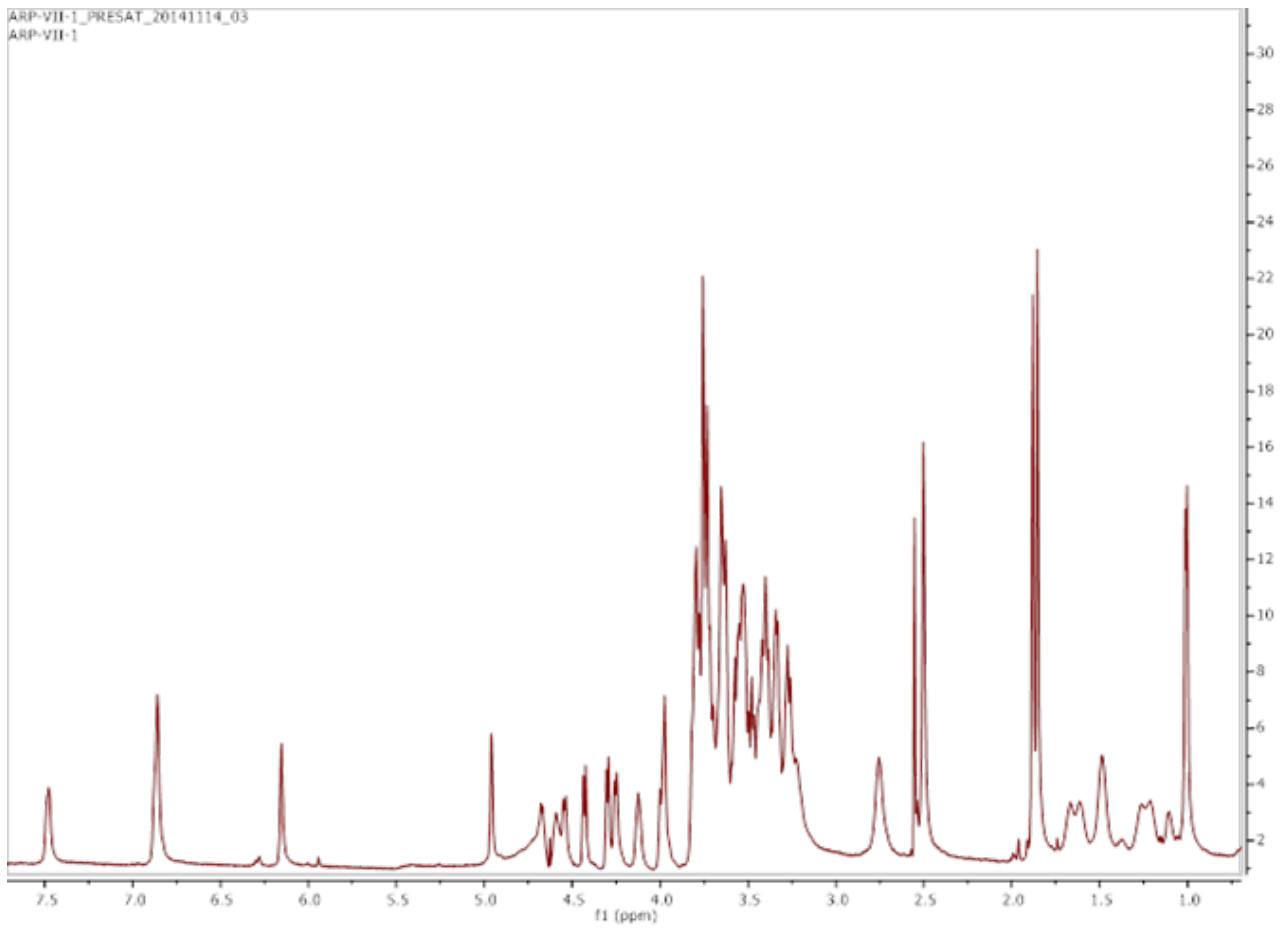

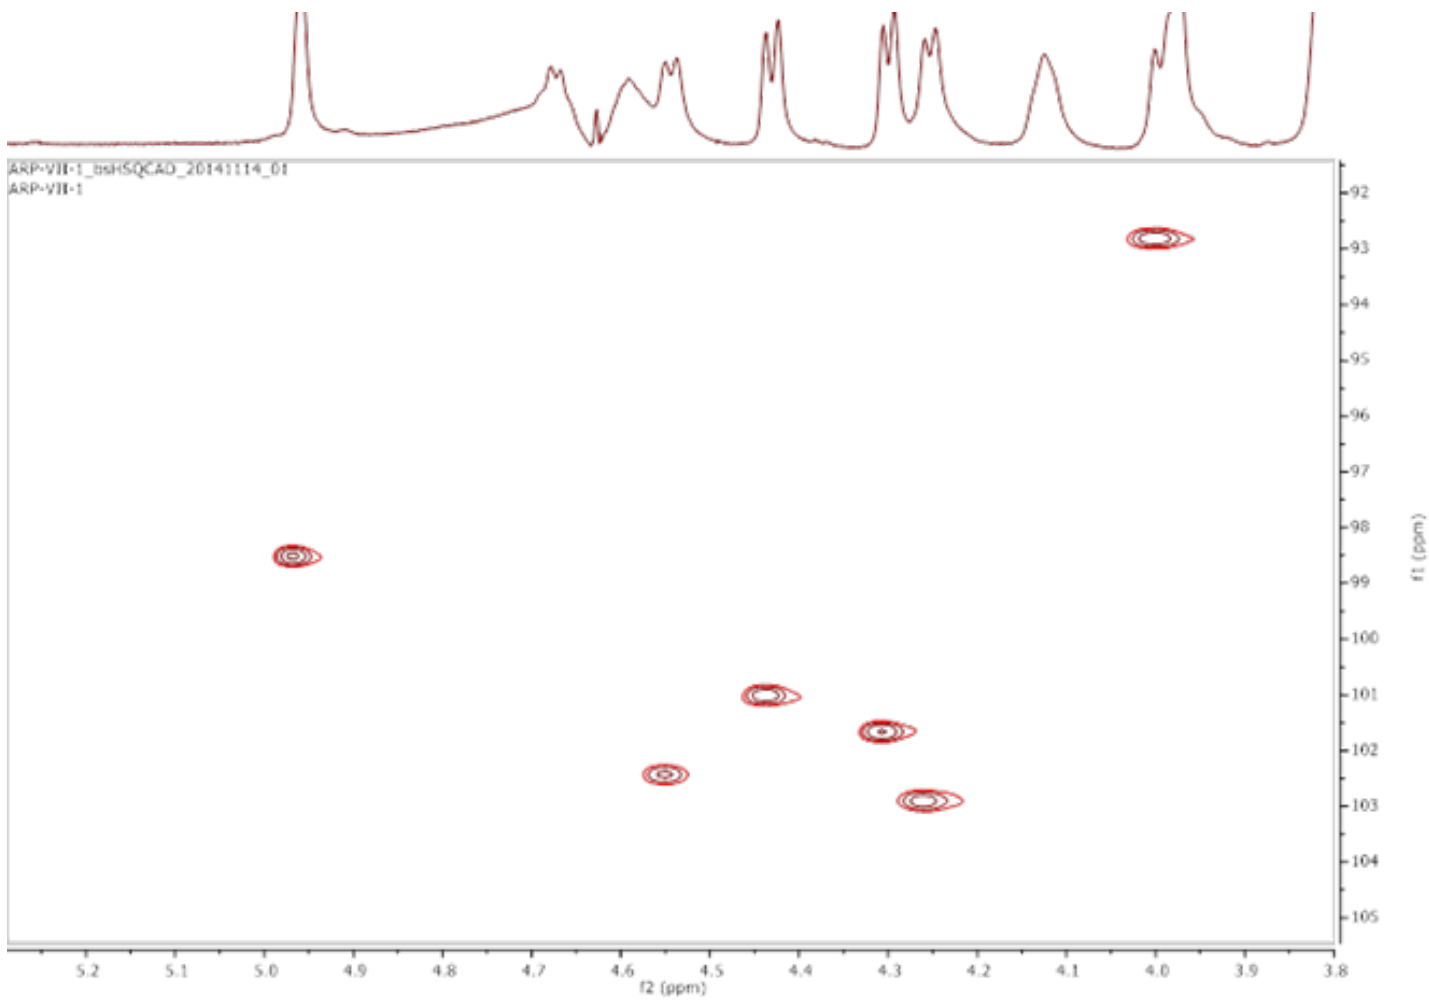

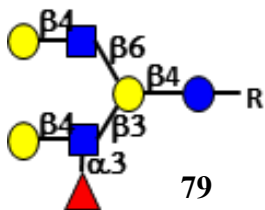

$^1\text{H}$  (600 MHz,  $\text{D}_2\text{O}$ ):  $\delta$  (ppm)

|                  | H1                            | H2   | H3   | H4   | H5                 | H6           | $\text{CH}_3$                 | NHAc                   |
|------------------|-------------------------------|------|------|------|--------------------|--------------|-------------------------------|------------------------|
| Glc              | 4.00<br>(d, $J = 9.2$ Hz, 1H) | 3.34 | 3.40 | 3.47 | n/a <sup>[a]</sup> | n/a          | -                             | -                      |
| Gal              | 4.27                          | 3.40 | 3.53 | 3.97 | n/a                | 3.82<br>3.66 | -                             | -                      |
| GlcNAc           | 4.54<br>(d, $J = 8.6$ Hz, 1H) | 3.78 | 3.71 | 3.41 | n/a                | n/a          | -                             | 1.91 - 1.81<br>(m, 6H) |
| Gal(2)           | 4.31<br>(d, $J = 7.8$ Hz, 1H) | 3.33 | 3.49 | 3.73 | n/a                | n/a          | -                             | -                      |
| GlcNAc(2)        | 4.45<br>(d, $J = 8.3$ Hz, 1H) | 3.56 | 3.51 | 3.42 | n/a                | n/a          | -                             | 1.91 - 1.81<br>(m, 6H) |
| Gal(3)           | 4.29                          | 3.35 | 3.48 | 3.74 | n/a                | n/a          |                               |                        |
| Fuc( $\alpha$ 3) | 4.96<br>(d, $J = 3.9$ Hz, 1H) | 3.53 | 3.76 | 3.65 | 4.68               | -            | 1.01<br>(d, $J = 6.6$ Hz, 3H) | -                      |

$^{13}\text{C}$  from BSHSQC (150 MHz,  $\text{D}_2\text{O}$ ):  $\delta$  (ppm)

|                  | C1     |
|------------------|--------|
| Glc              | 92.81  |
| Gal              | 102.94 |
| GlcNAc           | 102.44 |
| Gal(2)           | 101.69 |
| GlcNAc(2)        | 101.00 |
| Gal(3)           | 102.82 |
| Fuc( $\alpha$ 3) | 98.58  |

<sup>[a]</sup> Not assigned

<sup>[b]</sup> Not applicable

MALDI TOF-MS  $m/z$  calcd  $\text{C}_{67}\text{H}_{106}\text{N}_6\text{O}_{40}^-$  ( $\text{M} + \text{Na}$ )<sup>+</sup> exact 1657.6343, found 1657.0420.

ARP-VII-14\_PRESAT\_20141203\_01  
ARP-VII-14

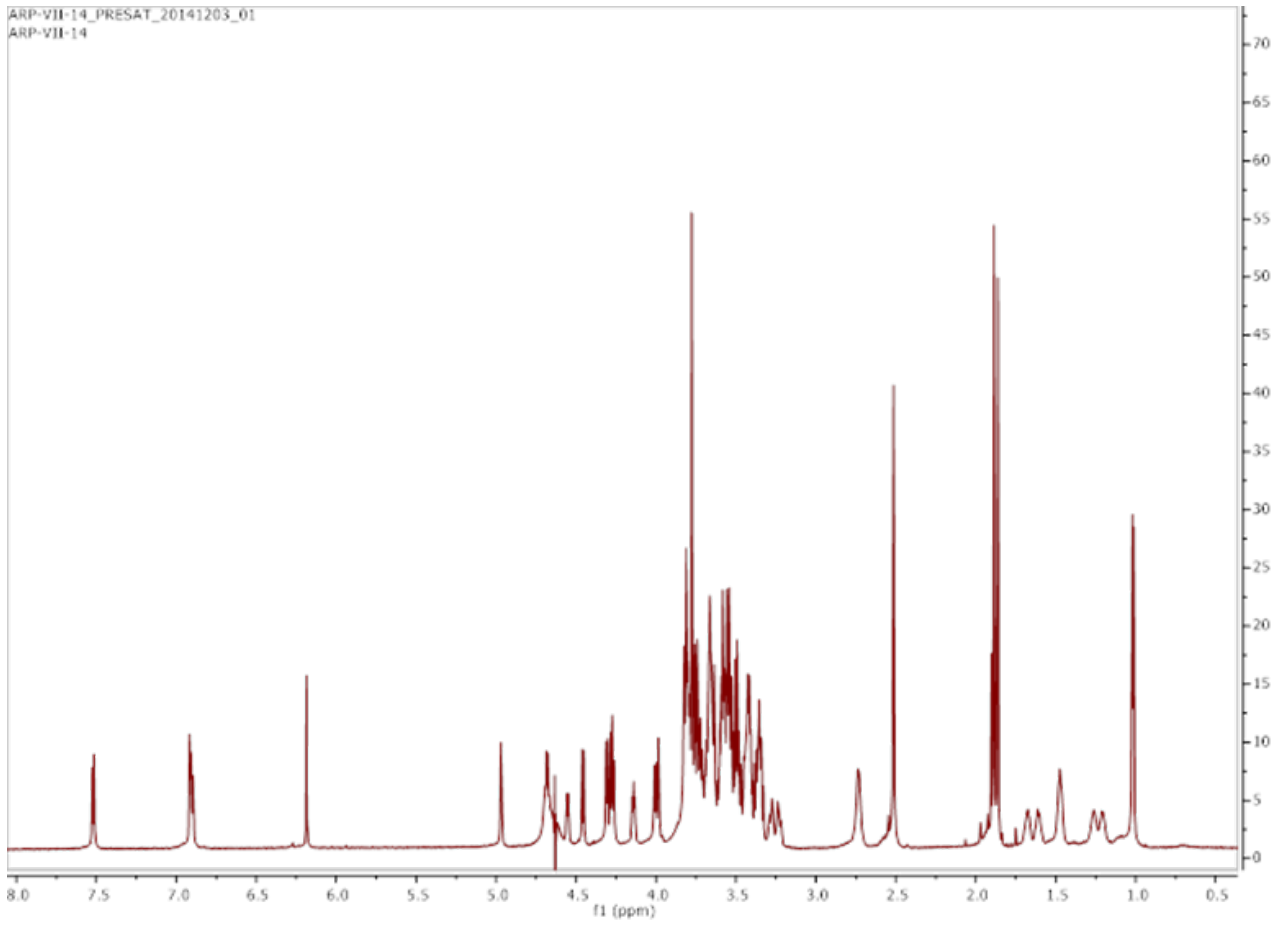

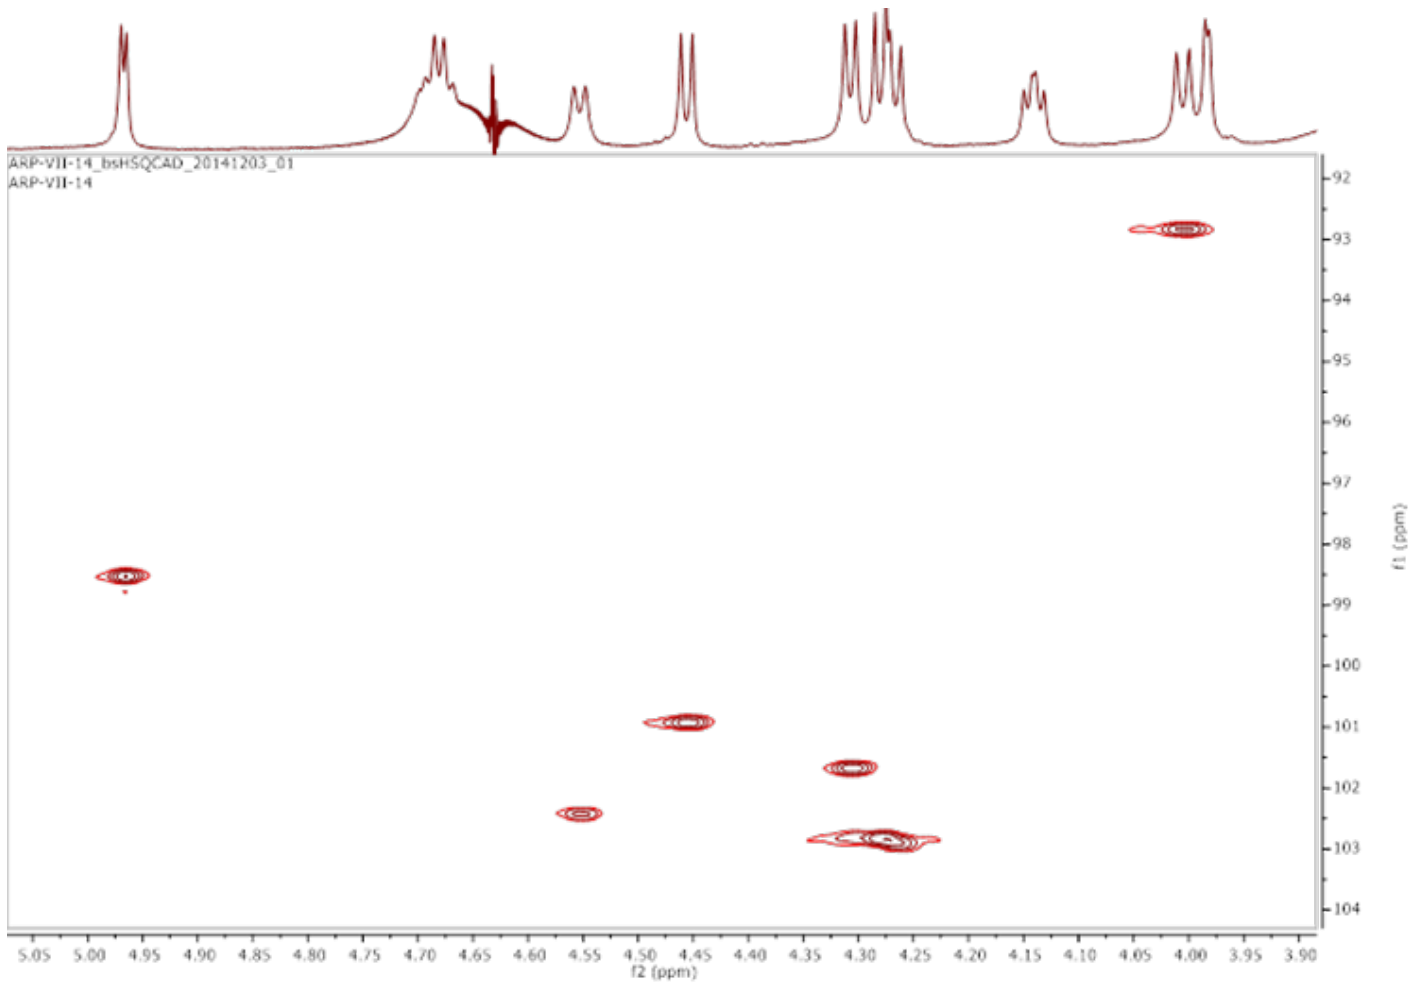

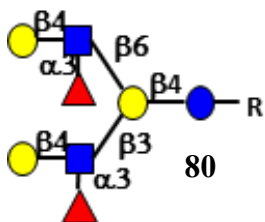

$^1\text{H}$  (800 MHz,  $\text{D}_2\text{O}$ ):  $\delta$  (ppm)

|                     | H1                            | H2   | H3   | H4   | H5                 | H6           | $\text{CH}_3$                 | NHAc                   |
|---------------------|-------------------------------|------|------|------|--------------------|--------------|-------------------------------|------------------------|
| Glc                 | 4.00<br>(d, $J = 9.4$ Hz, 1H) | 3.32 | 3.39 | 3.47 | n/a <sup>[a]</sup> | n/a          | -                             | -                      |
| Gal                 | 4.25                          | 3.39 | 3.51 | 3.96 | n/a                | 3.82<br>3.66 | -                             | -                      |
| GlcNAc              | 4.54<br>(d, $J = 7.9$ Hz, 1H) | 3.78 | 3.71 | 3.41 | n/a                | n/a          | -                             | 1.91 - 1.81<br>(m, 6H) |
| Gal(2)              | 4.29<br>(d, $J = 7.9$ Hz, 1H) | 3.33 | 3.47 | 3.73 | n/a                | n/a          | -                             | -                      |
| GlcNAc(2)           | 4.45<br>(d, $J = 6.8$ Hz, 1H) | 3.73 | n/a  | 3.42 | n/a                | n/a          | -                             | 1.91 - 1.81<br>(m, 6H) |
| Gal(3)              | 4.27                          | 3.31 | 3.46 | 3.71 | n/a                | n/a          |                               |                        |
| Fuc(1)( $\alpha$ 3) | 4.96<br>(d, $J = 3.5$ Hz, 1H) | 3.51 | 3.73 | 3.62 | 4.66               | -            | 1.01<br>(d, $J = 6.6$ Hz, 3H) | -                      |
| Fuc(2)( $\alpha$ 3) | 4.92<br>(d, $J = 3.5$ Hz, 1H) | 3.51 | 3.71 | 3.61 | 4.66               | -            | 1.01                          | -                      |

$^{13}\text{C}$  from BSHSQC (200 MHz,  $\text{D}_2\text{O}$ ):  $\delta$  (ppm)

|                     | C1     |
|---------------------|--------|
| Glc                 | 92.82  |
| Gal                 | 102.97 |
| GlcNAc              | 102.38 |
| Gal(2)              | 101.68 |
| GlcNAc(2)           | 100.66 |
| Gal(3)              | 101.68 |
| Fuc(1)( $\alpha$ 3) | 98.52  |
| Fuc(2)( $\alpha$ 3) | 98.56  |

<sup>[a]</sup> Not assigned

<sup>[b]</sup> Not applicable

MALDI TOF-MS  $m/z$  calcd  $\text{C}_{73}\text{H}_{116}\text{N}_6\text{O}_{44}\text{Na}^-$  ( $\text{M} + \text{Na}$ )<sup>+</sup> exact 1803.6922, found 1804.5262.



ARP-VI-10\_PRESAY\_20140813\_01  
ARP-VI-10

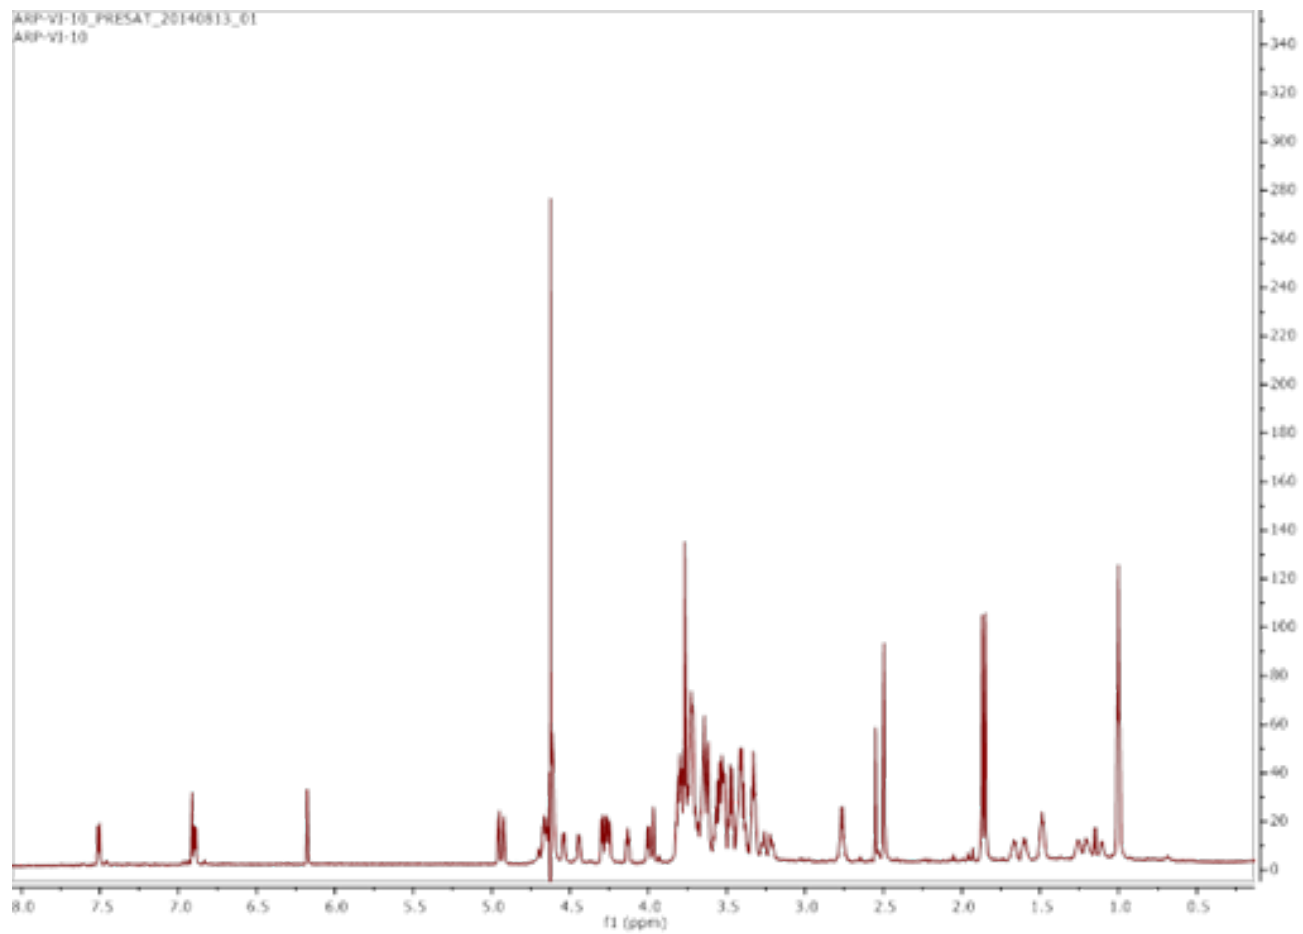

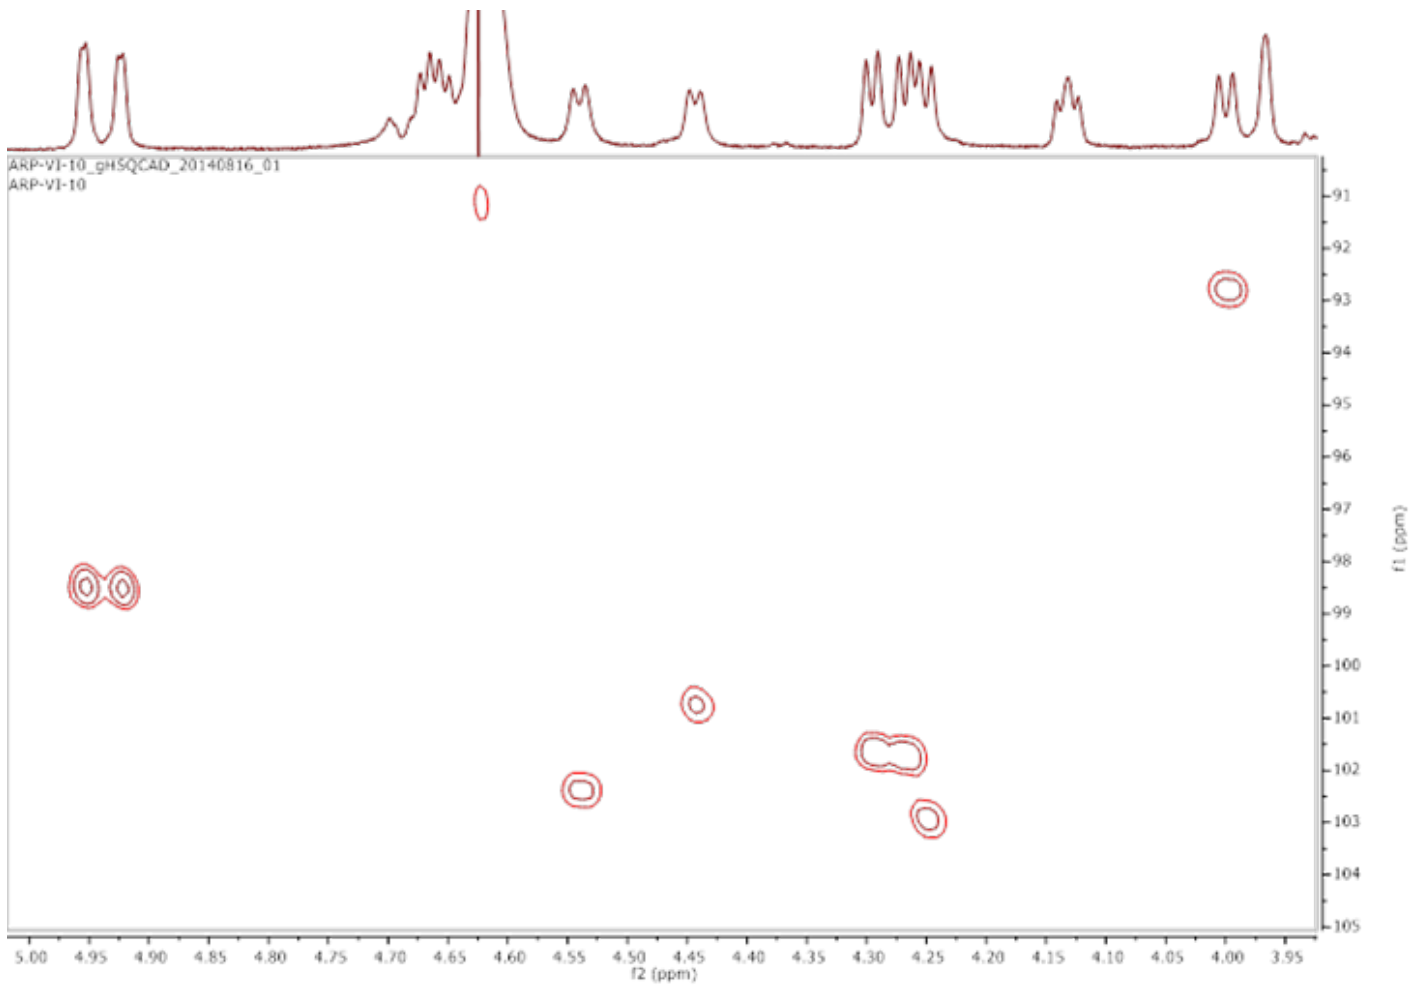

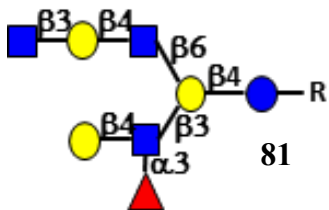

$^1\text{H}$  (600 MHz,  $\text{D}_2\text{O}$ ):  $\delta$  (ppm)

|                  | H1                            | H2   | H3   | H4   | H5                 | H6           | $\text{CH}_3$                 | NHAc                   |
|------------------|-------------------------------|------|------|------|--------------------|--------------|-------------------------------|------------------------|
| Glc              | 4.00                          | 3.31 | 3.42 | 3.48 | n/a <sup>[a]</sup> | n/a          | -                             | -                      |
| Gal              | 4.27                          | 3.40 | 3.56 | 3.98 | n/a                | 3.82<br>3.66 | -                             | -                      |
| GlcNAc           | 4.54<br>(d, $J = 7.4$ Hz, 1H) | 3.78 | 3.71 | 3.41 | n/a                | n/a          | -                             | 1.91 - 1.81<br>(m, 9H) |
| Gal(2)           | 4.31<br>(d, $J = 7.6$ Hz, 1H) | 3.34 | 3.49 | 3.73 | n/a                | n/a          | -                             | -                      |
| GlcNAc(2)        | 4.45<br>(d, $J = 8.2$ Hz, 1H) | 3.56 | 3.51 | 3.42 | n/a                | n/a          | -                             | 1.91 - 1.81<br>(m, 9H) |
| Gal(3)           | 4.27                          | 3.42 | 3.56 | 3.98 | n/a                | n/a          | -                             | -                      |
| GlcNAc(3)        | 4.52<br>(d, $J = 8.7$ Hz, 1H) | 3.58 | 3.41 | 3.29 | n/a                | n/a          | -                             | 1.91 - 1.81<br>(m, 9H) |
| Fuc( $\alpha$ 3) | 4.96<br>(d, $J = 3.6$ Hz, 1H) | 3.53 | 3.76 | 3.65 | 4.68               | -            | 1.01<br>(d, $J = 6.3$ Hz, 3H) | -                      |

$^{13}\text{C}$  from BSHSQC (150 MHz,  $\text{D}_2\text{O}$ ):  $\delta$  (ppm)

|                  | C1     |
|------------------|--------|
| Glc              | 92.79  |
| Gal              | 102.78 |
| GlcNAc           | 102.40 |
| Gal(2)           | 101.69 |
| GlcNAc(2)        | 101.93 |
| Gal(3)           | 102.78 |
| GlcNAc(3)        | 102.78 |
| Fuc( $\alpha$ 3) | 98.58  |

<sup>[a]</sup> Not assigned

<sup>[b]</sup> Not applicable

MALDI TOF-MS  $m/z$  calcd  $\text{C}_{75}\text{H}_{119}\text{N}_7\text{O}_{45}\text{Na}^-$  ( $\text{M} + \text{Na}$ )<sup>+</sup> exact 1860.7136, found 1860.5052.

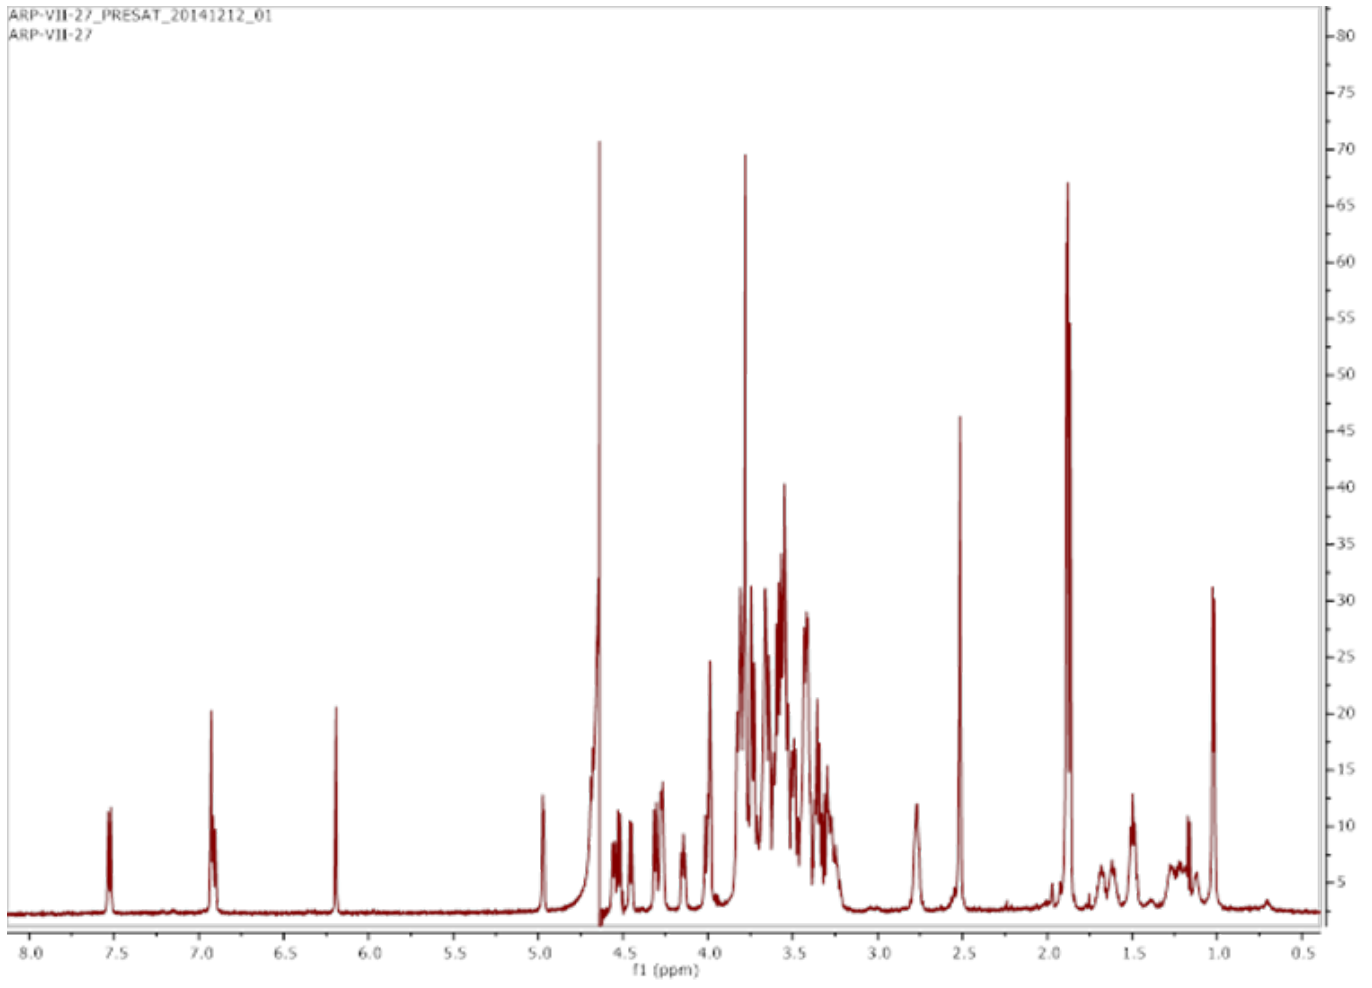

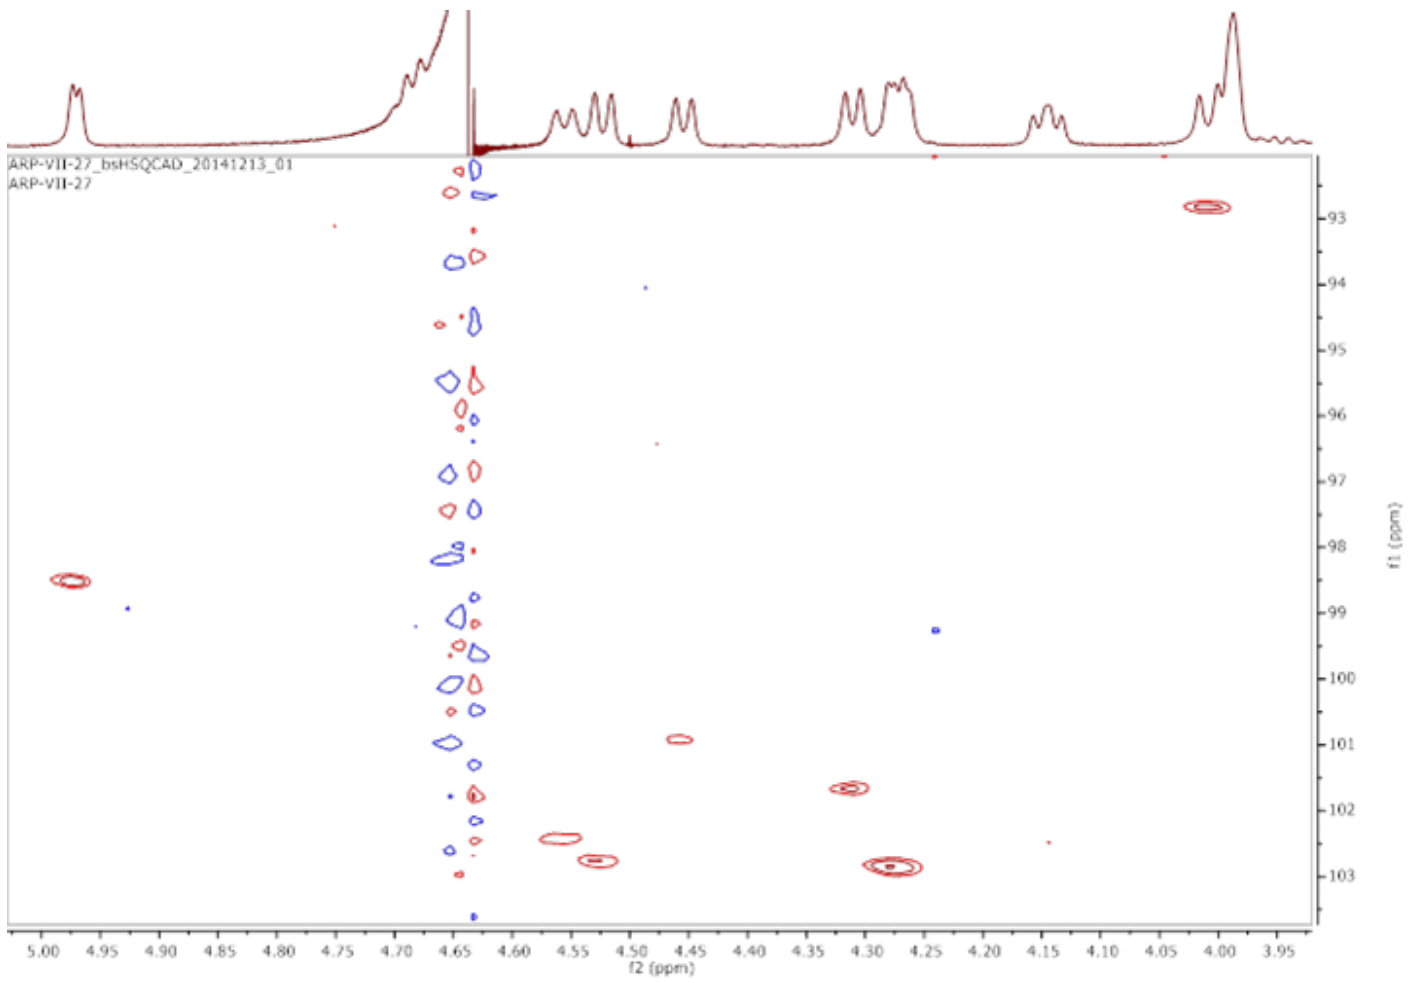

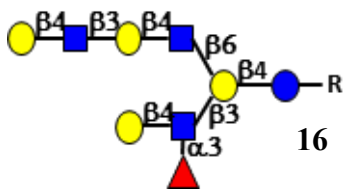

$^1\text{H}$  (800 MHz,  $\text{D}_2\text{O}$ ):  $\delta$  (ppm)

|                                  | H1                            | H2   | H3   | H4   | H5                 | H6           | $\text{CH}_3$                 | NHAc                   |
|----------------------------------|-------------------------------|------|------|------|--------------------|--------------|-------------------------------|------------------------|
| <b>Glc</b>                       | 4.00<br>(d, $J = 9.3$ Hz, 1H) | 3.33 | 3.41 | 3.48 | n/a <sup>[a]</sup> | n/a          | -                             | -                      |
| <b>Gal</b>                       | 4.27                          | 3.40 | 3.54 | 3.98 | n/a                | 3.82<br>3.66 | -                             | -                      |
| <b>GlcNAc</b>                    | 4.53                          | 3.78 | 3.71 | n/a  | n/a                | n/a          | -                             | 1.91 - 1.81<br>(m, 9H) |
| <b>Gal(2)</b>                    | 4.31<br>(d, $J = 7.6$ Hz, 1H) | 3.36 | 3.49 | 3.76 | n/a                | n/a          | -                             | -                      |
| <b>GlcNAc(2)</b>                 | 4.45<br>(d, $J = 8.4$ Hz, 1H) | 3.56 | 3.51 | 3.42 | n/a                | n/a          | -                             | 1.91 - 1.81<br>(m, 9H) |
| <b>Gal(3)</b>                    | 4.27                          | 3.40 | 3.54 | 3.98 | n/a                | n/a          |                               |                        |
| <b>GlcNAc(3)</b>                 | 4.54                          | 3.62 | 3.57 | 3.42 | n/a                | n/a          | -                             | 1.91 - 1.81<br>(m, 9H) |
| <b>Gal(4)</b>                    | 4.30                          | 3.32 | 3.49 | 3.74 | n/a                | n/a          | n/a                           | n/a                    |
| <b>Fuc(<math>\alpha</math>3)</b> | 4.96<br>(d, $J = 3.7$ Hz, 1H) | 3.53 | 3.76 | 3.65 | 4.68               | -            | 1.02<br>(d, $J = 6.6$ Hz, 3H) | -                      |

$^{13}\text{C}$  from BSHSQC (200 MHz,  $\text{D}_2\text{O}$ ):  $\delta$  (ppm)

|                                  | C1     |
|----------------------------------|--------|
| <b>Glc</b>                       | 92.89  |
| <b>Gal</b>                       | 102.88 |
| <b>GlcNAc</b>                    | n/a    |
| <b>Gal(2)</b>                    | 101.65 |
| <b>GlcNAc(2)</b>                 | 100.98 |
| <b>Gal(3)</b>                    | 102.88 |
| <b>GlcNAc(3)</b>                 | n/a    |
| <b>Gal(4)</b>                    | 102.81 |
| <b>Fuc(<math>\alpha</math>3)</b> | 98.53  |

<sup>[a]</sup> Not assigned

<sup>[b]</sup> Not applicable

MALDI TOF-MS  $m/z$  calcd  $\text{C}_{81}\text{H}_{129}\text{N}_7\text{O}_{50}\text{Na}^-$  ( $\text{M} + \text{Na}$ )<sup>+</sup> exact 2022.7664, found 2023.5796.

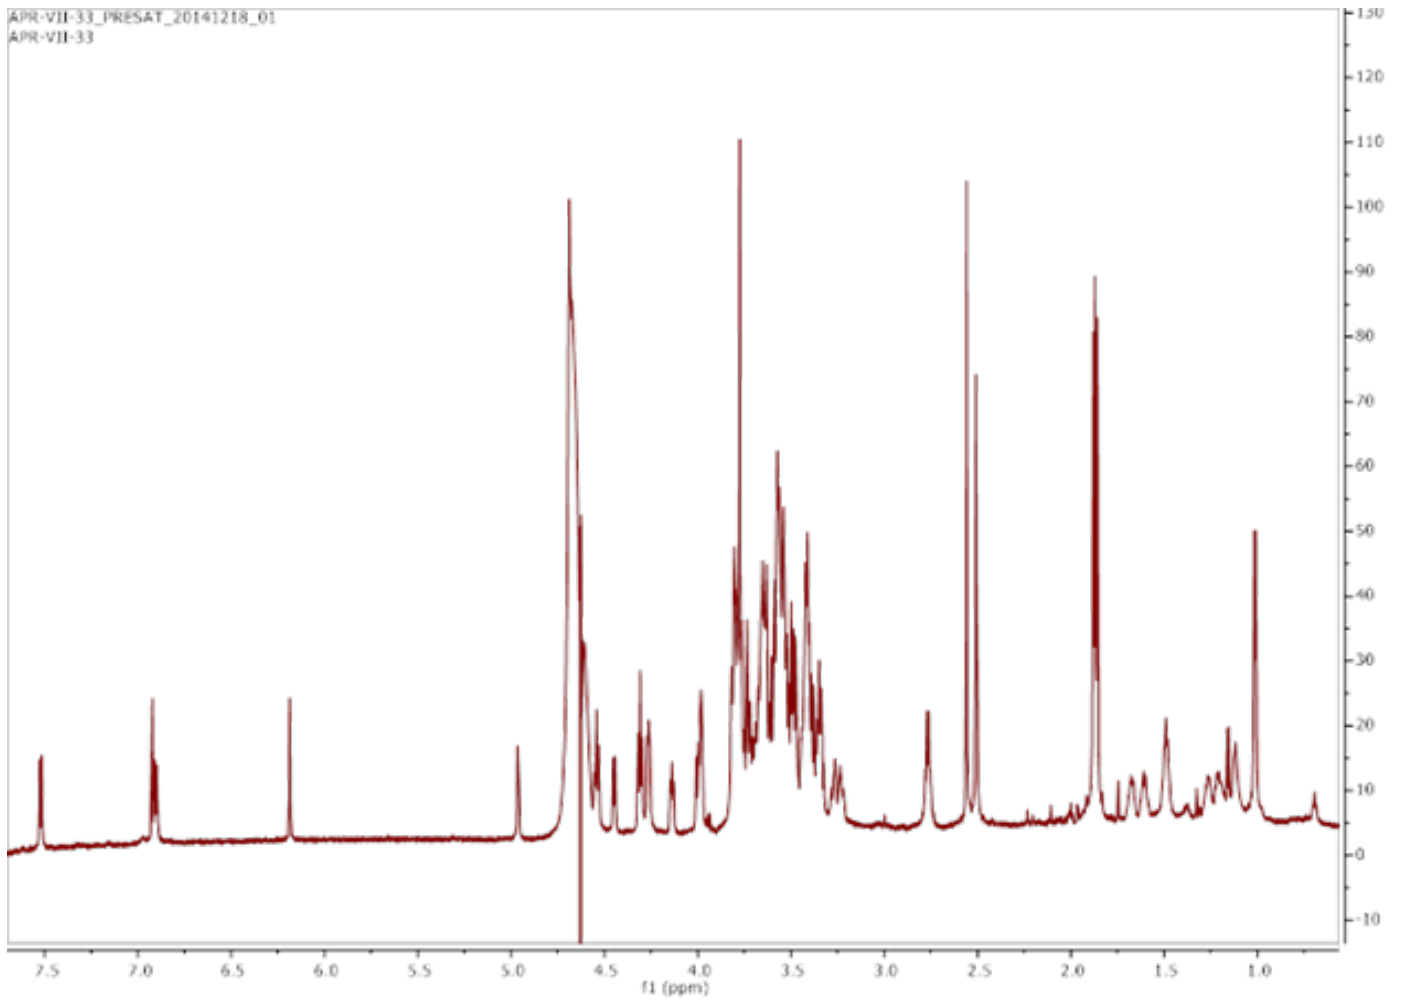

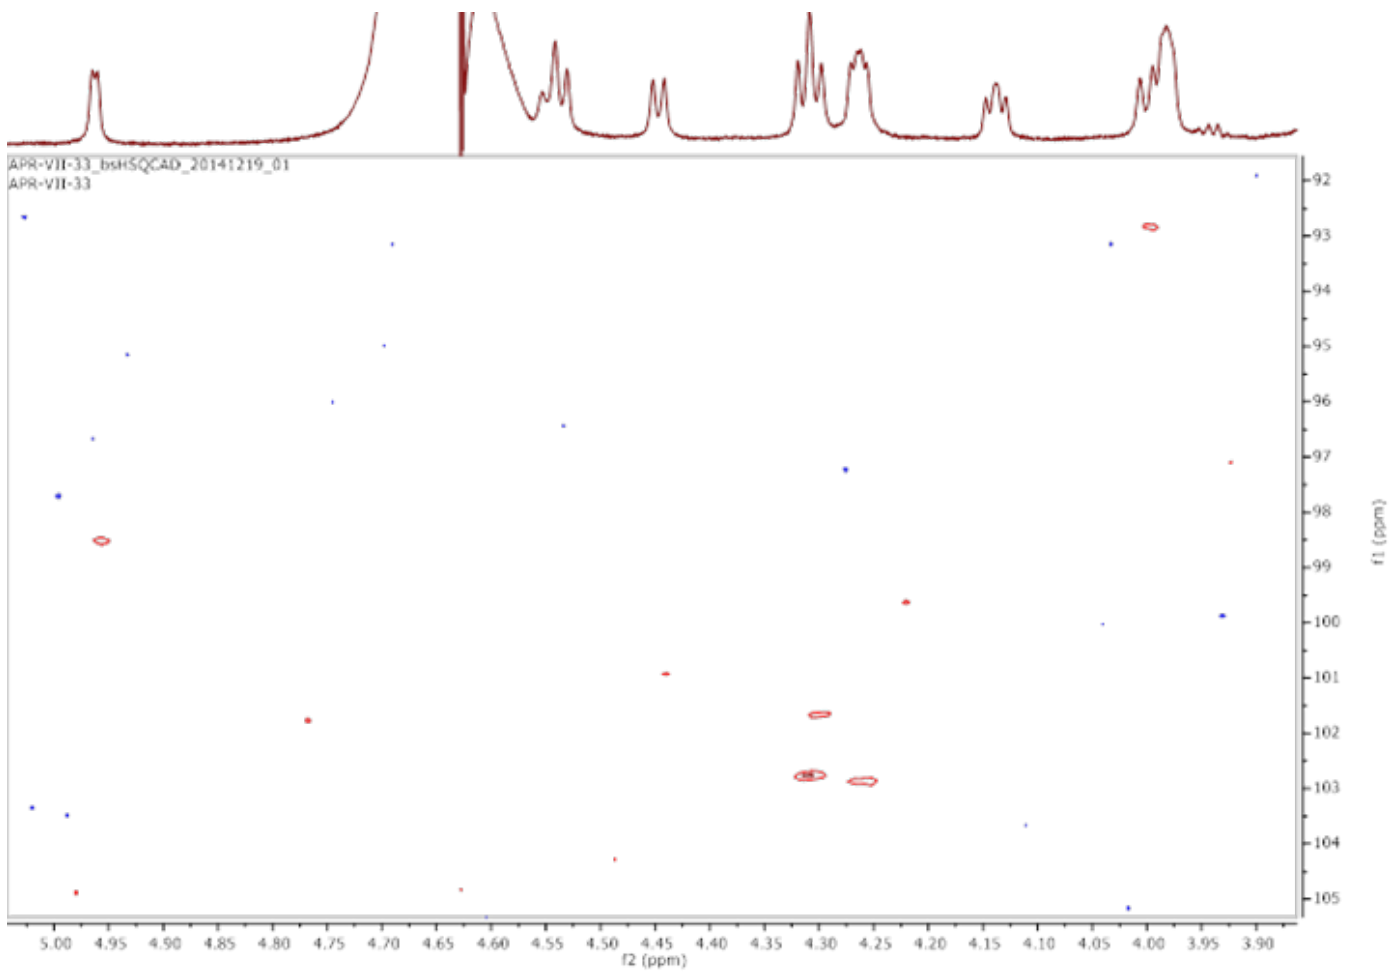



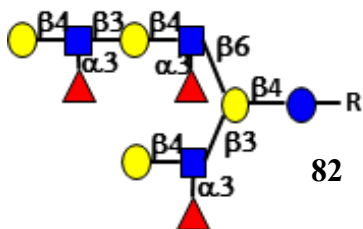

$^1\text{H}$  (800 MHz,  $\text{D}_2\text{O}$ ):  $\delta$  (ppm)

|                     | H1                             | H2   | H3   | H4   | H5                 | H6  | $\text{CH}_3$                 | NHAc                   |
|---------------------|--------------------------------|------|------|------|--------------------|-----|-------------------------------|------------------------|
| Glc                 | 4.00<br>(d, $J = 8.9$ Hz, 1H)  | 3.34 | 3.40 | 3.48 | n/a <sup>[a]</sup> | n/a | -                             | -                      |
| Gal                 | 4.25<br>(d, $J = 7.8$ Hz, 1H)  | 3.41 | 3.53 | 3.98 | n/a                | n/a | -                             | -                      |
| GlcNAc              | 4.54<br>(d, $J = 7.4$ Hz, 1H)  | 3.78 | 3.71 | 3.41 | n/a                | n/a | -                             | 1.91 - 1.81<br>(m, 9H) |
| Gal(2)              | 4.30<br>(d, $J = 7.2$ Hz, 2H)  | 3.34 | 3.49 | 3.73 | n/a                | n/a | -                             | -                      |
| GlcNAc(2)           | 4.45<br>(d, $J = 10.9$ Hz, 1H) | 3.73 | 3.71 | 3.42 | n/a                | n/a | -                             | 1.91 - 1.81<br>(m, 9H) |
| Gal(3)              | 4.25<br>(d, $J = 7.8$ Hz, 1H)  | 3.33 | 3.53 | 3.92 | n/a                | n/a | -                             | -                      |
| GlcNAc(3)           | 4.54<br>(d, $J = 8.7$ Hz, 1H)  | 3.79 | 3.71 | 3.41 | n/a                | n/a | -                             | 1.91 - 1.81<br>(m, 9H) |
| Gal(4)              | 4.30<br>(d, $J = 7.2$ Hz, 2H)  | 3.33 | 3.49 | 3.73 | n/a                | n/a | -                             | -                      |
| Fuc(1)( $\alpha$ 3) | 4.97                           | 3.53 | 3.74 | 3.63 | 4.68               | -   | 1.00<br>(d, $J = 6.4$ Hz, 6H) | -                      |
| Fuc(2)( $\alpha$ 3) | 4.91<br>(d, $J = 3.4$ Hz, 1H)  | 3.52 | 3.71 | 3.60 | 4.64               | -   | 0.97<br>(d, $J = 6.3$ Hz, 3H) | -                      |
| Fuc(3)( $\alpha$ 3) | 4.97                           | 3.53 | 3.74 | 3.63 | 4.68               | -   | 1.00<br>(d, $J = 6.4$ Hz, 6H) | -                      |

$^{13}\text{C}$  from BSHSQC (200 MHz,  $\text{D}_2\text{O}$ ):  $\delta$  (ppm)

|                     | C1     |
|---------------------|--------|
| Glc                 | 92.85  |
| Gal                 | 102.95 |
| GlcNAc              | 102.44 |
| Gal(2)              | 101.73 |
| GlcNAc(2)           | 101.81 |
| Gal(3)              | 101.73 |
| GlcNAc(3)           | 102.44 |
| Gal(4)              | 101.73 |
| Fuc(1)( $\alpha$ 3) | 98.48  |
| Fuc(2)( $\alpha$ 3) | 98.77  |
| Fuc(3)( $\alpha$ 3) | 98.48  |

<sup>[a]</sup> Not assigned

<sup>[b]</sup> Not applicable

MALDI TOF-MS  $m/z$  calcd  $\text{C}_{93}\text{H}_{149}\text{N}_7\text{O}_{58}\text{Na}^-$  ( $\text{M} + \text{Na}$ )<sup>+</sup> exact 2314.8823, found 2314.0212.

ARP-VIII-92\_PRESAT\_20150711\_01  
ARP-VIII-92

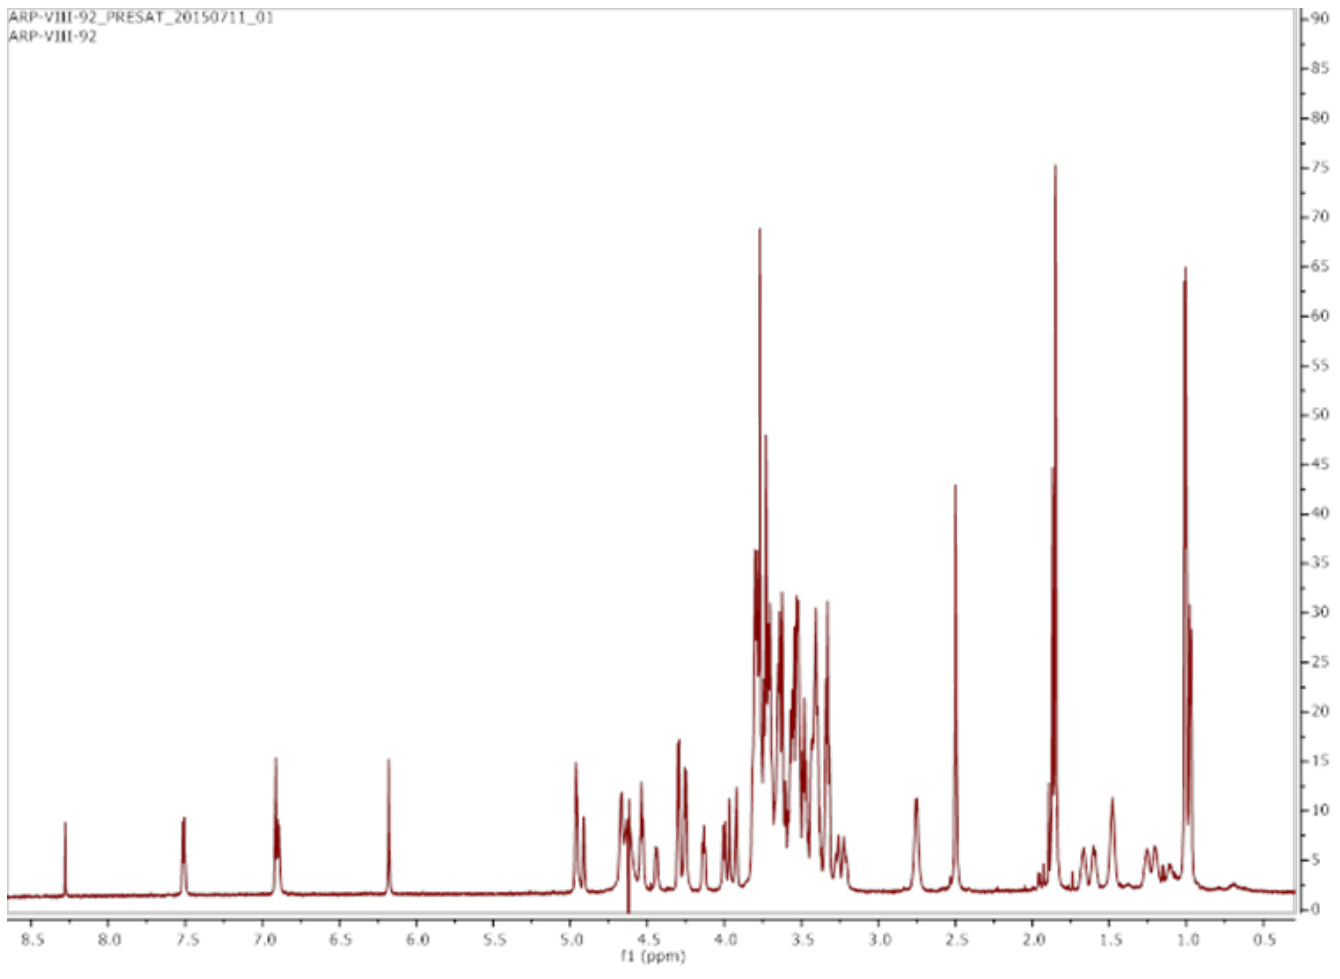

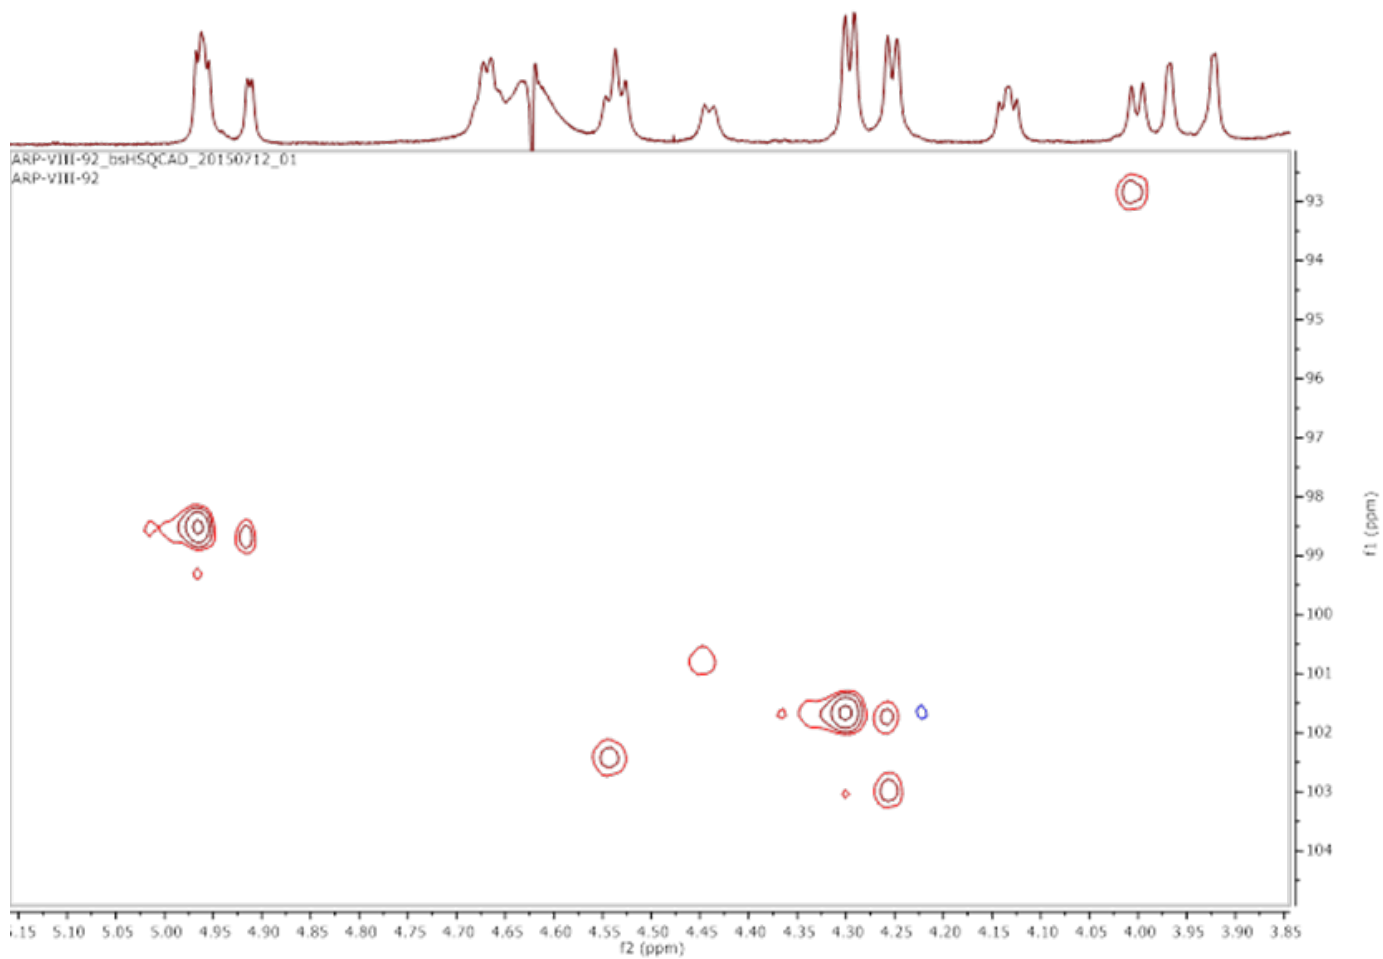

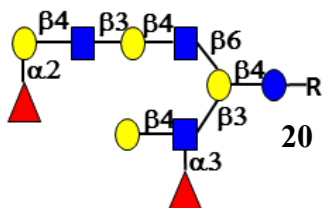

$^1\text{H}$  (600 MHz,  $\text{D}_2\text{O}$ ):  $\delta$  (ppm)

|                     | H1                            | H2   | H3   | H4   | H5                            | H6  | $\text{CH}_3$                 | NHAc                   |
|---------------------|-------------------------------|------|------|------|-------------------------------|-----|-------------------------------|------------------------|
| Glc                 | 4.00                          | 3.36 | 3.42 | 3.48 | n/a <sup>[a]</sup>            | n/a | -                             | -                      |
| Gal                 | 4.27                          | 3.42 | 3.54 | 3.98 | n/a                           | n/a | -                             | -                      |
| GlcNAc              | 4.54                          | 3.80 | 3.73 | 3.43 | n/a                           | n/a | -                             | 1.91 - 1.81<br>(m, 9H) |
| Gal(2)              | 4.31<br>(d, $J = 7.7$ Hz, 1H) | 3.34 | 3.50 | 3.74 | n/a                           | n/a | -                             | -                      |
| GlcNAc(2)           | 4.45<br>(d, $J = 8.0$ Hz, 1H) | 3.57 | n/a  | n/a  | n/a                           | n/a | -                             | 1.91 - 1.81<br>(m, 9H) |
| Gal(3)              | 4.27                          | 3.42 | 3.54 | 3.98 | n/a                           | n/a | -                             | -                      |
| GlcNAc(3)           | 4.54                          | 3.80 | 3.73 | 3.43 | n/a                           | n/a | -                             | 1.91 - 1.81<br>(m, 9H) |
| Gal(4)              | 4.40<br>(d, $J = 7.6$ Hz, 1H) | 3.52 | n/a  | n/a  | n/a                           | n/a | -                             | -                      |
| Fuc(1)( $\alpha$ 3) | 4.96                          | 3.55 | 3.76 | 3.65 | 4.69                          | -   | 1.02<br>(d, $J = 6.4$ Hz, 3H) | -                      |
| Fuc(2)( $\alpha$ 2) | 5.15                          | 3.65 | n/a  | n/a  | 4.06<br>(q, $J = 6.4$ Hz, 1H) | -   | 1.08<br>(d, $J = 6.4$ Hz, 3H) | -                      |

$^{13}\text{C}$  from BSHSQC (150 MHz,  $\text{D}_2\text{O}$ ):  $\delta$  (ppm)

|                     | C1     |
|---------------------|--------|
| Glc                 | 92.91  |
| Gal                 | 102.86 |
| GlcNAc              | 102.62 |
| Gal(2)              | 101.66 |
| GlcNAc(2)           | 100.82 |
| Gal(3)              | 102.86 |
| GlcNAc(3)           | 102.62 |
| Gal(4)              | 100.03 |
| Fuc(1)( $\alpha$ 3) | 98.55  |
| Fuc(2)(2)           | 99.34  |

<sup>[a]</sup> Not assigned

<sup>[b]</sup> Not applicable

MALDI TOF-MS  $m/z$  calcd  $\text{C}_{87}\text{H}_{139}\text{N}_7\text{O}_{54}\text{Na}^-$  ( $\text{M} + \text{Na}$ )<sup>+</sup> exact 2168.8244, found 2167.9634.

ARP-VIII-93\_PRESAT\_20150710\_01  
ARP-VIII-93

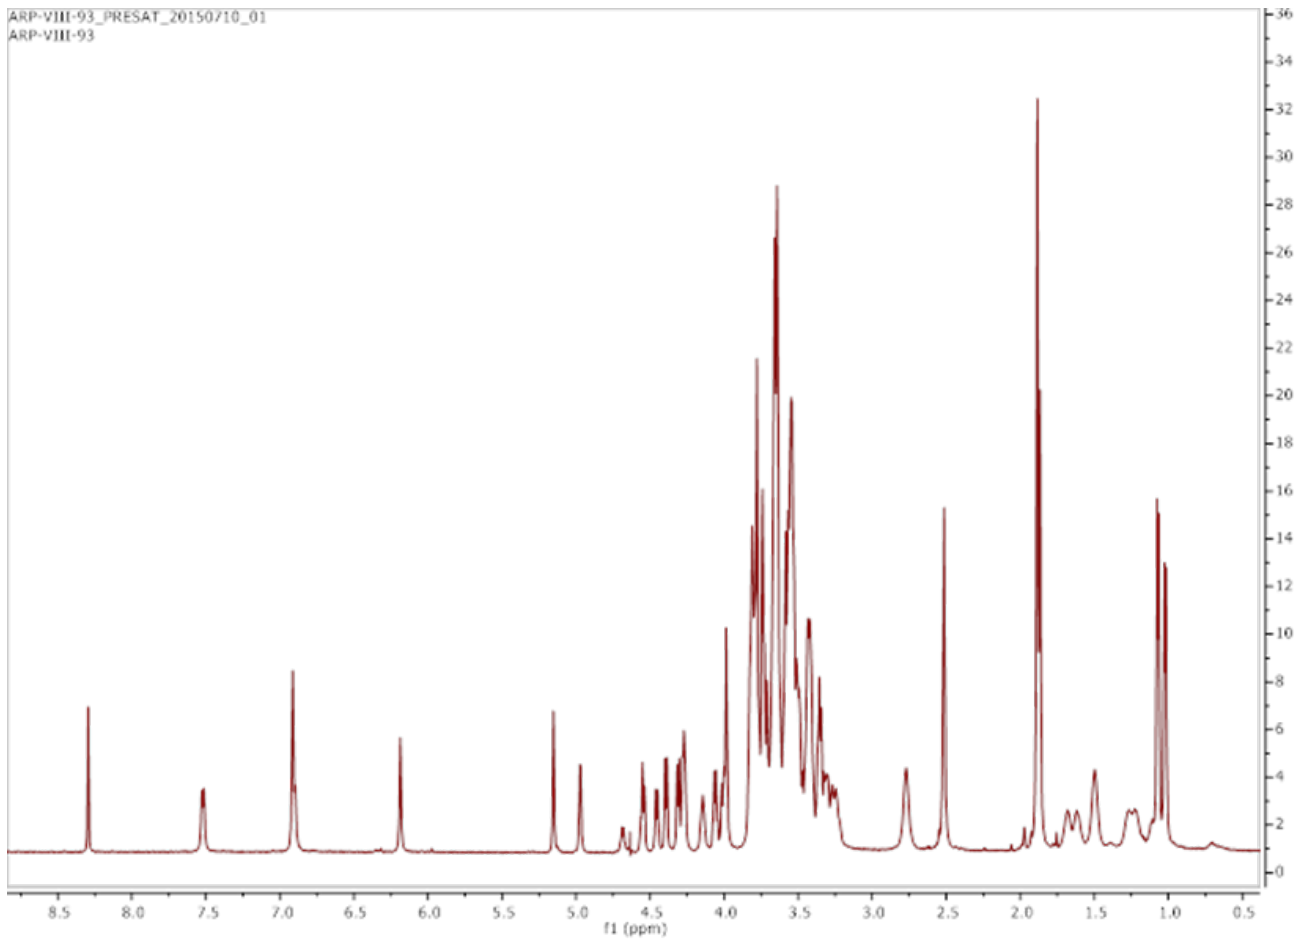

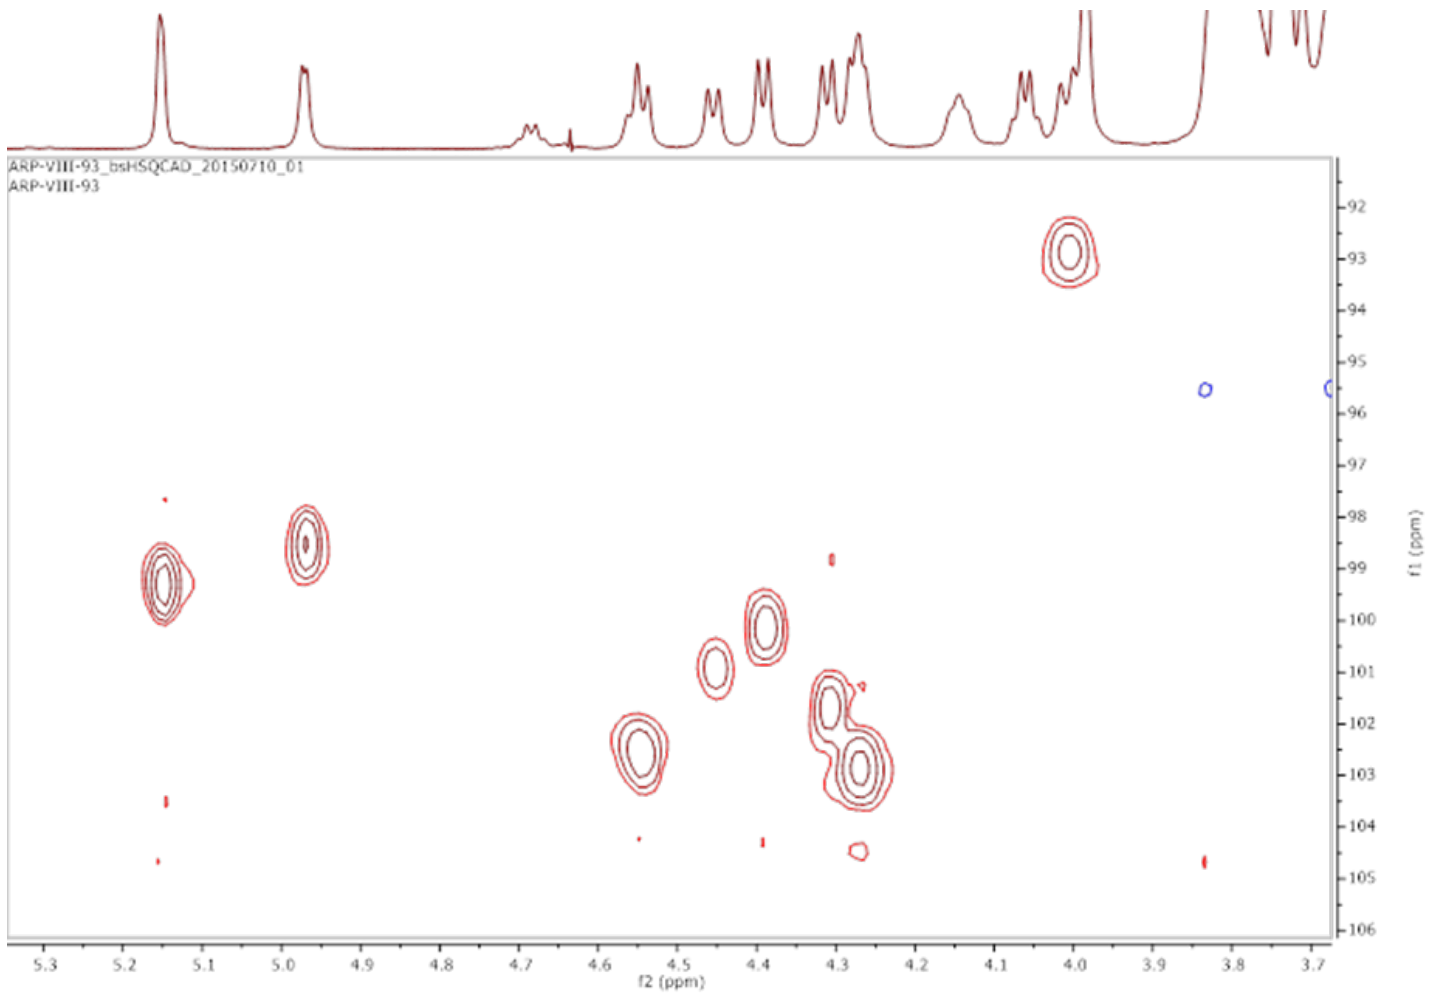

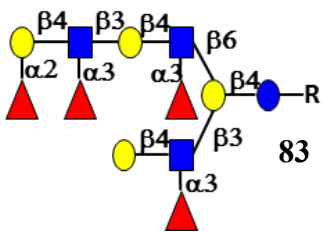

$^1\text{H}$  (600 MHz,  $\text{D}_2\text{O}$ ):  $\delta$  (ppm)

|                     | H1                            | H2   | H3               | H4   | H5                 | H6  | $\text{CH}_3$                 | NHAc                   |
|---------------------|-------------------------------|------|------------------|------|--------------------|-----|-------------------------------|------------------------|
| Glc                 | 4.00<br>(d, $J = 8.1$ Hz, 1H) | 3.34 | 3.40             | 3.46 | n/a <sup>[a]</sup> | n/a | -                             | -                      |
| Gal                 | 4.25<br>(d, $J = 7.7$ Hz, 2H) | 3.41 | 3.51             | 3.96 | n/a                | n/a | -                             | -                      |
| GlcNAc              | 4.54<br>(d, $J = 7.4$ Hz, 1H) | 3.78 | n/a              | n/a  | n/a                | n/a | -                             | 1.91 - 1.81<br>(m, 9H) |
| Gal(2)              | 4.34<br>(d, $J = 7.0$ Hz, 1H) | 3.48 | n/a              | 3.68 | n/a                | n/a | -                             | -                      |
| GlcNAc(2)           | 4.45                          | 3.73 | n/a <sup>1</sup> | n/a  | n/a                | n/a | -                             | 1.91 - 1.81<br>(m, 9H) |
| Gal(3)              | 4.25<br>(d, $J = 7.7$ Hz, 2H) | 3.33 | 3.51             | 3.92 | n/a                | n/a | -                             | -                      |
| GlcNAc(3)           | 4.54                          | 3.78 | n/a              | n/a  | n/a                | n/a | -                             | 1.91 - 1.81<br>(m, 9H) |
| Gal(4)              | 4.30<br>(d, $J = 7.8$ Hz, 1H) | 3.33 | 3.49             | 3.73 | n/a                | n/a | -                             | -                      |
| Fuc(1)( $\alpha$ 3) | 4.96                          | 3.51 | 3.73             | 3.62 | 4.67               | -   | 1.00<br>(d, $J = 6.6$ Hz, 3H) | -                      |
| Fuc(2)( $\alpha$ 3) | 4.91                          | 3.50 | 3.71             | 3.60 | 4.64               | -   | 0.97<br>(d, $J = 6.2$ Hz, 3H) | -                      |
| Fuc(3)( $\alpha$ 3) | 4.96                          | 3.51 | 3.73             | 3.62 | 4.67               | -   | 1.00<br>(d, $J = 6.1$ Hz, 3H) | -                      |
| Fuc(4)( $\alpha$ 2) | 5.11                          | 3.62 | n/a              | n/a  | 4.71               | -   | 1.06<br>(d, $J = 6.2$ Hz, 3H) | -                      |

$^{13}\text{C}$  from BSHSQC (150 MHz,  $\text{D}_2\text{O}$ ):  $\delta$  (ppm)

|                     | C1     |
|---------------------|--------|
| Glc                 | 92.80  |
| Gal                 | n/a    |
| GlcNAc              | n/a    |
| Gal(2)              | 100.12 |
| GlcNAc(2)           | n/a    |
| Gal(3)              | n/a    |
| GlcNAc(3)           | n/a    |
| Gal(4)              | n/a    |
| Fuc(1)( $\alpha$ 3) | 98.53  |
| Fuc(2)( $\alpha$ 3) | 98.64  |
| Fuc(3)( $\alpha$ 3) | 98.53  |
| Fuc(4)( $\alpha$ 2) | 99.44  |

<sup>[a]</sup> Not assigned

<sup>[b]</sup> Not applicable

MALDI TOF-MS  $m/z$  calcd  $\text{C}_{99}\text{H}_{159}\text{N}_7\text{O}_{62}\text{Na}^-$  ( $\text{M} + \text{Na}$ )<sup>+</sup> exact 2460.9402, found 2460.7825.

ARP-IX-2\_PRESAT\_20150807\_03  
ARP-IX-2

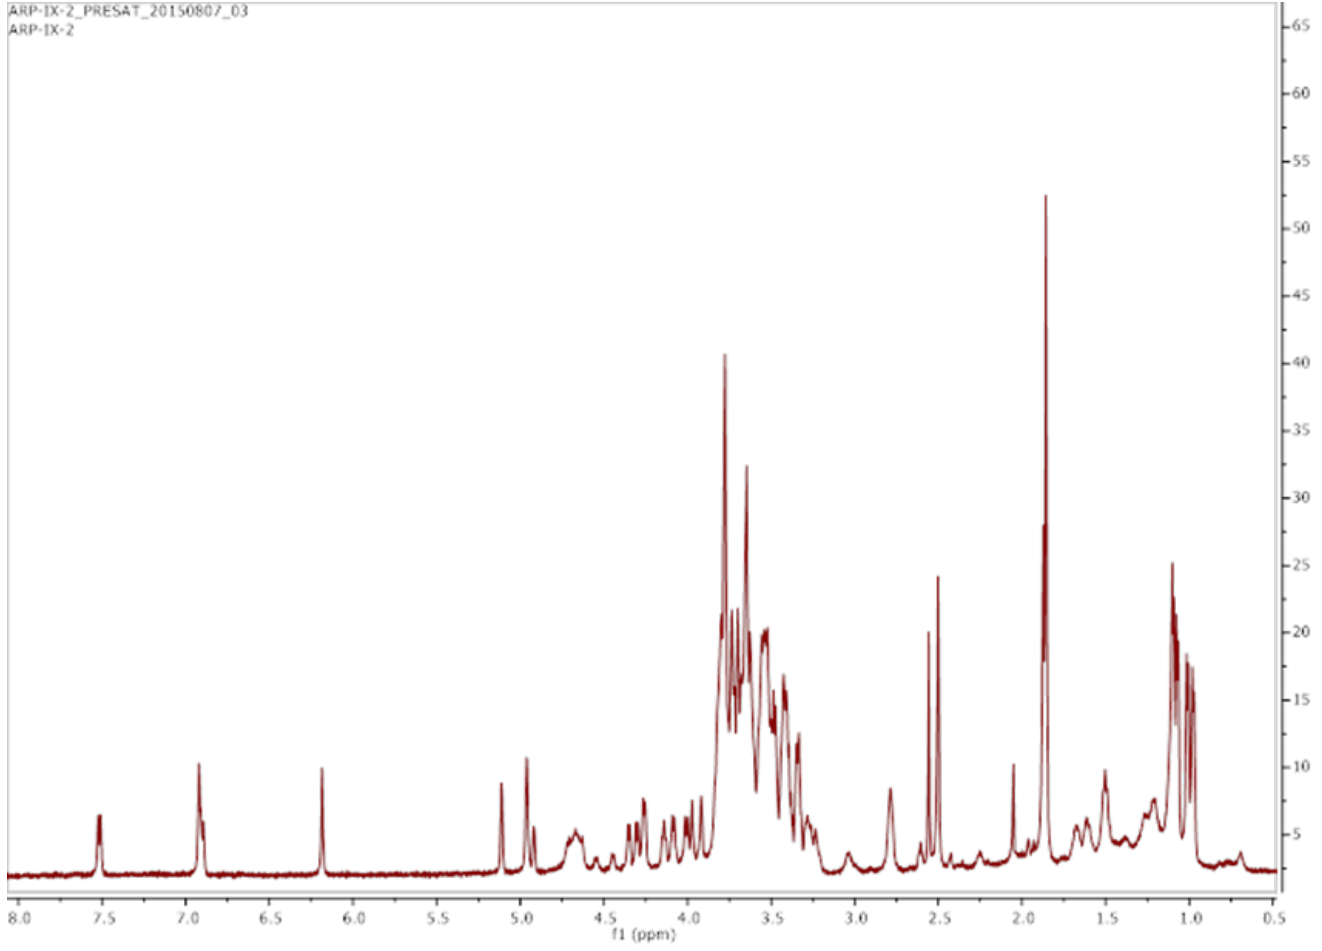



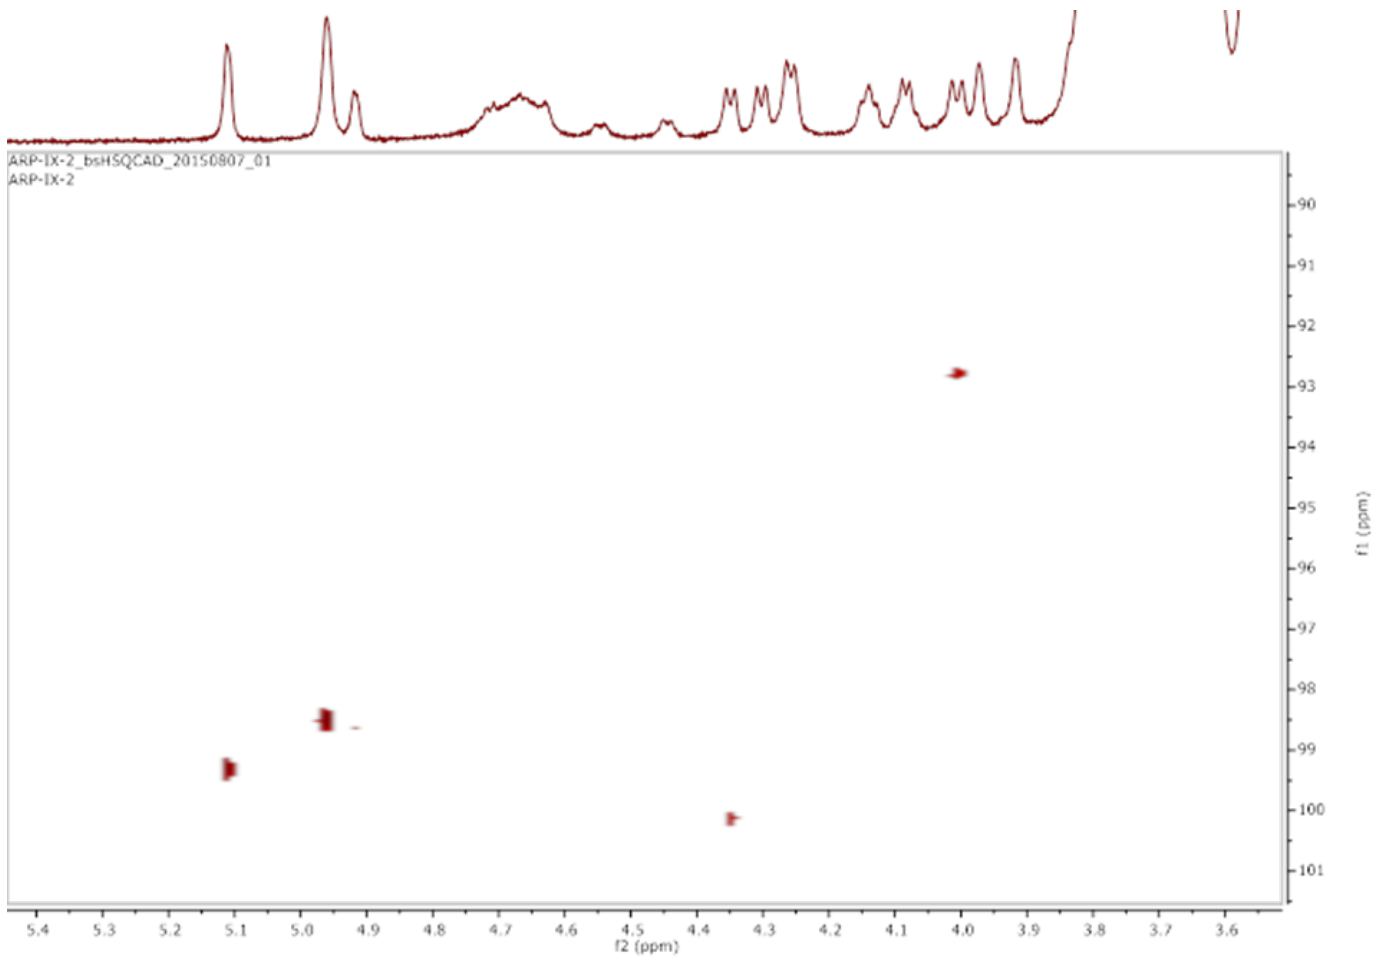

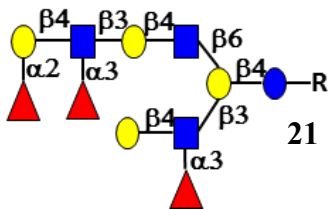

$^1\text{H}$  (800 MHz,  $\text{D}_2\text{O}$ ):  $\delta$  (ppm)

|                                     | H1                            | H2   | H3   | H4   | H5                                 | H6  | $\text{CH}_3$                 | NHAc                   |
|-------------------------------------|-------------------------------|------|------|------|------------------------------------|-----|-------------------------------|------------------------|
| <b>Glc</b>                          | 4.00<br>(d, $J = 8.8$ Hz, 1H) | 3.33 | 3.42 | 3.48 | n/a <sup>[a]</sup>                 | n/a | -                             | -                      |
| <b>Gal</b>                          | 4.27                          | 3.41 | 3.54 | 3.98 | n/a                                | n/a | -                             | -                      |
| <b>GlcNAc</b>                       | 4.56                          | 3.79 | 3.73 | 3.43 | n/a                                | n/a | -                             | 1.91 - 1.81<br>(m, 9H) |
| <b>Gal(2)</b>                       | 4.30<br>(d, $J = 7.6$ Hz, 1H) | 3.34 | 3.50 | 3.72 | n/a                                | n/a | -                             | -                      |
| <b>GlcNAc(2)</b>                    | 4.44<br>(d, $J = 8.3$ Hz, 1H) | 3.57 | 3.52 | 3.43 | n/a                                | n/a | -                             | 1.91 - 1.81<br>(m, 9H) |
| <b>Gal(3)</b>                       | 4.27                          | 3.41 | 3.54 | 3.98 | n/a                                | n/a | -                             | -                      |
| <b>GlcNAc(3)</b>                    | 4.56                          | 3.79 | 3.72 | 3.49 | n/a                                | n/a | -                             | 1.91 - 1.81<br>(m, 9H) |
| <b>Gal(4)</b>                       | 4.34<br>(d, $J = 7.8$ Hz, 1H) | 3.49 | n/a  | 3.70 | n/a                                | n/a | -                             | -                      |
| <b>Fuc(1)(<math>\alpha</math>3)</b> | 4.95                          | 3.53 | 3.76 | 3.65 | 4.68<br>(q, $J = 7.9, 6.9$ Hz, 1H) | -   | 1.01<br>(d, $J = 6.5$ Hz, 3H) | -                      |
| <b>Fuc(2)(<math>\alpha</math>3)</b> | 4.95                          | 3.53 | 3.76 | 3.65 | 4.77<br>(q, $J = 5.7, 5.1$ Hz, 1H) | -   | 1.07<br>(d, $J = 6.5$ Hz, 3H) | -                      |
| <b>Fuc(3)(<math>\alpha</math>2)</b> | 5.11<br>(d, $J = 3.4$ Hz, 1H) | 3.63 | n/a  | n/a  | 4.06<br>(q, $J = 6.6, 5.9$ Hz, 1H) | -   | 1.09<br>(d, $J = 6.5$ Hz, 3H) | -                      |

$^{13}\text{C}$  from BSHSQC (200 MHz,  $\text{D}_2\text{O}$ ):  $\delta$  (ppm)

|                                     | C1     |
|-------------------------------------|--------|
| <b>Glc</b>                          | 92.86  |
| <b>Gal</b>                          | 102.82 |
| <b>GlcNAc</b>                       | 102.53 |
| <b>Gal(2)</b>                       | 101.71 |
| <b>GlcNAc(2)</b>                    | 100.88 |
| <b>Gal(3)</b>                       | 102.82 |
| <b>GlcNAc(3)</b>                    | 102.53 |
| <b>Gal(4)</b>                       | 100.06 |
| <b>Fuc(1)(<math>\alpha</math>3)</b> | 98.55  |
| <b>Fuc(2)(<math>\alpha</math>3)</b> | 98.55  |
| <b>Fuc(3)(<math>\alpha</math>2)</b> | 99.33  |

<sup>[a]</sup> Not assigned

<sup>[b]</sup> Not applicable

MALDI TOF-MS  $m/z$  calcd  $\text{C}_{93}\text{H}_{149}\text{N}_7\text{O}_{58}\text{Na}^-$  ( $\text{M} + \text{Na}$ )<sup>+</sup> exact 2314.8823, found 2314.9739.

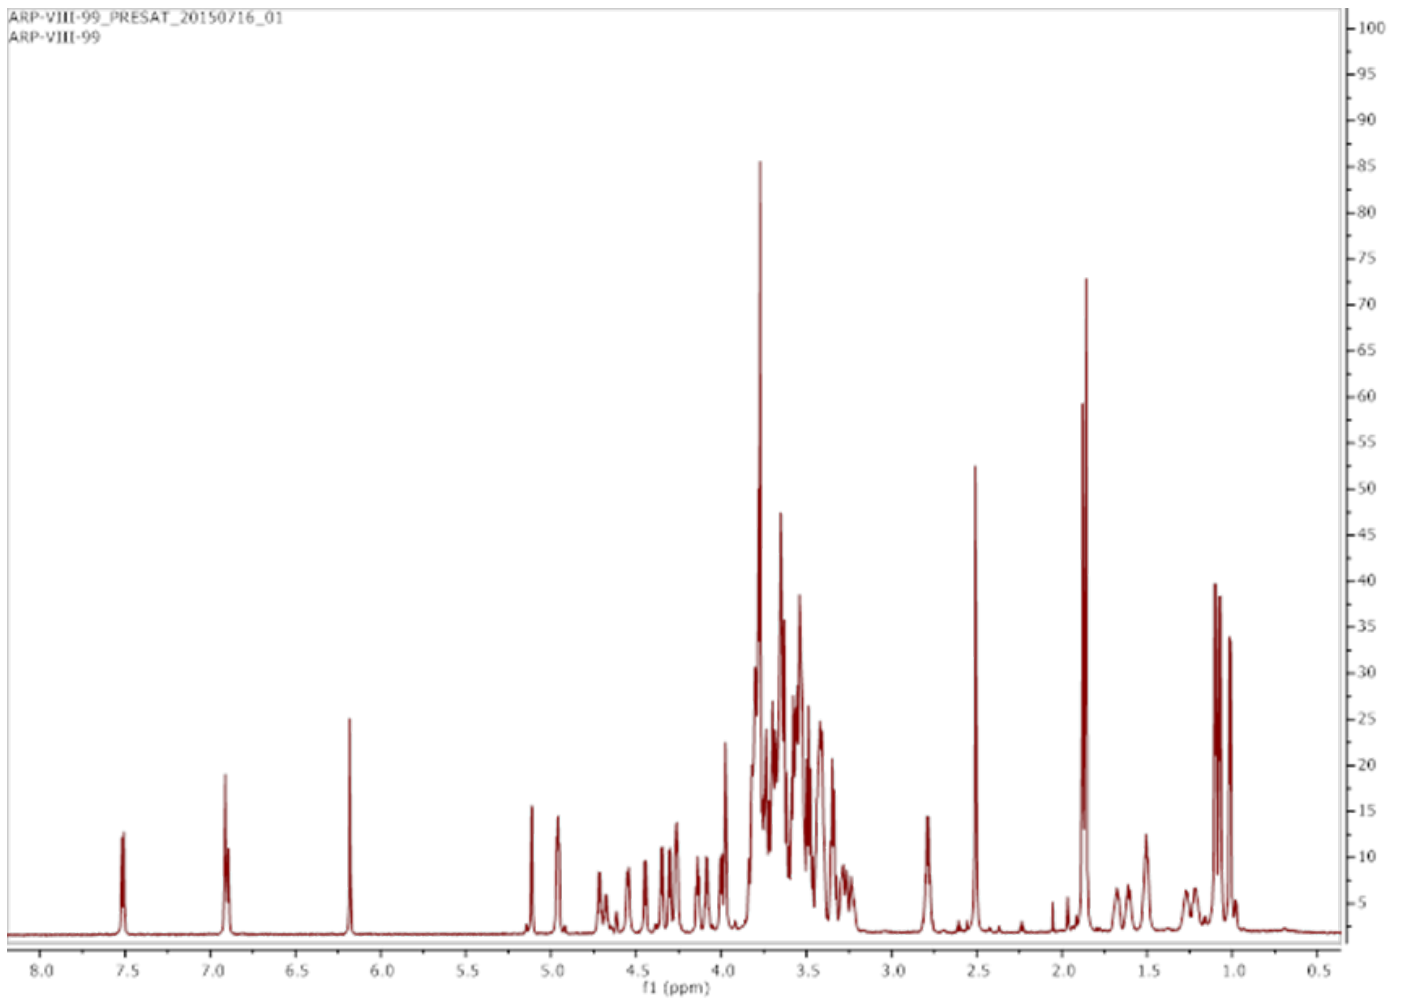

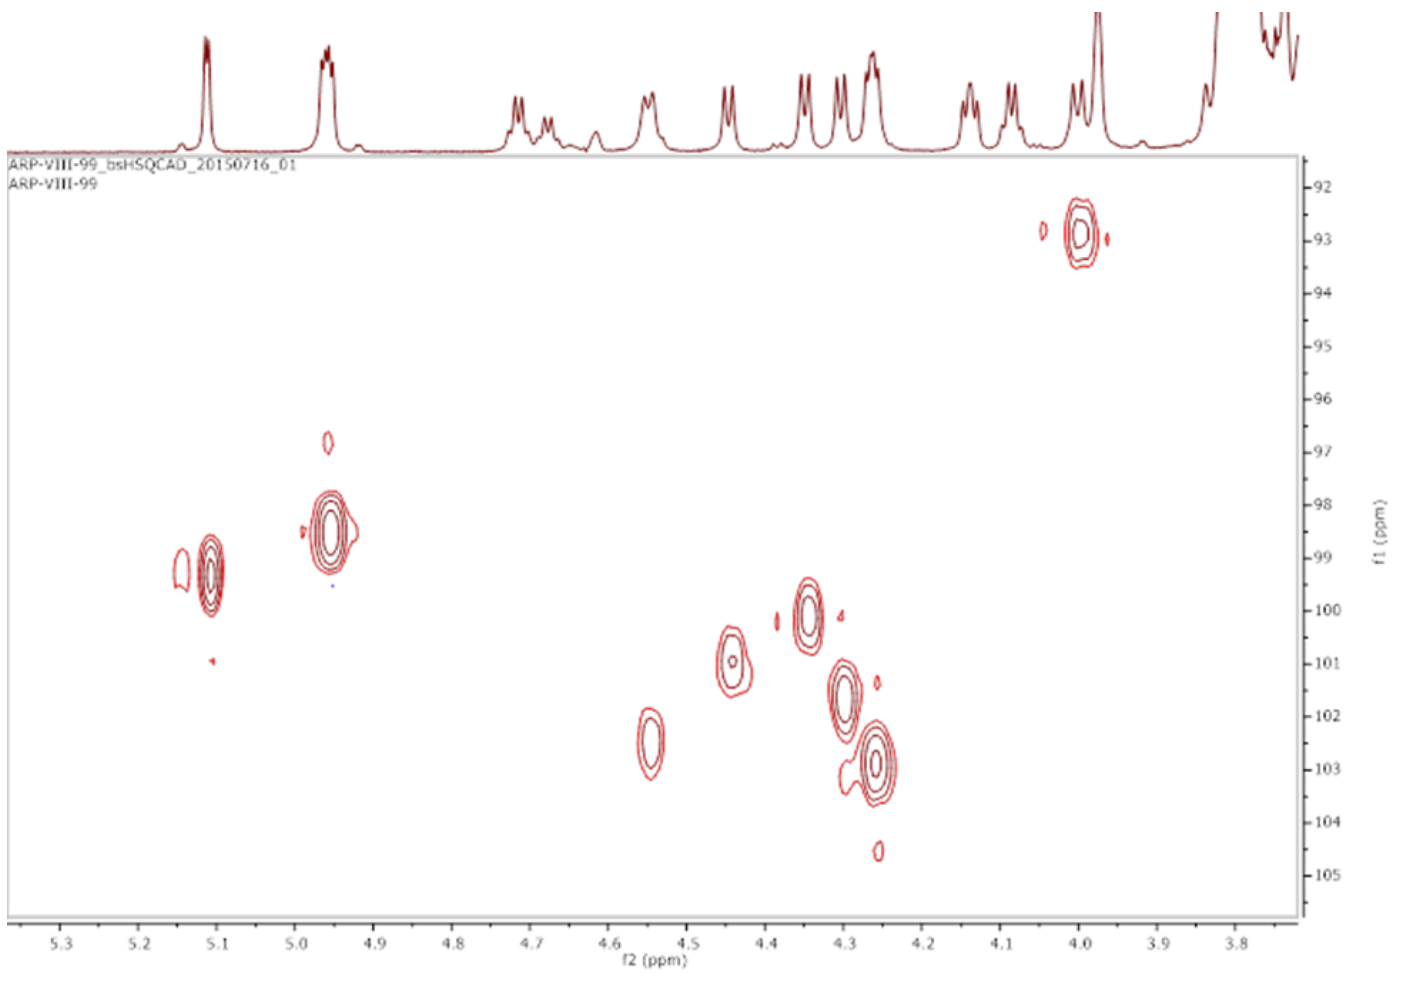

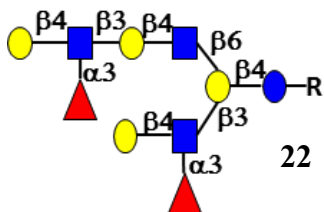

$^1\text{H}$  (800 MHz,  $\text{D}_2\text{O}$ ):  $\delta$  (ppm)

|                     | H1                            | H2   | H3   | H4   | H5                            | H6  | $\text{CH}_3$                 | NHAc                   |
|---------------------|-------------------------------|------|------|------|-------------------------------|-----|-------------------------------|------------------------|
| Glc                 | 4.00<br>(d, $J = 8.1$ Hz, 1H) | 3.34 | 3.40 | 3.46 | n/a <sup>[a]</sup>            | n/a | -                             | -                      |
| Gal                 | 4.25                          | 3.41 | 3.51 | 3.98 | n/a                           | n/a | -                             | -                      |
| GlcNAc              | 4.54<br>(d, $J = 7.4$ Hz, 2H) | 3.78 | 3.71 | 3.40 | n/a                           | n/a | -                             | 1.91 - 1.81<br>(m, 9H) |
| Gal(2)              | 4.30<br>(d, $J = 8.3$ Hz, 2H) | 3.32 | 3.48 | 3.72 | n/a                           | n/a | -                             | -                      |
| GlcNAc(2)           | 4.45<br>(d, $J = 8.3$ Hz, 1H) | 3.57 | 3.50 | 3.41 | n/a                           | n/a | -                             | 1.91 - 1.81<br>(m, 9H) |
| Gal(3)              | 4.25                          | 3.41 | 3.51 | 3.98 | n/a                           | n/a | -                             | -                      |
| GlcNAc(3)           | 4.54<br>(d, $J = 7.4$ Hz, 2H) | 3.78 | 3.71 | 3.40 | n/a                           | n/a | -                             | 1.91 - 1.81<br>(m, 9H) |
| Gal(4)              | 4.30<br>(d, $J = 8.3$ Hz, 2H) | 3.32 | 3.48 | 3.72 | n/a                           | n/a | -                             | -                      |
| Fuc(1)( $\alpha$ 3) | 4.96<br>(d, $J = 3.9$ Hz, 2H) | 3.51 | 3.73 | 3.62 | 4.67<br>(q, $J = 6.9$ Hz, 2H) | -   | 1.01<br>(d, $J = 6.5$ Hz, 6H) | -                      |
| Fuc(2)( $\alpha$ 3) | 4.96<br>(d, $J = 3.9$ Hz, 2H) | 3.51 | 3.73 | 3.62 | 4.67<br>(q, $J = 6.9$ Hz, 2H) | -   | 1.01<br>(d, $J = 6.5$ Hz, 6H) | -                      |

$^{13}\text{C}$  from BSHSQC (200 MHz,  $\text{D}_2\text{O}$ ):  $\delta$  (ppm)

|                     | C1     |
|---------------------|--------|
| Glc                 | 92.83  |
| Gal                 | 103.08 |
| GlcNAc              | 102.50 |
| Gal(2)              | 101.62 |
| GlcNAc(2)           | 101.00 |
| Gal(3)              | 103.08 |
| GlcNAc(3)           | 102.50 |
| Gal(4)              | 101.62 |
| Fuc(1)( $\alpha$ 3) | 98.54  |
| Fuc(2)( $\alpha$ 3) | 98.54  |

<sup>[a]</sup> Not assigned

<sup>[b]</sup> Not applicable

MALDI TOF-MS  $m/z$  calcd  $\text{C}_{87}\text{H}_{139}\text{N}_7\text{O}_{54}\text{Na}^-$  ( $\text{M} + \text{Na}$ )<sup>+</sup> exact 2168.8244, found 2168.4053.

ARP-IX-3\_PRESAT\_20150801\_02  
ARP-IX-3

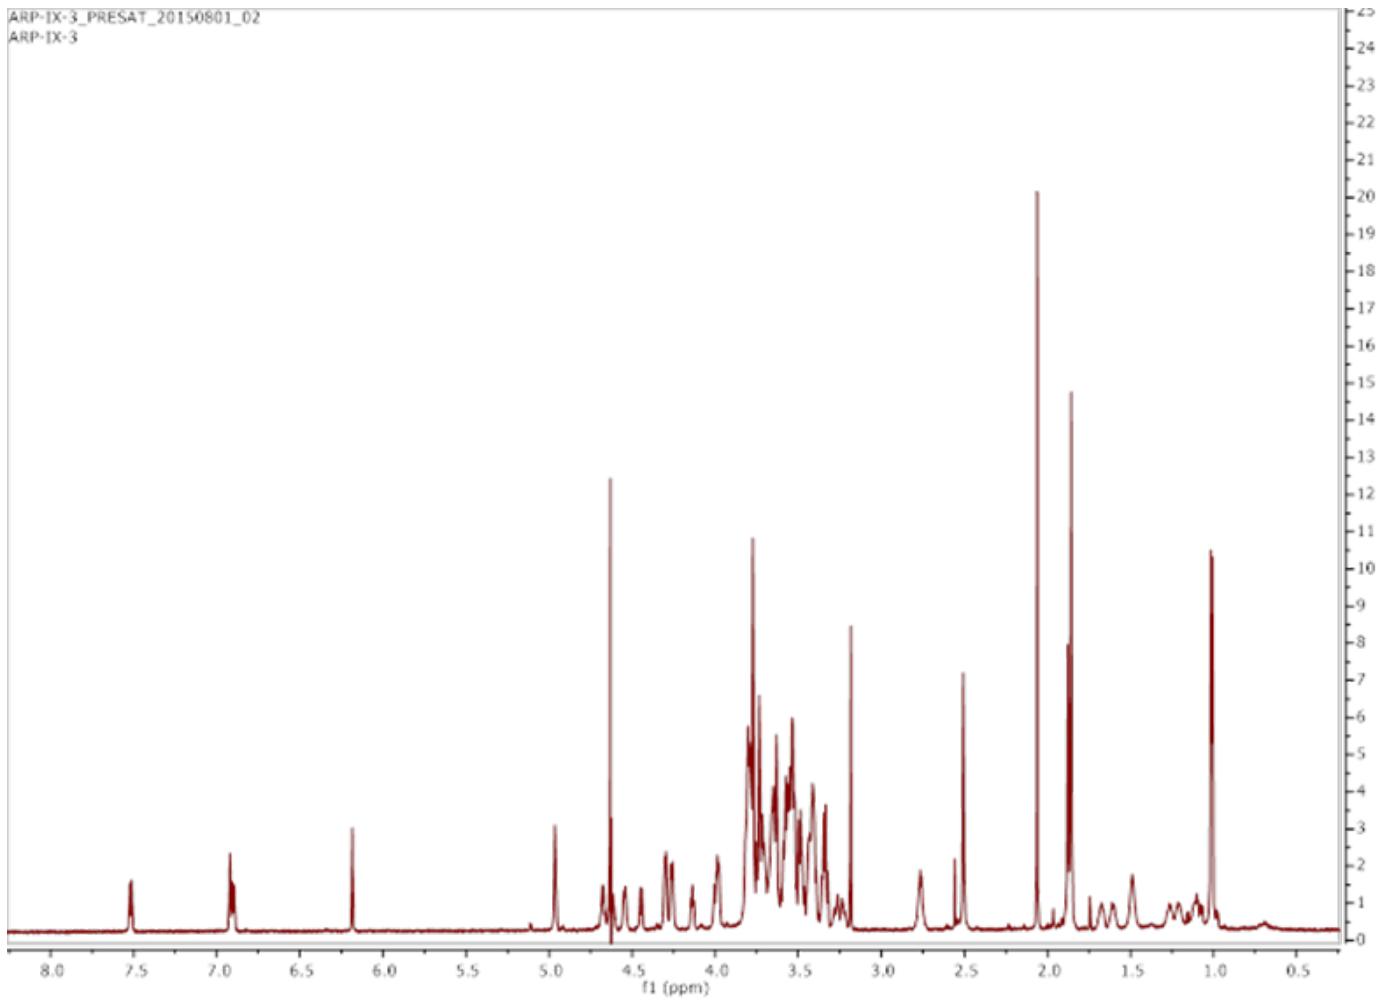

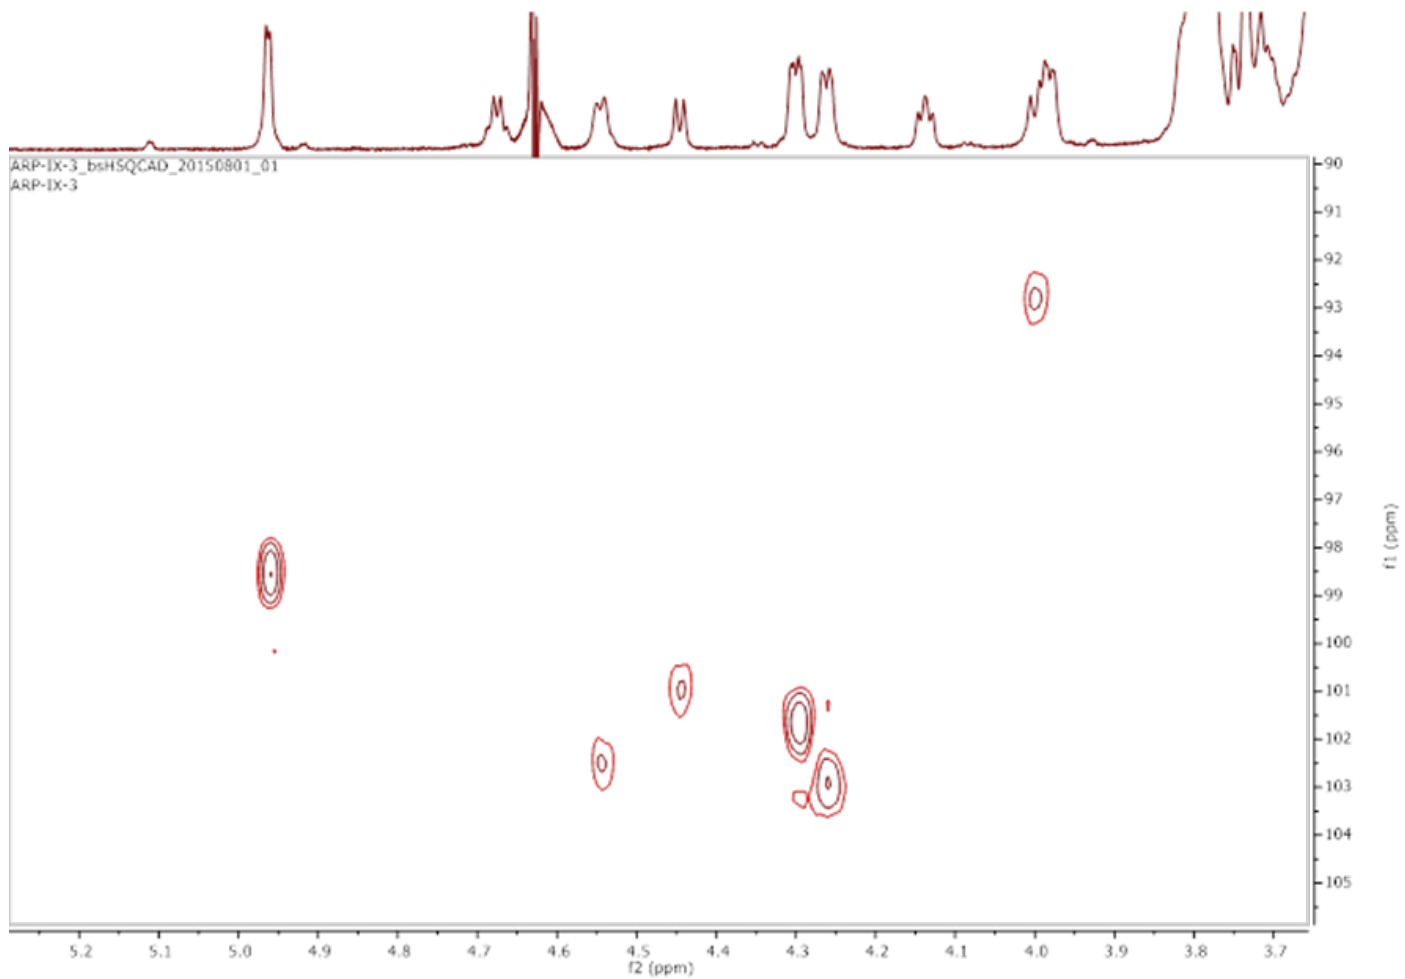

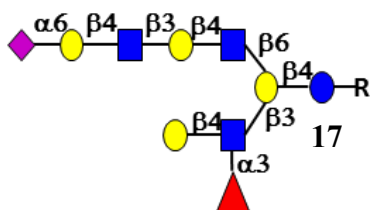

$^1\text{H}$  (800 MHz,  $\text{D}_2\text{O}$ ):  $\delta$  (ppm)

|                                     | H1                            | H2   | H3                                                   | H4   | H5                 | H6   | H7  | H8  | H9  | $\text{CH}_3$                 | NHAc                    |
|-------------------------------------|-------------------------------|------|------------------------------------------------------|------|--------------------|------|-----|-----|-----|-------------------------------|-------------------------|
| <b>Glc</b>                          | 4.00                          | 3.36 | 3.42                                                 | 3.48 | n/a <sup>[a]</sup> | n/a  | -   | -   | -   | -                             | -                       |
| <b>Gal</b>                          | 4.26                          | 3.42 | 3.54                                                 | 3.99 | n/a                | n/a  | -   | -   | -   | -                             | -                       |
| <b>GlcNAc</b>                       | 4.55                          | 3.80 | 3.73                                                 | 3.42 | n/a                | n/a  | -   | -   | -   | -                             | 1.91 - 1.81<br>(m, 12H) |
| <b>Gal(2)</b>                       | 4.30                          | 3.33 | 3.50                                                 | 3.74 | n/a                | n/a  | -   | -   | -   | -                             | -                       |
| <b>GlcNAc(2)</b>                    | 4.44<br>(d, $J = 8.3$ Hz, 1H) | 3.58 | 3.52                                                 | 3.43 | n/a                | n/a  | -   | -   | -   | -                             | 1.91 - 1.81<br>(m, 12H) |
| <b>Gal(3)</b>                       | 4.26                          | 3.42 | 3.54                                                 | 3.99 | n/a                | n/a  | -   | -   | -   | -                             | -                       |
| <b>GlcNAc(3)</b>                    | 4.55                          | 3.64 | 3.50                                                 | 3.44 | n/a                | n/a  | -   | -   | -   | -                             | 1.91 - 1.81<br>(m, 12H) |
| <b>Gal(4)</b>                       | 4.29                          | 3.38 | 3.51                                                 | 3.77 | n/a                | n/a  | -   | -   | -   | -                             | -                       |
| <b>Fuc(1)(<math>\alpha</math>3)</b> | 4.96<br>(d, $J = 3.9$ Hz, 1H) | 3.53 | 3.75                                                 | 3.64 | 4.68               | -    | -   | -   | -   | 1.02<br>(d, $J = 6.6$ Hz, 3H) | -                       |
| <b>Neu5Ac</b>                       | -                             | -    | 2.51 – eq<br>1.56 – axial<br>(dd, $J = 12.2$ Hz, 1H) | 3.49 | 3.62               | 3.51 | n/a | n/a | n/a | n/a                           | 1.91 - 1.81<br>(m, 12H) |

$^{13}\text{C}$  from BSHSQC (200 MHz,  $\text{D}_2\text{O}$ ):  $\delta$  (ppm)

|                                     | C1     |
|-------------------------------------|--------|
| <b>Glc</b>                          | 92.86  |
| <b>Gal</b>                          | 102.97 |
| <b>GlcNAc</b>                       | 102.58 |
| <b>Gal(2)</b>                       | 101.51 |
| <b>GlcNAc(2)</b>                    | 101.02 |
| <b>Gal(3)</b>                       | 102.97 |
| <b>GlcNAc(3)</b>                    | 102.58 |
| <b>Gal(4)</b>                       | 103.22 |
| <b>Fuc(1)(<math>\alpha</math>3)</b> | 98.62  |

<sup>[a]</sup> Not assigned

<sup>[b]</sup> Not applicable

MALDI TOF-MS  $m/z$  calcd  $\text{C}_{92}\text{H}_{145}\text{N}_8\text{O}_{58}\text{Na}_2^-$  ( $\text{M} + 2\text{Na}$ )<sup>+</sup> exact 2335.8444, found 2334.8179.



ARP-VIII-94\_PRESAT\_20150711\_01  
ARP-VIII-94

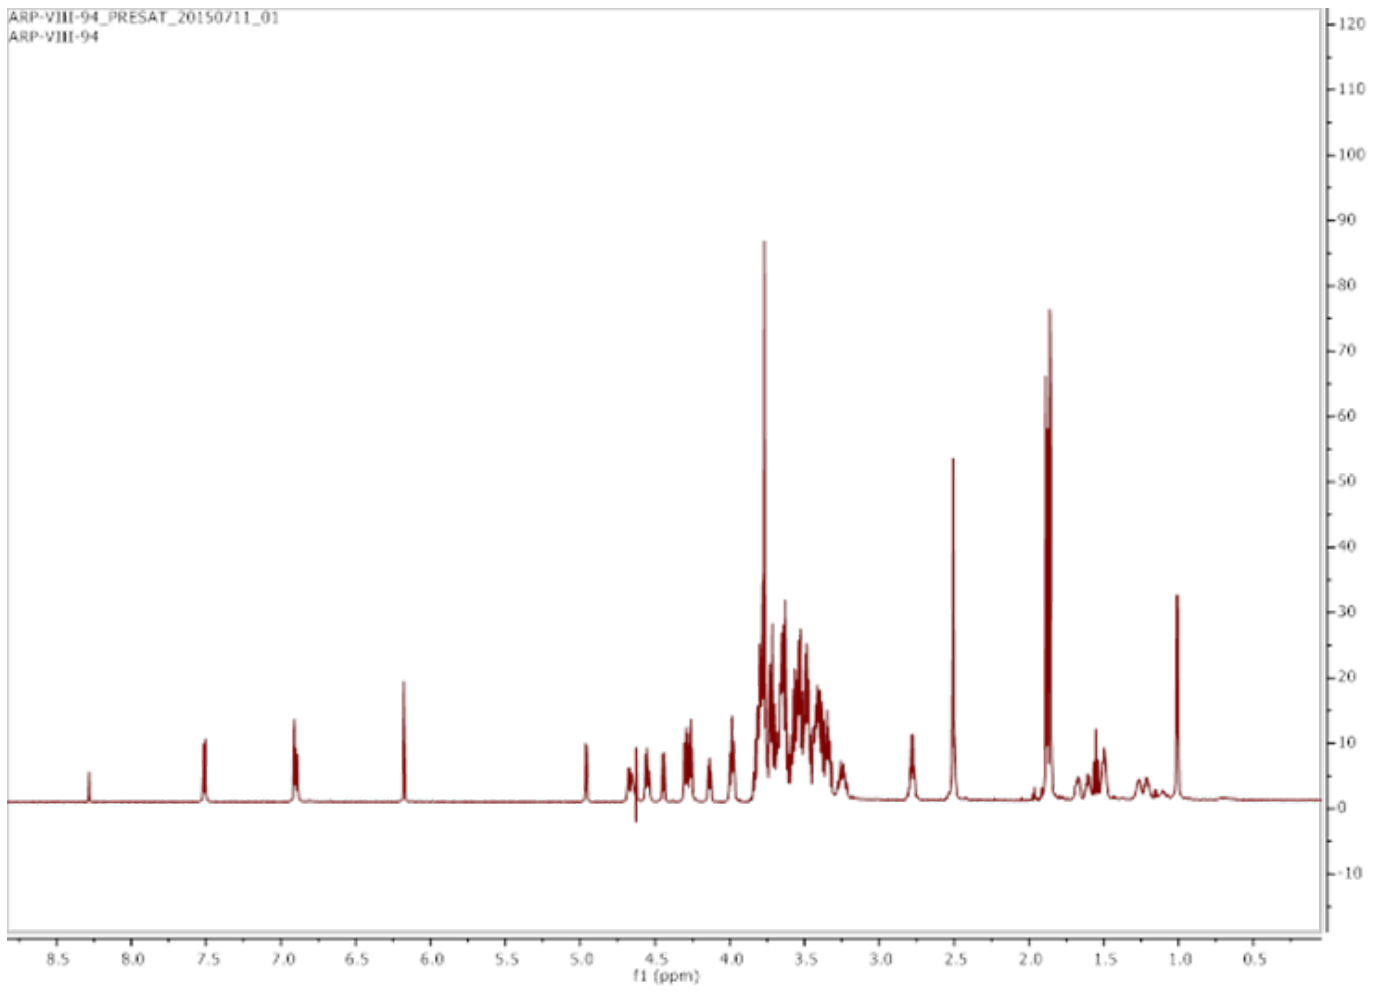

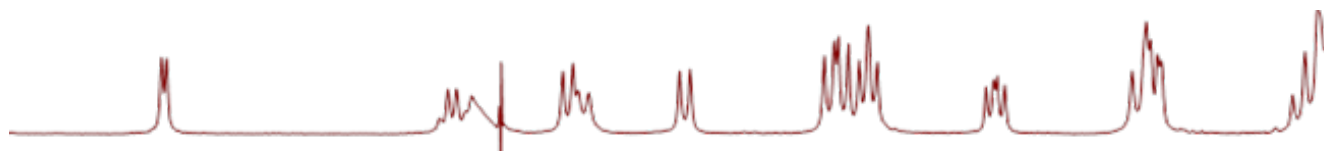

ARP-VIII-94\_bsHSQCAD\_20150711\_01  
ARP-VIII-94

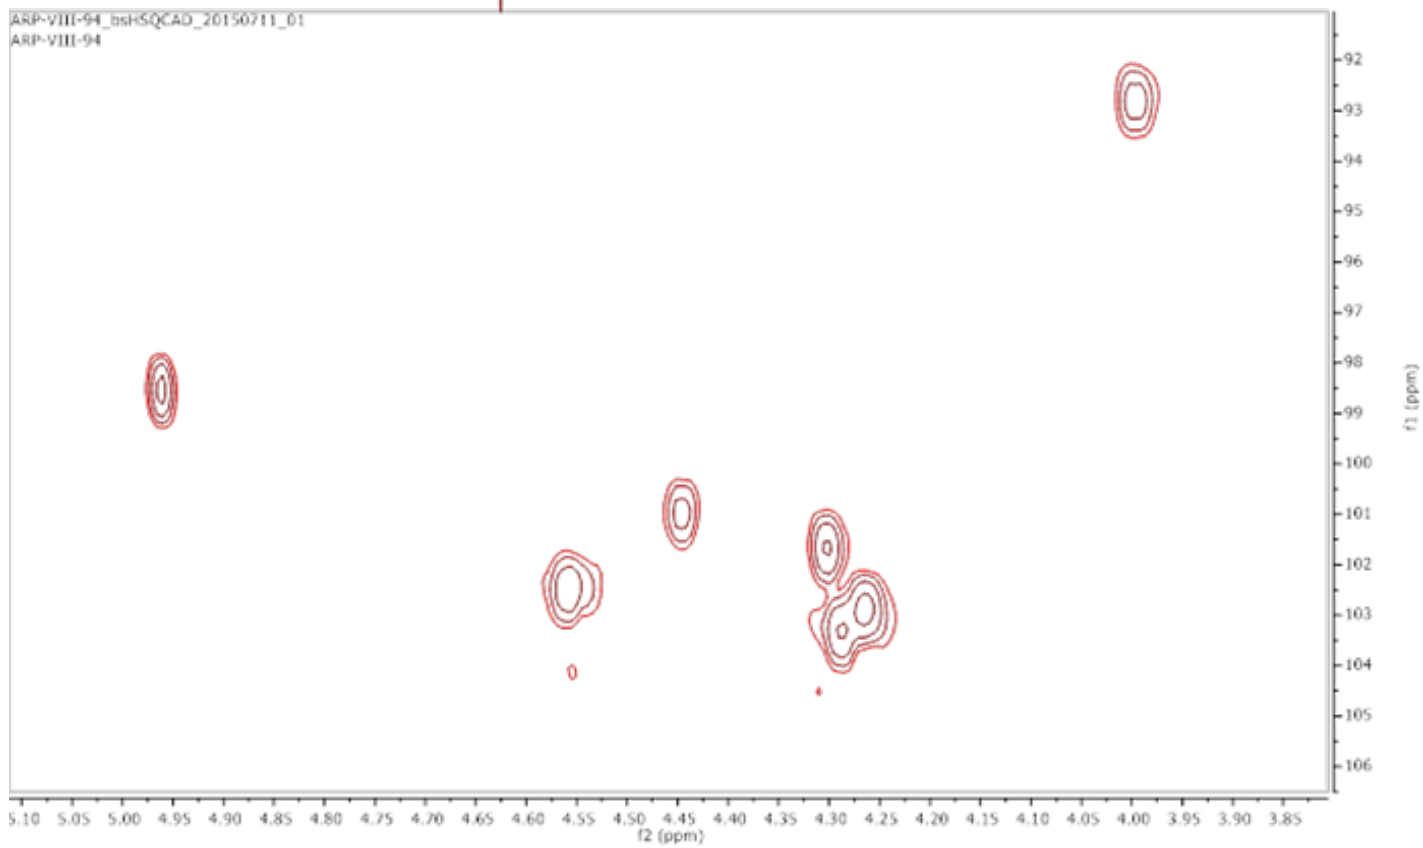

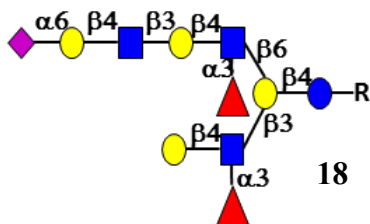

$^1\text{H}$  (600 MHz,  $\text{D}_2\text{O}$ ):  $\delta$  (ppm)

|                      | H1                            | H2   | H3                        | H4   | H5                 | H6   | H7  | H8  | H9  | $\text{CH}_3$                 | NHAc                    |
|----------------------|-------------------------------|------|---------------------------|------|--------------------|------|-----|-----|-----|-------------------------------|-------------------------|
| Glc                  | 4.00<br>(d, $J = 9.2$ Hz, 1H) | 3.35 | 3.41                      | 3.48 | n/a <sup>[a]</sup> | n/a  | -   | -   | -   | -                             | -                       |
| Gal                  | 4.27                          | 3.36 | 3.54                      | 3.94 | n/a                | n/a  | -   | -   | -   | -                             | -                       |
| GlcNAc               | 4.56                          | 3.80 | 3.73                      | n/a  | n/a                | n/a  | -   | -   | -   | -                             | 1.91 - 1.81<br>(m, 12H) |
| Gal(2)               | 4.31                          | 3.33 | 3.51                      | 3.74 | n/a                | n/a  | -   | -   | -   | -                             | -                       |
| GlcNAc(2)            | 4.44<br>(d, $J = 8.0$ Hz, 1H) | 3.75 | n/a                       | 3.43 | n/a                | n/a  | -   | -   | -   | -                             | 1.91 - 1.81<br>(m, 12H) |
| Gal(3)               | 4.26                          | 3.42 | 3.54                      | 3.91 | n/a                | n/a  | -   | -   | -   | -                             | -                       |
| GlcNAc(3)            | 4.56                          | 3.64 | 3.51                      | n/a  | n/a                | n/a  | -   | -   | -   | -                             | 1.91 - 1.81<br>(m, 12H) |
| Gal(4)               | 4.29                          | 3.38 | 3.52                      | 3.77 | n/a                | n/a  | -   | -   | -   | -                             | -                       |
| Fuc(1)( $\alpha 3$ ) | 4.97<br>(d, $J = 3.8$ Hz, 1H) | 3.53 | 3.75                      | 3.64 | 4.69               | -    | -   | -   | -   | 1.02<br>(d, $J = 6.5$ Hz, 3H) | -                       |
| Fuc(2)( $\alpha 3$ ) | 4.93<br>(d, $J = 3.6$ Hz, 1H) | 3.53 | 3.73                      | 3.63 | 4.67               | -    | -   | -   | -   | 1.00<br>(d, $J = 6.5$ Hz, 3H) | -                       |
| Neu5Ac               | -                             | -    | 2.51 - eq<br>1.56 - axial | 3.49 | 3.62               | 3.51 | n/a | n/a | n/a | n/a                           | 1.91 - 1.81<br>(m, 12H) |

$^{13}\text{C}$  from BSHSQC (150 MHz,  $\text{D}_2\text{O}$ ):  $\delta$  (ppm)

|                      | C1     |
|----------------------|--------|
| Glc                  | 92.90  |
| Gal                  | 101.58 |
| GlcNAc               | 102.46 |
| Gal(2)               | 101.68 |
| GlcNAc(2)            | 100.77 |
| Gal(3)               | 103.03 |
| GlcNAc(3)            | 102.46 |
| Gal(4)               | 103.39 |
| Fuc(1)( $\alpha 3$ ) | 98.45  |
| Fuc(2)( $\alpha 3$ ) | 98.58  |

<sup>[a]</sup> Not assigned

<sup>[b]</sup> Not applicable

MALDI TOF-MS  $m/z$  calcd  $\text{C}_{98}\text{H}_{155}\text{N}_8\text{O}_{62}\text{Na}_2^{--}$  ( $\text{M} + 2\text{Na}$ )<sup>+</sup> exact 2481.9023, found 2482.3999.

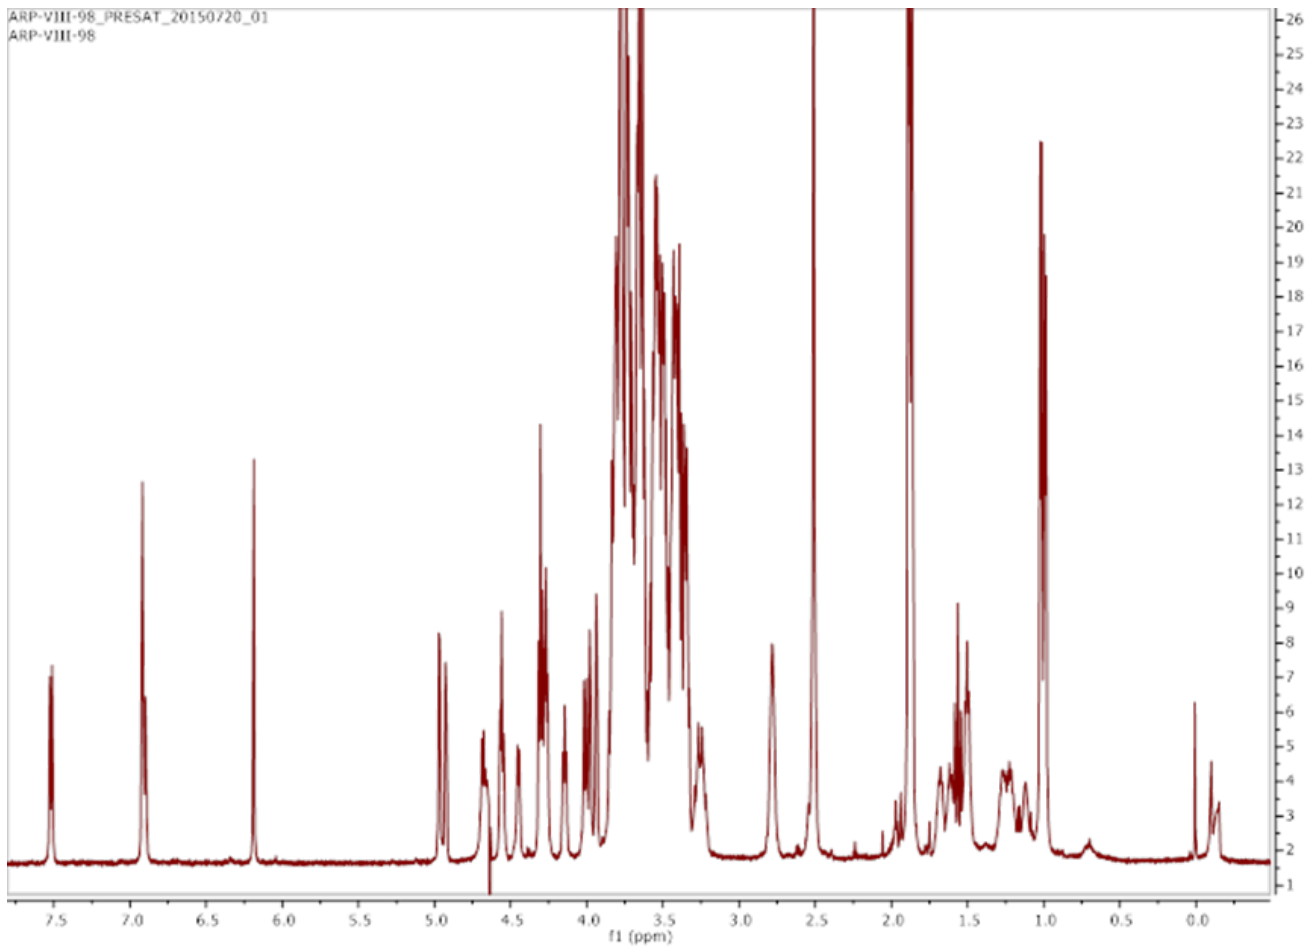

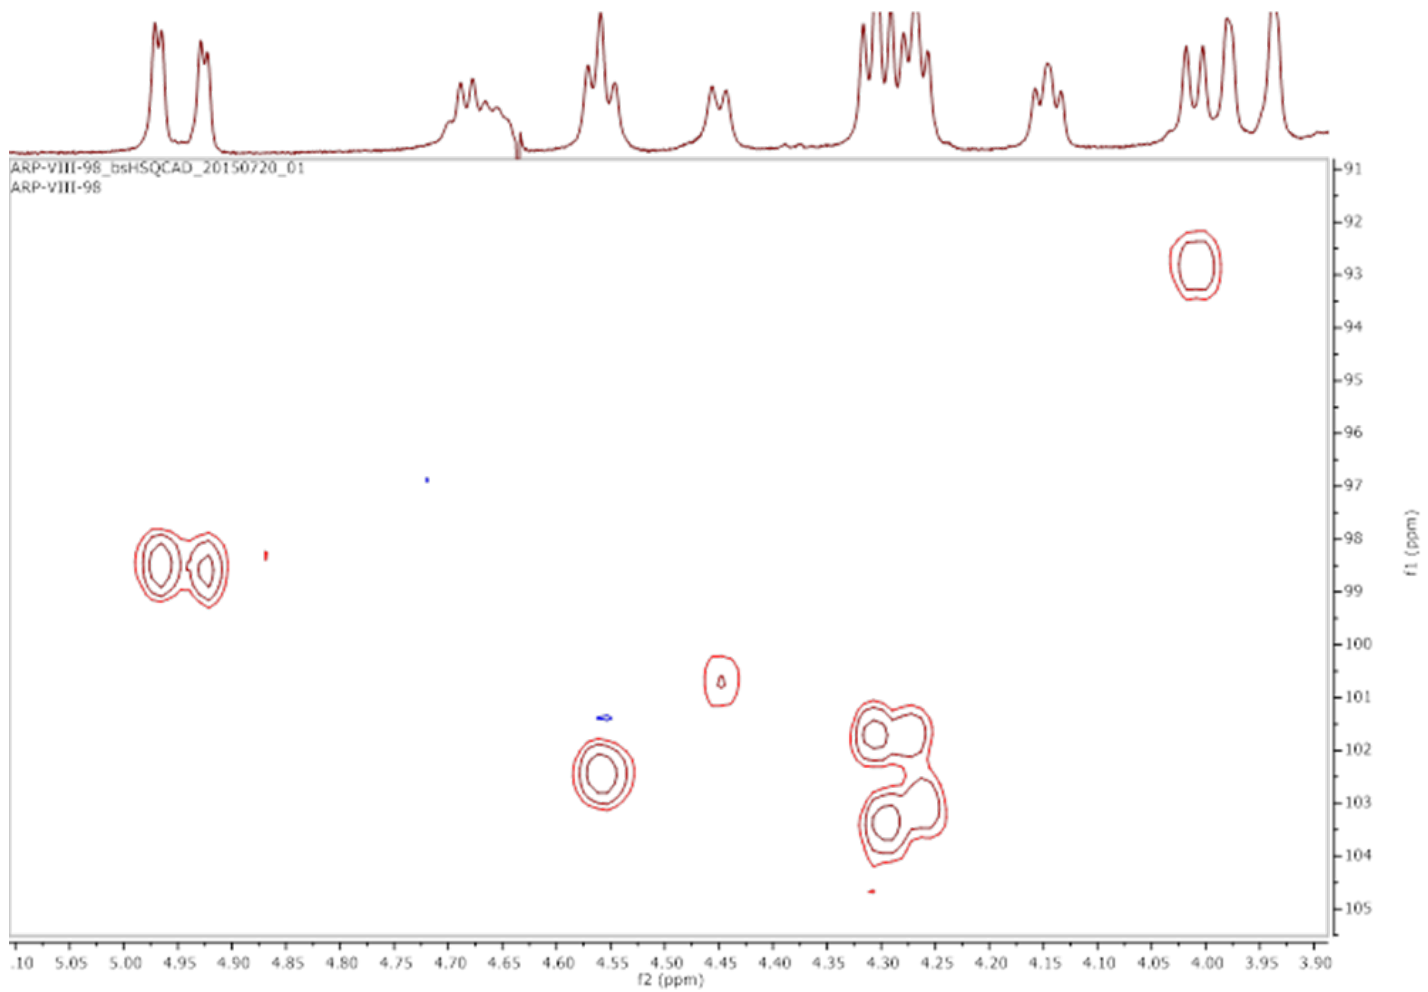

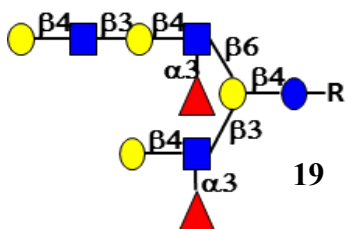

$^1\text{H}$  (800 MHz,  $\text{D}_2\text{O}$ ):  $\delta$  (ppm)

|                     | H1                            | H2   | H3   | H4   | H5                 | H6  | $\text{CH}_3$                 | NHAc                   |
|---------------------|-------------------------------|------|------|------|--------------------|-----|-------------------------------|------------------------|
| Glc                 | 4.00<br>(d, $J = 8.8$ Hz, 1H) | 3.33 | 3.39 | 3.44 | n/a <sup>[a]</sup> | n/a | -                             | -                      |
| Gal                 | 4.25                          | 3.41 | 3.54 | 3.98 | n/a                | n/a | -                             | -                      |
| GlcNAc              | 4.53                          | 3.79 | 3.71 | n/a  | n/a                | n/a | -                             | 1.91 - 1.81<br>(m, 9H) |
| Gal(2)              | 4.29                          | 3.34 | 3.48 | 3.73 | n/a                | n/a | -                             | -                      |
| GlcNAc(2)           | 4.44<br>(d, $J = 6.9$ Hz, 1H) | 3.73 | n/a  | 3.41 | n/a                | n/a | -                             | 1.91 - 1.81<br>(m, 9H) |
| Gal(3)              | 4.25                          | 3.34 | 3.52 | 3.92 | n/a                | n/a | -                             | -                      |
| GlcNAc(3)           | 4.53                          | 3.63 | 3.56 | 3.41 | n/a                | n/a | -                             | 1.91 - 1.81<br>(m, 9H) |
| Gal(4)              | 4.31                          | 3.37 | 3.49 | 3.76 | n/a                | n/a | -                             | -                      |
| Fuc(1)( $\alpha$ 3) | 4.95<br>(d, $J = 3.7$ Hz, 1H) | 3.53 | 3.73 | 3.62 | 4.66               | -   | 1.01<br>(d, $J = 6.4$ Hz, 3H) | -                      |
| Fuc(2)( $\alpha$ 3) | 4.91<br>(d, $J = 3.8$ Hz, 1H) | 3.51 | 3.71 | 3.59 | 4.63               | -   | 0.97<br>(d, $J = 6.3$ Hz, 3H) | -                      |

$^{13}\text{C}$  from BSHSQC (200 MHz,  $\text{D}_2\text{O}$ ):  $\delta$  (ppm)

|                     | C1     |
|---------------------|--------|
| Glc                 | 92.78  |
| Gal                 | 101.73 |
| GlcNAc              | 102.55 |
| Gal(2)              | 101.77 |
| GlcNAc(2)           | 100.80 |
| Gal(3)              | 102.89 |
| GlcNAc(3)           | 102.55 |
| Gal(4)              | 102.80 |
| Fuc(1)( $\alpha$ 3) | 98.53  |
| Fuc(2)( $\alpha$ 3) | 98.74  |

<sup>[a]</sup> Not assigned

<sup>[b]</sup> Not applicable

MALDI TOF-MS  $m/z$  calcd  $\text{C}_{87}\text{H}_{139}\text{N}_7\text{Na}_{54}\text{O}^-$  ( $\text{M} + \text{Na}$ )<sup>+</sup> exact 2168.8244, found 2169.5872.

ARP-IX-4\_PRESAT\_20150802\_02  
ARP-IX-4

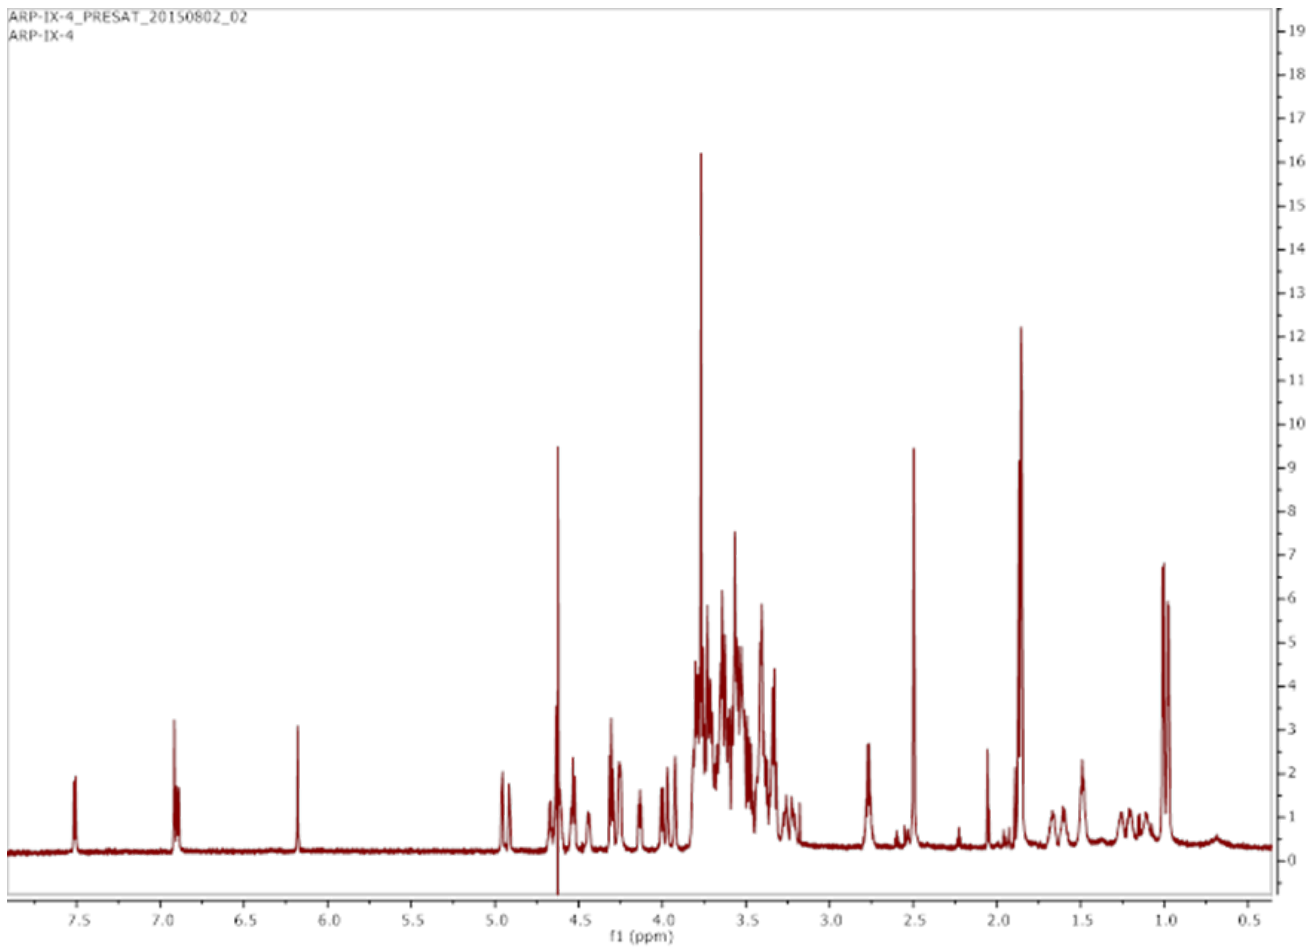

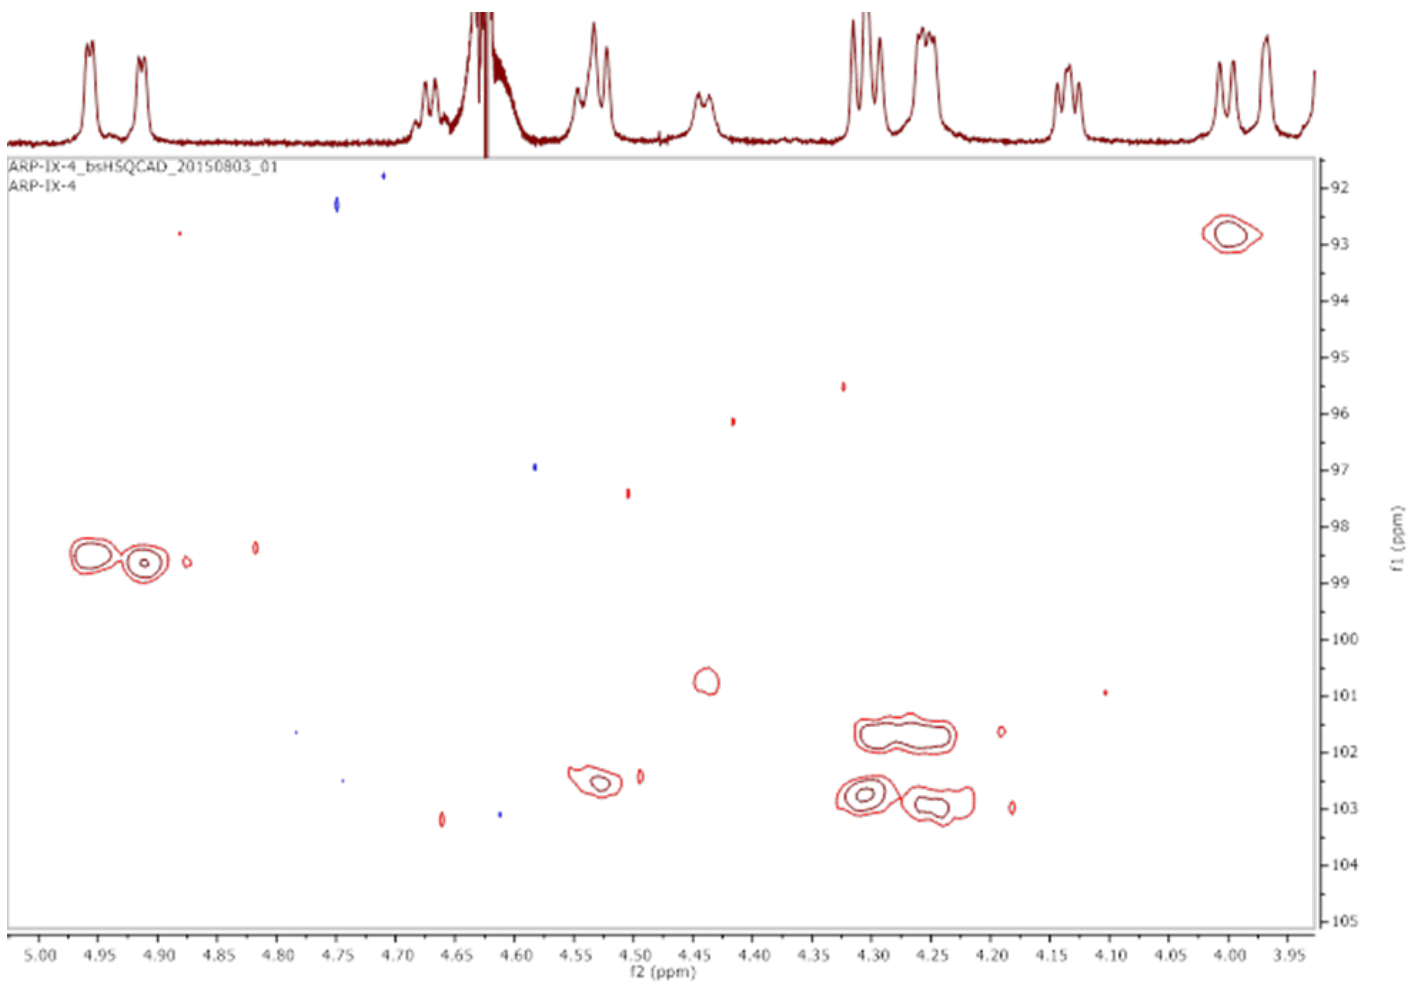



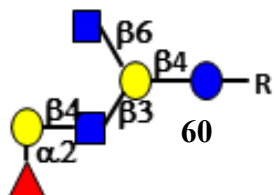

$^1\text{H}$  (800 MHz,  $\text{D}_2\text{O}$ ):  $\delta$  (ppm)

|                                      | H1                             | H2   | H3   | H4   | H5                               | H6  | $\text{CH}_3$                 | NHAc                   |
|--------------------------------------|--------------------------------|------|------|------|----------------------------------|-----|-------------------------------|------------------------|
| <b>Glc</b>                           | 4.00<br>(d, $J = 10.4$ Hz, 1H) | 3.34 | 3.40 | 3.47 | n/a <sup>[a]</sup>               | n/a | -                             | -                      |
| <b>Gal</b>                           | 4.26<br>(d, $J = 7.6$ Hz, 1H)  | 3.41 | 3.52 | 3.97 | n/a                              | n/a | -                             | -                      |
| <b>GlcNAc</b>                        | 4.53<br>(d, $J = 7.7$ Hz, 1H)  | 3.64 | 3.54 | 3.31 | n/a                              | n/a | -                             | 1.91 - 1.81<br>(m, 6H) |
| <b>Gal(2)</b>                        | 4.39<br>(d, $J = 8.2$ Hz, 1H)  | 3.51 | 3.63 | 3.72 | n/a                              | n/a | -                             | -                      |
| <b>GlcNAc(2)</b>                     | 4.42<br>(d, $J = 8.7$ Hz, 1H)  | 3.52 | 3.38 | 3.28 | n/a                              | n/a | -                             | 1.91 - 1.81<br>(m, 6H) |
| <b>Fuc(1)(<math>\alpha 2</math>)</b> | 5.14<br>(d, $J = 3.2$ Hz, 1H)  | 3.64 | n/a  | n/a  | 4.06<br>(br q, $J = 6.1$ Hz, 1H) | -   | 1.07<br>(d, $J = 5.8$ Hz, 3H) | -                      |

$^{13}\text{C}$  from BSHSQC (200 MHz,  $\text{D}_2\text{O}$ ):  $\delta$  (ppm)

|                                      | C1     |
|--------------------------------------|--------|
| <b>Glc</b>                           | 92.85  |
| <b>Gal</b>                           | 102.94 |
| <b>GlcNAc</b>                        | 102.66 |
| <b>Gal(2)</b>                        | 100.21 |
| <b>GlcNAc(2)</b>                     | 101.07 |
| <b>Fuc(1)(<math>\alpha 2</math>)</b> | 99.35  |

<sup>[a]</sup> Not assigned

<sup>[b]</sup> Not applicable

MALDI TOF-MS  $m/z$  calcd  $\text{C}_{61}\text{H}_{96}\text{N}_6\text{O}_{35}\text{Na}^-$  ( $\text{M} + \text{Na}$ )<sup>+</sup> exact 1495.5814, found 1495.2061.

ARP-VIII-48\_PRESAT\_20150411\_01  
ARP-VIII-48

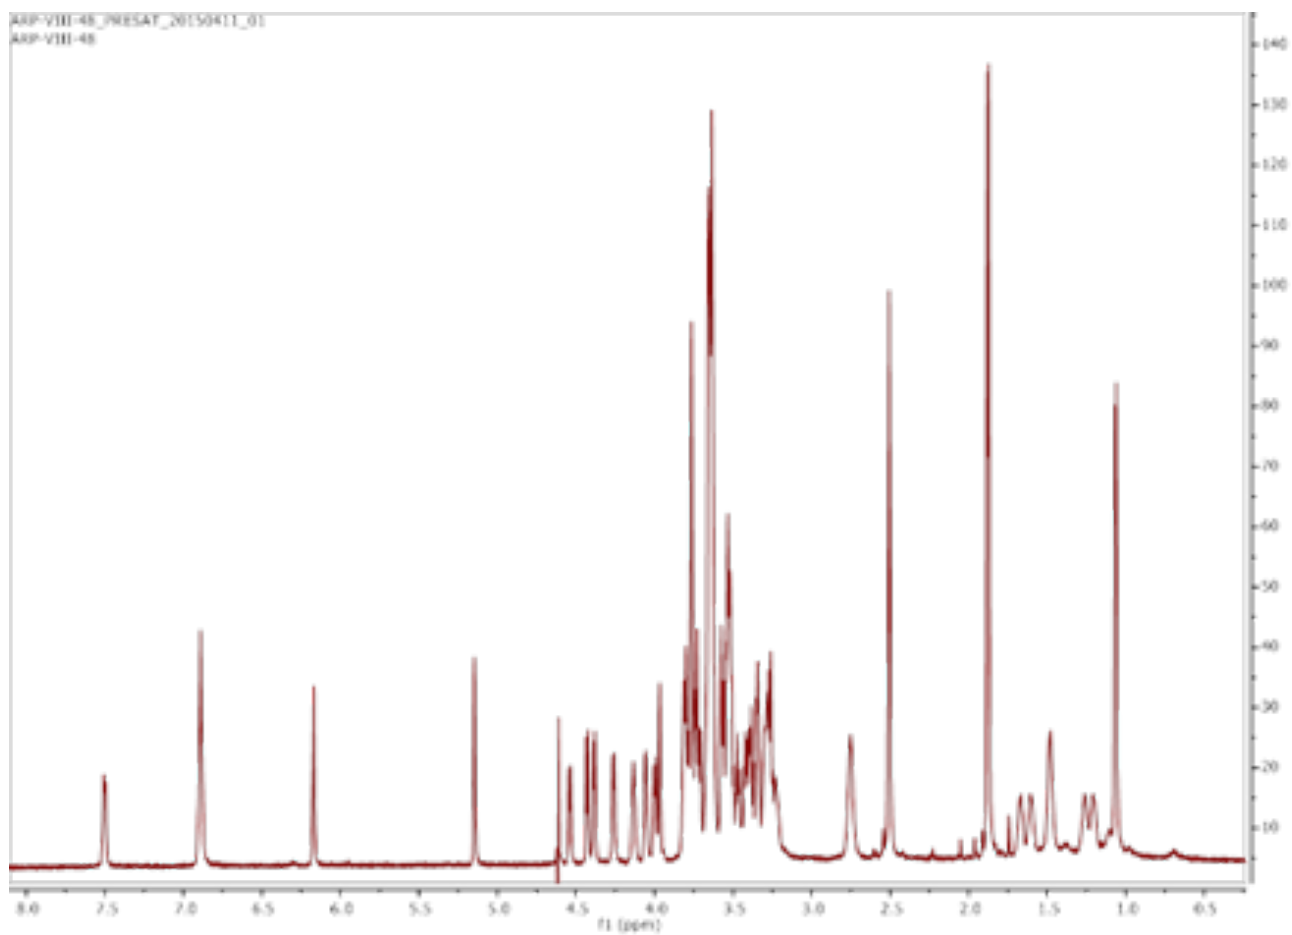

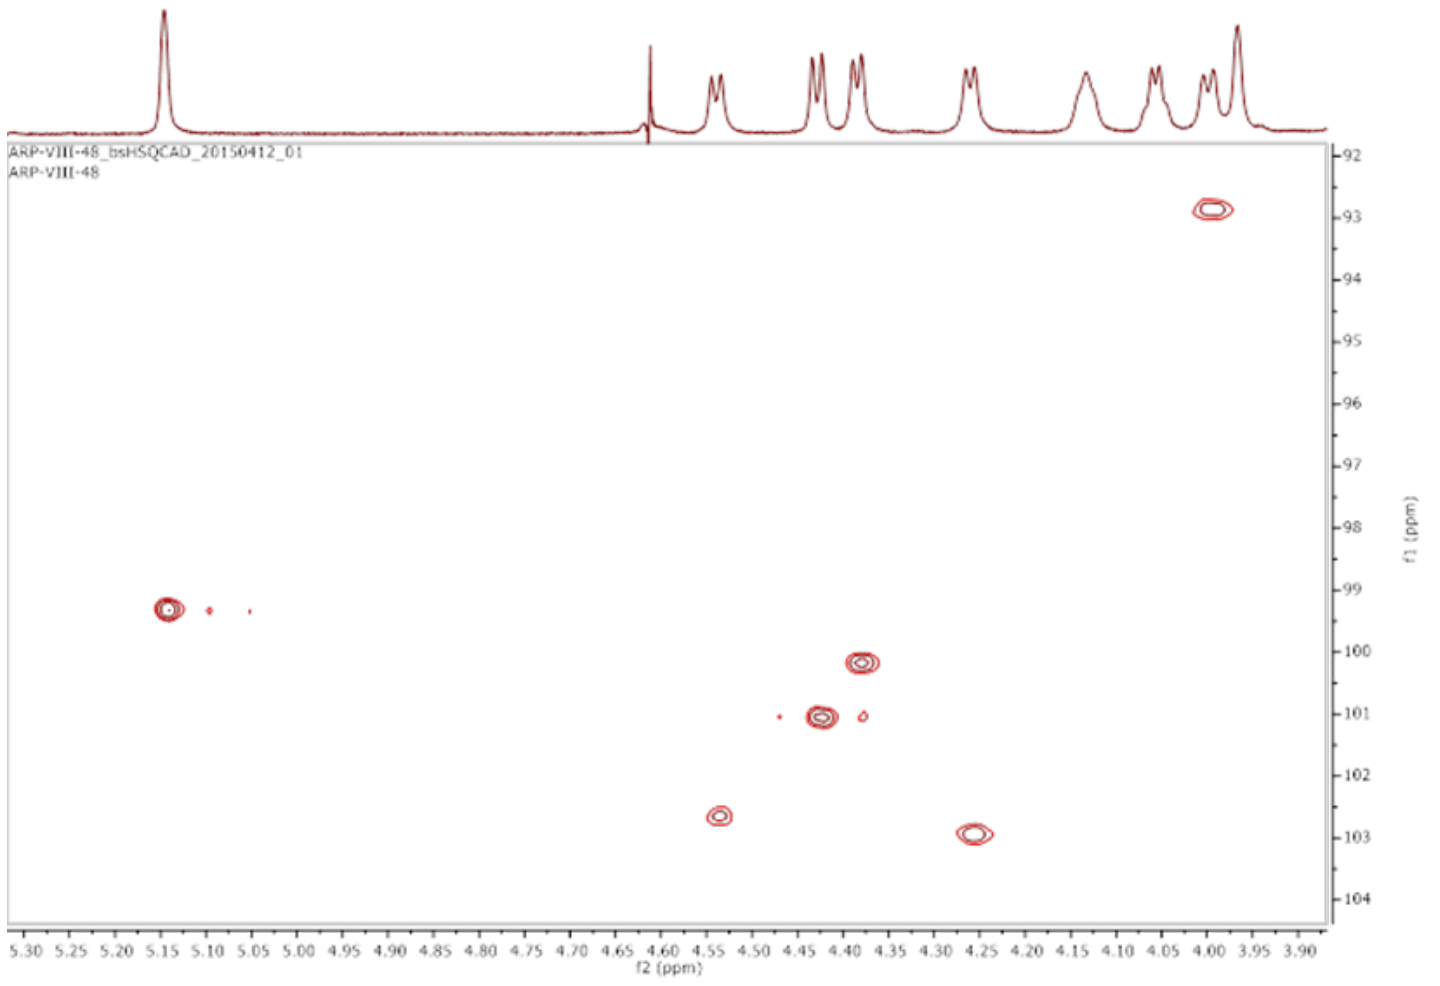

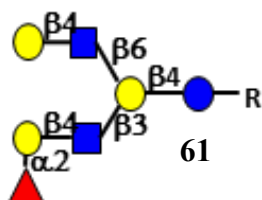

$^1\text{H}$  (800 MHz,  $\text{D}_2\text{O}$ ):  $\delta$  (ppm)

|                                     | H1                            | H2   | H3   | H4   | H5                               | H6  | $\text{CH}_3$                 | NHAc                   |
|-------------------------------------|-------------------------------|------|------|------|----------------------------------|-----|-------------------------------|------------------------|
| <b>Glc</b>                          | 4.00<br>(d, $J = 8.5$ Hz, 1H) | 3.35 | 3.41 | 3.48 | n/a <sup>[a]</sup>               | n/a | -                             | -                      |
| <b>Gal</b>                          | 4.26<br>(d, $J = 7.6$ Hz, 1H) | 3.41 | 3.53 | 3.97 | n/a                              | n/a | -                             | -                      |
| <b>GlcNAc</b>                       | 4.55<br>(d, $J = 8.1$ Hz, 1H) | 3.64 | 3.54 | 3.31 | n/a                              | n/a | -                             | 1.91 - 1.81<br>(m, 6H) |
| <b>Gal(2)</b>                       | 4.39<br>(d, $J = 7.5$ Hz, 1H) | 3.50 | 3.64 | 3.72 | n/a                              | n/a | -                             | -                      |
| <b>GlcNAc(2)</b>                    | 4.45<br>(d, $J = 8.5$ Hz, 1H) | 3.56 | 3.52 | 3.42 | n/a                              | n/a | -                             | 1.91 - 1.81<br>(m, 6H) |
| <b>Gal(3)</b>                       | 4.27                          | 3.37 | 3.49 | 3.75 | n/a                              | n/a | -                             | -                      |
| <b>Fuc(1)(<math>\alpha</math>2)</b> | 5.14<br>(d, $J = 3.1$ Hz, 1H) | 3.63 | n/a  | n/a  | 4.06<br>(br q, $J = 6.4$ Hz, 1H) | -   | 1.08<br>(d, $J = 6.2$ Hz, 3H) | -                      |

$^{13}\text{C}$  from BSHSQC (200 MHz,  $\text{D}_2\text{O}$ ):  $\delta$  (ppm)

|                                     | C1     |
|-------------------------------------|--------|
| <b>Glc</b>                          | 92.85  |
| <b>Gal</b>                          | 102.86 |
| <b>GlcNAc</b>                       | 102.67 |
| <b>Gal(2)</b>                       | 100.14 |
| <b>GlcNAc(2)</b>                    | 100.91 |
| <b>Gal(3)</b>                       | 102.83 |
| <b>Fuc(1)(<math>\alpha</math>2)</b> | 99.32  |

<sup>[a]</sup> Not assigned

<sup>[b]</sup> Not applicable

MALDI TOF-MS  $m/z$  calcd  $\text{C}_{67}\text{H}_{106}\text{N}_6\text{O}_{40}\text{Na}^-$  ( $\text{M} + \text{Na}$ )<sup>+</sup> exact 1657.6343, found 1657.0045.

ARP-VIII-53\_PRESAT\_20150419\_01  
ARP-VIII-53

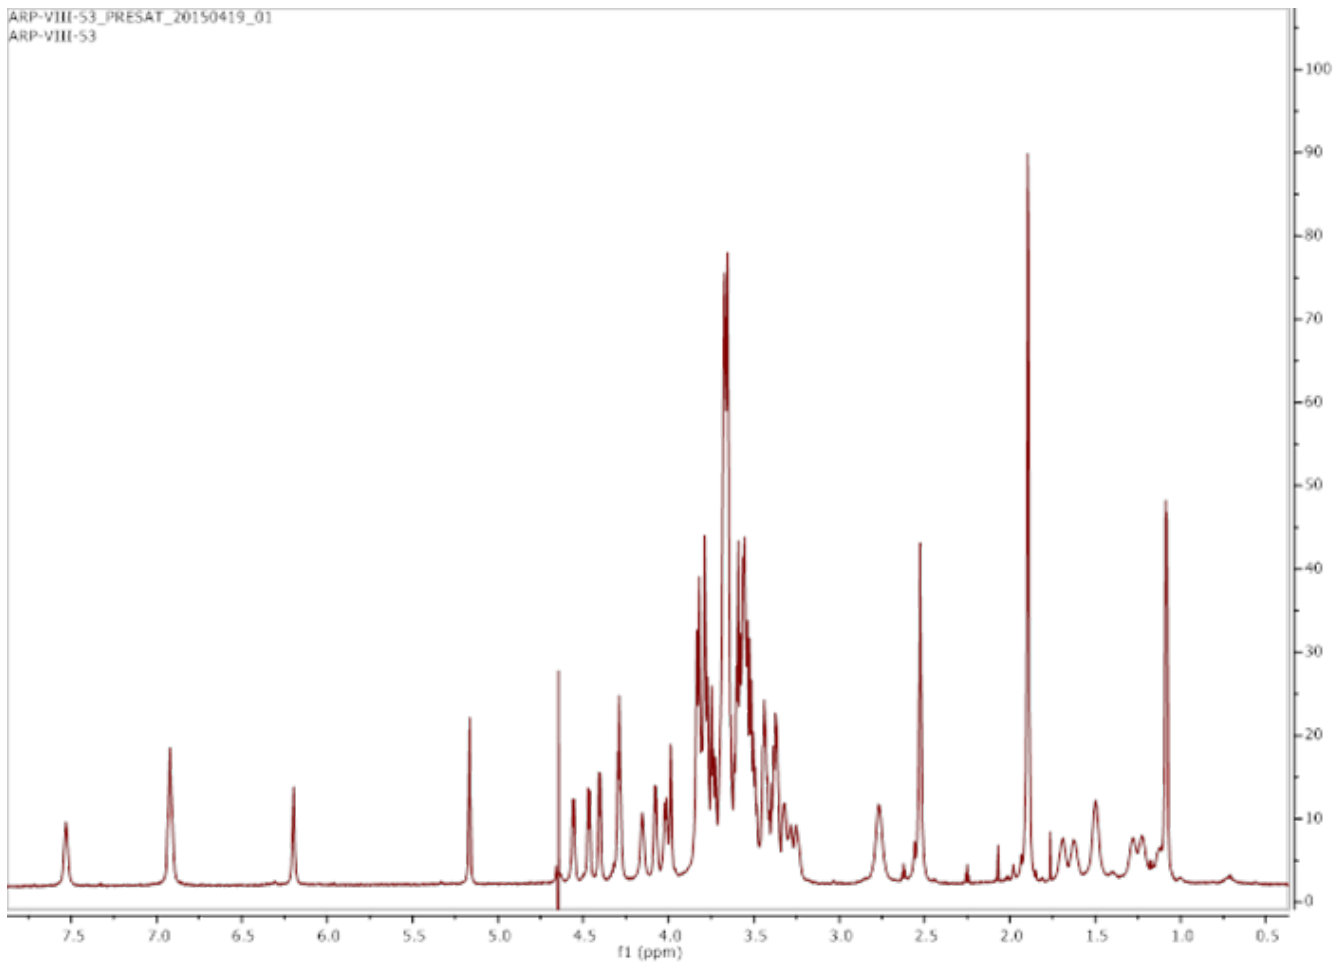

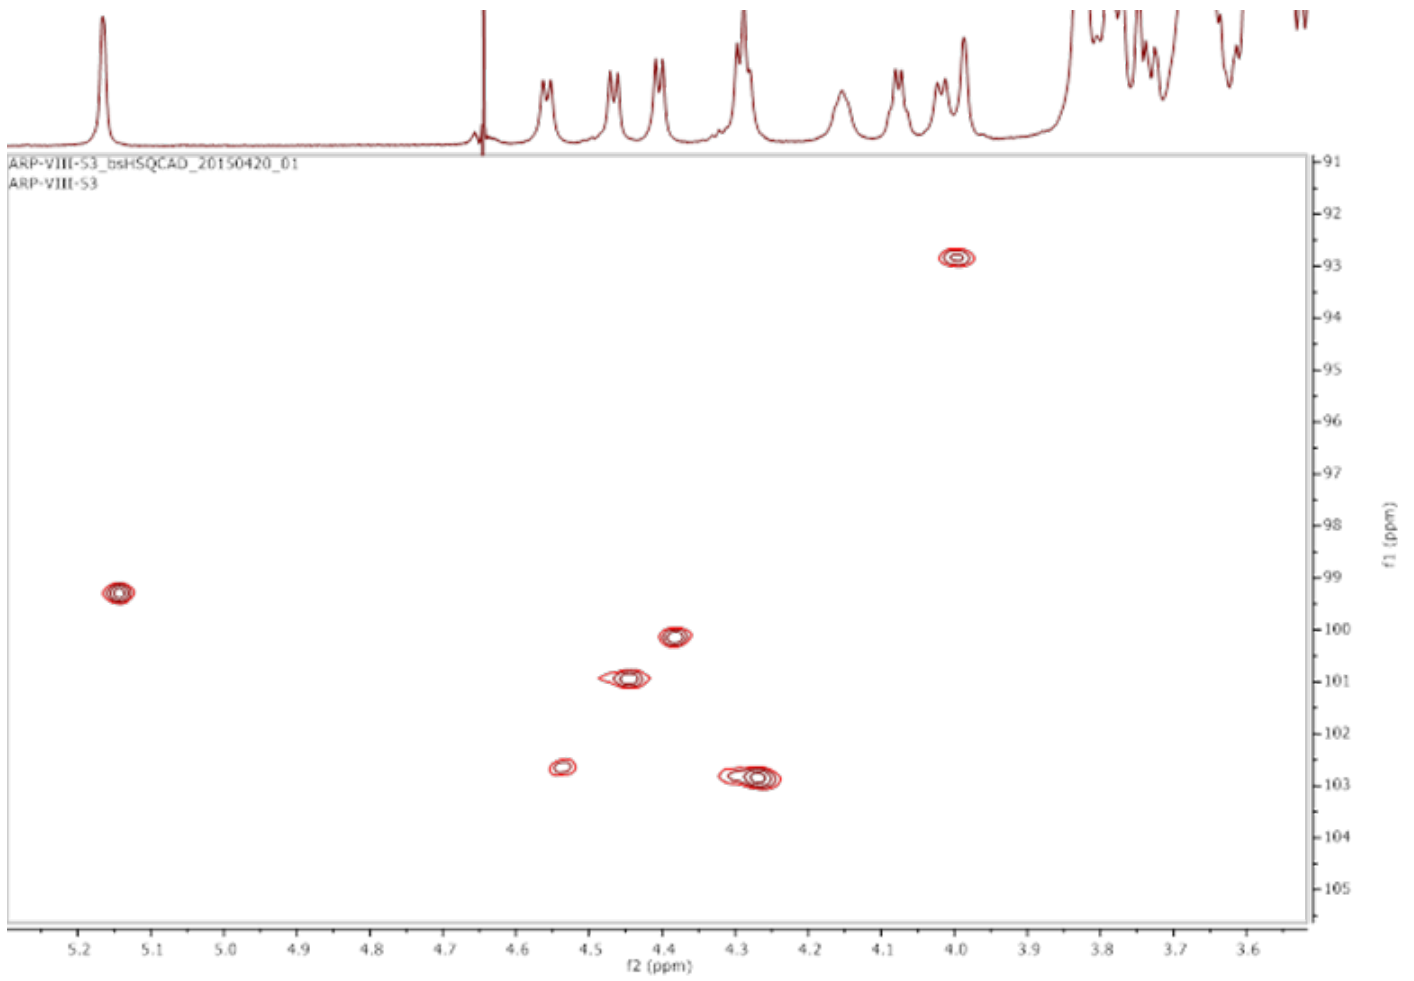

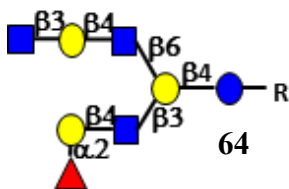

$^1\text{H}$  (800 MHz,  $\text{D}_2\text{O}$ ):  $\delta$  (ppm)

|                                     | H1                            | H2   | H3   | H4   | H5                               | H6  | $\text{CH}_3$                 | NHAc                   |
|-------------------------------------|-------------------------------|------|------|------|----------------------------------|-----|-------------------------------|------------------------|
| <b>Glc</b>                          | 4.00<br>(d, $J = 8.5$ Hz, 1H) | 3.35 | 3.43 | 3.48 | n/a <sup>[a]</sup>               | n/a | -                             | -                      |
| <b>Gal</b>                          | 4.27<br>(d, $J = 7.3$ Hz, 2H) | 3.41 | 3.55 | 3.99 | n/a                              | n/a | -                             | -                      |
| <b>GlcNAc</b>                       | 4.55<br>(d, $J = 6.1$ Hz, 1H) | 3.64 | 3.54 | 3.31 | n/a                              | n/a | -                             | 1.91 - 1.81<br>(m, 9H) |
| <b>Gal(2)</b>                       | 4.39<br>(d, $J = 7.5$ Hz, 1H) | 3.52 | 3.64 | 3.72 | n/a                              | n/a | -                             | -                      |
| <b>GlcNAc(2)</b>                    | 4.45<br>(d, $J = 7.8$ Hz, 1H) | 3.56 | 3.53 | 3.43 | n/a                              | n/a | -                             | 1.91 - 1.81<br>(m, 9H) |
| <b>Gal(3)</b>                       | 4.27<br>(d, $J = 7.3$ Hz, 2H) | 3.41 | 3.55 | 3.99 | n/a                              | n/a | -                             | -                      |
| <b>GlcNAc(3)</b>                    | 4.53<br>(d, $J = 8.6$ Hz, 1H) | 3.59 | 3.41 | 3.29 | n/a                              | n/a | -                             | 1.91-1.81<br>(m, 9H)   |
| <b>Fuc(1)(<math>\alpha</math>2)</b> | 5.14                          | 3.63 | n/a  | n/a  | 4.06<br>(br q, $J = 6.6$ Hz, 1H) | -   | 1.08<br>(d, $J = 5.9$ Hz, 3H) | -                      |

$^{13}\text{C}$  from BSHSQC (200 MHz,  $\text{D}_2\text{O}$ ):  $\delta$  (ppm)

|                                     | C1     |
|-------------------------------------|--------|
| <b>Glc</b>                          | 92.85  |
| <b>Gal</b>                          | 102.86 |
| <b>GlcNAc</b>                       | 102.73 |
| <b>Gal(2)</b>                       | 100.11 |
| <b>GlcNAc(2)</b>                    | 101.00 |
| <b>Gal(3)</b>                       | 102.87 |
| <b>GlcNAc(3)</b>                    | 102.73 |
| <b>Fuc(1)(<math>\alpha</math>2)</b> | 99.35  |

<sup>[a]</sup> Not assigned

<sup>[b]</sup> Not applicable

MALDI TOF-MS  $m/z$  calcd  $\text{C}_{75}\text{H}_{119}\text{N}_7\text{O}_{45}\text{Na}^-$  ( $\text{M} + \text{Na}$ )<sup>+</sup> exact 1860.7136, found 1860.1375.

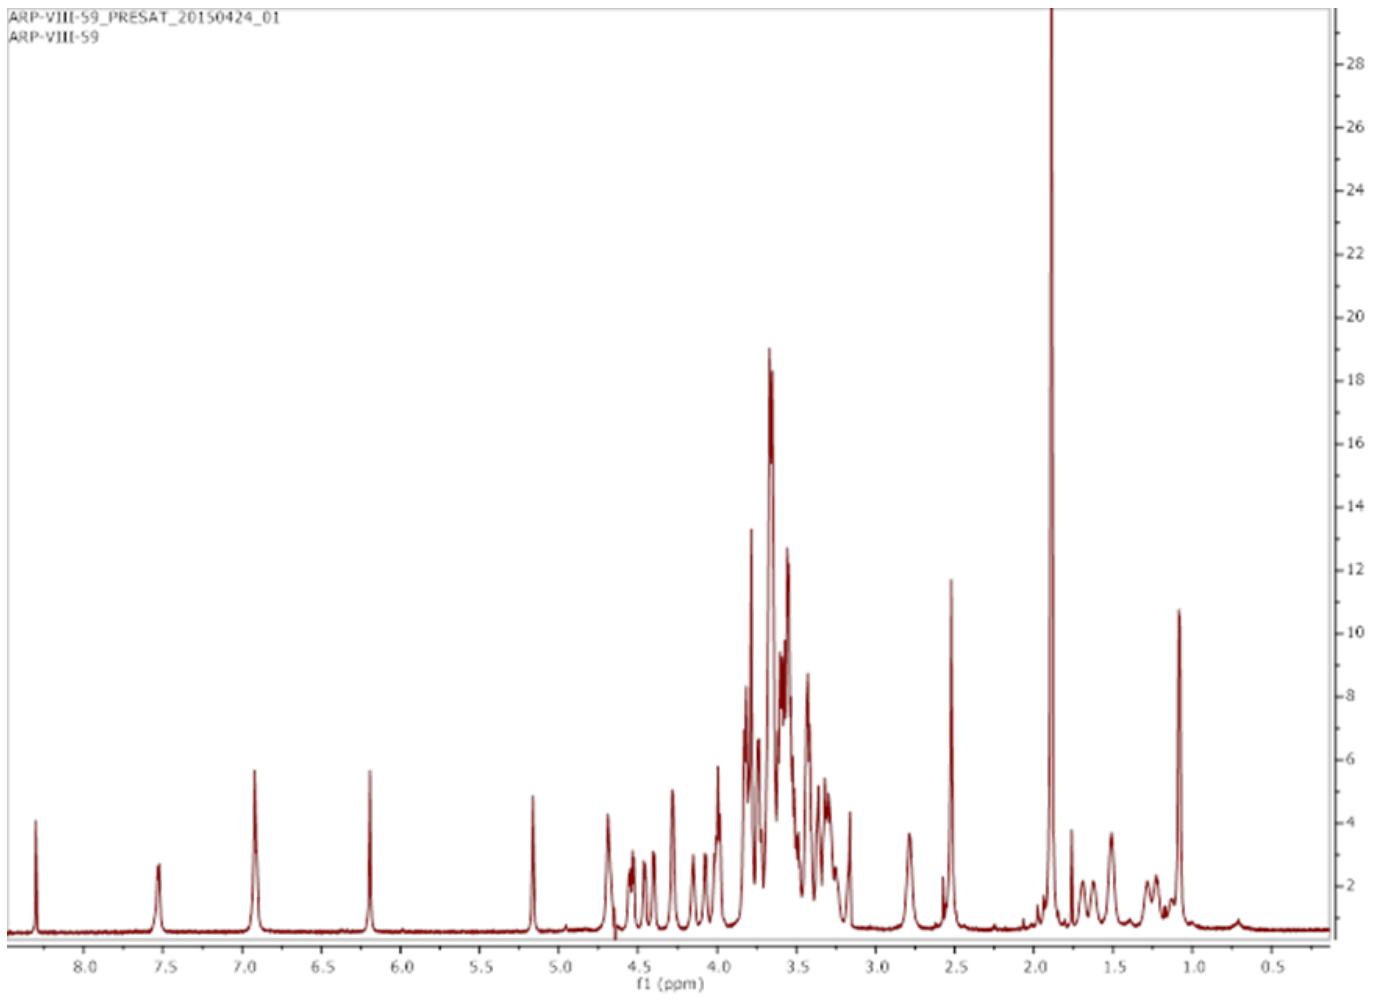



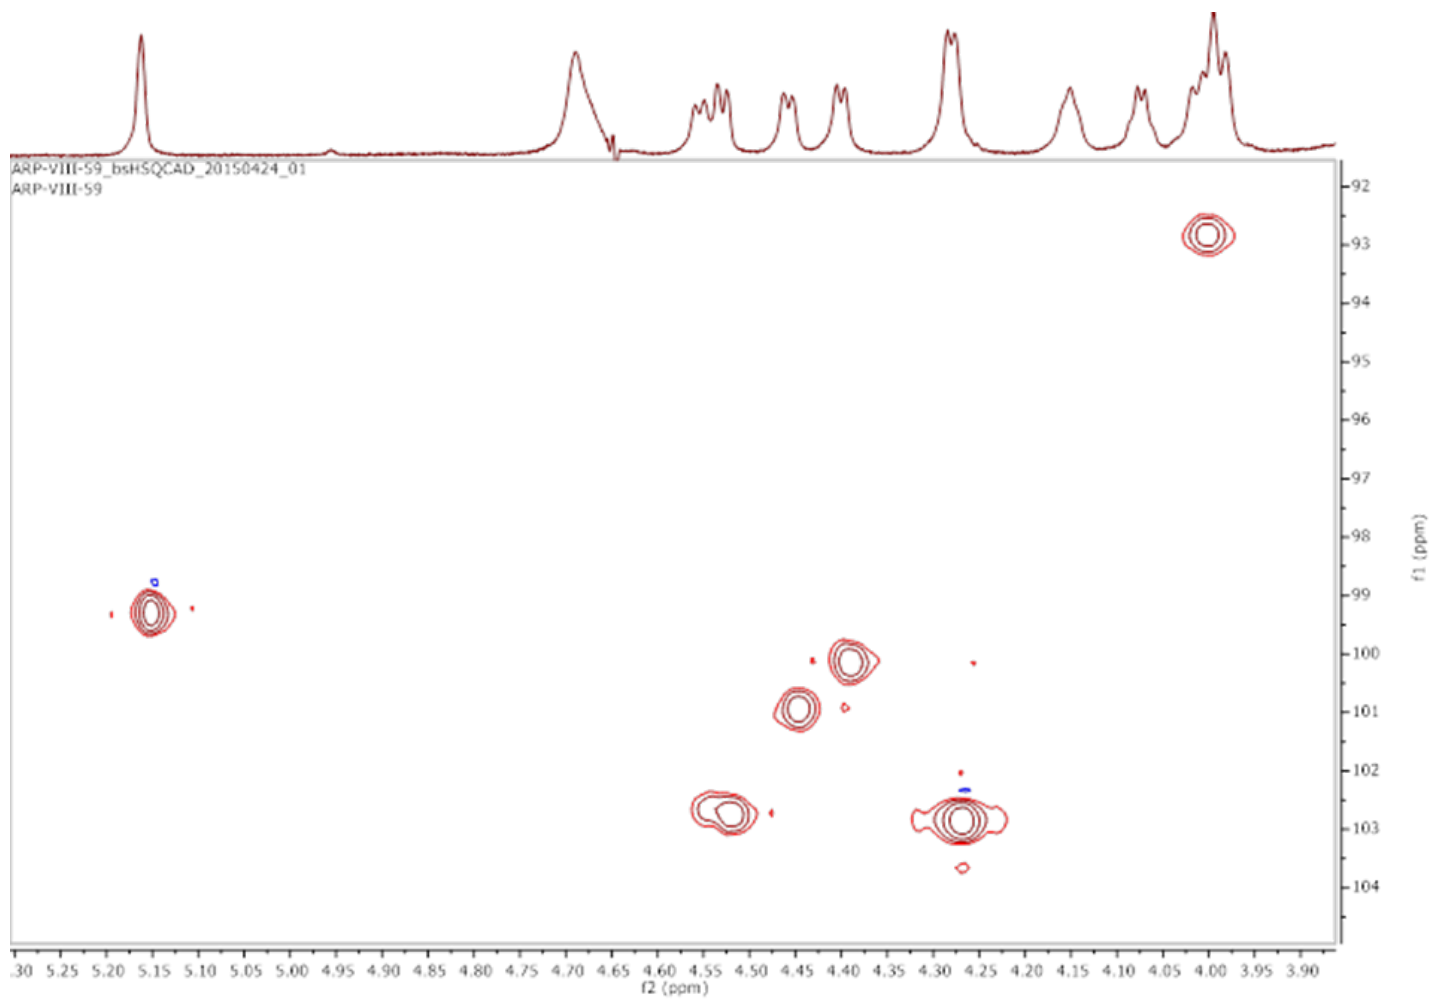

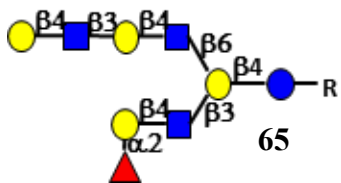

$^1\text{H}$  (800 MHz,  $\text{D}_2\text{O}$ ):  $\delta$  (ppm)

|                     | H1                            | H2   | H3   | H4   | H5                                    | H6  | $\text{CH}_3$                 | NHAc                   |
|---------------------|-------------------------------|------|------|------|---------------------------------------|-----|-------------------------------|------------------------|
| Glc                 | 4.00<br>(d, $J = 8.5$ Hz, 1H) | 3.35 | 3.39 | 3.45 | n/a <sup>[a]</sup>                    | n/a | -                             | -                      |
| Gal                 | 4.26<br>(d, $J = 7.8$ Hz, 2H) | 3.42 | 3.55 | 3.98 | n/a                                   | n/a | -                             | -                      |
| GlcNAc              | 4.54<br>(d, $J = 6.1$ Hz, 1H) | 3.67 | 3.59 | 3.31 | n/a                                   | n/a | -                             | 1.91 - 1.81<br>(m, 9H) |
| Gal(2)              | 4.39<br>(d, $J = 7.7$ Hz, 1H) | 3.52 | n/a  | 3.73 | n/a                                   | n/a | -                             | -                      |
| GlcNAc(2)           | 4.45<br>(d, $J = 8.2$ Hz, 1H) | 3.56 | 3.53 | 3.43 | n/a                                   | n/a | -                             | 1.91 - 1.81<br>(m, 9H) |
| Gal(3)              | 4.26<br>(d, $J = 7.8$ Hz, 2H) | 3.42 | 3.55 | 3.98 | n/a                                   | n/a | -                             | -                      |
| GlcNAc(3)           | 4.53<br>(d, $J = 8.6$ Hz, 1H) | 3.64 | 3.54 | 3.42 | n/a                                   | n/a | -                             | 1.91-1.81<br>(m, 9H)   |
| Gal(4)              | 4.31<br>(d, $J = 7.9$ Hz, 1H) | 3.39 | 3.51 | 3.77 | n/a                                   | n/a | -                             | -                      |
| Fuc(1)( $\alpha$ 2) | 5.14<br>(d, $J = 2.9$ Hz, 1H) | 3.62 | n/a  | n/a  | 4.06<br>(br q, $J = 7.1, 6.4$ Hz, 1H) | -   | 1.07<br>(d, $J = 6.5$ Hz, 3H) | -                      |

$^{13}\text{C}$  from BSHSQC (200 MHz,  $\text{D}_2\text{O}$ ):  $\delta$  (ppm)

|                     | C1     |
|---------------------|--------|
| Glc                 | 92.83  |
| Gal                 | 102.94 |
| GlcNAc              | 102.68 |
| Gal(2)              | 100.13 |
| GlcNAc(2)           | 101.95 |
| Gal(3)              | 102.94 |
| GlcNAc(3)           | 102.68 |
| Gal(4)              | 102.86 |
| Fuc(1)( $\alpha$ 2) | 99.28  |

<sup>[a]</sup> Not assigned

<sup>[b]</sup> Not applicable

MALDI TOF-MS  $m/z$  calcd  $\text{C}_{81}\text{H}_{129}\text{N}_7\text{O}_{50}\text{Na}^-$  ( $\text{M} + \text{Na}$ )<sup>+</sup> exact 2022.7664, found 2022.0397.

ARP-VIII-62\_PRESAT\_20150503\_01  
ARP-VIII-62

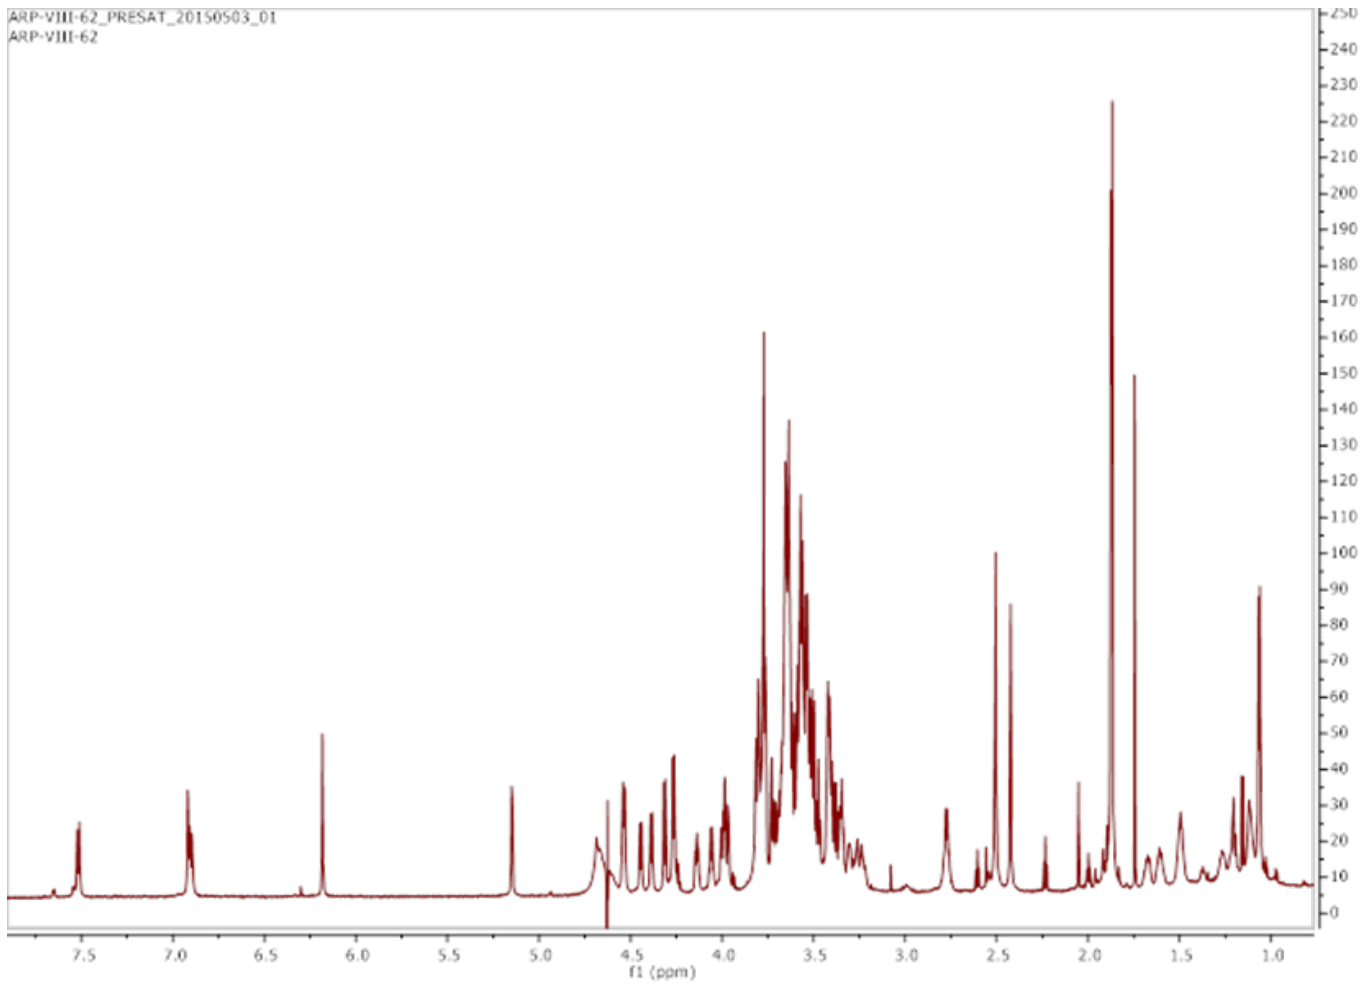

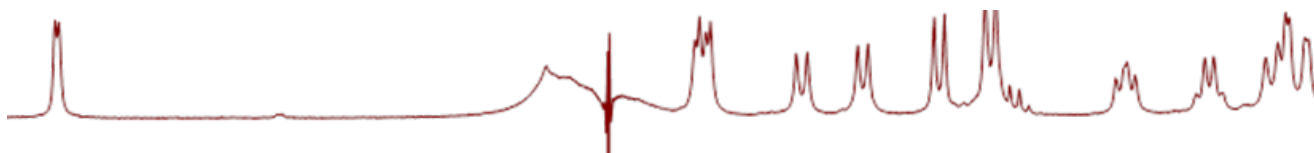

ARP-VIII-62\_bsHSQCAD\_20150504\_01  
ARP-VIII-62

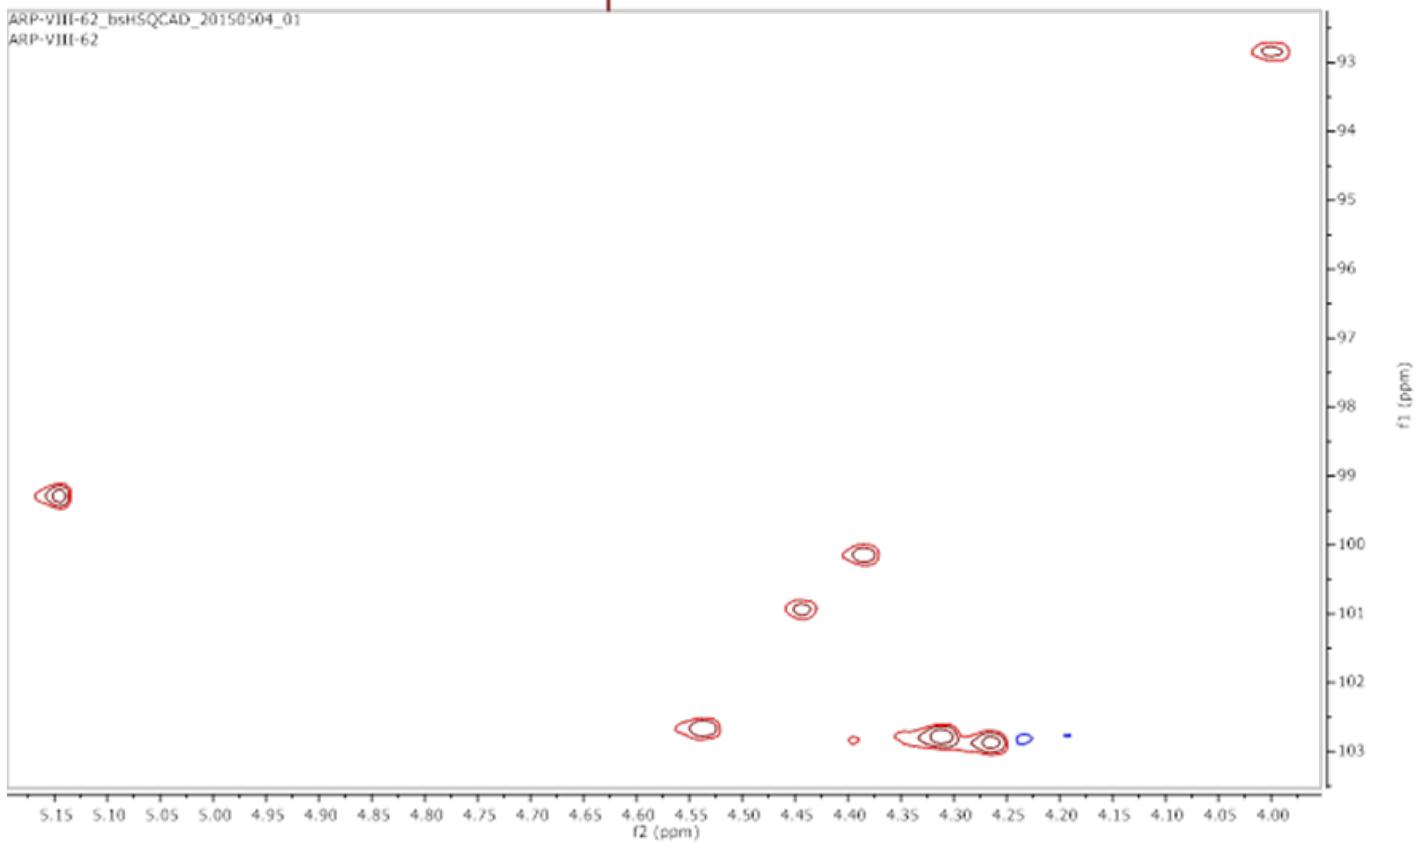

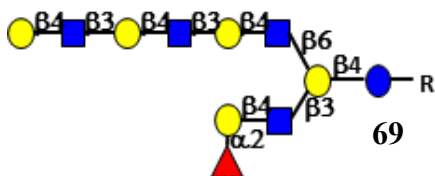

$^1\text{H}$  (800 MHz,  $\text{D}_2\text{O}$ ):  $\delta$  (ppm)

|                     | H1                            | H2   | H3   | H4   | H5                 | H6  | $\text{CH}_3$                 | NHAc                    |
|---------------------|-------------------------------|------|------|------|--------------------|-----|-------------------------------|-------------------------|
| Glc                 | 4.00                          | 3.35 | 3.43 | 3.49 | n/a <sup>[a]</sup> | n/a | -                             | -                       |
| Gal                 | 4.26                          | 3.42 | 3.56 | 3.90 | n/a                | n/a | -                             | -                       |
| GlcNAc              | 4.55                          | 3.65 | 3.57 | 3.43 | n/a                | n/a | -                             | 1.91 - 1.81<br>(m, 12H) |
| Gal(2)              | 4.39                          | 3.51 | n/a  | 3.73 | n/a                | n/a | -                             | -                       |
| GlcNAc(2)           | 4.44                          | 3.57 | 3.51 | 3.43 | n/a                | n/a | -                             | 1.91 - 1.81<br>(m, 12H) |
| Gal(3)              | 4.26                          | 3.43 | 3.56 | 3.99 | n/a                | n/a | -                             | -                       |
| GlcNAc(3)           | 4.55                          | 3.65 | 3.57 | 3.43 | n/a                | n/a | -                             | 1.91-1.81<br>(m, 12H)   |
| Gal(4)              | 4.30                          | 3.43 | 3.58 | 4.00 | n/a                | n/a | -                             | -                       |
| GlcNAc(4)           | 4.55                          | 3.65 | 3.57 | 3.43 | n/a                | n/a | -                             | 1.91-1.81<br>(m, 12H)   |
| Gal(5)              | 4.32                          | 3.38 | 3.51 | 3.77 | n/a                | n/a | -                             | -                       |
| Fuc(1)( $\alpha$ 2) | 5.15<br>(d, $J = 3.2$ Hz, 1H) | 3.65 | n/a  | n/a  | 4.04               | -   | 1.06<br>(d, $J = 6.6$ Hz, 3H) | -                       |

$^{13}\text{C}$  from BSHSQC (200 MHz,  $\text{D}_2\text{O}$ ):  $\delta$  (ppm)

|                     | C1     |
|---------------------|--------|
| Glc                 | 92.91  |
| Gal                 | 102.83 |
| GlcNAc              | 102.74 |
| Gal(2)              | 100.15 |
| GlcNAc(2)           | 100.95 |
| Gal(3)              | 102.83 |
| GlcNAc(3)           | 102.74 |
| Gal(4)              | 102.80 |
| GlcNAc(4)           | 102.74 |
| Gal(5)              | 102.80 |
| Fuc(1)( $\alpha$ 2) | 99.36  |

<sup>[a]</sup> Not assigned

<sup>[b]</sup> Not applicable

MALDI TOF-MS  $m/z$  calcd  $\text{C}_{95}\text{H}_{152}\text{N}_8\text{O}_{60}\text{Na}^-$  ( $\text{M} + \text{Na}$ )<sup>+</sup> exact 2387.8986, found 2387.0994.

ARP-VIII-69\_PRESAT\_20150527\_01  
ARP-VIII-69

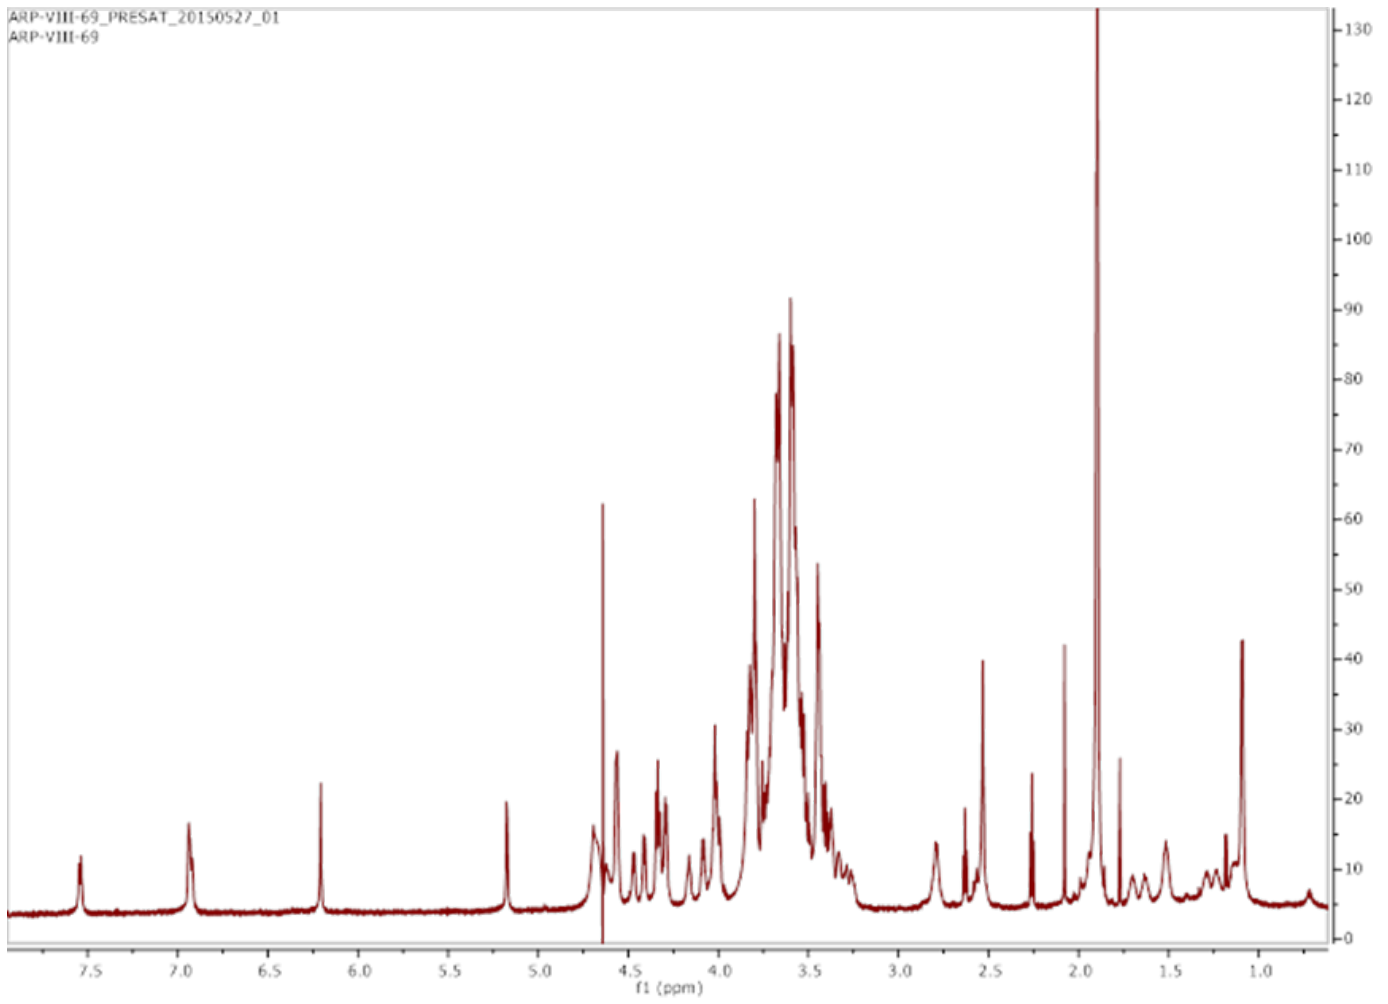

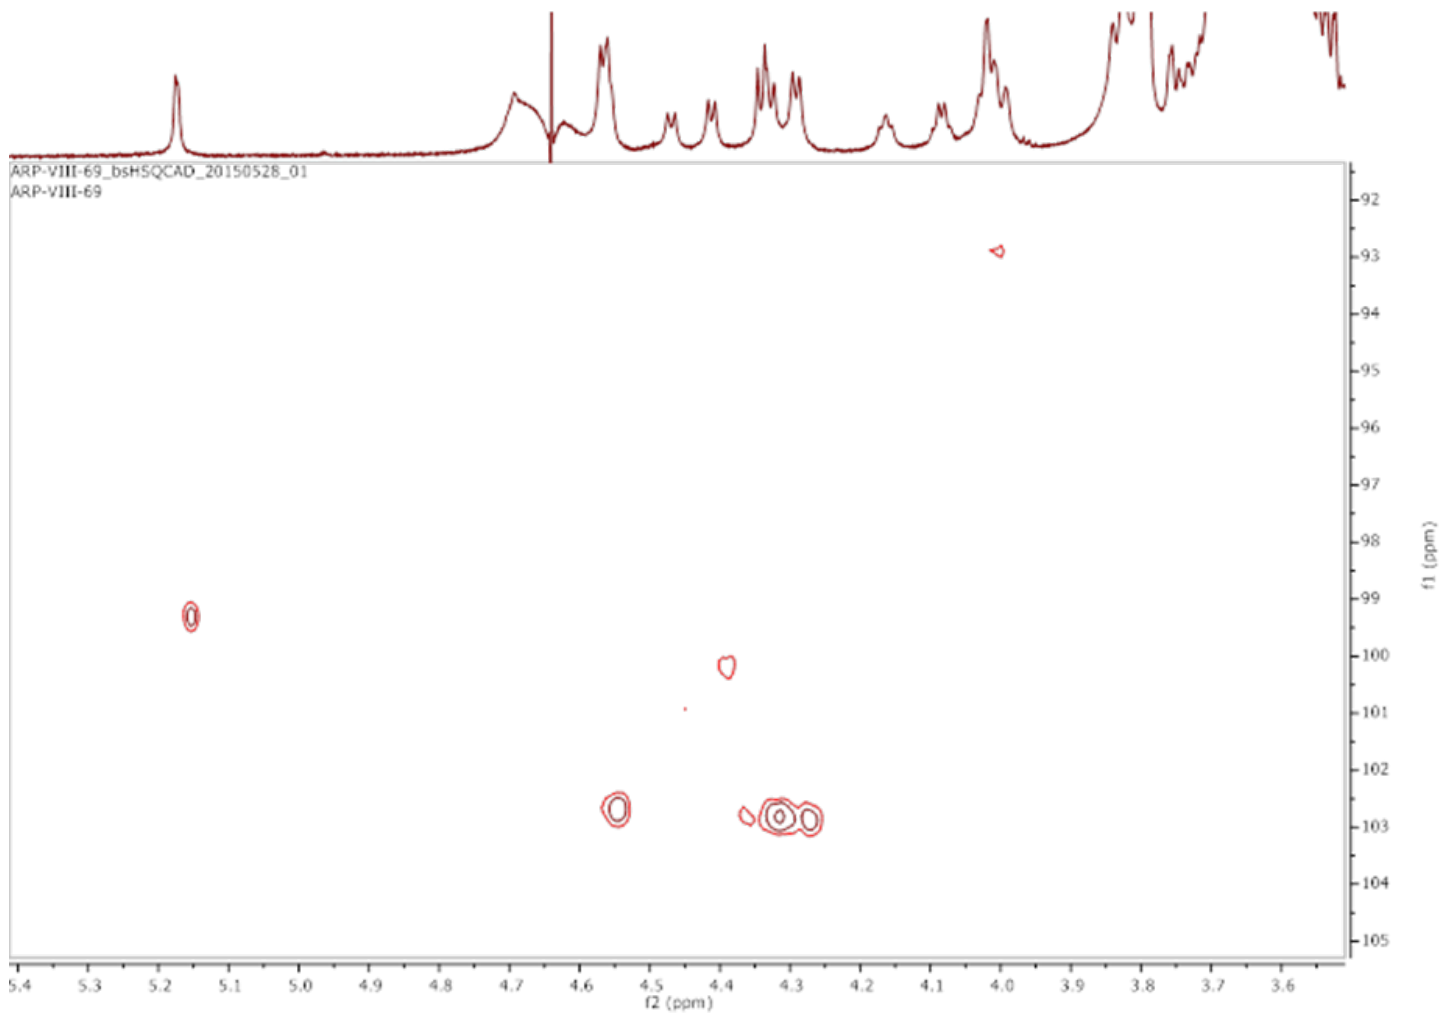

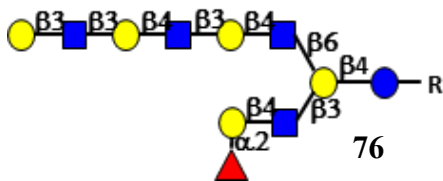

$^1\text{H}$  (600 MHz,  $\text{D}_2\text{O}$ ):  $\delta$  (ppm)

|                     | H1                            | H2   | H3   | H4   | H5                 | H6  | $\text{CH}_3$                 | NHAc                    |
|---------------------|-------------------------------|------|------|------|--------------------|-----|-------------------------------|-------------------------|
| Glc                 | 4.00                          | 3.35 | 3.43 | 3.49 | n/a <sup>[a]</sup> | n/a | -                             | -                       |
| Gal                 | 4.26                          | 3.42 | 3.56 | 3.99 | n/a                | n/a | -                             | -                       |
| GlcNAc              | 4.55                          | 3.65 | 3.57 | 3.43 | n/a                | n/a | -                             | 1.91 - 1.81<br>(m, 12H) |
| Gal(2)              | 4.39<br>(d, $J = 7.3$ Hz, 1H) | 3.51 | 3.64 | 3.73 | n/a                | n/a | -                             | -                       |
| GlcNAc(2)           | 4.44                          | 3.57 | n/a  | 3.43 | n/a                | n/a | -                             | 1.91 - 1.81<br>(m, 12H) |
| Gal(3)              | 4.26                          | 3.42 | 3.56 | 3.99 | n/a                | n/a | -                             | -                       |
| GlcNAc(3)           | 4.55                          | 3.65 | 3.57 | 3.43 | n/a                | n/a | -                             | 1.91-1.81<br>(m, 12H)   |
| Gal(4)              | 4.30                          | 3.43 | 3.58 | 4.00 | n/a                | n/a | -                             | -                       |
| GlcNAc(4)           | 4.55                          | 3.74 | n/a  | 3.32 | n/a                | n/a | -                             | 1.91-1.81<br>(m, 12H)   |
| Gal(5)              | 4.28                          | 3.38 | 3.66 | 3.75 | n/a                | n/a | -                             | -                       |
| Fuc(1)( $\alpha$ 2) | 5.15                          | 3.65 | n/a  | n/a  | 4.07               | -   | 1.09<br>(d, $J = 5.8$ Hz, 3H) | -                       |

$^{13}\text{C}$  from BSHSQC (150 MHz,  $\text{D}_2\text{O}$ ):  $\delta$  (ppm)

|                     | C1     |
|---------------------|--------|
| Glc                 | 92.98  |
| Gal                 | 102.83 |
| GlcNAc              | 102.53 |
| Gal(2)              | 100.19 |
| GlcNAc(2)           | 100.92 |
| Gal(3)              | 102.83 |
| GlcNAc(3)           | 102.53 |
| Gal(4)              | 102.75 |
| GlcNAc(4)           | 102.53 |
| Gal(5)              | 103.48 |
| Fuc(1)( $\alpha$ 2) | 99.31  |

<sup>[a]</sup> Not assigned

<sup>[b]</sup> Not applicable

MALDI TOF-MS  $m/z$  calcd  $\text{C}_{95}\text{H}_{152}\text{N}_8\text{O}_{60}\text{Na}^-$  ( $\text{M} + \text{Na}$ )<sup>+</sup> exact 2387.8986, found 2387.3384.



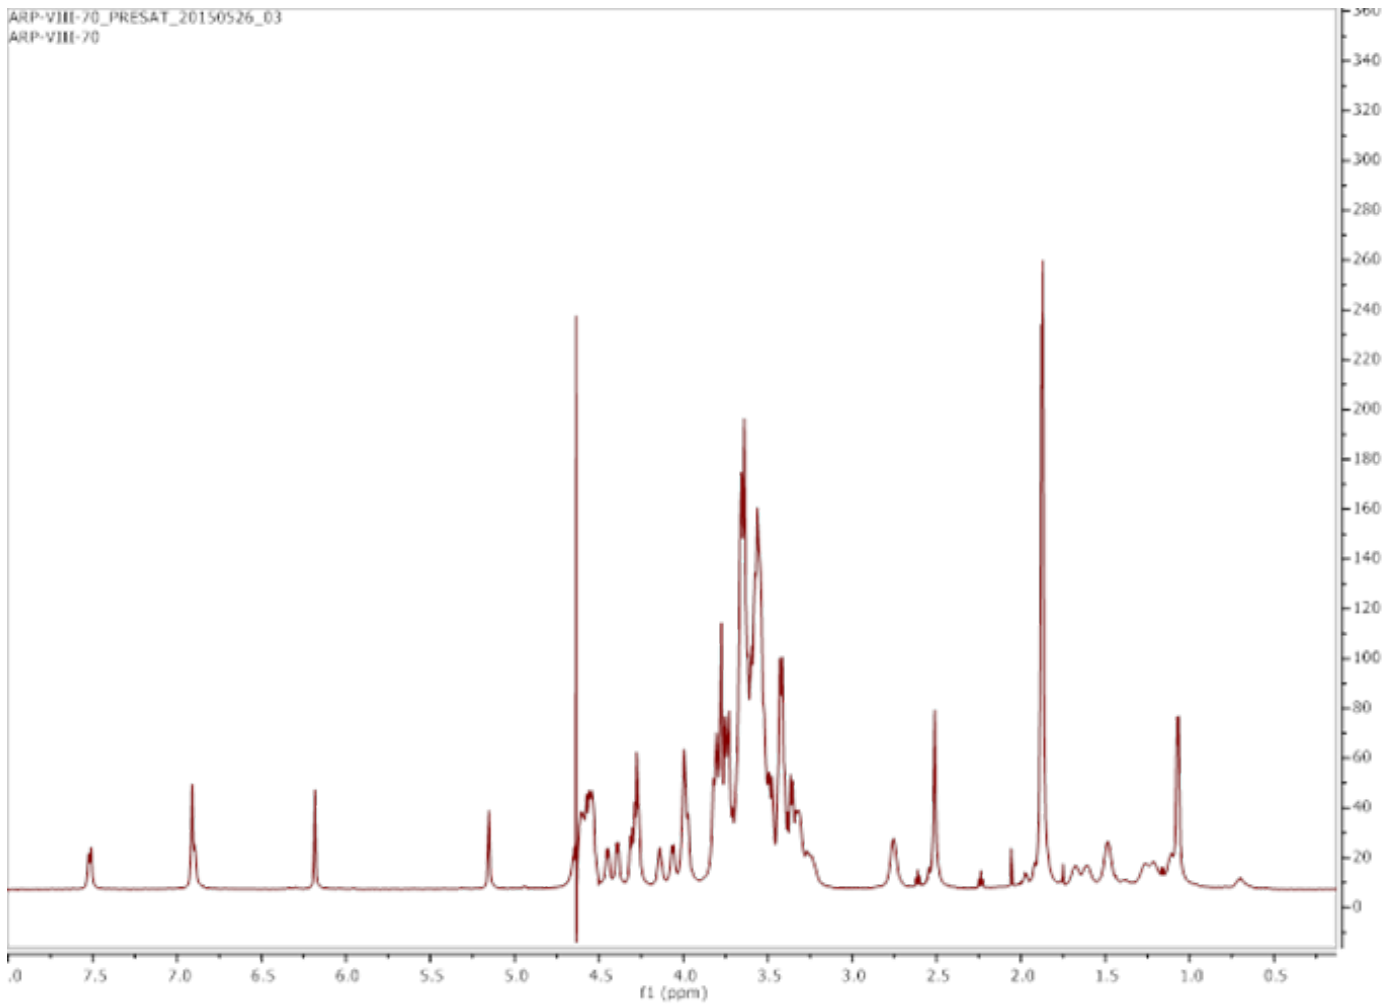

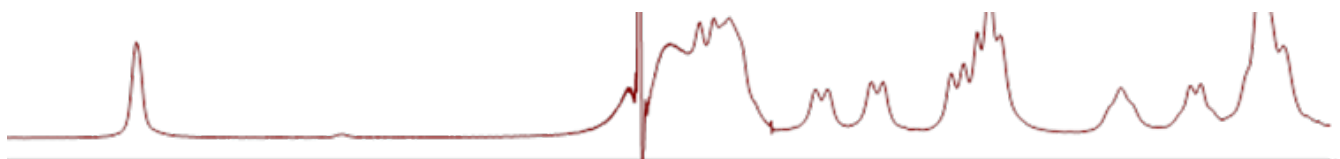

ARP-VIII-70\_bsHSQCAD\_20150526\_01  
ARP-VIII-70

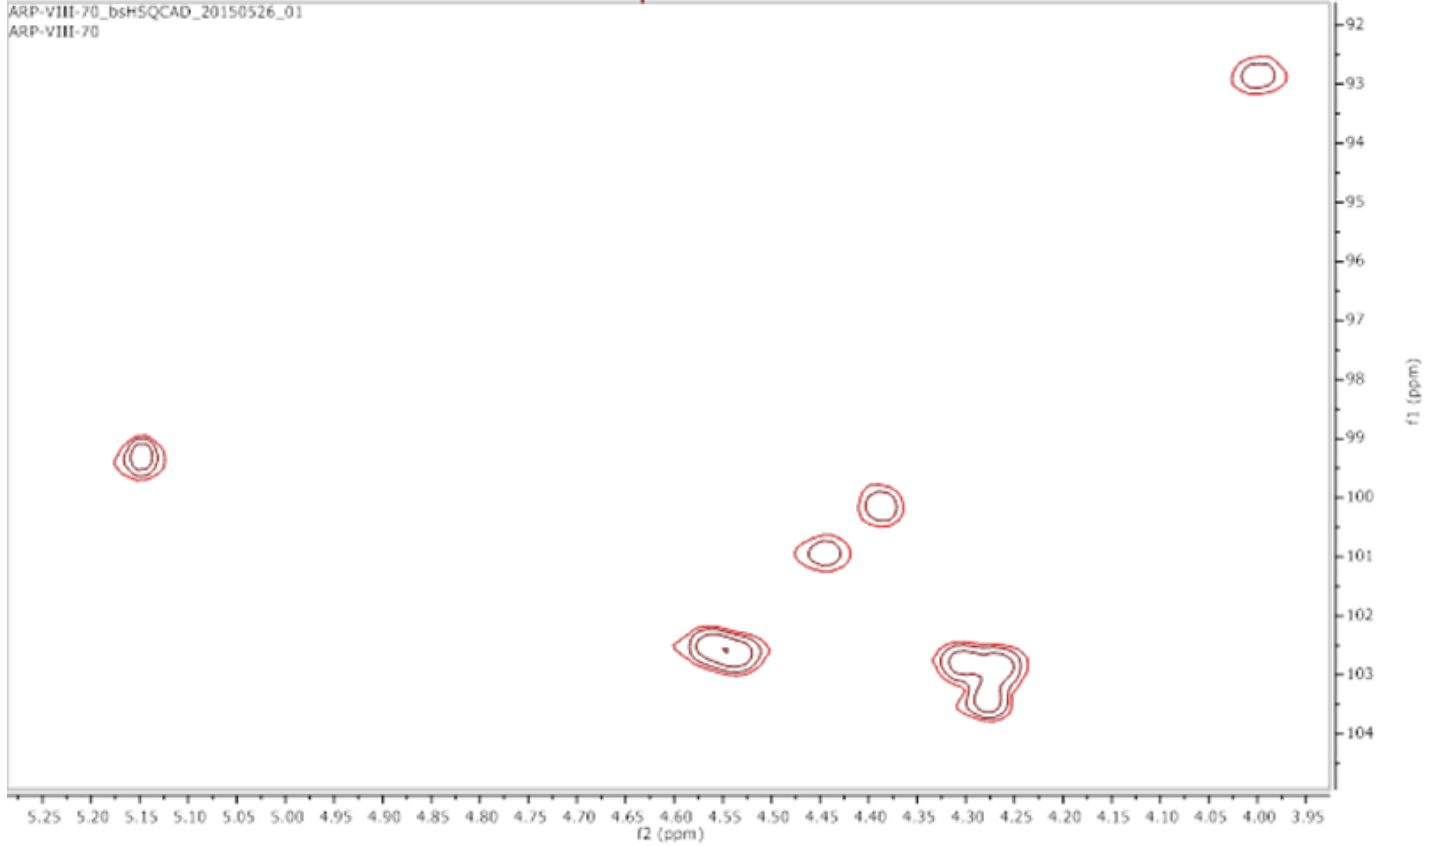

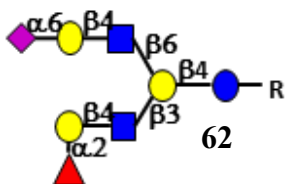

$^1\text{H}$  (600 MHz,  $\text{D}_2\text{O}$ ):  $\delta$  (ppm)

|                     | H1                            | H2   | H3                         | H4   | H5                 | H6   | H7  | H8  | H9           | $\text{CH}_3$                 | NHAc                   |
|---------------------|-------------------------------|------|----------------------------|------|--------------------|------|-----|-----|--------------|-------------------------------|------------------------|
| Glc                 | 4.00<br>(d, $J = 9.1$ Hz, 1H) | 3.35 | 3.41                       | 3.47 | n/a <sup>[a]</sup> | n/a  | -   | -   | -            | -                             | -                      |
| Gal                 | 4.27<br>(d, $J = 7.8$ Hz, 1H) | 3.42 | 3.53                       | 3.98 | n/a                | n/a  | -   | -   | -            | -                             | -                      |
| GlcNAc              | 4.55<br>(d, $J = 8.4$ Hz, 1H) | 3.65 | 3.55                       | 3.30 | n/a                | n/a  | -   | -   | -            | -                             | 1.92 - 1.84<br>(m, 9H) |
| Gal(2)              | 4.39<br>(d, $J = 7.6$ Hz, 1H) | 3.50 | 3.64                       | 3.73 | n/a                | n/a  | -   | -   | -            | -                             | -                      |
| GlcNAc(2)           | 4.47<br>(d, $J = 7.6$ Hz, 1H) | 3.57 | 3.40                       | 3.43 | n/a                | n/a  | -   | -   | -            | -                             | 1.92 - 1.84<br>(m, 9H) |
| Gal(3)              | 4.23<br>(d, $J = 7.8$ Hz, 1H) | 3.36 | 3.48                       | 3.76 | n/a                | n/a  | -   | -   | -            | -                             | -                      |
| Fuc(1)( $\alpha$ 2) | 5.15                          | 3.65 | n/a                        | 3.60 | 4.06               | -    | -   | -   | -            | 1.06<br>(d, $J = 6.4$ Hz, 3H) | -                      |
| Neu5Ac              | -                             | -    | 2.52 - eq.<br>1.55 - axial | 3.47 | 3.62               | 3.51 | n/a | n/a | 3.72<br>3.48 | -                             | 1.92 - 1.84<br>(m, 9H) |

$^{13}\text{C}$  from BSHSQC (150 MHz,  $\text{D}_2\text{O}$ ):  $\delta$  (ppm)

|                     | C1     |
|---------------------|--------|
| Glc                 | 92.84  |
| Gal                 | 102.79 |
| GlcNAc              | 102.69 |
| Gal(2)              | 100.14 |
| GlcNAc(2)           | 100.89 |
| Gal(3)              | 103.42 |
| Fuc(1)( $\alpha$ 2) | 99.41  |

<sup>[a]</sup> Not assigned

<sup>[b]</sup> Not applicable

MALDI TOF-MS  $m/z$  calcd  $\text{C}_{78}\text{H}_{122}\text{N}_7\text{O}_{48}\text{Na}_2^{--}$  ( $\text{M} + 2\text{Na}$ )<sup>+</sup> exact 1970.7122, found 1970.2726

ARP-VIII-58\_mono\_Neu5Ac\_PRESAT\_20150509\_01  
ARP-VIII-58\_mono\_Neu5Ac

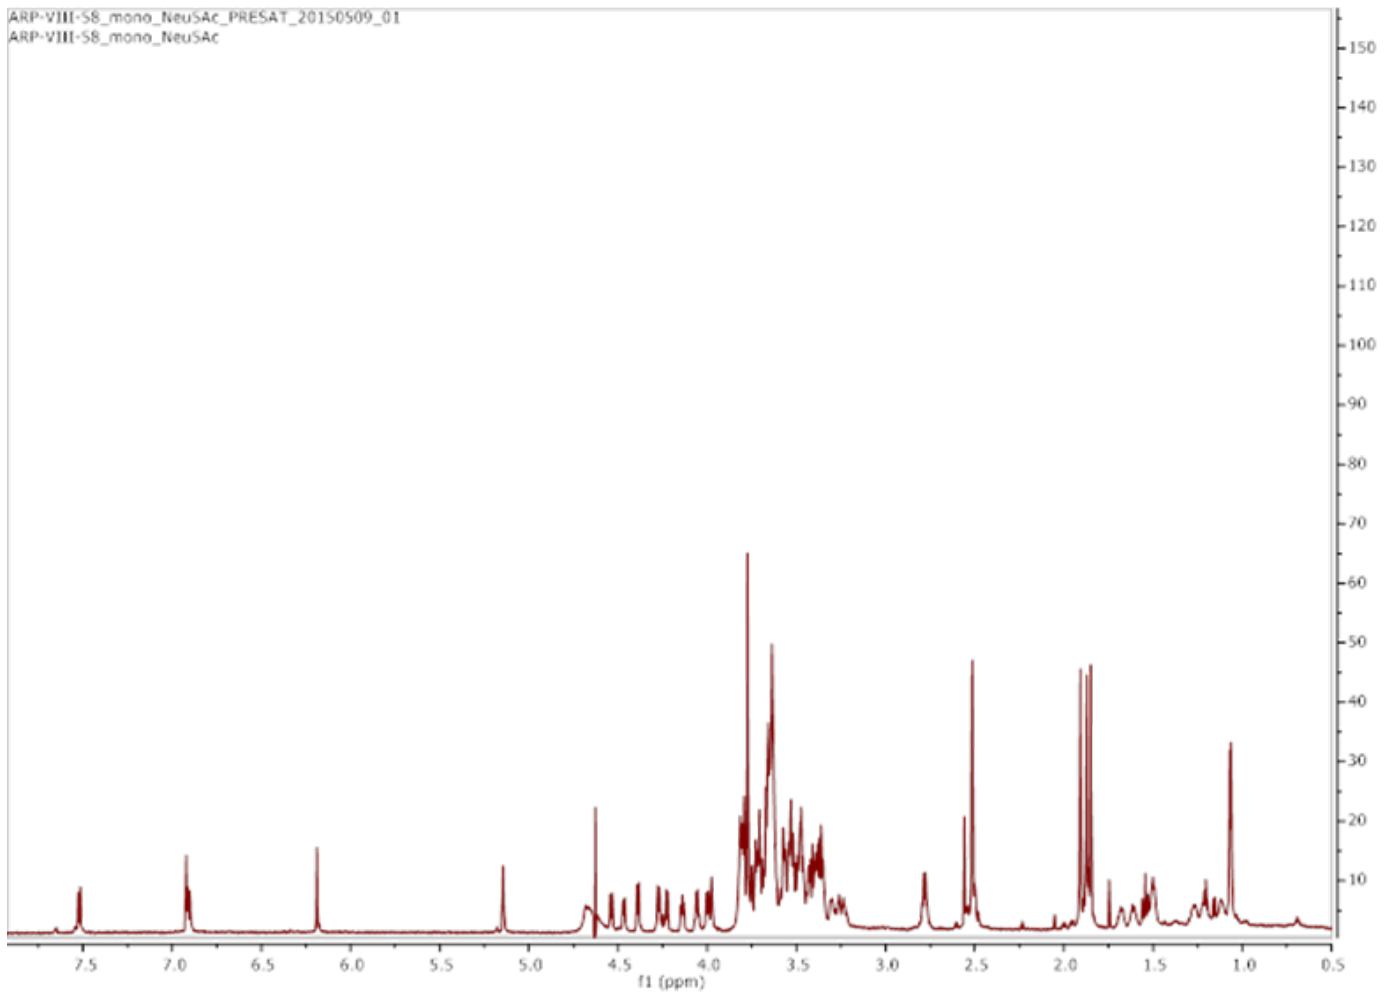

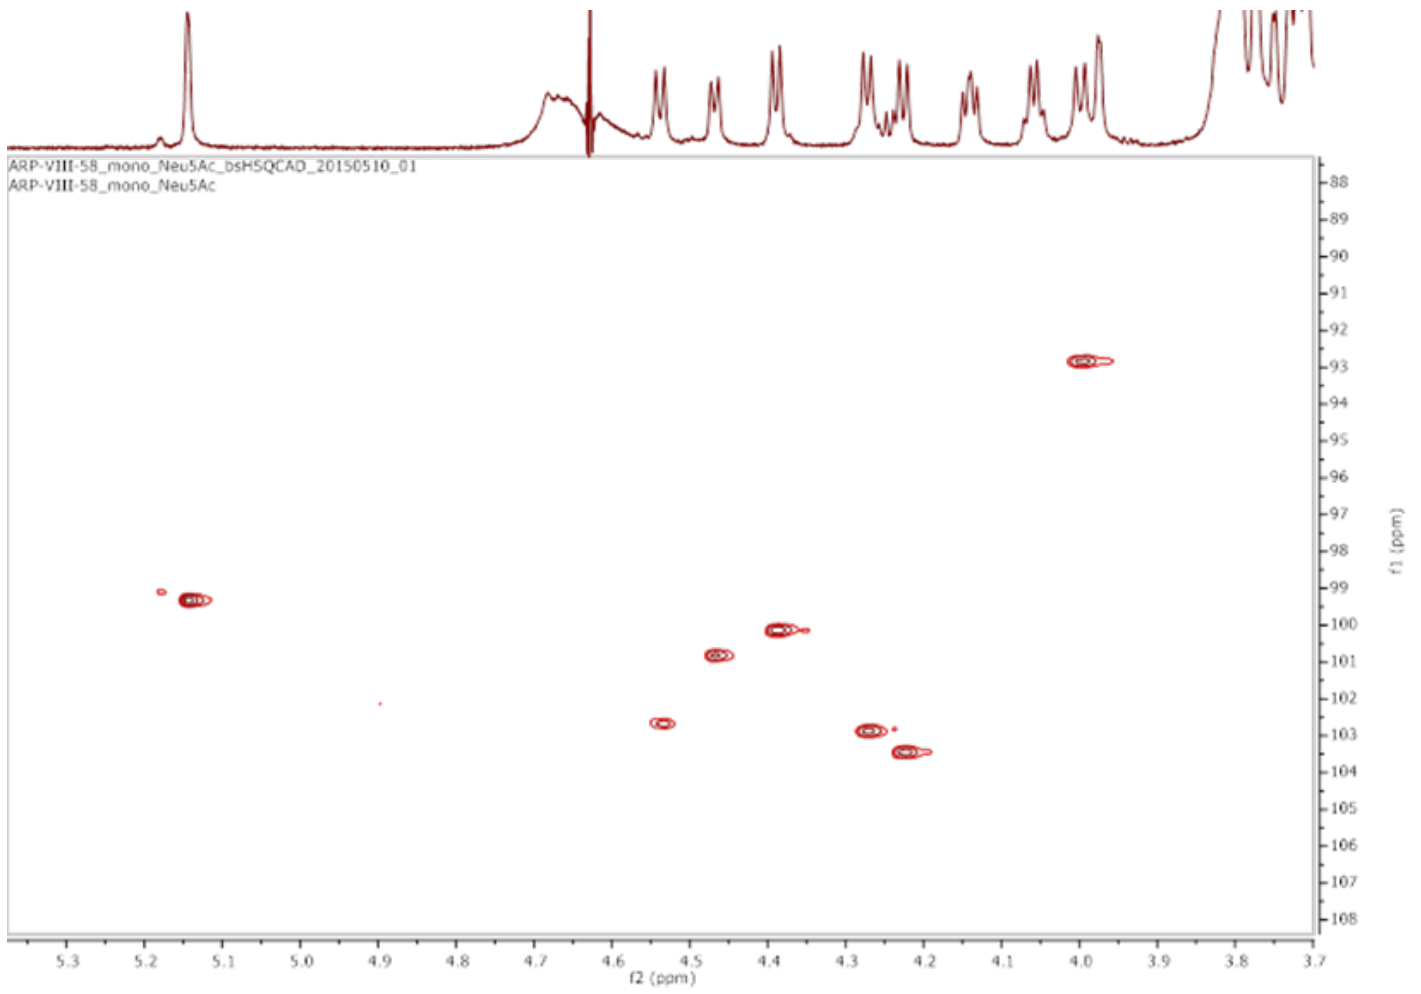

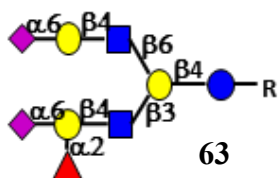

$^1\text{H}$  (600 MHz,  $\text{D}_2\text{O}$ ):  $\delta$  (ppm)

|                                     | H1                            | H2   | H3                         | H4   | H5                 | H6   | H7  | H8  | H9           | $\text{CH}_3$                 | NHAc                    |
|-------------------------------------|-------------------------------|------|----------------------------|------|--------------------|------|-----|-----|--------------|-------------------------------|-------------------------|
| <b>Glc</b>                          | 4.00<br>(d, $J = 9.1$ Hz, 1H) | 3.37 | 3.42                       | 3.43 | n/a <sup>[a]</sup> | n/a  | -   | -   | -            | -                             | -                       |
| <b>Gal</b>                          | 4.27<br>(d, $J = 8.0$ Hz, 1H) | 3.42 | 3.53                       | 3.98 | n/a                | n/a  | -   | -   | -            | -                             | -                       |
| <b>GlcNAc</b>                       | 4.46<br>(d, $J = 7.6$ Hz, 1H) | 3.56 | 3.43                       | 3.40 | n/a                | n/a  | -   | -   | -            | -                             | 1.95 - 1.82<br>(m, 12H) |
| <b>Gal(2)</b>                       | 4.35<br>(d, $J = 7.6$ Hz, 1H) | 3.52 | 3.64                       | 3.73 | n/a                | n/a  | -   | -   | -            | -                             | -                       |
| <b>GlcNAc(2)</b>                    | 4.54<br>(d, $J = 8.3$ Hz, 1H) | 3.63 | 3.58                       | 3.34 | n/a                | n/a  | -   | -   | -            | -                             | 1.95 - 1.82<br>(m, 12H) |
| <b>Gal(3)</b>                       | 4.22<br>(d, $J = 7.9$ Hz, 1H) | 3.36 | 3.48                       | 3.75 | n/a                | n/a  | -   | -   | -            | -                             | -                       |
| <b>Fuc(1)(<math>\alpha</math>2)</b> | 5.15<br>(d, $J = 3.2$ Hz, 1H) | 3.64 | n/a                        | n/a  | 4.04               | -    | -   | -   | -            | 1.06<br>(d, $J = 6.5$ Hz, 3H) | -                       |
| <b>Neu5Ac</b>                       | -                             | -    | 2.52 - eq.<br>1.55 - axial | 3.49 | 3.62               | 3.51 | n/a | n/a | 3.69<br>3.48 | -                             | 1.95 - 1.82<br>(m, 12H) |
| <b>Neu5Ac(2)</b>                    | -                             | -    | 2.52 - eq.<br>1.55 - axial | 3.49 | 3.62               | 3.51 | n/a | n/a | 3.69<br>3.48 | -                             | 1.95 - 1.82<br>(m, 12H) |

$^{13}\text{C}$  from BSHSQC (150 MHz,  $\text{D}_2\text{O}$ ):  $\delta$  (ppm)

|                                     | C1     |
|-------------------------------------|--------|
| <b>Glc</b>                          | 92.79  |
| <b>Gal</b>                          | 102.94 |
| <b>GlcNAc</b>                       | 100.81 |
| <b>Gal(2)</b>                       | 100.61 |
| <b>GlcNAc(2)</b>                    | 102.41 |
| <b>Gal(3)</b>                       | 103.48 |
| <b>Fuc(1)(<math>\alpha</math>2)</b> | 99.17  |

<sup>[a]</sup> Not assigned

<sup>[b]</sup> Not applicable

MALDI TOF-MS  $m/z$  calcd  $\text{C}_{89}\text{H}_{138}\text{N}_8\text{O}_{56}\text{Na}_3^{--}$  ( $\text{M} + 3\text{Na}$ )<sup>+</sup> exact 2283.7890, found 2283.2549.

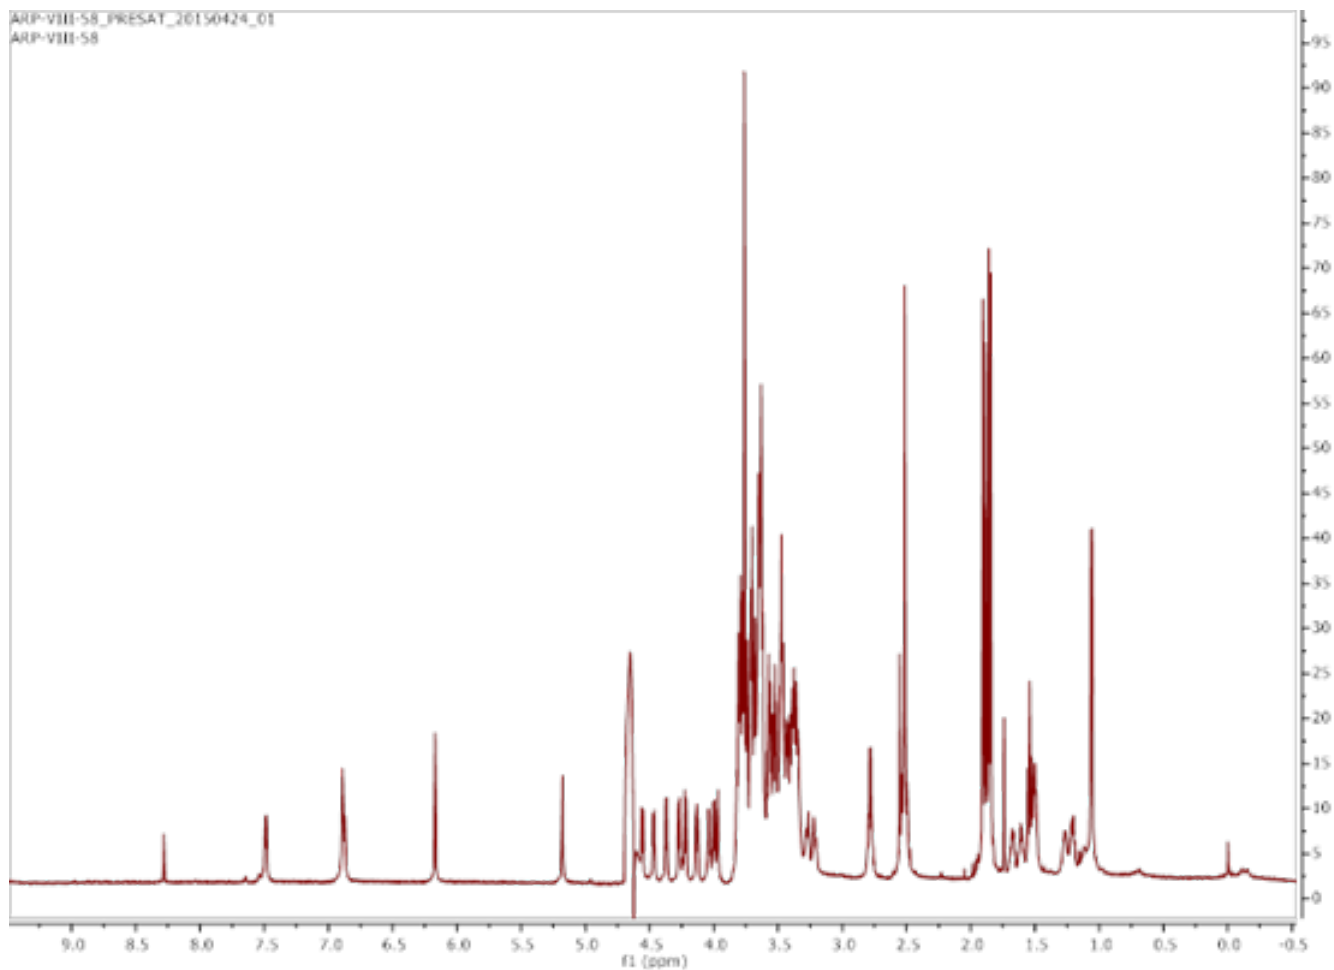

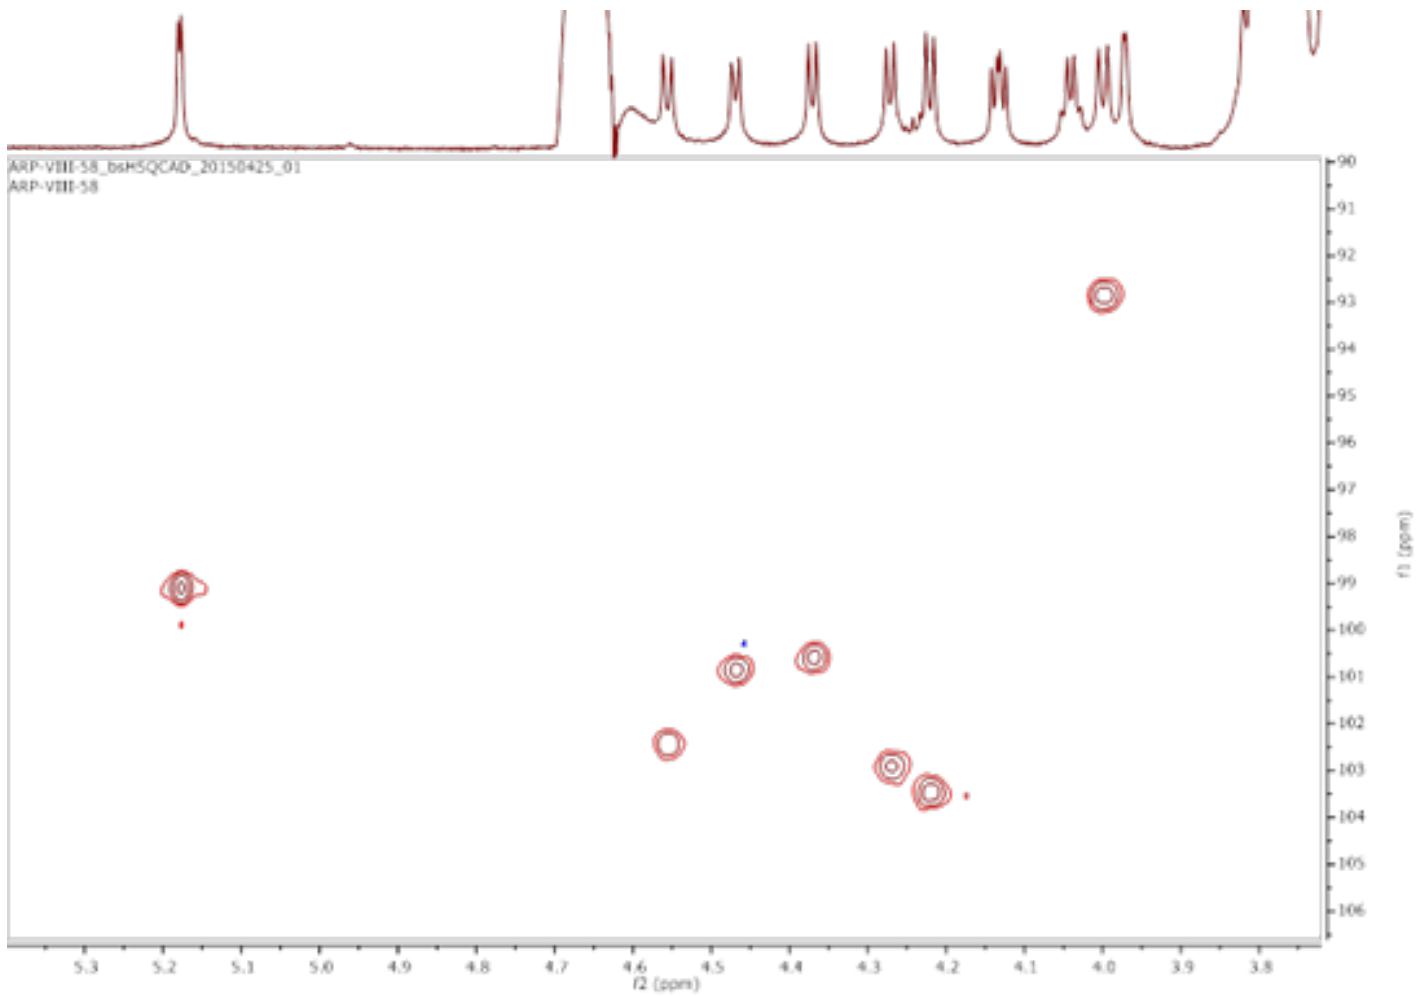



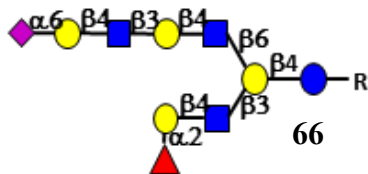

$^1\text{H}$  (600 MHz,  $\text{D}_2\text{O}$ ):  $\delta$  (ppm)

|                     | H1                            | H2   | H3                         | H4   | H5                 | H6   | H7               | H8  | H9           | $\text{CH}_3$                 | NHAc                    |
|---------------------|-------------------------------|------|----------------------------|------|--------------------|------|------------------|-----|--------------|-------------------------------|-------------------------|
| Glc                 | 4.00                          | 3.35 | 3.42                       | 3.47 | n/a <sup>[a]</sup> | n/a  | - <sup>[b]</sup> | -   | -            | -                             | -                       |
| Gal                 | 4.27                          | 3.42 | 3.55                       | 3.98 | n/a                | n/a  | -                | -   | -            | -                             | -                       |
| GlcNAc              | 4.55                          | 3.64 | 3.54                       | 3.31 | n/a                | n/a  | -                | -   | -            | -                             | 1.92 - 1.82<br>(m, 12H) |
| Gal(2)              | 4.38<br>(d, $J = 7.4$ Hz, 1H) | 3.52 | n/a                        | 3.71 | n/a                | n/a  | -                | -   | -            | -                             | -                       |
| GlcNAc(2)           | 4.44<br>(d, $J = 7.7$ Hz, 1H) | 3.56 | 3.53                       | 3.42 | n/a                | n/a  | -                | -   | -            | -                             | 1.92 - 1.82<br>(m, 12H) |
| Gal(3)              | 4.27                          | 3.43 | 3.55                       | 3.98 | n/a                | n/a  | -                | -   | -            | -                             | -                       |
| GlcNAc(3)           | 4.55                          | 3.64 | 3.50                       | 3.44 | n/a                | n/a  | -                | -   | -            | -                             | 1.92 - 1.82<br>(m, 12H) |
| Gal(4)              | 4.29                          | 3.37 | 3.51                       | 3.77 | n/a                | n/a  | -                | -   | -            | -                             | -                       |
| Fuc(1)( $\alpha$ 2) | 5.15                          | 3.64 | n/a                        | n/a  | 4.04               | -    | -                | -   | -            | 1.06<br>(d, $J = 6.1$ Hz, 3H) | -                       |
| Neu5Ac              | -                             | -    | 2.52 - eq.<br>1.55 - axial | 3.49 | 3.62               | 3.51 | n/a              | n/a | 3.69<br>3.48 | -                             | 1.92 - 1.82<br>(m, 12H) |

$^{13}\text{C}$  from BSHSQC (150 MHz,  $\text{D}_2\text{O}$ ):  $\delta$  (ppm)

|                     | C1     |
|---------------------|--------|
| Glc                 | 92.87  |
| Gal                 | 102.84 |
| GlcNAc              | 102.57 |
| Gal(2)              | 100.07 |
| GlcNAc(2)           | 100.91 |
| Gal(3)              | 102.84 |
| GlcNAc(3)           | 102.57 |
| Gal(4)              | 103.41 |
| Fuc(1)( $\alpha$ 2) | 99.29  |

<sup>[a]</sup> Not assigned

<sup>[b]</sup> Not applicable

MALDI TOF-MS  $m/z$  calcd  $\text{C}_{89}\text{H}_{138}\text{N}_8\text{O}_{56}^-$  ( $\text{M} - \text{H}$ )<sup>-</sup> exact 2289.8648, found 2289.3418.

ARP-VIII-68\_mono\_Neu5Ac\_PRESAT\_20150515\_01  
ARP-VIII-68\_mono\_Neu5Ac

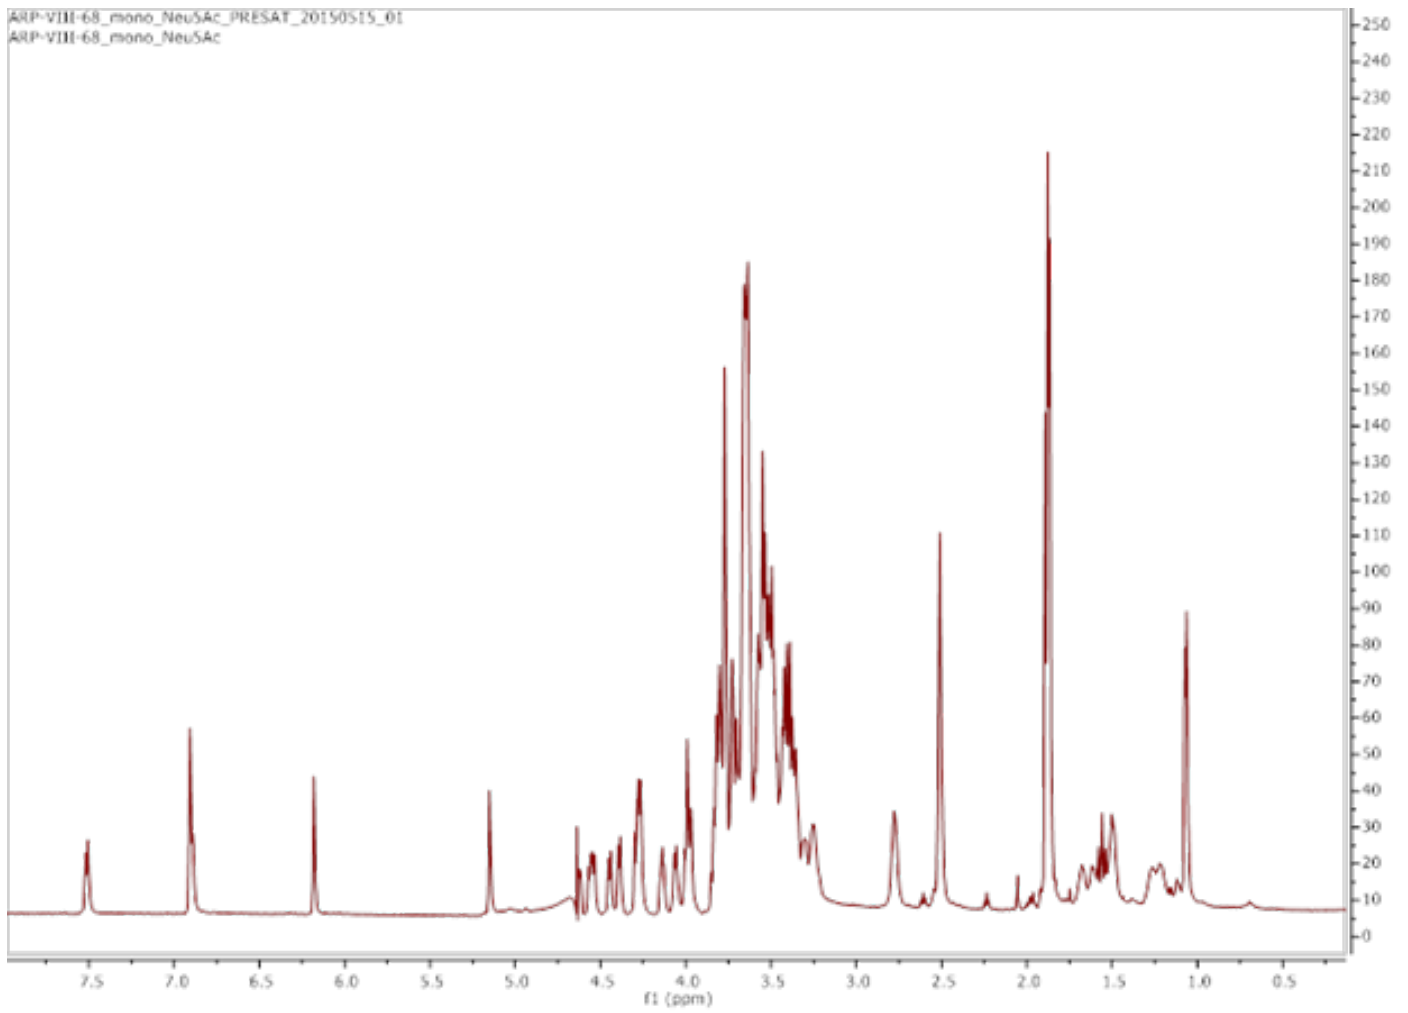

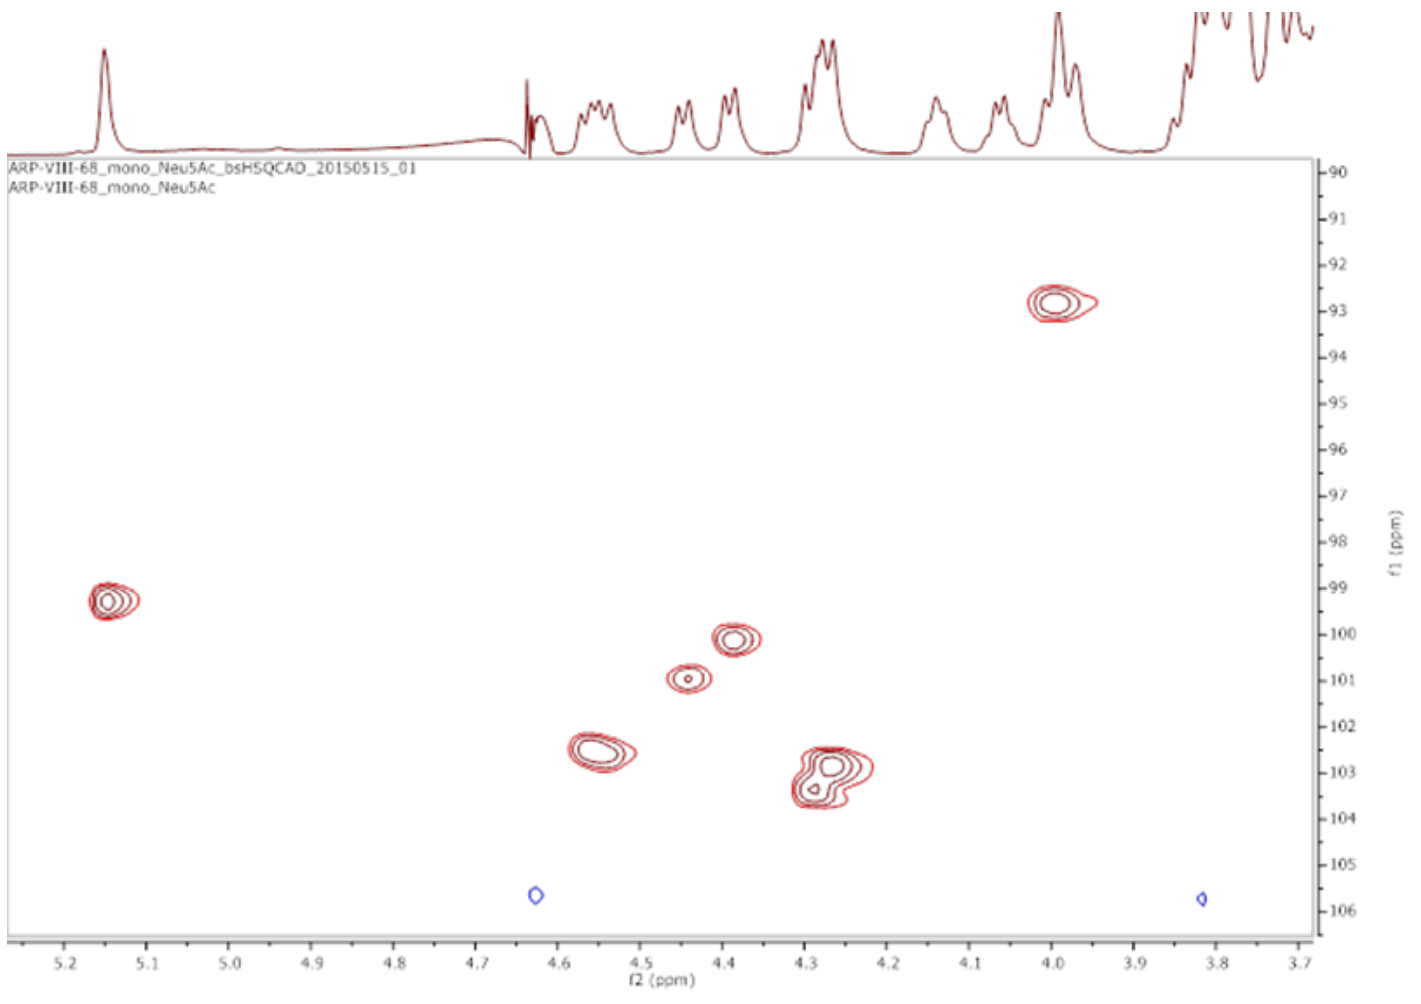

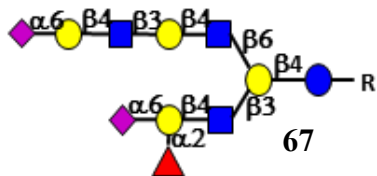

$^1\text{H}$  (600 MHz,  $\text{D}_2\text{O}$ ):  $\delta$  (ppm)

|                     | H1                            | H2   | H3                         | H4   | H5                 | H6   | H7               | H8  | H9           | $\text{CH}_3$                 | NHAc                    |
|---------------------|-------------------------------|------|----------------------------|------|--------------------|------|------------------|-----|--------------|-------------------------------|-------------------------|
| Glc                 | 4.00                          | 3.35 | 3.42                       | 3.49 | n/a <sup>[a]</sup> | n/a  | - <sup>[b]</sup> | -   | -            | -                             | -                       |
| Gal                 | 4.27                          | 3.42 | 3.55                       | 3.98 | n/a                | n/a  | -                | -   | -            | -                             | -                       |
| GlcNAc              | 4.55<br>(d, $J = 7.9$ Hz, 2H) | 3.64 | 3.58                       | 3.35 | n/a                | n/a  | -                | -   | -            | -                             | 1.92 - 1.82<br>(m, 15H) |
| Gal(2)              | 4.38<br>(d, $J = 7.6$ Hz, 1H) | 3.52 | 3.65                       | 3.73 | n/a                | n/a  | -                | -   | -            | -                             | -                       |
| GlcNAc(2)           | 4.44<br>(d, $J = 7.7$ Hz, 1H) | 3.56 | 3.50                       | 3.42 | n/a                | n/a  | -                | -   | -            | -                             | 1.92 - 1.82<br>(m, 15H) |
| Gal(3)              | 4.27                          | 3.43 | 3.55                       | 3.98 | n/a                | n/a  | -                | -   | -            | -                             | -                       |
| GlcNAc(3)           | 4.55<br>(d, $J = 7.9$ Hz, 2H) | 3.64 | 3.50                       | 3.44 | n/a                | n/a  | -                | -   | -            | -                             | 1.92 - 1.82<br>(m, 15H) |
| Gal(4)              | 4.29                          | 3.37 | 3.51                       | 3.77 | n/a                | n/a  | -                | -   | -            | -                             | -                       |
| Fuc(1)( $\alpha$ 2) | 5.19                          | 3.65 | n/a                        | n/a  | 4.04               | -    | -                | -   | -            | 1.06<br>(d, $J = 6.5$ Hz, 3H) | -                       |
| Neu5Ac              | -                             | -    | 2.52 - eq.<br>1.55 - axial | 3.49 | 3.62               | 3.51 | n/a              | n/a | 3.69<br>3.48 | -                             | 1.92 - 1.82<br>(m, 15H) |
| Neu5Ac(2)           | -                             | -    | 2.52 - eq.<br>1.55 - axial | 3.49 | 3.62               | 3.51 | n/a              | n/a | 3.69<br>3.48 | -                             | 1.92 - 1.82<br>(m, 15H) |

$^{13}\text{C}$  from BSHSQC (150 MHz,  $\text{D}_2\text{O}$ ):  $\delta$  (ppm)

|                     | C1     |
|---------------------|--------|
| Glc                 | 92.90  |
| Gal                 | 102.84 |
| GlcNAc              | 102.49 |
| Gal(2)              | 100.49 |
| GlcNAc(2)           | 100.96 |
| Gal(3)              | 102.84 |
| GlcNAc(3)           | 102.49 |
| Gal(4)              | 103.47 |
| Fuc(1)( $\alpha$ 2) | 99.04  |

<sup>[a]</sup> Not assigned

<sup>[b]</sup> Not applicable

MALDI TOF-MS  $m/z$  calcd  $\text{C}_{103}\text{H}_{161}\text{N}_9\text{O}_{66}\text{Na}^-$  ( $\text{M} - \text{H}$ )<sup>-</sup> exact 2602.9427, found 2602.4346.

ARP-VIII-68\_Bis\_Neu5Ac\_PRESAT\_20150515\_01  
ARP-VIII-68\_Bis\_Neu5Ac

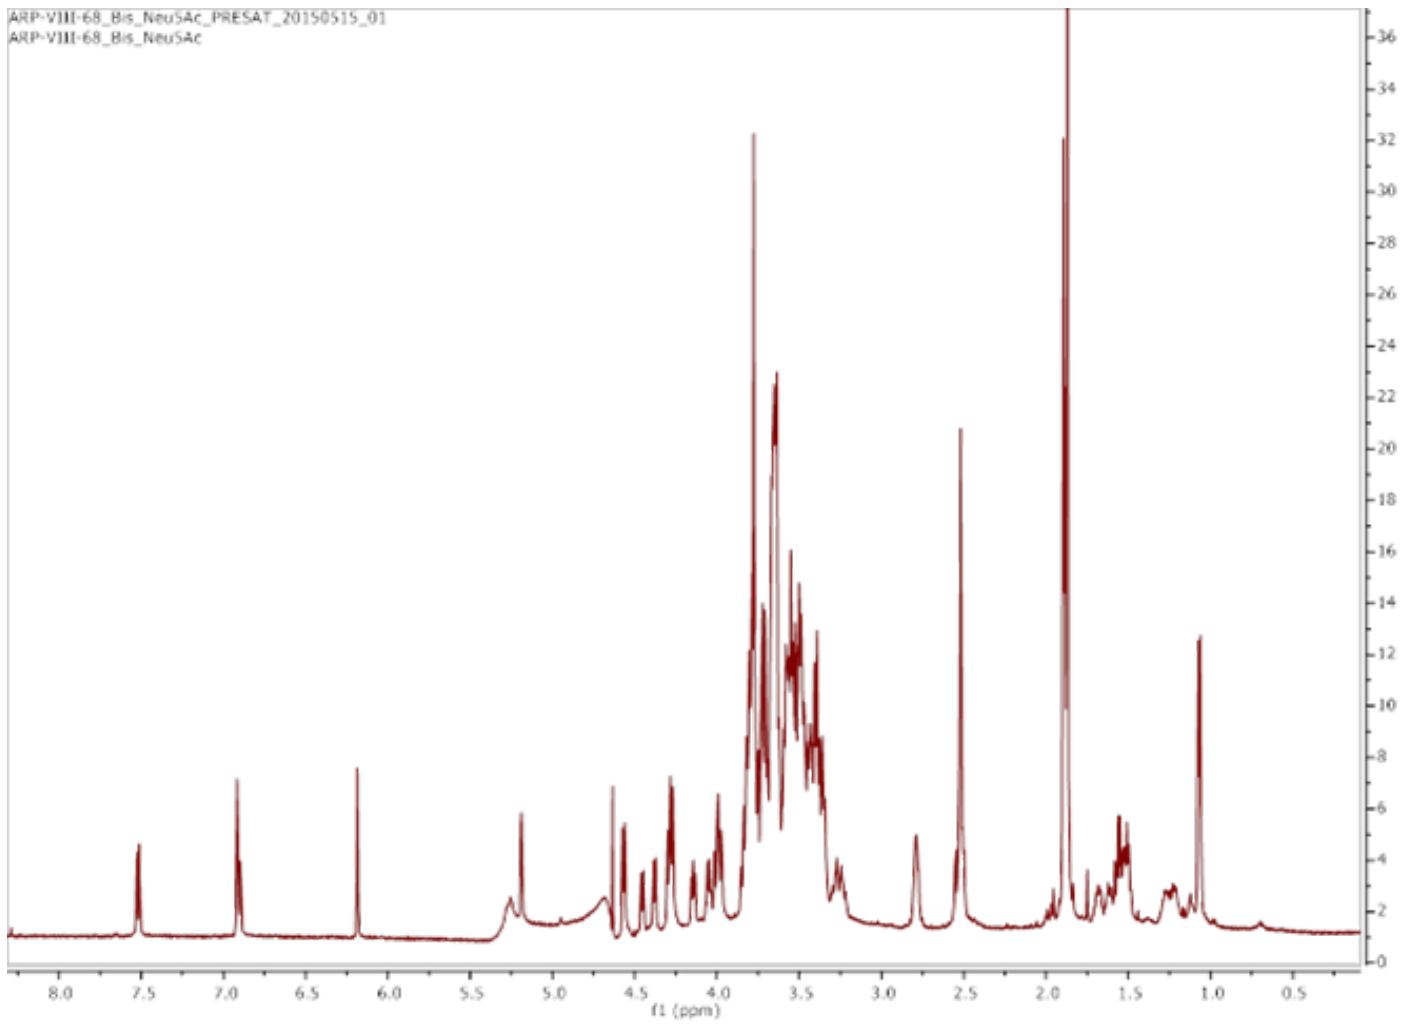

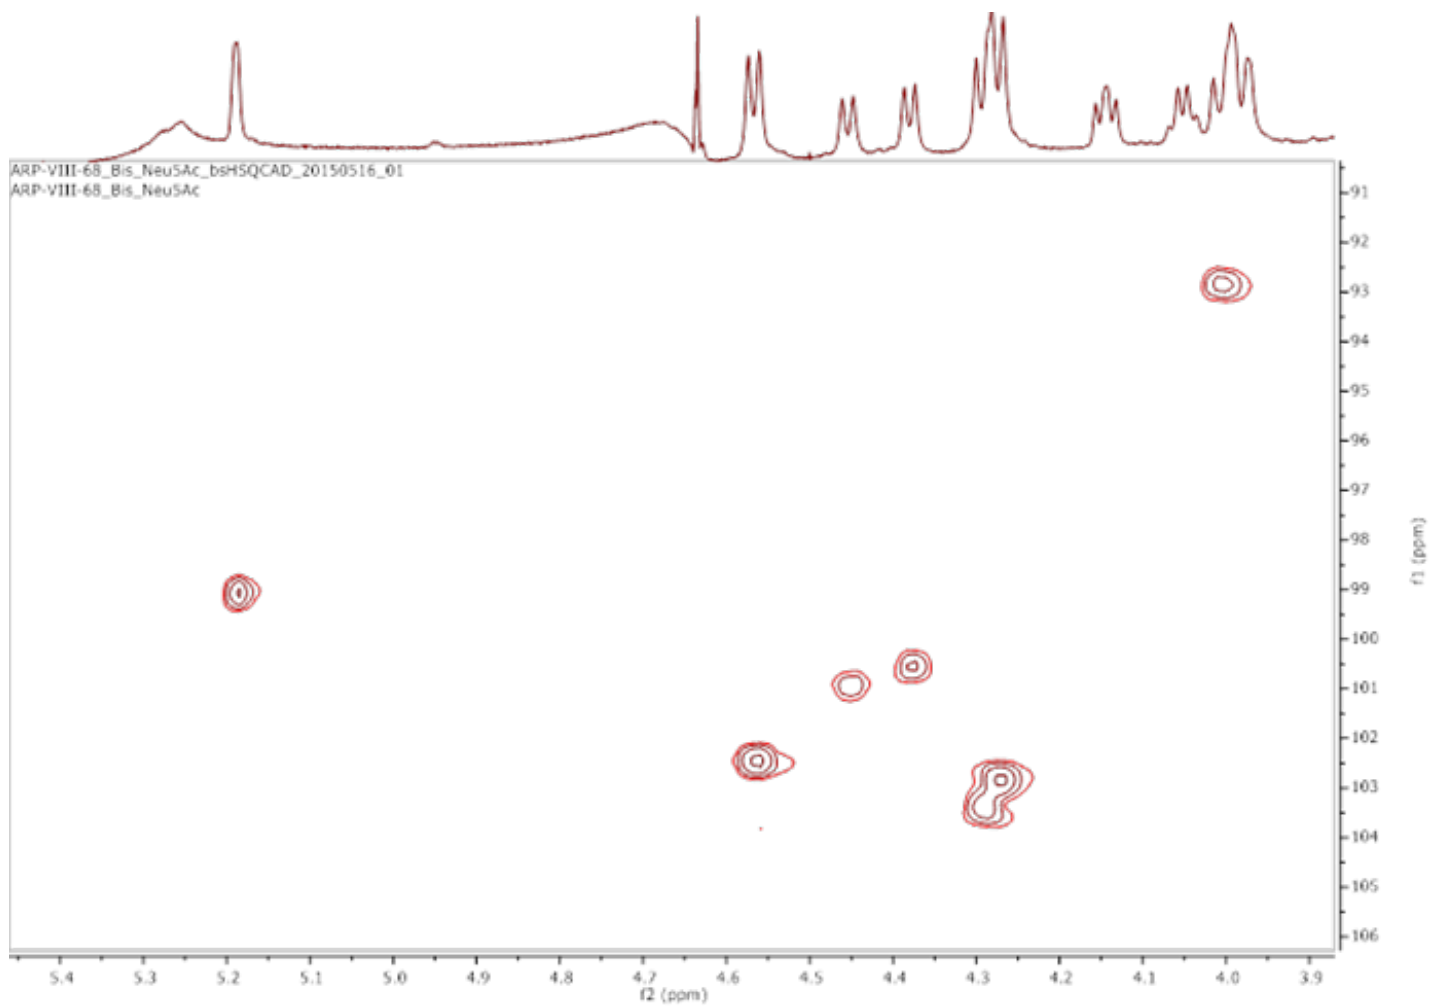

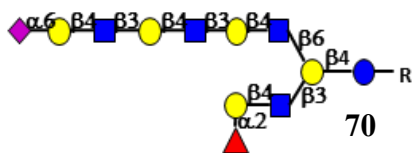

$^1\text{H}$  (600 MHz,  $\text{D}_2\text{O}$ ):  $\delta$  (ppm)

|                          | H1                            | H2   | H3                         | H4   | H5                 | H6   | H7               | H8  | H9           | $\text{CH}_3$                 | NHAc                    |
|--------------------------|-------------------------------|------|----------------------------|------|--------------------|------|------------------|-----|--------------|-------------------------------|-------------------------|
| Glc                      | 4.00                          | 3.35 | 3.42                       | 3.49 | n/a <sup>[a]</sup> | n/a  | - <sup>[b]</sup> | -   | -            | -                             | -                       |
| Gal                      | 4.27                          | 3.44 | 3.55                       | 3.98 | n/a                | n/a  | -                | -   | -            | -                             | -                       |
| GlcNAc                   | 4.55                          | 3.64 | 3.58                       | 3.43 | n/a                | n/a  | -                | -   | -            | -                             | 1.92 - 1.85<br>(m, 15H) |
| Gal(2)                   | 4.40<br>(d, $J = 7.5$ Hz, 1H) | 3.52 | 3.65                       | 3.73 | n/a                | n/a  | -                | -   | -            | -                             | -                       |
| GlcNAc(2)                | 4.46<br>(d, $J = 7.7$ Hz, 1H) | 3.59 | 3.53                       | 3.44 | n/a                | n/a  | -                | -   | -            | -                             | 1.92 - 1.85<br>(m, 15H) |
| Gal(3)                   | 4.27                          | 3.43 | 3.55                       | 3.98 | n/a                | n/a  | -                | -   | -            | -                             | -                       |
| GlcNAc(3)                | 4.55                          | 3.64 | 3.54                       | 3.32 | n/a                | n/a  | -                | -   | -            | -                             | 1.92 - 1.85<br>(m, 15H) |
| Gal(4)                   | 4.32                          | 3.44 | 3.58                       | 4.01 | n/a                | n/a  | -                | -   | -            | -                             | -                       |
| GlcNAc(4)                | 4.58<br>(d, $J = 7.8$ Hz, 1H) | 3.66 | 3.51                       | 3.46 | n/a                | n/a  | -                | -   | -            | -                             | 1.92 - 1.85<br>(m, 15H) |
| Gal(5)                   | 4.32                          | 3.39 | 3.52                       | 3.78 | n/a                | n/a  | -                | -   | -            | -                             | -                       |
| Fuc(1)<br>( $\alpha 2$ ) | 5.19                          | 3.65 | n/a                        | n/a  | 4.08               | -    | -                | -   | -            | 1.08<br>(d, $J = 6.4$ Hz, 3H) | -                       |
| Neu5Ac                   | -                             | -    | 2.52 - eq.<br>1.55 - axial | 3.49 | 3.62               | 3.51 | n/a              | n/a | 3.69<br>3.48 | -                             | 1.92 - 1.82<br>(m, 15H) |

$^{13}\text{C}$  from BSHSQC (150 MHz,  $\text{D}_2\text{O}$ ):  $\delta$  (ppm)

|                      | C1     |
|----------------------|--------|
| Glc                  | 92.79  |
| Gal                  | 102.84 |
| GlcNAc               | 102.62 |
| Gal(2)               | 100.04 |
| GlcNAc(2)            | 100.93 |
| Gal(3)               | 102.84 |
| GlcNAc(3)            | 102.62 |
| Gal(4)               | 102.79 |
| GlcNAc(4)            | 102.54 |
| Gal(5)               | 103.31 |
| Fuc(1)( $\alpha 2$ ) | 99.18  |

<sup>[a]</sup> Not assigned

<sup>[b]</sup> Not applicable

MALDI TOF-MS  $m/z$  calcd  $\text{C}_{106}\text{H}_{168}\text{N}_9\text{O}_{68}\text{Na}_2^{--}$  ( $\text{M} + 2\text{Na}$ )<sup>+</sup> exact 2700.9766, found 2700.2908.

ARP-VIII-97\_mono\_neu5ac\_PRESAT\_20150716\_01  
ARP-VIII-97\_mono\_neu5ac

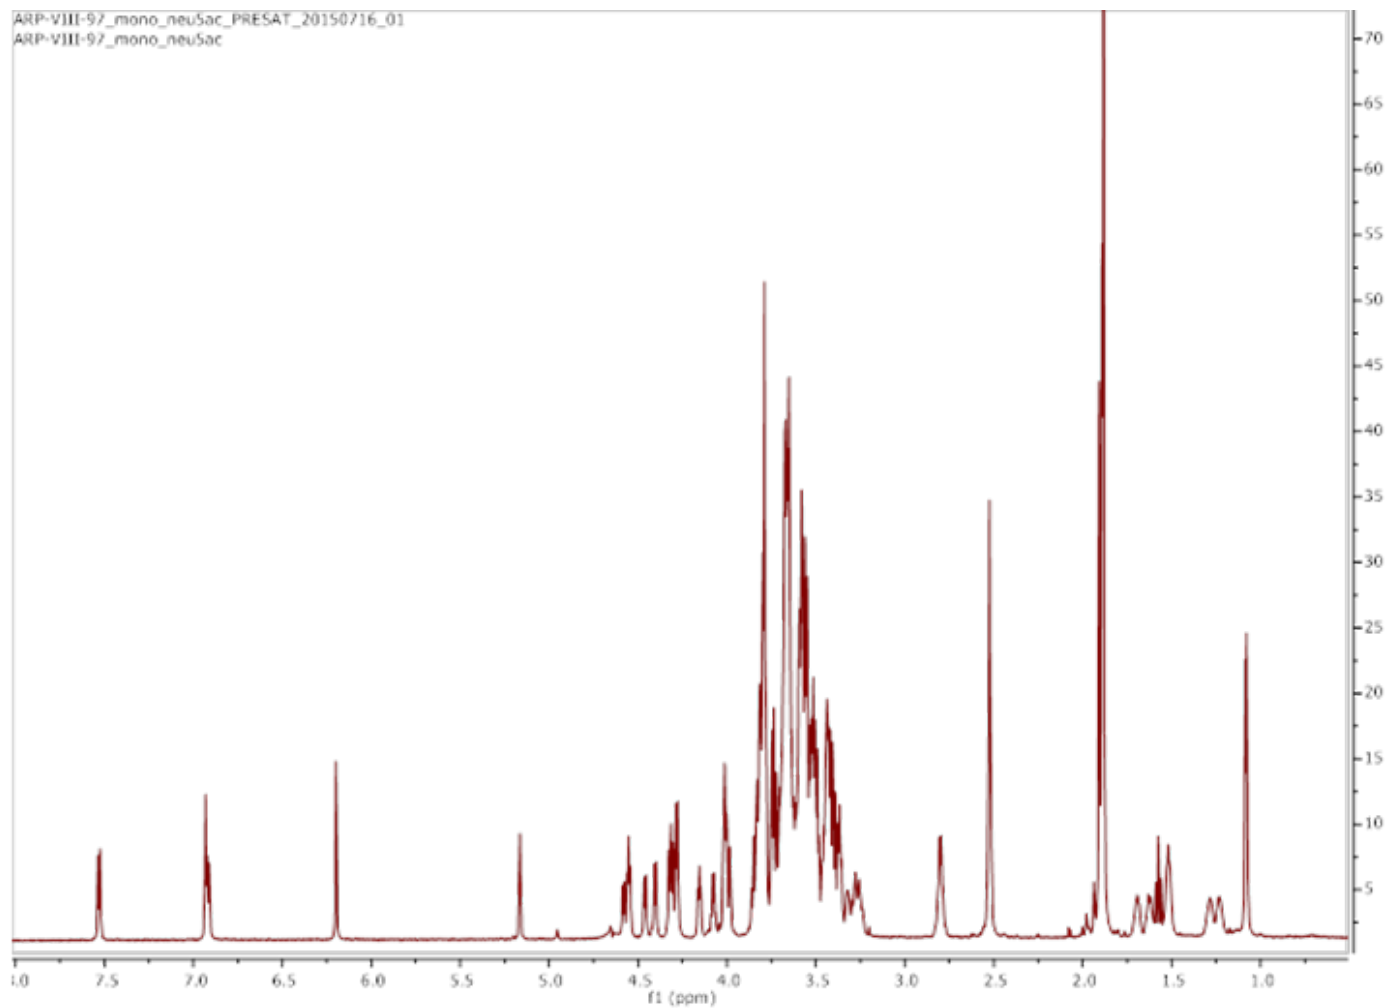



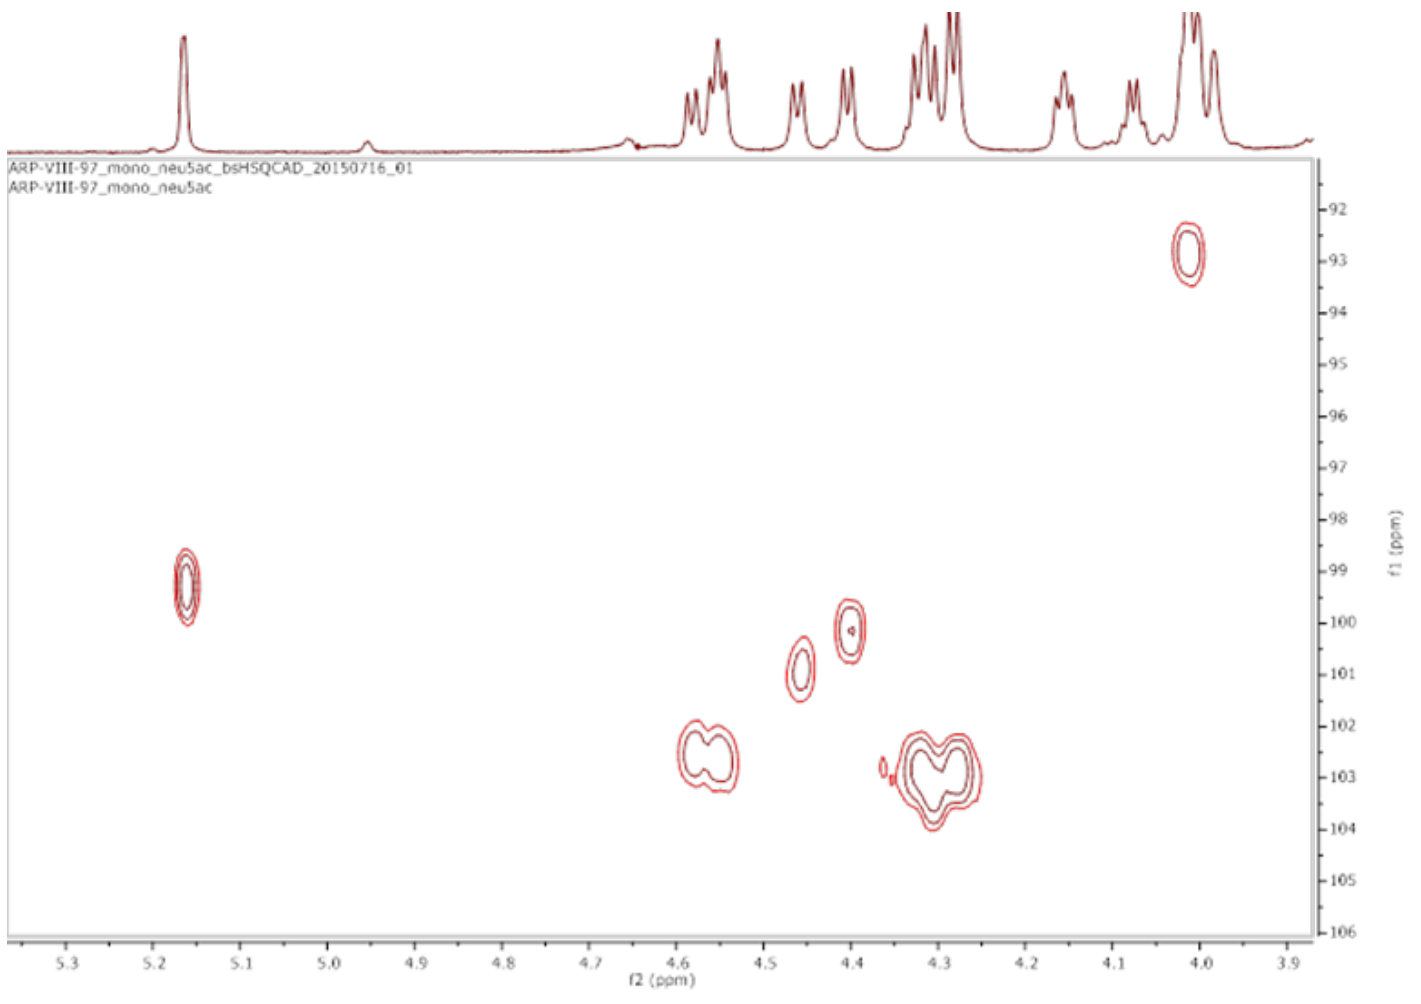

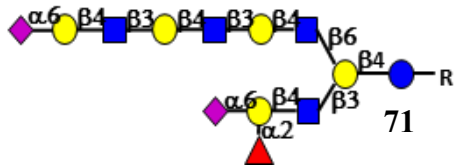

$^1\text{H}$  (600 MHz,  $\text{D}_2\text{O}$ ):  $\delta$  (ppm)

|                      | H1                            | H2   | H3                         | H4   | H5                 | H6   | H7               | H8  | H9           | $\text{CH}_3$                 | NHAc                    |
|----------------------|-------------------------------|------|----------------------------|------|--------------------|------|------------------|-----|--------------|-------------------------------|-------------------------|
| Glc                  | 4.00                          | 3.35 | 3.42                       | 3.49 | n/a <sup>[a]</sup> | n/a  | - <sup>[b]</sup> | -   | -            | -                             | -                       |
| Gal                  | 4.27                          | 3.44 | 3.55                       | 4.00 | n/a                | n/a  | -                | -   | -            | -                             | -                       |
| GlcNAc               | 4.55<br>(d, $J = 8.1$ Hz, 1H) | 3.64 | 3.58                       | 3.43 | n/a                | n/a  | -                | -   | -            | -                             | 1.92 - 1.85<br>(m, 18H) |
| Gal(2)               | 4.40<br>(d, $J = 7.4$ Hz, 1H) | 3.54 | 3.73                       | 3.77 | n/a                | n/a  | -                | -   | -            | -                             | -                       |
| GlcNAc(2)            | 4.46                          | 3.59 | 3.53                       | 3.44 | n/a                | n/a  | -                | -   | -            | -                             | 1.92 - 1.85<br>(m, 18H) |
| Gal(3)               | 4.27                          | 3.43 | 3.55                       | 4.00 | n/a                | n/a  | -                | -   | -            | -                             | -                       |
| GlcNAc(3)            | 4.58                          | 3.64 | 3.59                       | 3.36 | n/a                | n/a  | -                | -   | -            | -                             | 1.92 - 1.85<br>(m, 18H) |
| Gal(4)               | 4.32                          | 3.44 | 3.58                       | 4.01 | n/a                | n/a  | -                | -   | -            | -                             | -                       |
| GlcNAc(4)            | 4.58                          | 3.66 | 3.51                       | 3.46 | n/a                | n/a  | -                | -   | -            | -                             | 1.92 - 1.85<br>(m, 18H) |
| Gal(5)               | 4.32                          | 3.39 | 3.52                       | 3.78 | n/a                | n/a  | -                | -   | -            | -                             | -                       |
| Fuc(1)( $\alpha 2$ ) | 5.19<br>(d, $J = 2.7$ Hz, 1H) | 3.65 | n/a                        | n/a  | 4.08               | -    | -                | -   | -            | 1.08<br>(d, $J = 6.5$ Hz, 3H) | -                       |
| Neu5Ac(1)            | -                             | -    | 2.52 - eq.<br>1.55 - axial | 3.49 | 3.62               | 3.51 | n/a              | n/a | 3.69<br>3.48 | -                             | 1.92 - 1.82<br>(m, 18H) |
| Neu5Ac(2)            | -                             | -    | 2.52 - eq.<br>1.55 - axial | 3.49 | 3.62               | 3.51 | n/a              | n/a | 3.69<br>3.48 | -                             | 1.92 - 1.82<br>(m, 18H) |

$^{13}\text{C}$  from BSHSQC (150 MHz,  $\text{D}_2\text{O}$ ):  $\delta$  (ppm)

|                      | C1     |
|----------------------|--------|
| Glc                  | 92.90  |
| Gal                  | 102.84 |
| GlcNAc               | 103.17 |
| Gal(2)               | 100.66 |
| GlcNAc(2)            | 101.32 |
| Gal(3)               | 102.85 |
| GlcNAc(3)            | 102.42 |
| Gal(4)               | 102.93 |
| GlcNAc(4)            | 102.42 |
| Gal(5)               | 103.29 |
| Fuc(1)( $\alpha 2$ ) | 99.06  |

<sup>[a]</sup> Not assigned

<sup>[b]</sup> Not applicable

MALDI TOF-MS  $m/z$  calcd  $\text{C}_{106}\text{H}_{168}\text{N}_9\text{O}_{68}\text{Na}_2^{--}$  ( $\text{M} + 2\text{Na}$ )<sup>+</sup> exact 2700.9766, found 2700.2908.

ARP-VIII-97\_bis\_Neu5Ac\_PRESAT\_20150716\_01  
ARP-VIII-97\_bis\_Neu5Ac

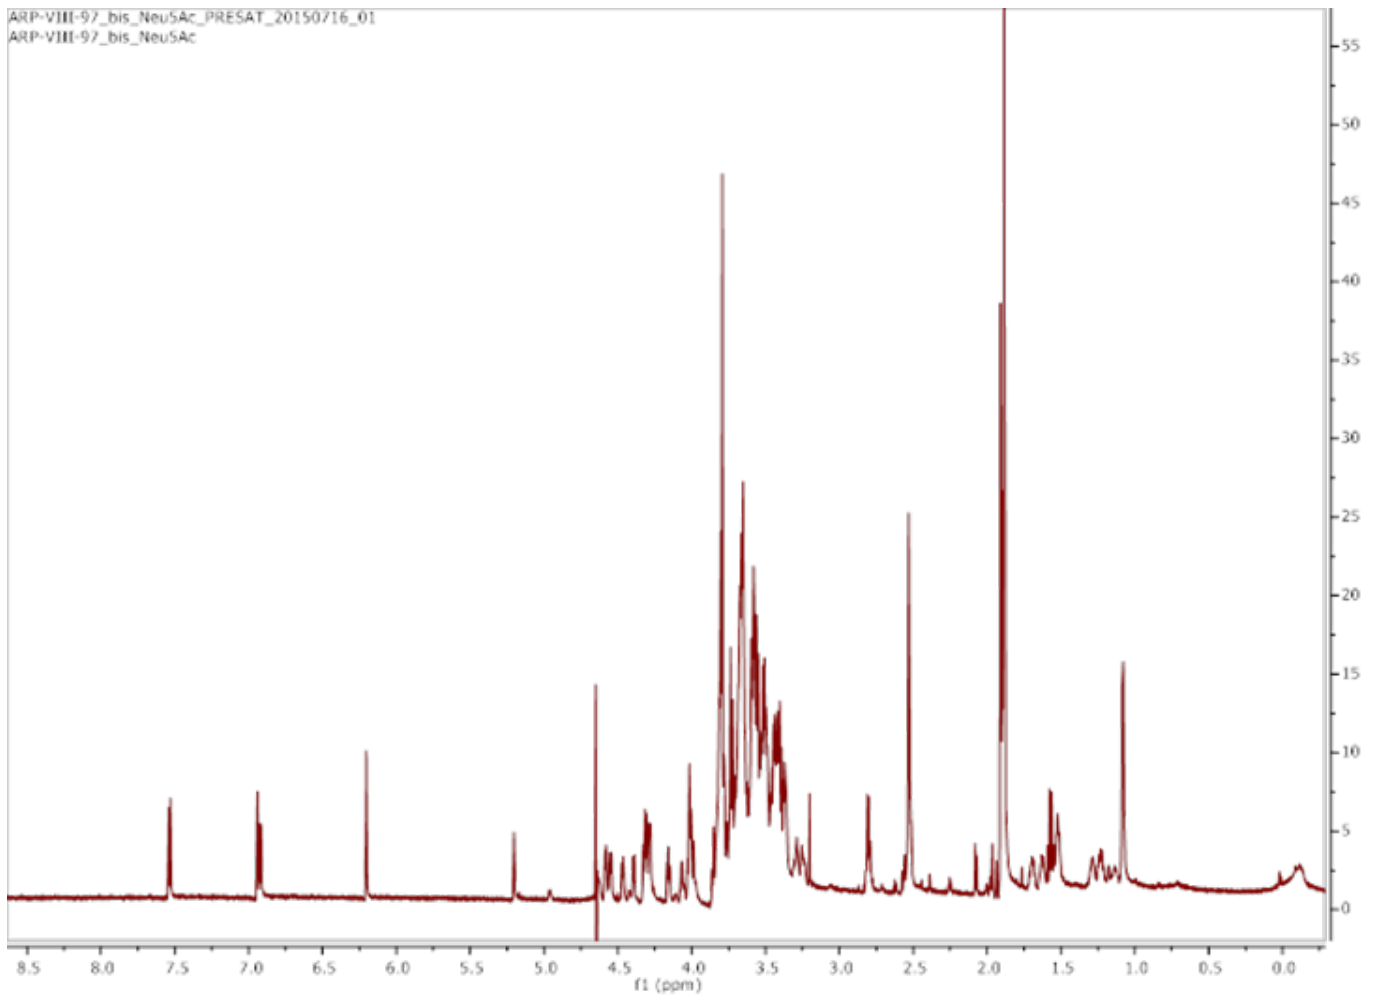

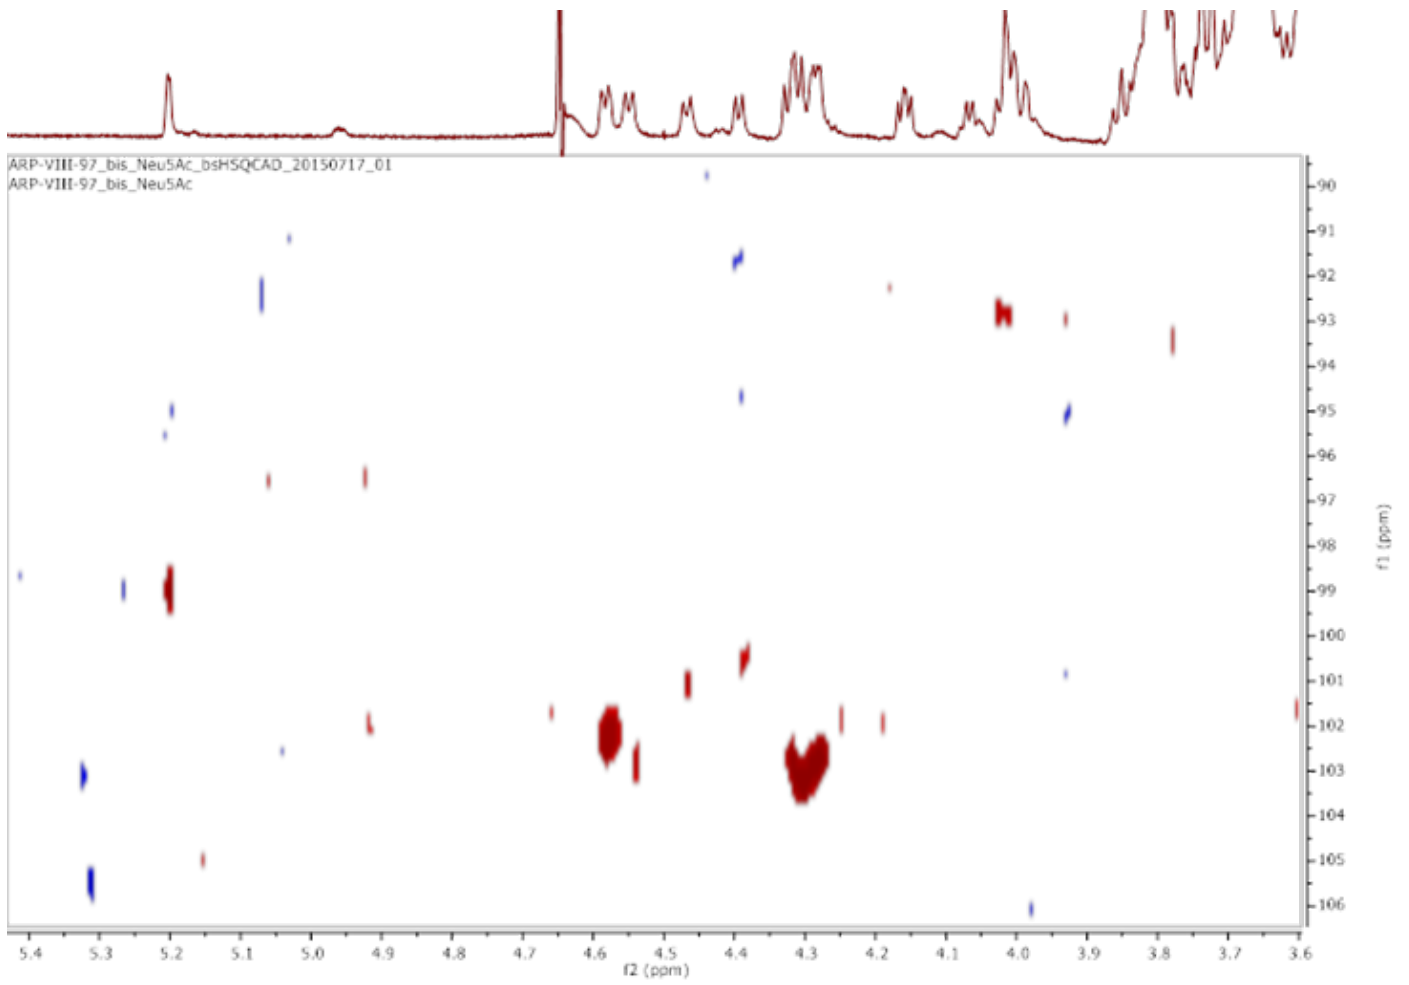

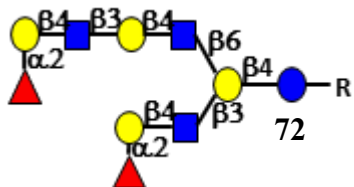

<sup>1</sup>H (800 MHz, D<sub>2</sub>O): δ (ppm)

|            | H1                          | H2   | H3   | H4   | H5                 | H6  | CH <sub>3</sub> | NHAc                   |
|------------|-----------------------------|------|------|------|--------------------|-----|-----------------|------------------------|
| Glc        | 4.00                        | 3.35 | 3.39 | 3.47 | n/a <sup>[a]</sup> | n/a | -               | -                      |
| Gal        | 4.26<br>(d, J = 6.0 Hz, 2H) | 3.42 | 3.53 | 3.98 | n/a                | n/a | -               | -                      |
| GlcNAc     | 4.53                        | 3.64 | 3.53 | 3.31 | n/a                | n/a | -               | 1.91 - 1.81<br>(m, 9H) |
| Gal(2)     | 4.39<br>(d, J = 7.6 Hz, 2H) | 3.50 | 3.64 | 3.72 | n/a                | n/a | -               | -                      |
| GlcNAc(2)  | 4.45<br>(d, J = 7.9 Hz, 1H) | 3.56 | 3.51 | 3.43 | n/a                | n/a | -               | 1.91 - 1.81<br>(m, 9H) |
| Gal(3)     | 4.26<br>(d, J = 6.0 Hz, 2H) | 3.42 | 3.53 | 3.98 | n/a                | n/a | -               | -                      |
| GlcNAc(3)  | 4.53                        | 3.64 | 3.53 | 3.31 | n/a                | n/a | -               | 1.91-1.81<br>(m, 9H)   |
| Gal(4)     | 4.39<br>(d, J = 7.6 Hz, 2H) | 3.50 | 3.64 | 3.72 | n/a                | n/a | -               | -                      |
| Fuc(1)(α2) | 5.14                        | 3.62 | n/a  | n/a  | 4.05               | -   | 1.06            | -                      |
| Fuc(2)(α2) | 5.14                        | 3.62 | n/a  | n/a  | 4.05               | -   | 1.06            | -                      |

<sup>13</sup>C from BSHSQC (200 MHz, D<sub>2</sub>O): δ (ppm)

|            | C1     |
|------------|--------|
| Glc        | 92.86  |
| Gal        | 102.91 |
| GlcNAc     | 102.59 |
| Gal(2)     | 100.13 |
| GlcNAc(2)  | 101.05 |
| Gal(3)     | 102.91 |
| GlcNAc(3)  | 102.59 |
| Gal(4)     | 100.13 |
| Fuc(1)(α2) | 99.42  |
| Fuc(2)(α2) | 99.42  |

<sup>[a]</sup> Not assigned

<sup>[b]</sup> Not applicable

MALDI TOF-MS *m/z* calcd C<sub>87</sub>H<sub>139</sub>N<sub>7</sub>O<sub>54</sub>Na<sup>-</sup> (M + Na)<sup>+</sup> exact 2168.8244, found 2168.2302.

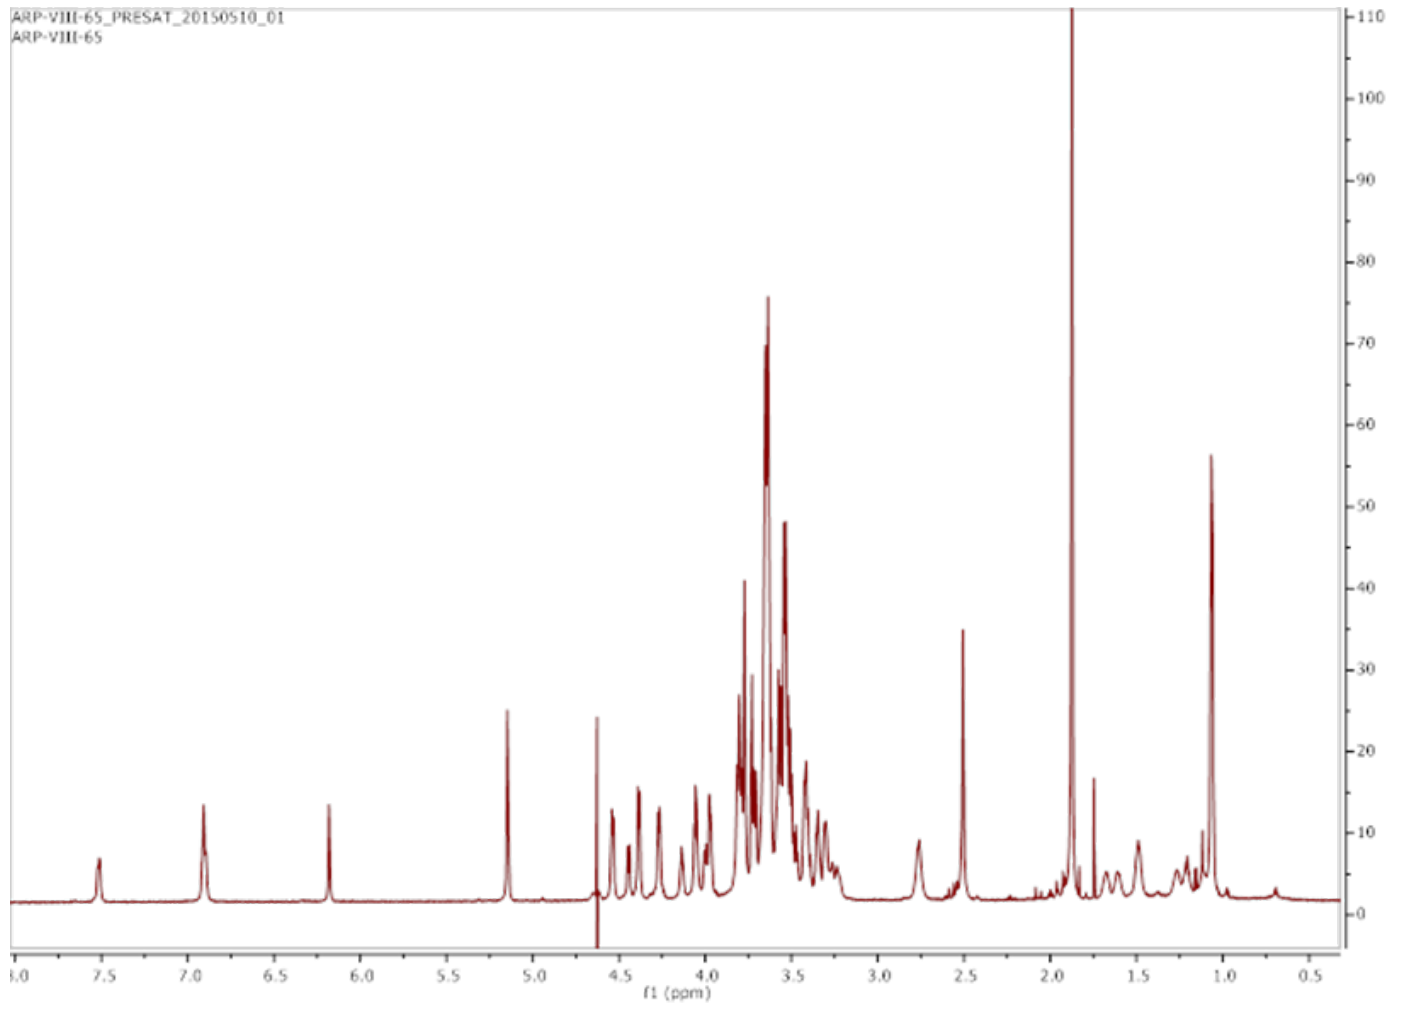

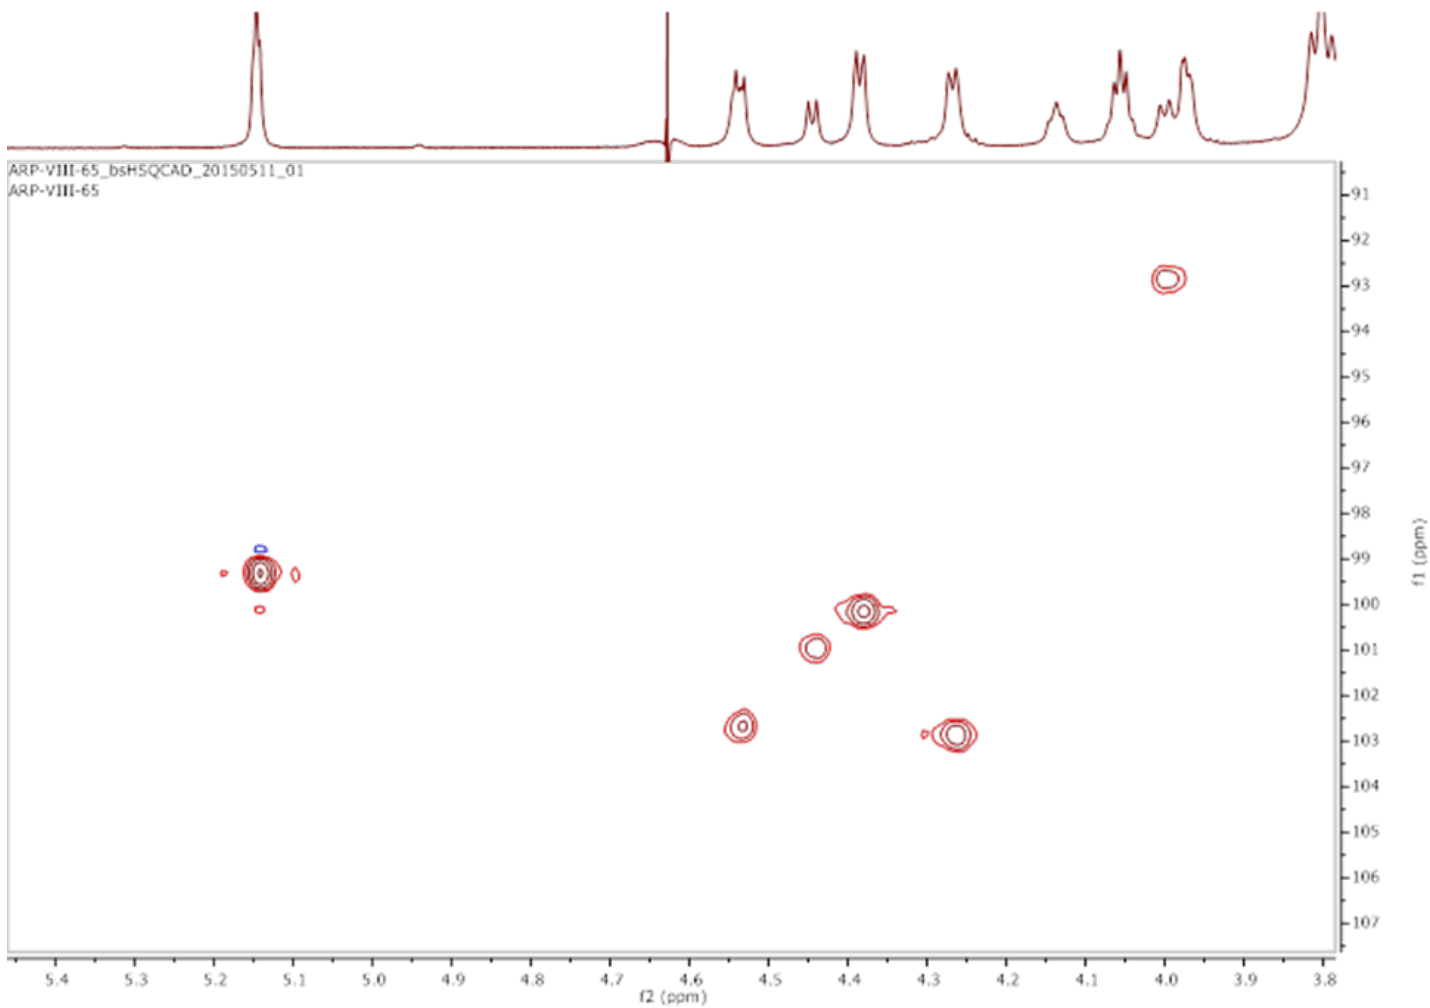

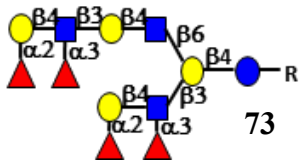

$^1\text{H}$  (600 MHz,  $\text{D}_2\text{O}$ ):  $\delta$  (ppm)

|                     | H1                            | H2   | H3   | H4   | H5                 | H6  | $\text{CH}_3$ | NHAc                   |
|---------------------|-------------------------------|------|------|------|--------------------|-----|---------------|------------------------|
| Glc                 | 4.00                          | 3.37 | 3.43 | 3.50 | n/a <sup>[a]</sup> | n/a | -             | -                      |
| Gal                 | 4.26                          | 3.42 | 3.55 | 3.98 | n/a                | n/a | -             | -                      |
| GlcNAc              | 4.55                          | 3.81 | 3.71 | 3.31 | n/a                | n/a | -             | 1.91 - 1.81<br>(m, 9H) |
| Gal(2)              | 4.34<br>(d, $J = 7.1$ Hz, 2H) | 3.50 | n/a  | 3.72 | n/a                | n/a | -             | -                      |
| GlcNAc(2)           | 4.44<br>(d, $J = 6.8$ Hz, 1H) | 3.59 | 3.54 | 3.44 | n/a                | n/a | -             | 1.91 - 1.81<br>(m, 9H) |
| Gal(3)              | 4.26                          | 3.42 | 3.55 | 3.98 | n/a                | n/a | -             | -                      |
| GlcNAc(3)           | 4.55                          | 3.81 | 3.71 | 3.31 | n/a                | n/a | -             | 1.91-1.81<br>(m, 9H)   |
| Gal(4)              | 4.34<br>(d, $J = 7.1$ Hz, 2H) | 3.50 | n/a  | 3.72 | n/a                | n/a | -             | -                      |
| Fuc(1)( $\alpha$ 3) | 4.94                          | 3.56 | 3.77 | 3.67 | 4.74               | -   | 1.10          | -                      |
| Fuc(2)( $\alpha$ 2) | 5.11                          | 3.65 | n/a  | n/a  | 4.11               | -   | 1.12          | -                      |
| Fuc(3)( $\alpha$ 3) | 4.94                          | 3.56 | 3.77 | 3.67 | 4.74               | -   | 1.10          | -                      |
| Fuc(4)( $\alpha$ 2) | 5.11                          | 3.65 | n/a  | n/a  | 4.11               | -   | 1.12          | -                      |

$^{13}\text{C}$  from BSHSQC (150 MHz,  $\text{D}_2\text{O}$ ):  $\delta$  (ppm)

|                     | C1     |
|---------------------|--------|
| Glc                 | 92.82  |
| Gal                 | 102.95 |
| GlcNAc              | 102.39 |
| Gal(2)              | 100.13 |
| GlcNAc(2)           | 100.93 |
| Gal(3)              | 102.95 |
| GlcNAc(3)           | 102.39 |
| Gal(4)              | 100.13 |
| Fuc(1)( $\alpha$ 3) | 98.42  |
| Fuc(2)( $\alpha$ 2) | 99.36  |
| Fuc(3)( $\alpha$ 3) | 98.42  |
| Fuc(4)( $\alpha$ 2) | 99.36  |

<sup>[a]</sup> Not assigned

<sup>[b]</sup> Not applicable

MALDI TOF-MS  $m/z$  calcd  $\text{C}_{99}\text{H}_{159}\text{N}_7\text{O}_{62}\text{Na}^-$  ( $\text{M} + \text{Na}$ )<sup>+</sup> exact 2460.9402, found 2460.6555.



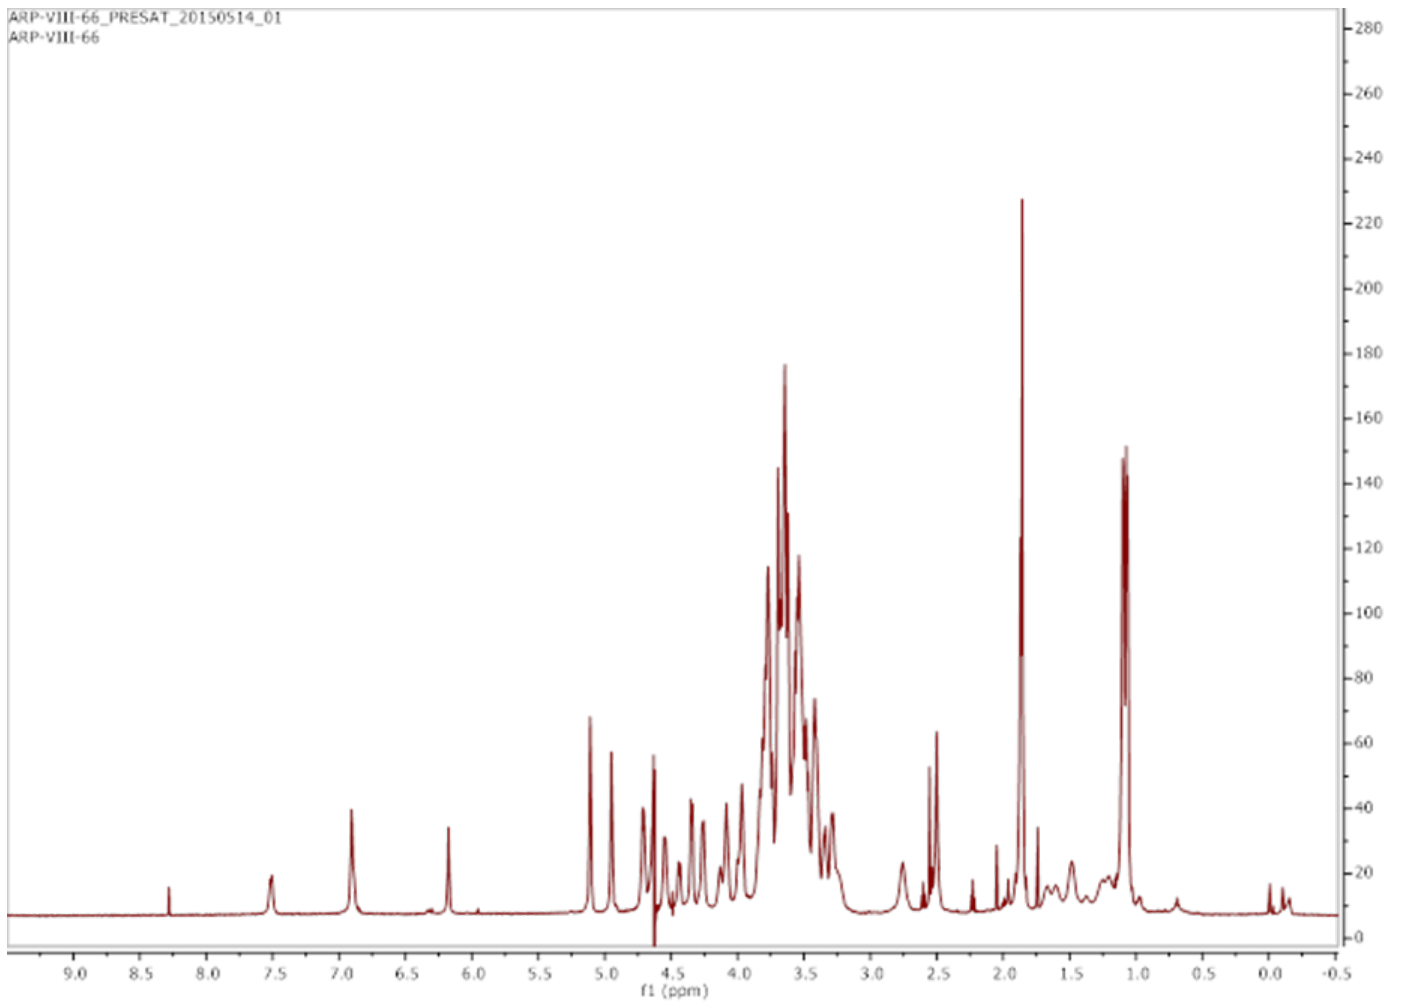

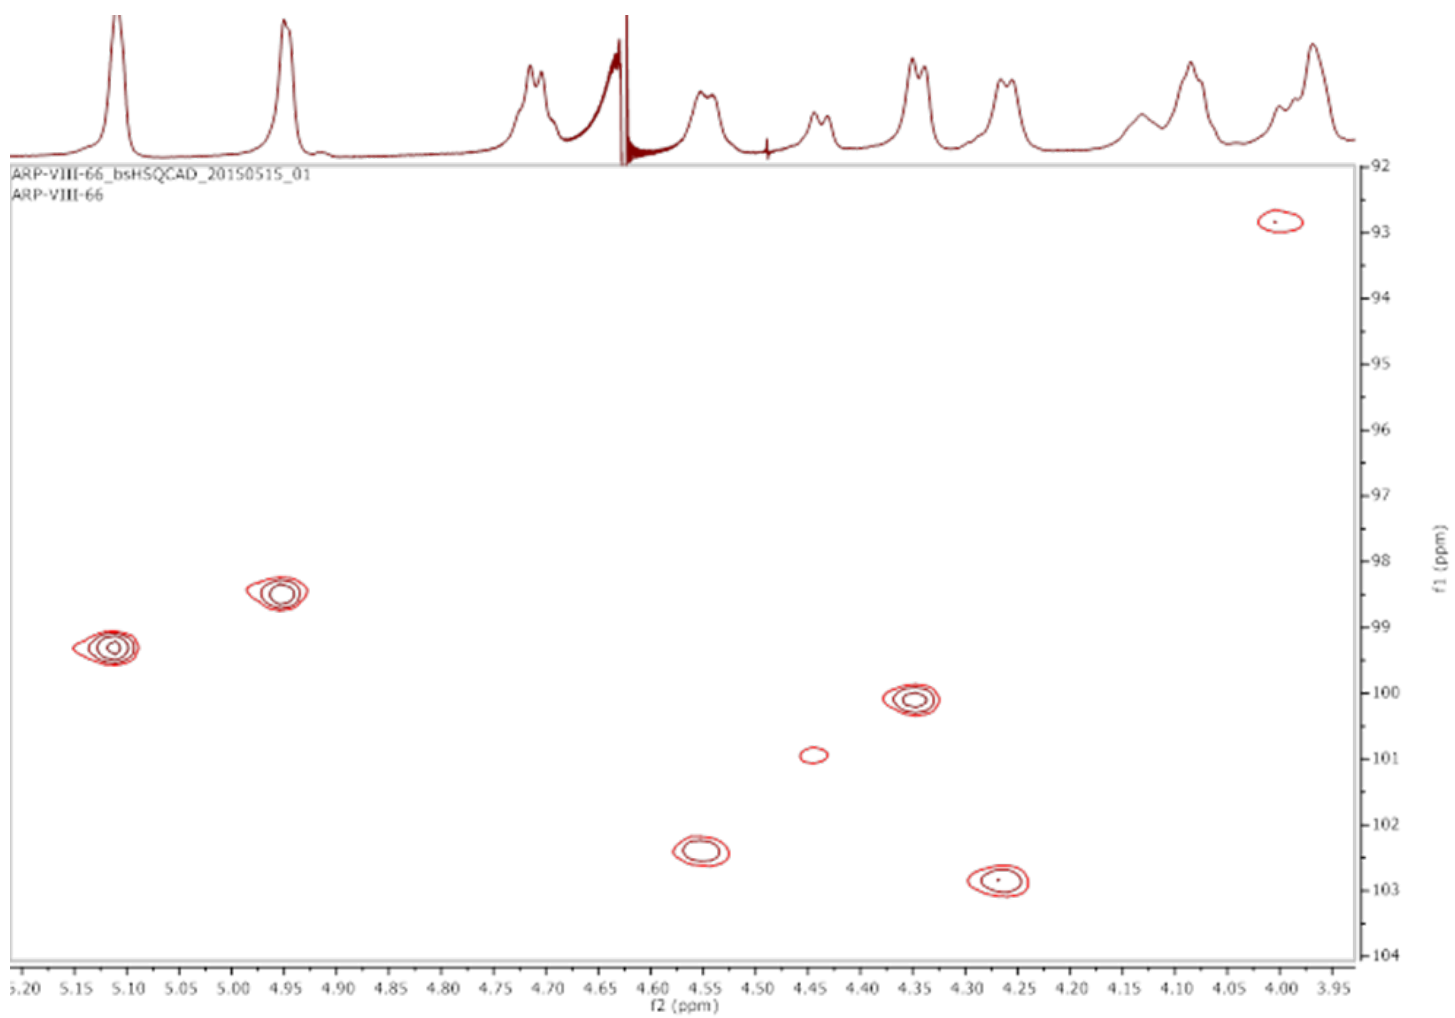

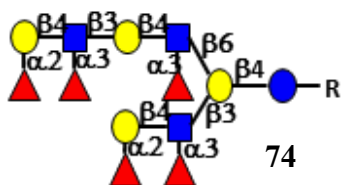

$^1\text{H}$  (600 MHz,  $\text{D}_2\text{O}$ ):  $\delta$  (ppm)

|                     | H1                            | H2   | H3   | H4   | H5                 | H6  | $\text{CH}_3$                 | NHAc                   |
|---------------------|-------------------------------|------|------|------|--------------------|-----|-------------------------------|------------------------|
| Glc                 | 4.00                          | 3.33 | 3.40 | 3.47 | n/a <sup>[a]</sup> | n/a | -                             | -                      |
| Gal                 | 4.26<br>(d, $J = 7.5$ Hz, 2H) | 3.42 | 3.52 | 3.96 | n/a                | n/a | -                             | -                      |
| GlcNAc              | 4.53                          | 3.79 | 3.68 | 3.29 | n/a                | n/a | -                             | 1.91 - 1.81<br>(m, 9H) |
| Gal(2)              | 4.34<br>(d, $J = 7.4$ Hz, 2H) | 3.48 | n/a  | 3.70 | n/a                | n/a | -                             | -                      |
| GlcNAc(2)           | 4.44<br>(d, $J = 5.4$ Hz, 1H) | 3.73 | n/a  | 3.42 | n/a                | n/a | -                             | 1.91 - 1.81<br>(m, 9H) |
| Gal(3)              | 4.26<br>(d, $J = 7.5$ Hz, 2H) | 3.34 | 3.51 | 3.92 | n/a                | n/a | -                             | -                      |
| GlcNAc(3)           | 4.53                          | 3.79 | 3.68 | 3.29 | n/a                | n/a | -                             | 1.91-1.81<br>(m, 9H)   |
| Gal(4)              | 4.34<br>(d, $J = 7.4$ Hz, 2H) | 3.48 | n/a  | 3.70 | n/a                | n/a | -                             | -                      |
| Fuc(1)( $\alpha$ 3) | 4.94                          | 3.54 | 3.75 | 3.64 | 4.70               | -   | 1.06                          | -                      |
| Fuc(2)( $\alpha$ 2) | 5.10                          | 3.63 | n/a  | n/a  | 4.11               | -   | 1.09                          | -                      |
| Fuc(3)( $\alpha$ 3) | 4.91                          | 3.52 | 3.71 | 3.63 | 4.70               | -   | 0.98<br>(d, $J = 5.9$ Hz, 3H) | -                      |
| Fuc(4)( $\alpha$ 3) | 4.94                          | 3.54 | 3.75 | 3.64 | 4.70               | -   | 1.06                          | -                      |
| Fuc(5)( $\alpha$ 2) | 5.10                          | 3.63 | n/a  | n/a  | 4.11               | -   | 1.09                          | -                      |

$^{13}\text{C}$  from BSHSQC (150 MHz,  $\text{D}_2\text{O}$ ):  $\delta$  (ppm)

|                     | C1     |
|---------------------|--------|
| Glc                 | 92.88  |
| Gal                 | 102.96 |
| GlcNAc              | 102.41 |
| Gal(2)              | 100.14 |
| GlcNAc(2)           | 100.74 |
| Gal(3)              | 101.62 |
| GlcNAc(3)           | 102.41 |
| Gal(4)              | 100.14 |
| Fuc(1)( $\alpha$ 3) | 98.47  |
| Fuc(2)( $\alpha$ 2) | 99.30  |
| Fuc(3)( $\alpha$ 3) | 98.66  |
| Fuc(4)( $\alpha$ 3) | 98.47  |
| Fuc(5)( $\alpha$ 2) | 99.30  |

<sup>[a]</sup> Not assigned

<sup>[b]</sup> Not applicable

MALDI TOF-MS  $m/z$  calcd  $\text{C}_{105}\text{H}_{169}\text{N}_7\text{O}_{66}\text{Na}^-$  ( $\text{M} + \text{Na}$ )<sup>+</sup> exact 2606.9981, found 2606.3372.

ARP-VIII-67\_PRESAT\_20150516\_01  
ARP-VIII-67

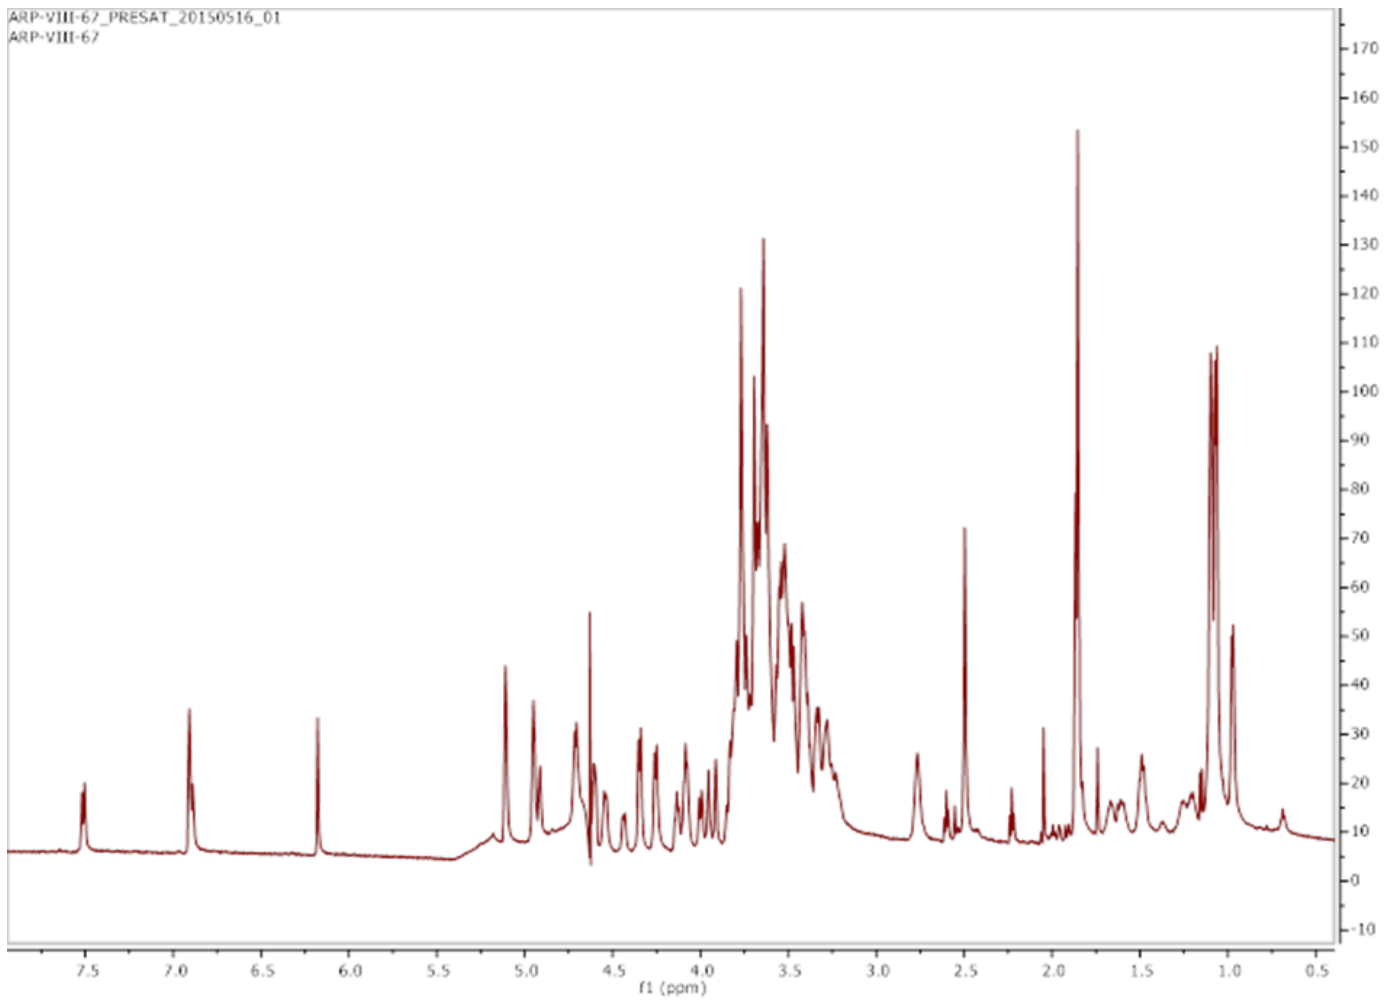

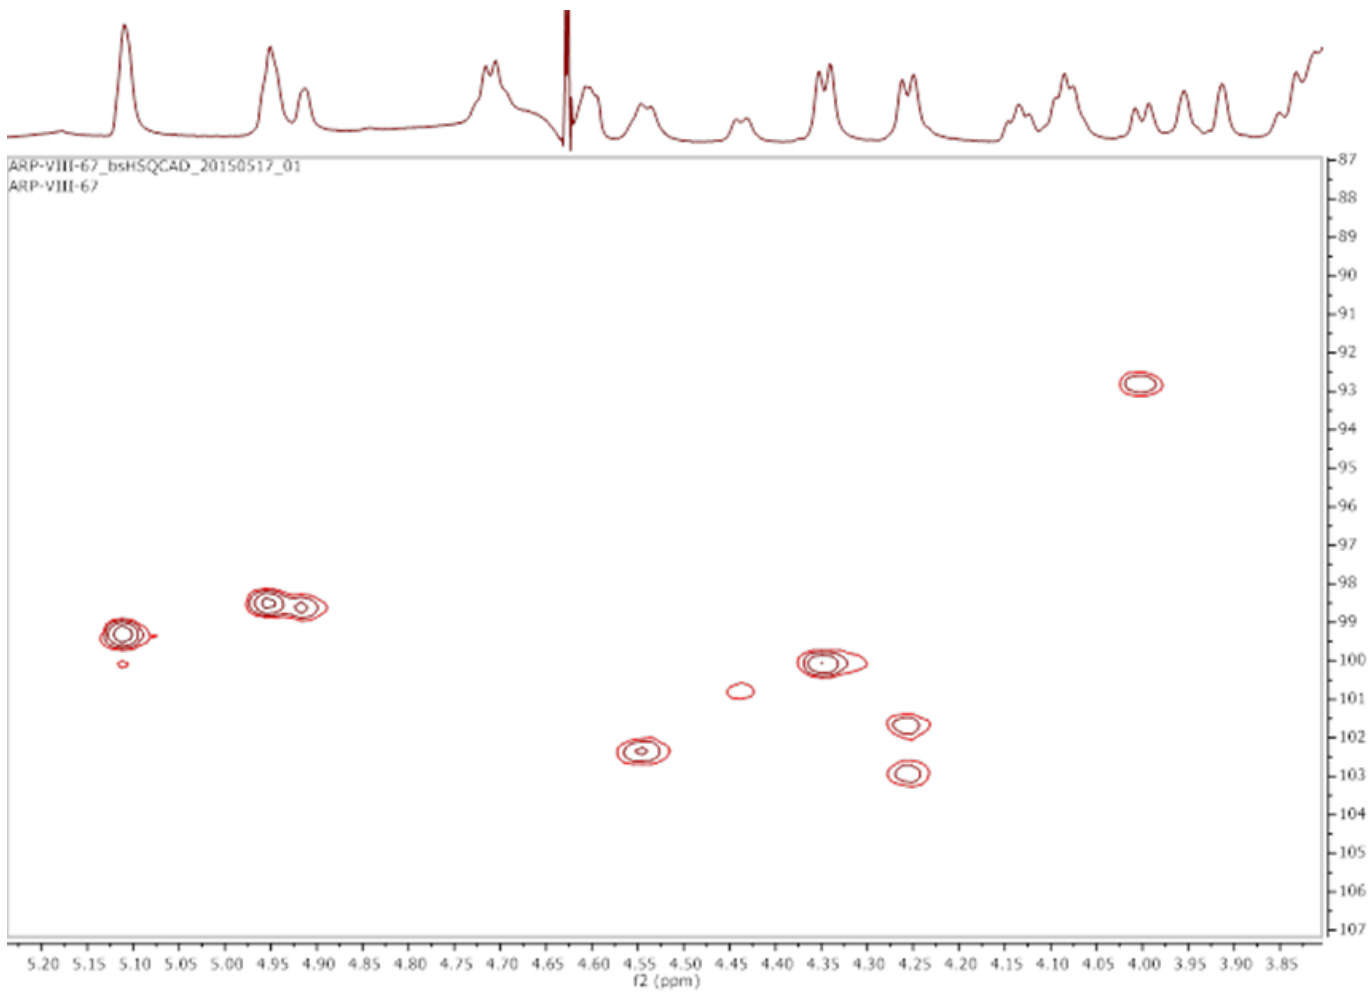

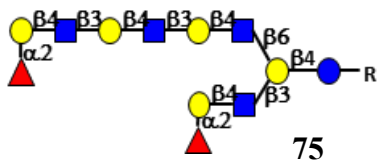

$^1\text{H}$  (600 MHz,  $\text{D}_2\text{O}$ ):  $\delta$  (ppm)

|                      | H1                            | H2   | H3   | H4   | H5                 | H6  | $\text{CH}_3$                 | NHAc                    |
|----------------------|-------------------------------|------|------|------|--------------------|-----|-------------------------------|-------------------------|
| Glc                  | 4.00                          | 3.35 | 3.43 | 3.49 | n/a <sup>[a]</sup> | n/a | -                             | -                       |
| Gal                  | 4.26                          | 3.42 | 3.56 | 3.99 | n/a                | n/a | -                             | -                       |
| GlcNAc               | 4.53<br>(d, $J = 9.0$ Hz, 1H) | 3.65 | 3.55 | 3.43 | n/a                | n/a | -                             | 1.91 - 1.81<br>(m, 12H) |
| Gal(2)               | 4.39<br>(d, $J = 7.6$ Hz, 2H) | 3.51 | 3.64 | 3.73 | n/a                | n/a | -                             | -                       |
| GlcNAc(2)            | 4.44                          | 3.57 | 3.51 | 3.43 | n/a                | n/a | -                             | 1.91 - 1.81<br>(m, 12H) |
| Gal(3)               | 4.26                          | 3.42 | 3.56 | 3.99 | n/a                | n/a | -                             | -                       |
| GlcNAc(3)            | 4.53                          | 3.65 | 3.55 | 3.43 | n/a                | n/a | -                             | 1.91-1.81<br>(m, 12H)   |
| Gal(4)               | 4.30                          | 3.43 | 3.58 | 3.99 | n/a                | n/a | -                             | -                       |
| GlcNAc(4)            | 4.53                          | 3.65 | 3.55 | 3.43 | n/a                | n/a | -                             | 1.91-1.81<br>(m, 12H)   |
| Gal(5)               | 4.39<br>(d, $J = 7.6$ Hz, 2H) | 3.51 | 3.64 | 3.73 | n/a                | n/a | -                             | -                       |
| Fuc(1)( $\alpha 2$ ) | 5.15                          | 3.65 | n/a  | n/a  | 4.04               | -   | 1.06<br>(d, $J = 6.0$ Hz, 6H) | -                       |
| Fuc(2)( $\alpha 2$ ) | 5.15                          | 3.65 | n/a  | n/a  | 4.04               | -   | 1.06<br>(d, $J = 6.0$ Hz, 6H) | -                       |

$^{13}\text{C}$  from BSHSQC (150 MHz,  $\text{D}_2\text{O}$ ):  $\delta$  (ppm)

|                      | C1     |
|----------------------|--------|
| Glc                  | 92.80  |
| Gal                  | 102.85 |
| GlcNAc               | 102.66 |
| Gal(2)               | 100.13 |
| GlcNAc(2)            | 100.97 |
| Gal(3)               | 102.85 |
| GlcNAc(3)            | 102.66 |
| Gal(4)               | 102.82 |
| GlcNAc(4)            | 102.66 |
| Gal(5)               | 100.13 |
| Fuc(1)( $\alpha 2$ ) | 99.36  |
| Fuc(2)( $\alpha 2$ ) | 99.36  |

<sup>[a]</sup> Not assigned

<sup>[b]</sup> Not applicable

MALDI TOF-MS  $m/z$  calcd  $\text{C}_{101}\text{H}_{162}\text{N}_8\text{O}_{64}\text{Na}^-$  ( $\text{M} + \text{Na}$ )<sup>+</sup> exact 2533.9566, found 2533.0864.

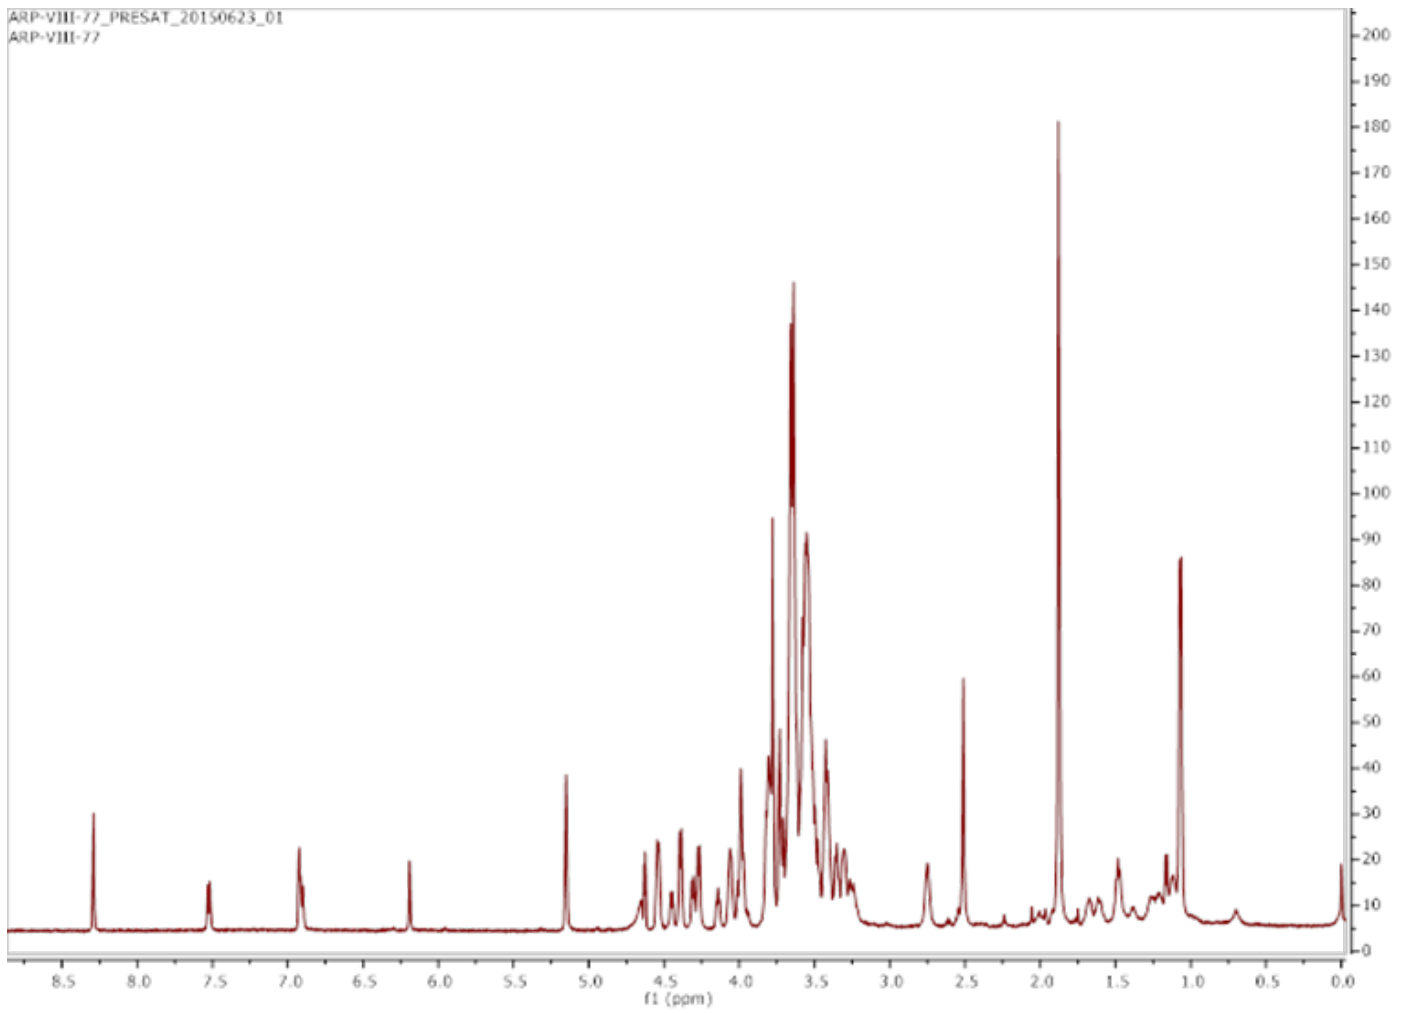

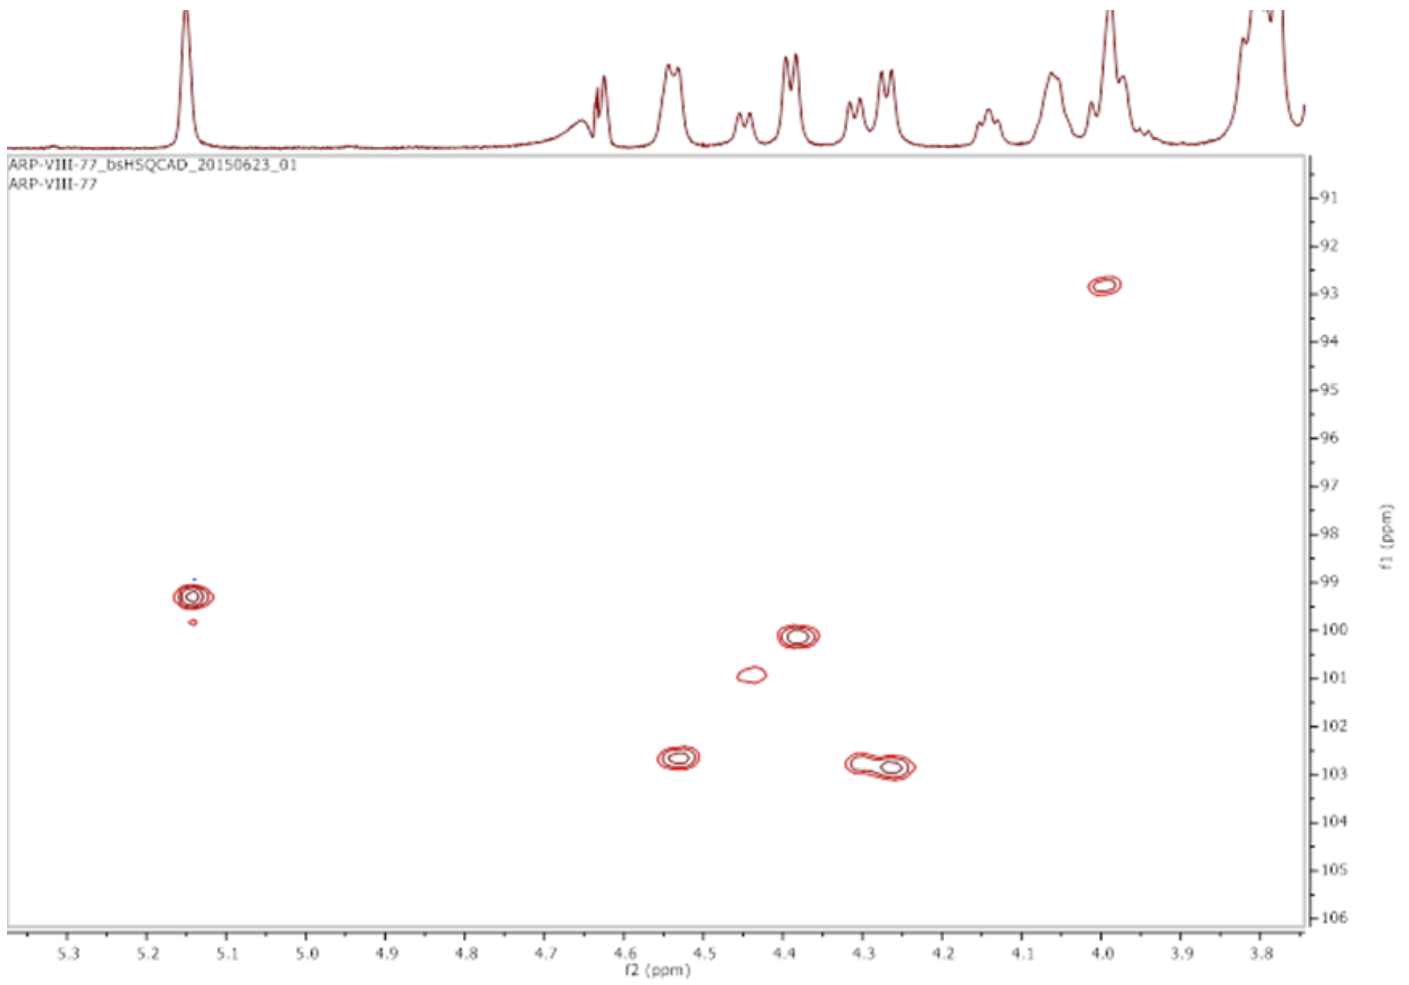



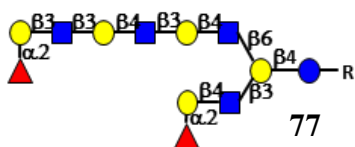

$^1\text{H}$  (600 MHz,  $\text{D}_2\text{O}$ ):  $\delta$  (ppm)

|                     | H1                            | H2   | H3   | H4   | H5                 | H6  | $\text{CH}_3$ | NHAc                    |
|---------------------|-------------------------------|------|------|------|--------------------|-----|---------------|-------------------------|
| Glc                 | 4.00                          | 3.35 | 3.41 | 3.49 | n/a <sup>[a]</sup> | n/a | -             | -                       |
| Gal                 | 4.28                          | 3.42 | 3.56 | 3.98 | n/a                | n/a | -             | -                       |
| GlcNAc              | 4.53<br>(d, $J = 9.0$ Hz, 1H) | 3.65 | 3.55 | 3.43 | n/a                | n/a | -             | 1.91 - 1.81<br>(m, 12H) |
| Gal(2)              | 4.39<br>(d, $J = 7.5$ Hz, 1H) | 3.52 | 3.64 | 3.73 | n/a                | n/a | -             | -                       |
| GlcNAc(2)           | 4.44                          | 3.57 | n/a  | 3.43 | n/a                | n/a | -             | 1.91 - 1.81<br>(m, 12H) |
| Gal(3)              | 4.28                          | 3.42 | 3.56 | 3.99 | n/a                | n/a | -             | -                       |
| GlcNAc(3)           | 4.53                          | 3.65 | 3.55 | 3.43 | n/a                | n/a | -             | 1.91-1.81<br>(m, 12H)   |
| Gal(4)              | 4.28                          | 3.43 | 3.58 | 3.99 | n/a                | n/a | -             | -                       |
| GlcNAc(4)           | 4.46                          | 3.65 | 3.55 | 3.35 | n/a                | n/a | -             | 1.91-1.81<br>(m, 12H)   |
| Gal(5)              | 4.49<br>(d, $J = 7.3$ Hz, 1H) | 3.43 | 3.68 | 3.72 | n/a                | n/a | -             | -                       |
| Fuc(1)( $\alpha$ 2) | 5.15                          | 3.65 | 3.50 | 3.66 | 4.14               | -   | 1.08          | -                       |
| Fuc(2)( $\alpha$ 2) | 5.04<br>(d, $J = 3.8$ Hz, 1H) | 3.61 | 3.51 | 3.57 | 4.07               | -   | 1.08          | -                       |

$^{13}\text{C}$  from BSHSQC (150 MHz,  $\text{D}_2\text{O}$ ):  $\delta$  (ppm)

|                     | C1     |
|---------------------|--------|
| Glc                 | 92.84  |
| Gal                 | 102.91 |
| GlcNAc              | 102.73 |
| Gal(2)              | 100.08 |
| GlcNAc(2)           | 100.89 |
| Gal(3)              | 102.91 |
| GlcNAc(3)           | 102.73 |
| Gal(4)              | 102.91 |
| GlcNAc(4)           | 103.12 |
| Gal(5)              | 100.17 |
| Fuc(1)( $\alpha$ 2) | 99.41  |
| Fuc(2)( $\alpha$ 2) | 99.37  |

<sup>[a]</sup> Not assigned

<sup>[b]</sup> Not applicable

MALDI TOF-MS  $m/z$  calcd  $\text{C}_{101}\text{H}_{162}\text{N}_8\text{O}_{64}\text{Na}^-$  ( $\text{M} + \text{Na}$ )<sup>+</sup> exact 2533.9566, found 2534.3401.

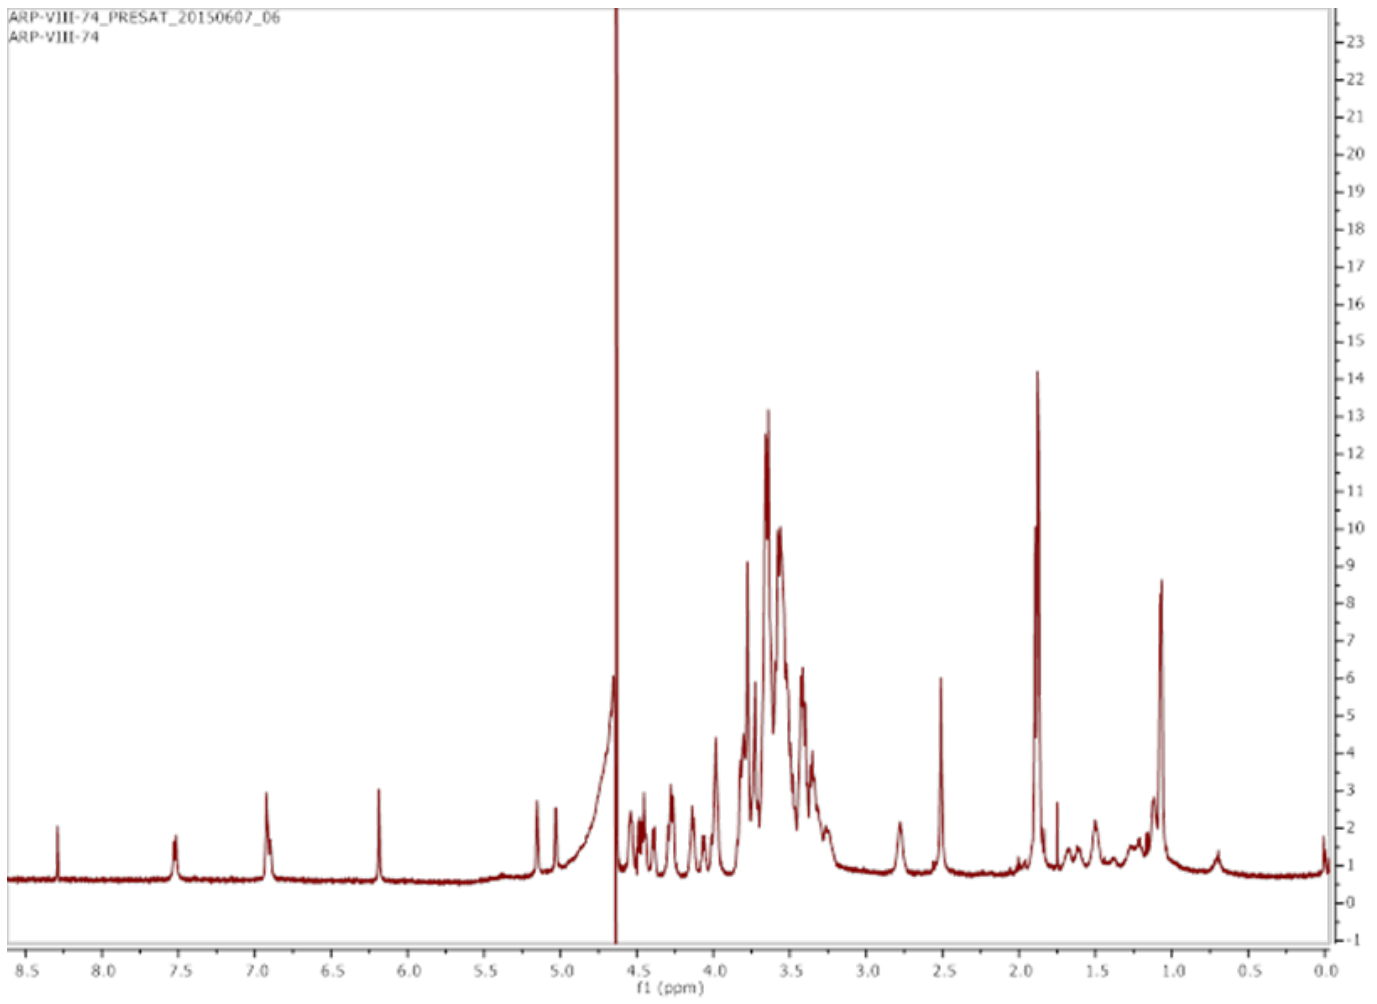

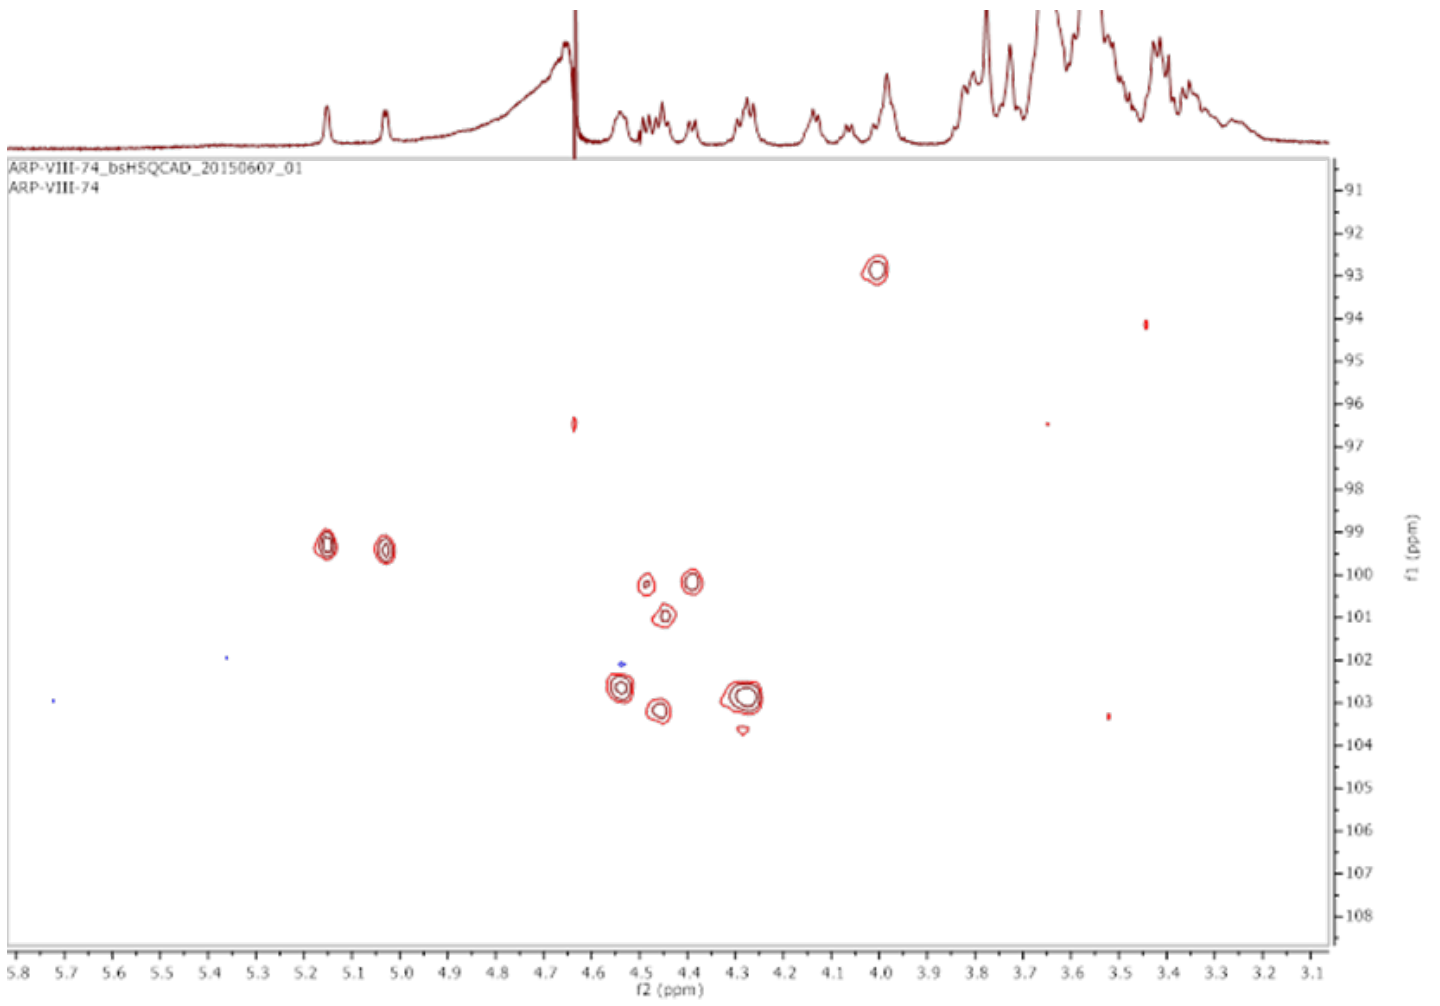

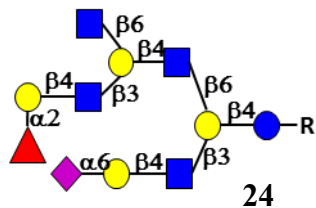

$^1\text{H}$  (800 MHz,  $\text{D}_2\text{O}$ ):  $\delta$  (ppm)

|           | H1                            | H2   | H3                         | H4   | H5                 | H6   | H7               | H8  | H9           | $\text{CH}_3$                 | NHAc                    |
|-----------|-------------------------------|------|----------------------------|------|--------------------|------|------------------|-----|--------------|-------------------------------|-------------------------|
| Glc       | 4.00<br>(d, $J = 9.1$ Hz, 1H) | 3.35 | 3.42                       | 3.53 | n/a <sup>[a]</sup> | n/a  | - <sup>[b]</sup> | -   | -            | -                             | -                       |
| Gal       | 4.27                          | 3.41 | 3.51                       | 3.97 | n/a                | n/a  | -                | -   | -            | -                             | -                       |
| GlcNAc    | 4.55<br>(d, $J = 7.4$ Hz, 1H) | 3.62 | n/a                        | 3.43 | n/a                | n/a  | -                | -   | -            | -                             | 1.91 - 1.81<br>(m, 15H) |
| Gal(2)    | 4.29                          | 3.38 | 3.49                       | 3.75 | n/a                | n/a  | -                | -   | -            | -                             | -                       |
| GlcNAc(2) | 4.44<br>(d, $J = 8.5$ Hz, 1H) | 3.58 | 3.53                       | 3.42 | n/a                | n/a  | -                | -   | -            | -                             | 1.91 - 1.81<br>(m, 15H) |
| Gal(3)    | 4.27                          | 3.43 | 3.51                       | 3.97 | n/a                | n/a  | -                | -   | -            | -                             | -                       |
| GlcNAc(3) | 4.52<br>(d, $J = 8.4$ Hz, 1H) | 3.64 | 3.53                       | 3.29 | n/a                | n/a  | -                | -   | -            | -                             | 1.91 - 1.81<br>(m, 15H) |
| Gal(4)    | 4.38<br>(d, $J = 7.7$ Hz, 1H) | 3.50 | 3.63                       | 3.70 | n/a                | n/a  | -                | -   | -            | -                             | -                       |
| GlcNAc(4) | 4.42<br>(d, $J = 8.2$ Hz, 1H) | 3.56 | 3.52                       | 3.39 | n/a                | n/a  | -                | -   | -            | -                             | 1.91 - 1.81<br>(m, 15H) |
| Gal(5)    | 4.28                          | 3.37 | 3.49                       | 3.75 | n/a                | n/a  | -                | -   | -            | -                             | -                       |
| Fuc       | 5.15<br>(d, $J = 3.2$ Hz, 1H) | 3.65 | n/a                        | n/a  | 4.07               | -    | -                | -   | -            | 1.07<br>(d, $J = 6.6$ Hz, 3H) | -                       |
| Neu5Ac(1) | -                             | -    | 2.52 - eq.<br>1.55 - axial | 3.49 | 3.62               | 3.51 | n/a              | n/a | 3.69<br>3.48 | -                             | 1.91 - 1.81<br>(m, 15H) |

$^{13}\text{C}$  from BSHSQC (200 MHz,  $\text{D}_2\text{O}$ ):  $\delta$  (ppm)

|           | C1     |
|-----------|--------|
| Glc       | 92.85  |
| Gal       | 102.88 |
| GlcNAc    | 102.47 |
| Gal(2)    | 103.45 |
| GlcNAc(2) | 100.90 |
| Gal(3)    | 102.88 |
| GlcNAc(3) | n/a    |
| Gal(4)    | 100.14 |
| GlcNAc(4) | 100.87 |
| Gal(5)    | 102.79 |
| Fuc       | 99.36  |

<sup>[a]</sup> Not assigned

<sup>[b]</sup> Not applicable

MALDI TOF-MS  $m/z$  calcd  $\text{C}_{106}\text{H}_{168}\text{N}_9\text{O}_{68}\text{Na}_2^-$  ( $M + 2\text{Na}$ )<sup>+</sup> exact 2700.9766, found 2700.4026.

ARP-VIII-39\_PRESAT\_20150425\_01  
ARP-VIII-39

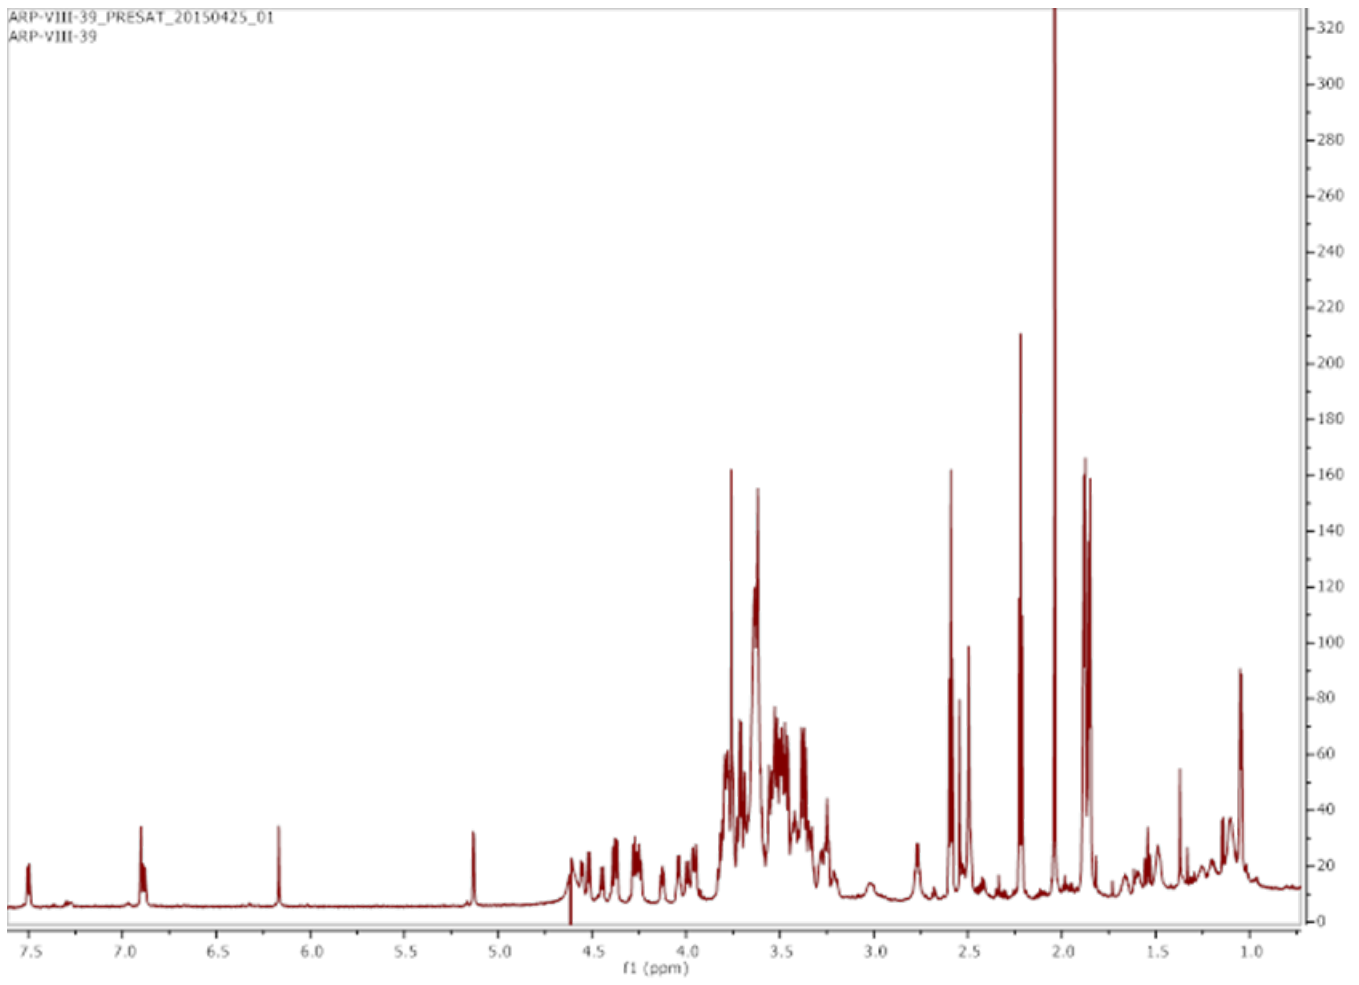

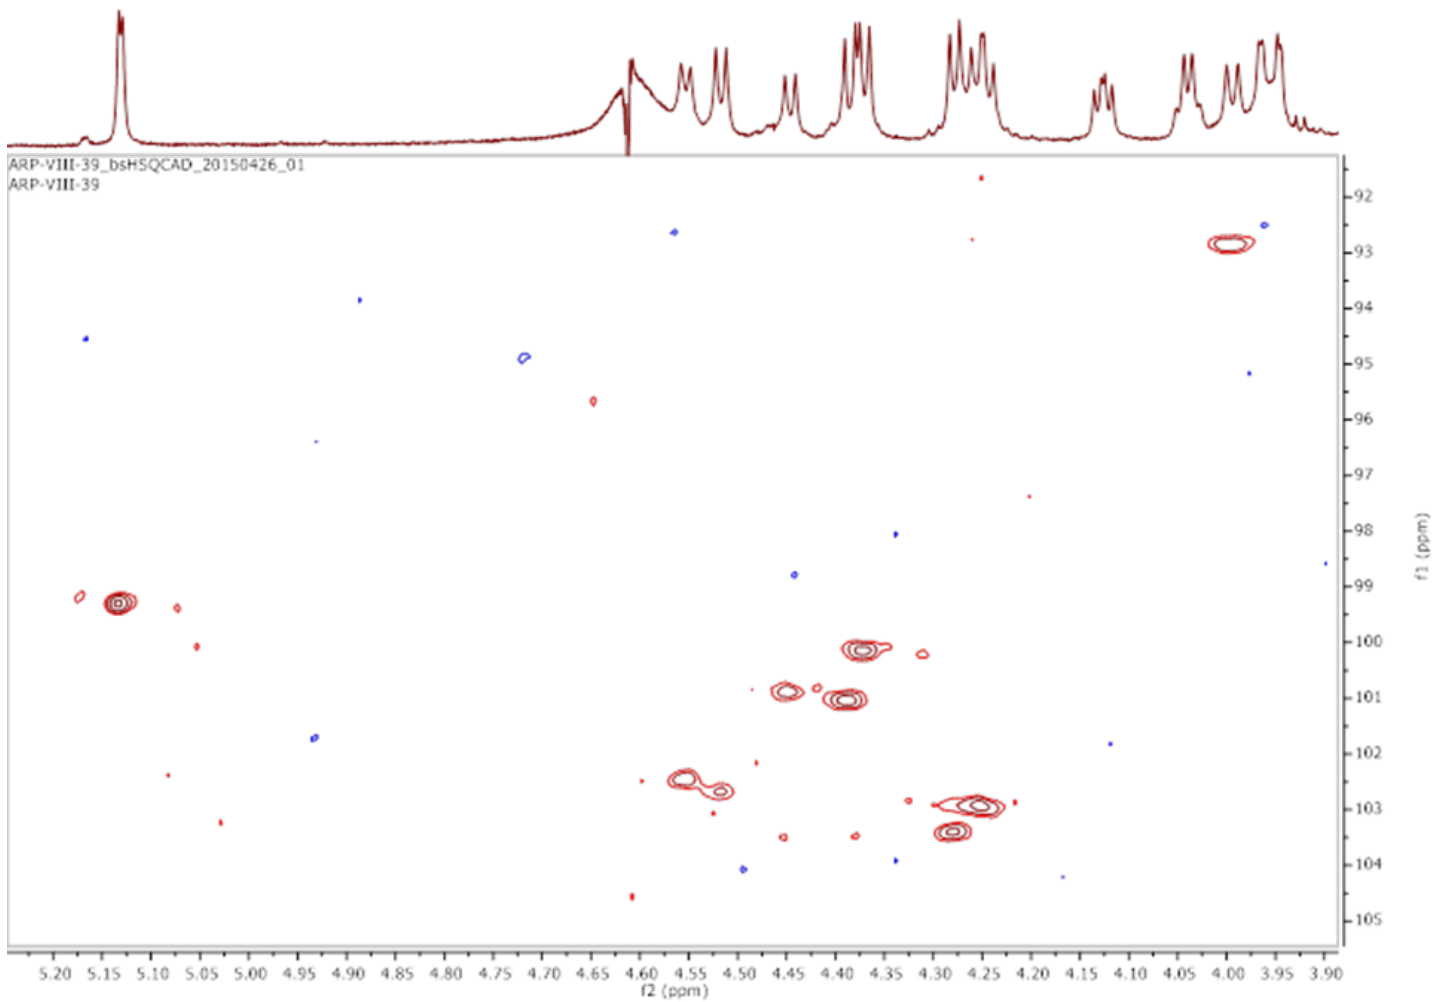

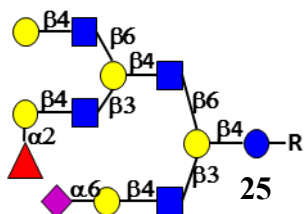

$^1\text{H}$  (600 MHz,  $\text{D}_2\text{O}$ ):  $\delta$  (ppm)

|           | H1                             | H2   | H3                         | H4   | H5                 | H6   | H7               | H8  | H9           | $\text{CH}_3$                 | NHAc                    |
|-----------|--------------------------------|------|----------------------------|------|--------------------|------|------------------|-----|--------------|-------------------------------|-------------------------|
| Glc       | 4.00<br>(d, $J = 9.2$ Hz, 1H)  | 3.35 | 3.42                       | 3.48 | n/a <sup>[a]</sup> | n/a  | - <sup>[b]</sup> | -   | -            | -                             | -                       |
| Gal       | 4.27                           | 3.41 | 3.55                       | 3.97 | n/a                | n/a  | -                | -   | -            | -                             | -                       |
| GlcNAc    | 4.57<br>(d, $J = 8.1$ Hz, 1H)  | 3.64 | 3.50                       | 3.45 | n/a                | n/a  | -                | -   | -            | -                             | 1.91 - 1.81<br>(m, 18H) |
| Gal(2)    | 4.29                           | 3.42 | 3.55                       | 3.98 | n/a                | n/a  | -                | -   | -            | -                             | -                       |
| GlcNAc(2) | 4.46<br>(d, $J = 8.2$ Hz, 1H)  | 3.58 | 3.53                       | 3.44 | n/a                | n/a  | -                | -   | -            | -                             | 1.91 - 1.81<br>(m, 18H) |
| Gal(3)    | 4.27                           | 3.43 | 3.55                       | 3.98 | n/a                | n/a  | -                | -   | -            | -                             | -                       |
| GlcNAc(3) | 4.54<br>(d, $J = 8.45$ Hz, 2H) | 3.64 | 3.53                       | 3.31 | n/a                | n/a  | -                | -   | -            | -                             | 1.91 - 1.81<br>(m, 18H) |
| Gal(4)    | 4.38<br>(d, $J = 7.6$ Hz, 1H)  | 3.52 | n/a                        | 3.72 | n/a                | n/a  | -                | -   | -            | -                             | -                       |
| GlcNAc(4) | 4.42                           | 3.58 | n/a                        | n/a  | n/a                | n/a  | -                | -   | -            | -                             | 1.91 - 1.81<br>(m, 18H) |
| Gal(5)    | 4.28                           | 3.42 | 3.55                       | 3.98 | n/a                | n/a  | -                | -   | -            | -                             | -                       |
| GlcNAc(5) | 4.54<br>(d, $J = 8.45$ Hz, 2H) | 3.64 | n/a                        | n/a  | n/a                | n/a  | -                | -   | -            | -                             | 1.91 - 1.81<br>(m, 18H) |
| Gal(6)    | 4.31                           | 3.38 | 3.51                       | 3.76 | n/a                | n/a  | -                | -   | -            | -                             | -                       |
| Fuc       | 5.15                           | 3.65 | n/a                        | n/a  | 4.07               | -    | -                | -   | -            | 1.07<br>(d, $J = 6.4$ Hz, 3H) | -                       |
| Neu5Ac(1) | -                              | -    | 2.52 - eq.<br>1.55 - axial | 3.49 | 3.62               | 3.51 | n/a              | n/a | 3.69<br>3.48 | -                             | 1.91 - 1.81<br>(m, 18H) |

$^{13}\text{C}$  from BSHSQC (150 MHz,  $\text{D}_2\text{O}$ ):  $\delta$  (ppm)

|           | C1     |
|-----------|--------|
| Glc       | 92.85  |
| Gal       | 102.88 |
| GlcNAc    | 102.36 |
| Gal(2)    | 103.45 |
| GlcNAc(2) | 100.90 |
| Gal(3)    | 102.88 |
| GlcNAc(3) | 102.61 |
| Gal(4)    | 100.12 |
| GlcNAc(4) | 100.94 |
| Gal(5)    | 102.86 |
| GlcNAc(5) | 102.61 |
| Gal(6)    | 102.65 |
| Fuc       | 99.37  |

<sup>[a]</sup> Not assigned

<sup>[b]</sup> Not applicable

MALDI TOF-MS  $m/z$  calcd  $\text{C}_{120}\text{H}_{191}\text{N}_{10}\text{O}_{78}\text{Na}_2^-$  ( $M + 2\text{Na}$ )<sup>+</sup> exact 3066.1087, found 3067.1699.

ARP-VIII-63\_PRESAT\_20150507\_01  
ARP-VIII-63

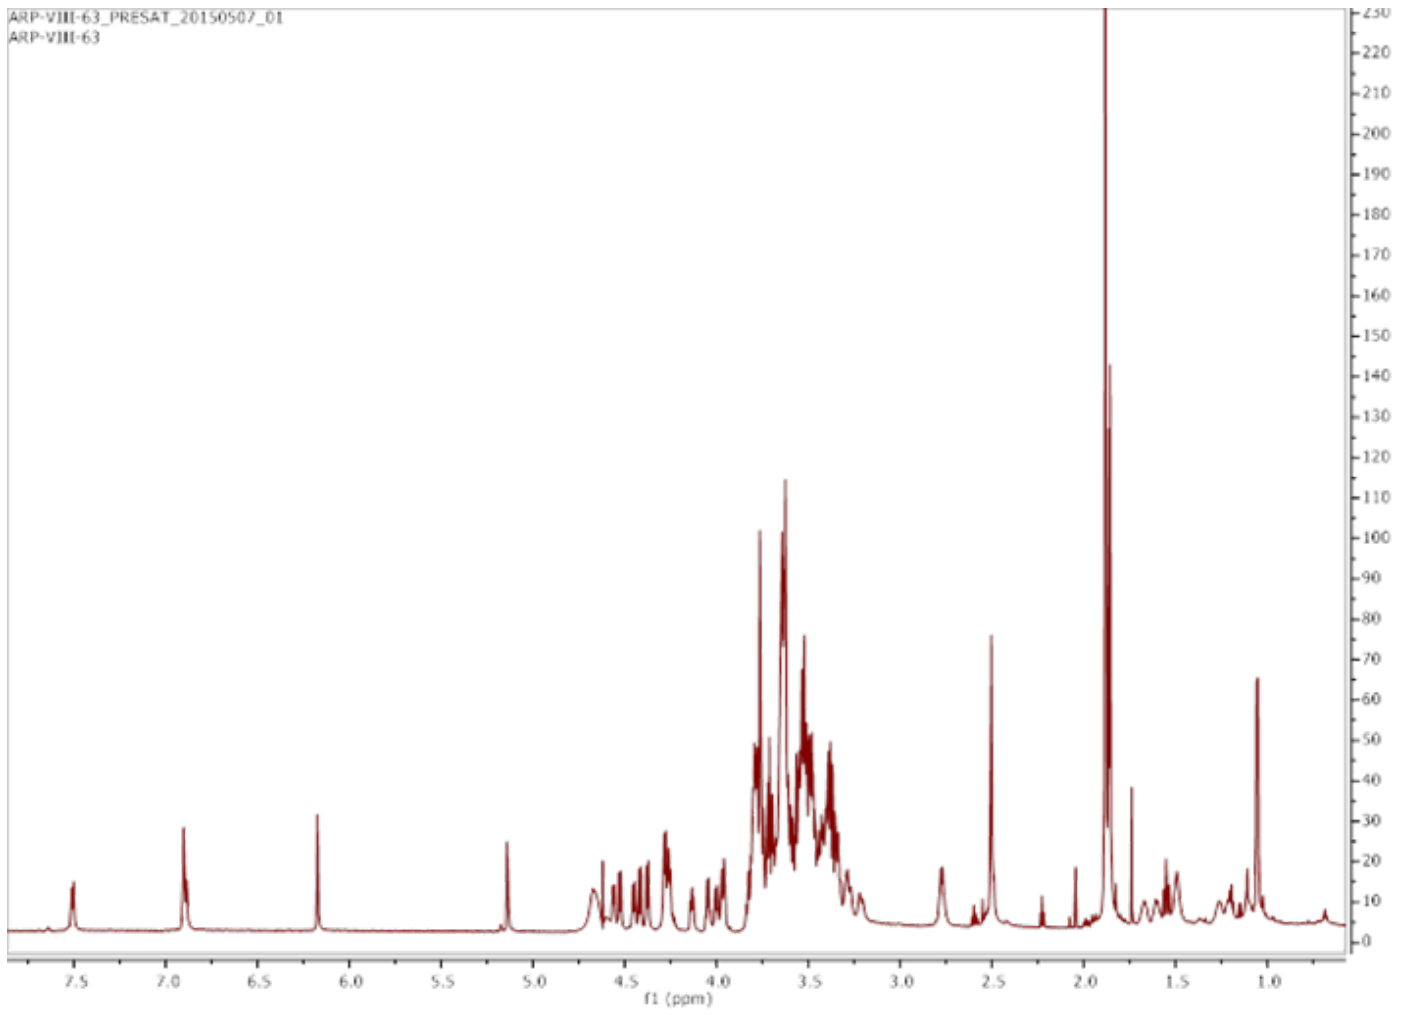



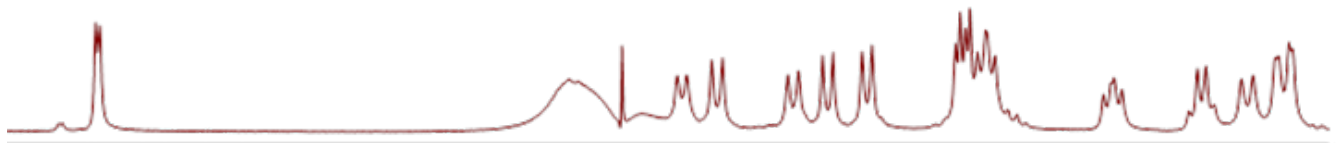

ARP-VIII-63\_bsHSQCAD\_20150507\_01  
ARP-VIII-63

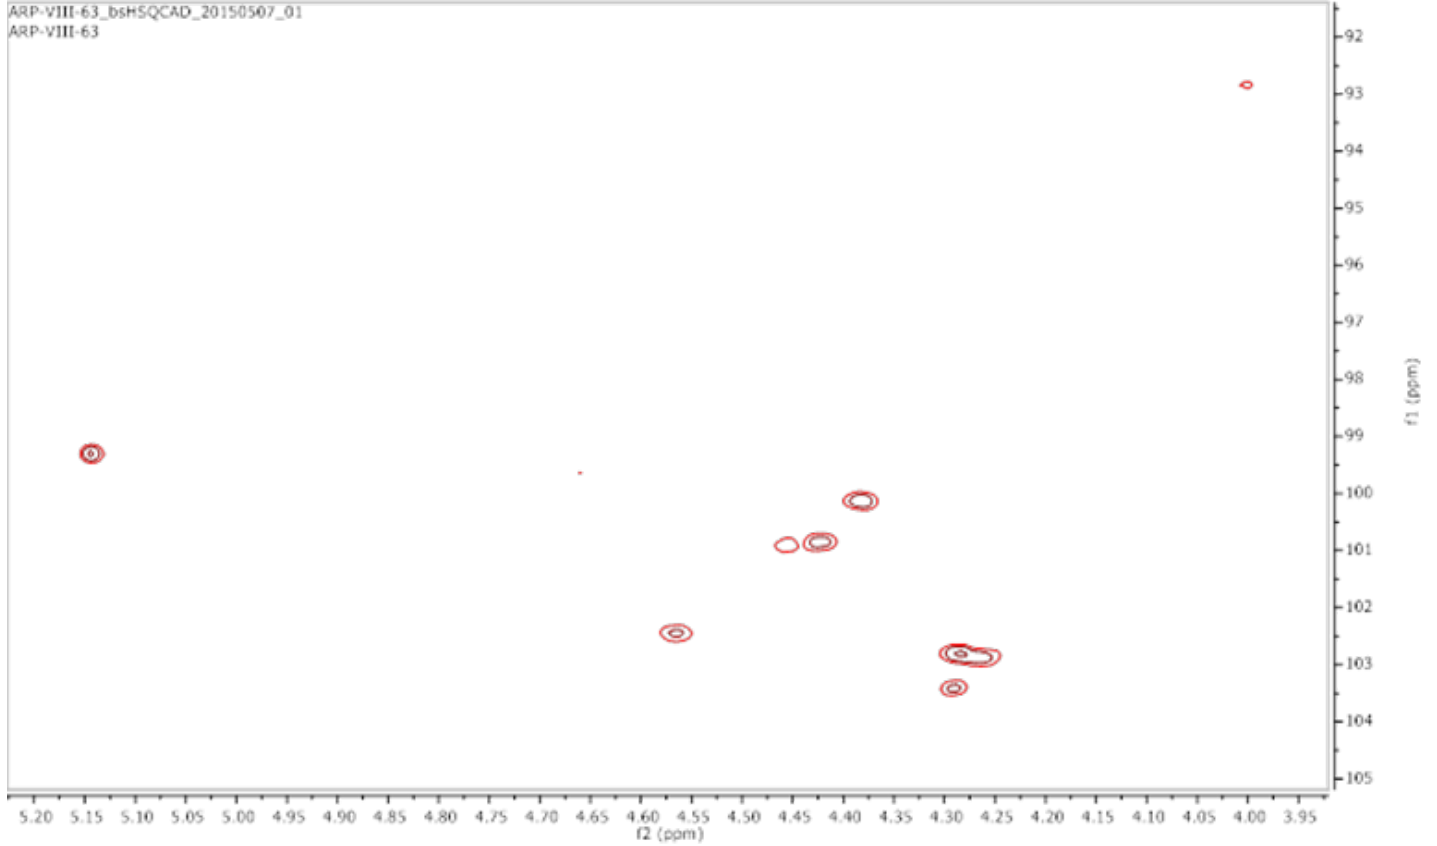

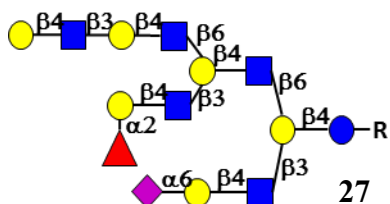

$^1\text{H}$  (800 MHz,  $\text{D}_2\text{O}$ ):  $\delta$  (ppm)

|           | H1   | H2   | H3                         | H4   | H5                 | H6   | H7               | H8  | H9           | $\text{CH}_3$ | NHAc                    |
|-----------|------|------|----------------------------|------|--------------------|------|------------------|-----|--------------|---------------|-------------------------|
| Glc       | 4.00 | 3.34 | 3.41                       | 3.48 | n/a <sup>[a]</sup> | n/a  | - <sup>[b]</sup> | -   | -            | -             | -                       |
| Gal       | 4.28 | 3.43 | 3.54                       | 3.98 | n/a                | n/a  | -                | -   | -            | -             | -                       |
| GlcNAc    | 4.55 | 3.65 | n/a                        | n/a  | n/a                | n/a  | -                | -   | -            | -             | 1.91 - 1.81<br>(m, 18H) |
| Gal(2)    | 4.39 | 3.52 | 3.65                       | 3.72 | n/a                | n/a  | -                | -   | -            | -             | -                       |
| GlcNAc(2) | 4.46 | 3.60 | 3.54                       | 3.44 | n/a                | n/a  | -                | -   | -            | -             | 1.91 - 1.81<br>(m, 18H) |
| Gal(3)    | 4.28 | 3.41 | 3.54                       | 3.98 | n/a                | n/a  | -                | -   | -            | -             | -                       |
| GlcNAc(3) | 4.55 | 3.65 | 3.54                       | 3.31 | n/a                | n/a  | -                | -   | -            | -             | 1.91 - 1.81<br>(m, 18H) |
| Gal(4)    | 4.39 | 3.52 | 3.65                       | 3.72 | n/a                | n/a  | -                | -   | -            | -             | -                       |
| GlcNAc(4) | 4.41 | 3.52 | n/a                        | 3.41 | n/a                | n/a  | -                | -   | -            | -             | 1.91 - 1.81<br>(m, 18H) |
| Gal(5)    | 4.28 | 3.43 | 3.55                       | 3.98 | n/a                | n/a  | -                | -   | -            | -             | -                       |
| GlcNAc(5) | 4.55 | 3.65 | n/a                        | n/a  | n/a                | n/a  | -                | -   | -            | -             | 1.91 - 1.81<br>(m, 18H) |
| Gal(6)    | 4.33 | 3.39 | 3.52                       | 3.78 | n/a                | n/a  | -                | -   | -            | -             | -                       |
| Fuc(1)    | 5.15 | 3.65 | n/a                        | n/a  | 4.09               | -    | -                | -   | -            | 1.07          | -                       |
| Fuc(2)    | 5.15 | 3.65 | n/a                        | n/a  | 4.09               | -    | -                | -   | -            | 1.07          | -                       |
| Neu5Ac(1) | -    | -    | 2.52 – eq.<br>1.55 - axial | 3.49 | 3.62               | 3.51 | n/a              | n/a | 3.69<br>3.48 | -             | 1.91 - 1.81<br>(m, 18H) |

$^{13}\text{C}$  from BSHSQC (200 MHz,  $\text{D}_2\text{O}$ ):  $\delta$  (ppm)

|           | C1     |
|-----------|--------|
| Glc       | 92.77  |
| Gal       | 102.89 |
| GlcNAc    | 102.69 |
| Gal(2)    | 100.18 |
| GlcNAc(2) | 101.97 |
| Gal(3)    | 102.89 |
| GlcNAc(3) | 102.69 |
| Gal(4)    | 100.18 |
| GlcNAc(4) | 100.97 |
| Gal(5)    | 102.89 |
| GlcNAc(5) | 102.69 |
| Gal(6)    | 102.82 |
| Fuc(1)    | 99.37  |
| Fuc(2)    | 99.37  |

<sup>[a]</sup> Not assigned

<sup>[b]</sup> Not applicable

MALDI TOF-MS  $m/z$  calcd  $\text{C}_{115}\text{H}_{185}\text{N}_9\text{O}_{74}\text{Na}^-$  ( $\text{M} + \text{Na}$ )<sup>+</sup> exact 2899.0887, found 2900.7866.

ARP-VIII-73\_PRESAT\_20150530\_05  
ARP-VIII-73

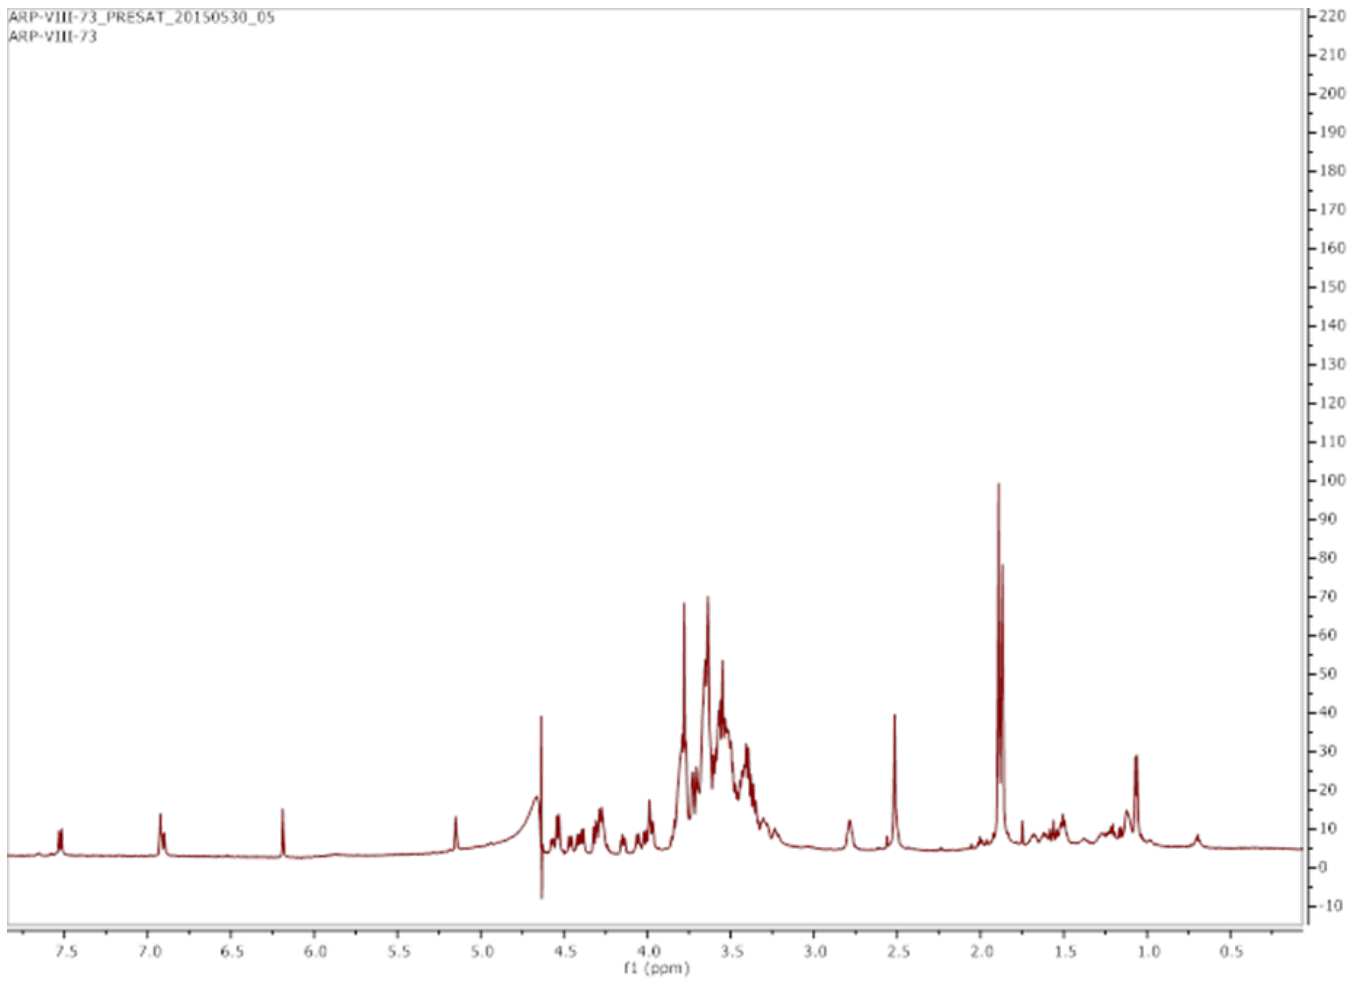

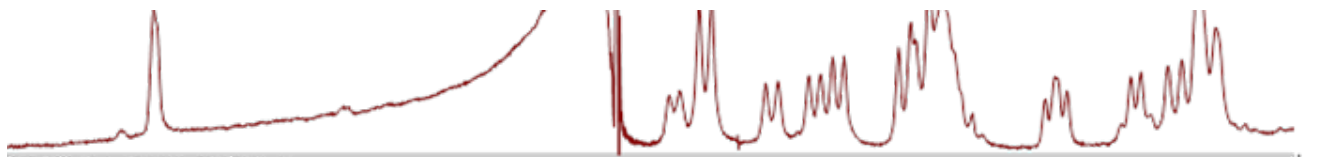

ARP-VIII-73\_bsHSQCAD\_20150531\_01  
ARP-VIII-73

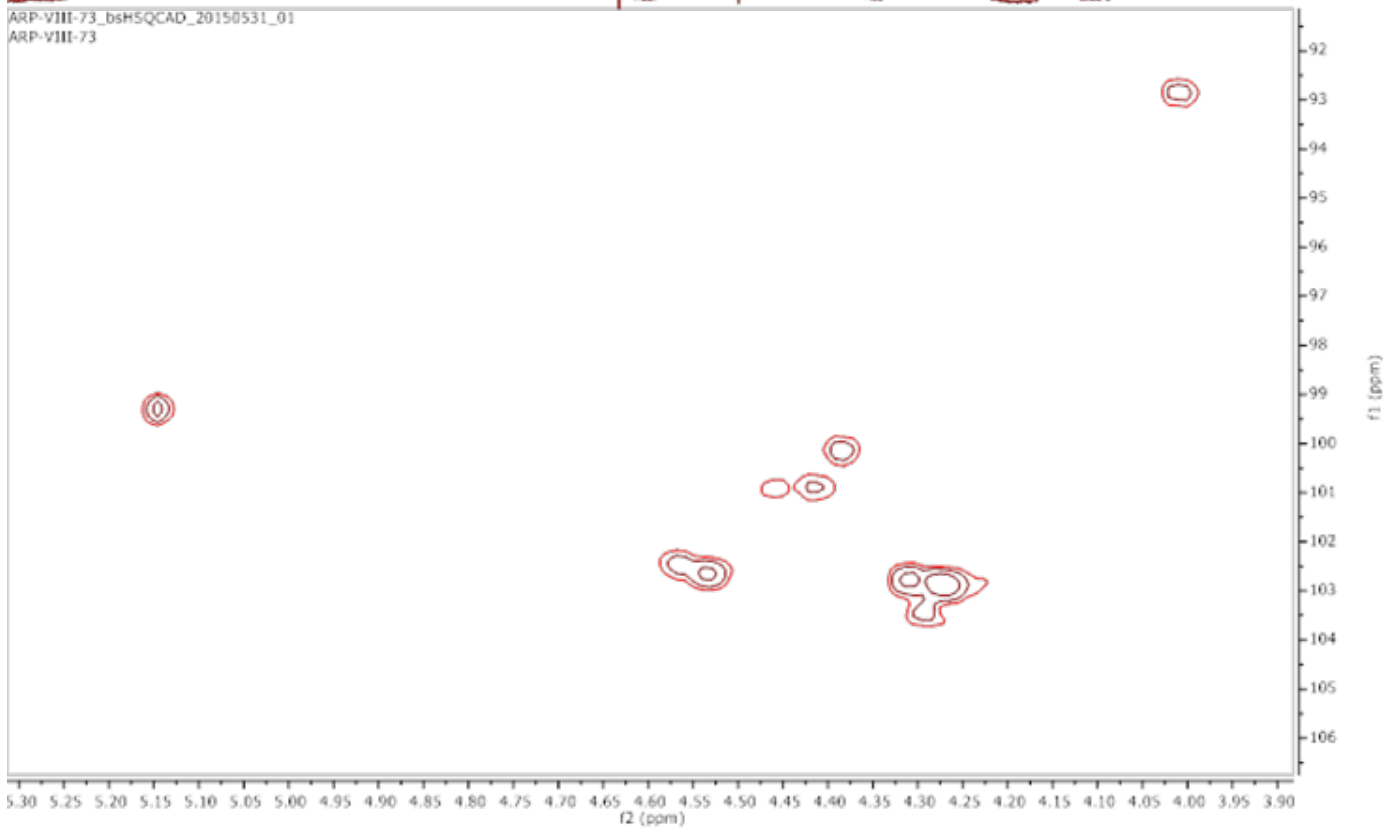

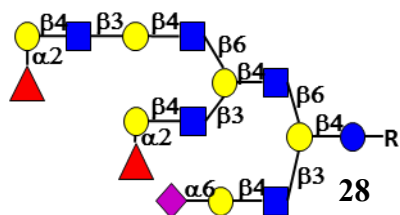

$^1\text{H}$  (900 MHz,  $\text{D}_2\text{O}$ ):  $\delta$  (ppm)

|           | H1                            | H2   | H3                         | H4   | H5                 | H6   | H7               | H8  | H9           | $\text{CH}_3$                 | NHAc                    |
|-----------|-------------------------------|------|----------------------------|------|--------------------|------|------------------|-----|--------------|-------------------------------|-------------------------|
| Glc       | 4.00<br>(d, $J = 9.2$ Hz, 1H) | 3.35 | 3.41                       | 3.48 | n/a <sup>[a]</sup> | n/a  | - <sup>[b]</sup> | -   | -            | -                             | -                       |
| Gal       | 4.27                          | 3.41 | 3.55                       | 3.97 | n/a                | n/a  | -                | -   | -            | -                             | -                       |
| GlcNAc    | 4.56<br>(d, $J = 6.2$ Hz, 1H) | 3.64 | 3.50                       | 3.45 | n/a                | n/a  | -                | -   | -            | -                             | 1.91 - 1.81<br>(m, 18H) |
| Gal(2)    | 4.29                          | 3.37 | 3.51                       | 3.76 | n/a                | n/a  | -                | -   | -            | -                             | -                       |
| GlcNAc(2) | 4.46<br>(d, $J = 8.2$ Hz, 1H) | 3.58 | 3.53                       | 3.44 | n/a                | n/a  | -                | -   | -            | -                             | 1.91 - 1.81<br>(m, 18H) |
| Gal(3)    | 4.27                          | 3.41 | 3.55                       | 3.97 | n/a                | n/a  | -                | -   | -            | -                             | -                       |
| GlcNAc(3) | 4.54<br>(d, $J = 8.5$ Hz, 2H) | 3.64 | n/a                        | n/a  | n/a                | n/a  | -                | -   | -            | -                             | 1.91 - 1.81<br>(m, 18H) |
| Gal(4)    | 4.38                          | 3.52 | n/a                        | 3.72 | n/a                | n/a  | -                | -   | -            | -                             | -                       |
| GlcNAc(4) | 4.42<br>(d, $J = 7.8$ Hz, 1H) | 3.55 | n/a                        | 3.39 | n/a                | n/a  | -                | -   | -            | -                             | 1.91 - 1.81<br>(m, 18H) |
| Gal(5)    | 4.26                          | 3.41 | 3.55                       | 3.97 | n/a                | n/a  | -                | -   | -            | -                             | -                       |
| GlcNAc(5) | 4.54<br>(d, $J = 8.5$ Hz, 2H) | 3.64 | n/a                        | n/a  | n/a                | n/a  | -                | -   | -            | -                             | 1.91 - 1.81<br>(m, 18H) |
| Gal(6)    | 4.31                          | 3.50 | n/a                        | 3.71 | n/a                | n/a  | -                | -   | -            | -                             | -                       |
| Fuc(1)    | 5.14                          | 3.61 | n/a                        | n/a  | 4.05               | -    | -                | -   | -            | 1.04<br>(d, $J = 6.4$ Hz, 6H) | -                       |
| Fuc(2)    | 5.14                          | 3.61 | n/a                        | n/a  | 4.05               | -    | -                | -   | -            | 1.04<br>(d, $J = 6.4$ Hz, 6H) | -                       |
| Neu5Ac(1) | -                             | -    | 2.52 - eq.<br>1.55 - axial | 3.49 | 3.62               | 3.51 | n/a              | n/a | 3.69<br>3.48 | -                             | 1.91 - 1.81<br>(m, 18H) |

$^{13}\text{C}$  from BSHSQC (225 MHz,  $\text{D}_2\text{O}$ ):  $\delta$  (ppm)

|           | C1     |
|-----------|--------|
| Glc       | n/a    |
| Gal       | 105.75 |
| GlcNAc    | n/a    |
| Gal(2)    | n/a    |
| GlcNAc(2) | n/a    |
| Gal(3)    | 105.75 |
| GlcNAc(3) | n/a    |
| Gal(4)    | 102.69 |
| GlcNAc(4) | n/a    |
| Gal(5)    | 105.75 |
| GlcNAc(5) | n/a    |
| Gal(6)    | 102.69 |
| Fuc(1)    | 101.79 |
| Fuc(2)    | 101.79 |

<sup>[a]</sup> Not assigned

<sup>[b]</sup> Not applicable

ESI-MS  $m/z$  calcd C126H199N10 O82Na<sup>-</sup> (M - 2H)<sup>-</sup> 2 exact 1582.5897, found 1582.5869.

APrudden\_VIII-78\_presat\_20150702  
APrudden VIII-78  
900MHz

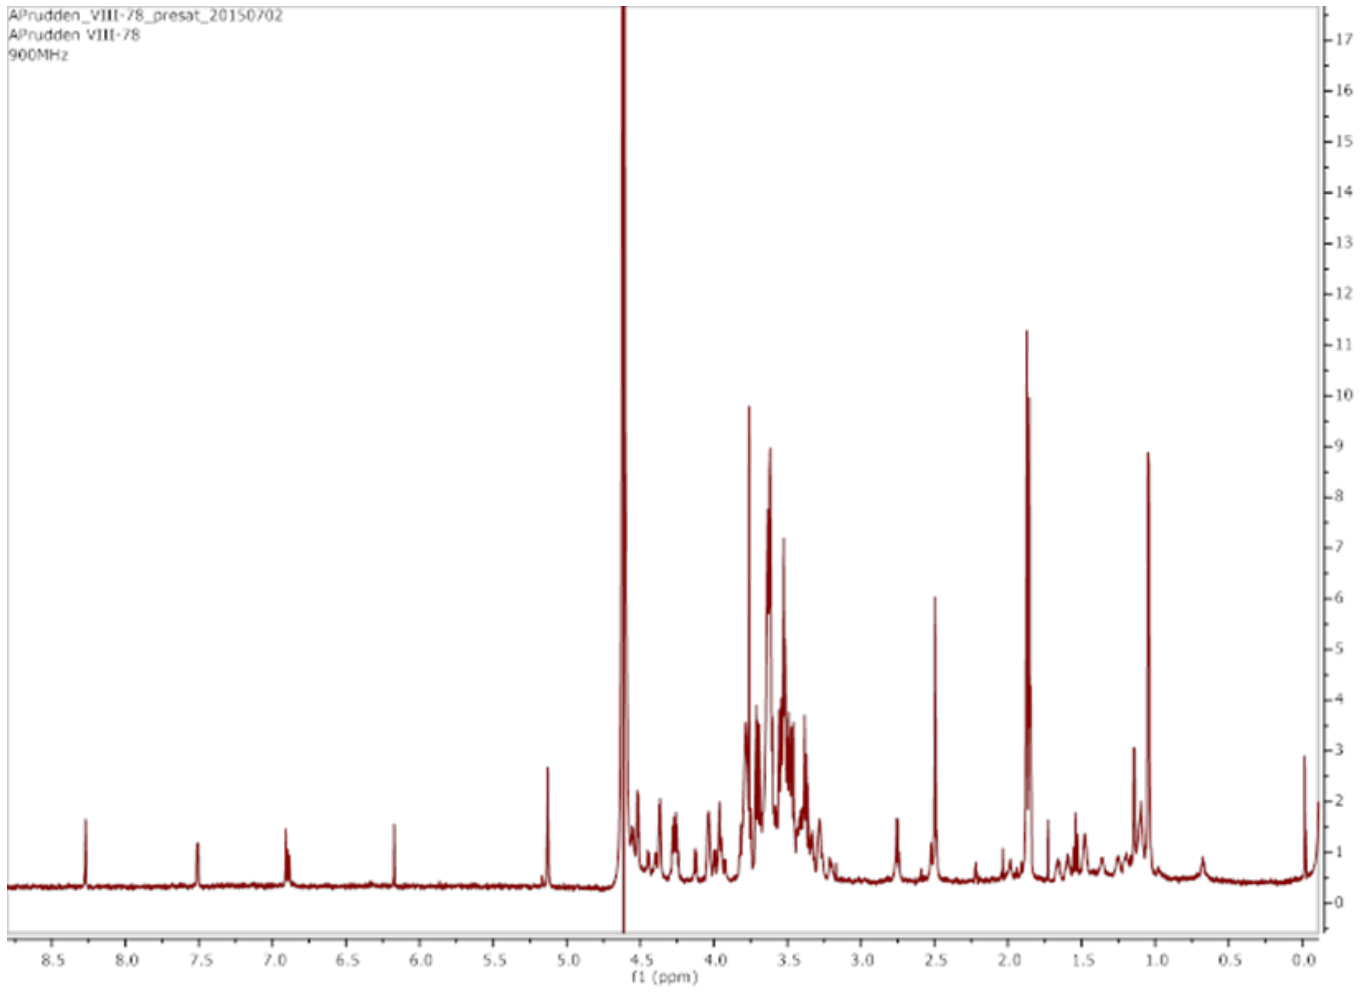

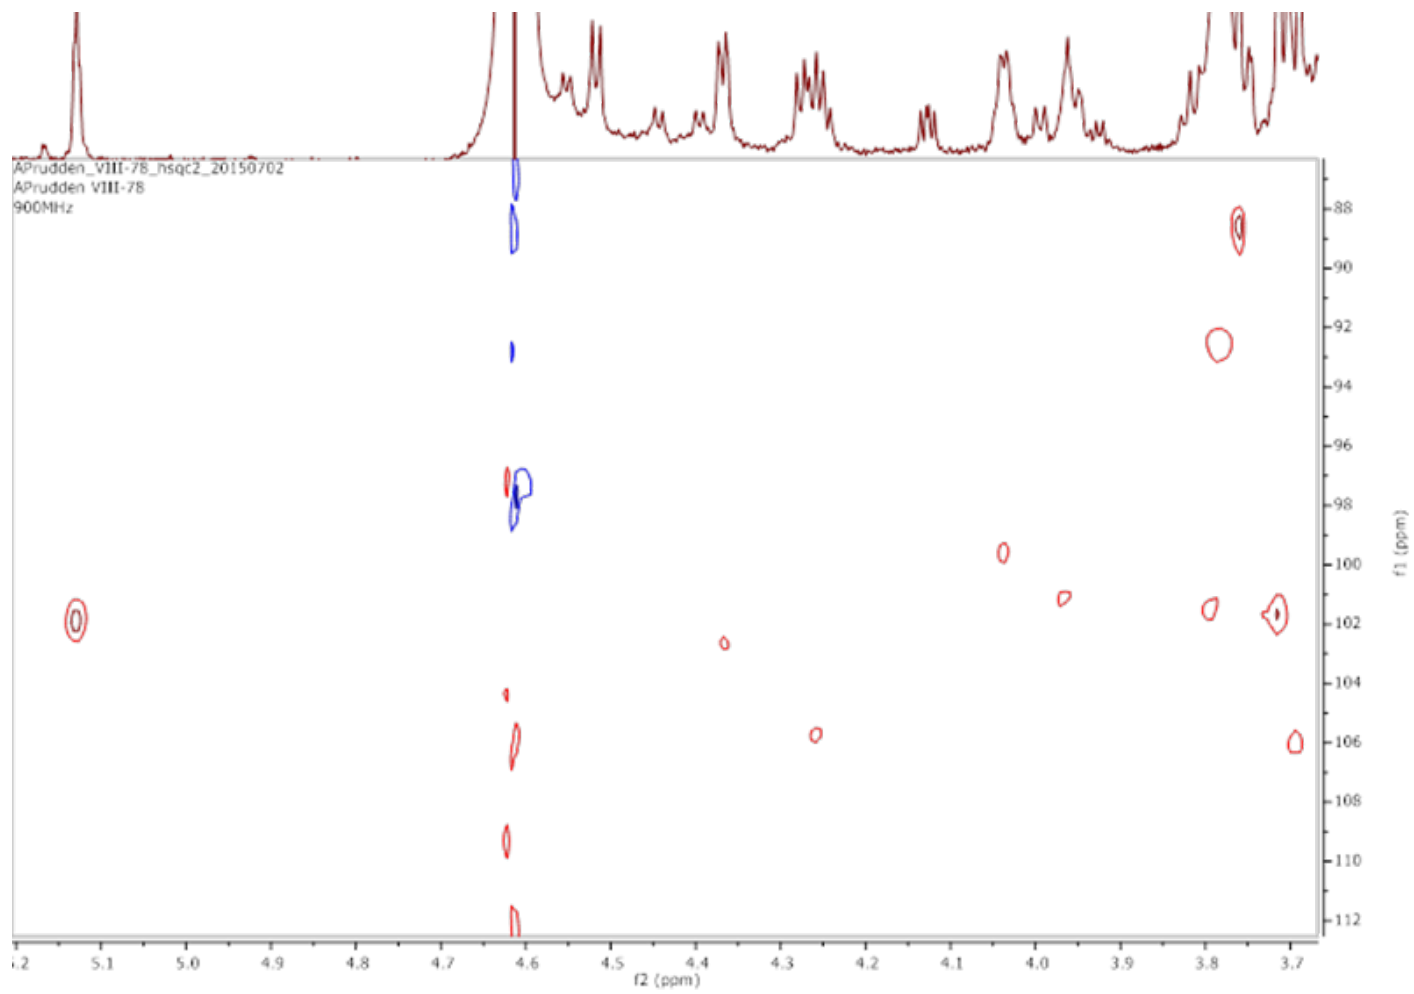

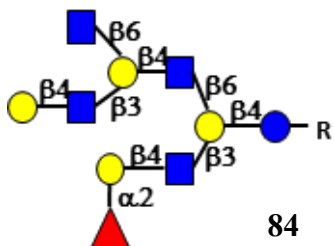

84

$^1\text{H}$  (600 MHz,  $\text{D}_2\text{O}$ ):  $\delta$  (ppm)

|           | H1                            | H2   | H3   | H4   | H5                 | H6  | H7               | H8 | H9 | $\text{CH}_3$                 | NHAc                    |
|-----------|-------------------------------|------|------|------|--------------------|-----|------------------|----|----|-------------------------------|-------------------------|
| Glc       | 4.00<br>(d, $J = 9.2$ Hz, 1H) | 3.37 | 3.42 | 3.48 | n/a <sup>[a]</sup> | n/a | - <sup>[b]</sup> | -  | -  | -                             | -                       |
| Gal       | 4.27                          | 3.43 | 3.55 | 3.99 | n/a                | n/a | -                | -  | -  | -                             | -                       |
| GlcNAc    | 4.55                          | 3.66 | 3.58 | 3.43 | n/a                | n/a | -                | -  | -  | -                             | 1.91 - 1.81<br>(m, 12H) |
| Gal(2)    | 4.39                          | 3.54 | n/a  | 3.74 | n/a                | n/a | -                | -  | -  | -                             | -                       |
| GlcNAc(2) | 4.46<br>(d, $J = 8.4$ Hz, 1H) | 3.63 | 3.56 | 3.45 | n/a                | n/a | -                | -  | -  | -                             | 1.91 - 1.81<br>(m, 12H) |
| Gal(3)    | 4.27                          | 3.43 | 3.55 | 3.98 | n/a                | n/a | -                | -  | -  | -                             | -                       |
| GlcNAc(3) | 4.54                          | 3.66 | 3.59 | 3.32 | n/a                | n/a | -                | -  | -  | -                             | 1.91 - 1.81<br>(m, 12H) |
| Gal(4)    | 4.32<br>(d, $J = 7.7$ Hz, 1H) | 3.40 | 3.53 | 3.78 | n/a                | n/a | -                | -  | -  | -                             | -                       |
| GlcNAc(4) | 4.42                          | 3.53 | 3.39 | 3.28 | n/a                | n/a | -                | -  | -  | -                             | 1.91 - 1.81<br>(m, 12H) |
| Fuc       | 5.15                          | 3.65 | n/a  | n/a  | 4.09               | -   | -                | -  | -  | 1.07<br>(d, $J = 6.4$ Hz, 3H) | -                       |

$^{13}\text{C}$  from BSHSQC (150 MHz,  $\text{D}_2\text{O}$ ):  $\delta$  (ppm)

|           | C1     |
|-----------|--------|
| Glc       | 92.89  |
| Gal       | 102.93 |
| GlcNAc    | 102.66 |
| Gal(2)    | 100.13 |
| GlcNAc(2) | 101.03 |
| Gal(3)    | 102.93 |
| GlcNAc(3) | 102.66 |
| Gal(4)    | 102.84 |
| GlcNAc(4) | 101.03 |
| Fuc       | 99.34  |

<sup>[a]</sup> Not assigned

<sup>[b]</sup> Not applicable

MALDI TOF-MS  $m/z$  calcd  $\text{C}_{89}\text{H}_{142}\text{N}_8\text{O}_{55}\text{Na}^-$  ( $\text{M} + \text{Na}$ )<sup>+</sup> exact 2225.8458, found 2225.1235.



ARP-VIII-82\_PRESAT\_20150626\_01  
ARP-VIII-82

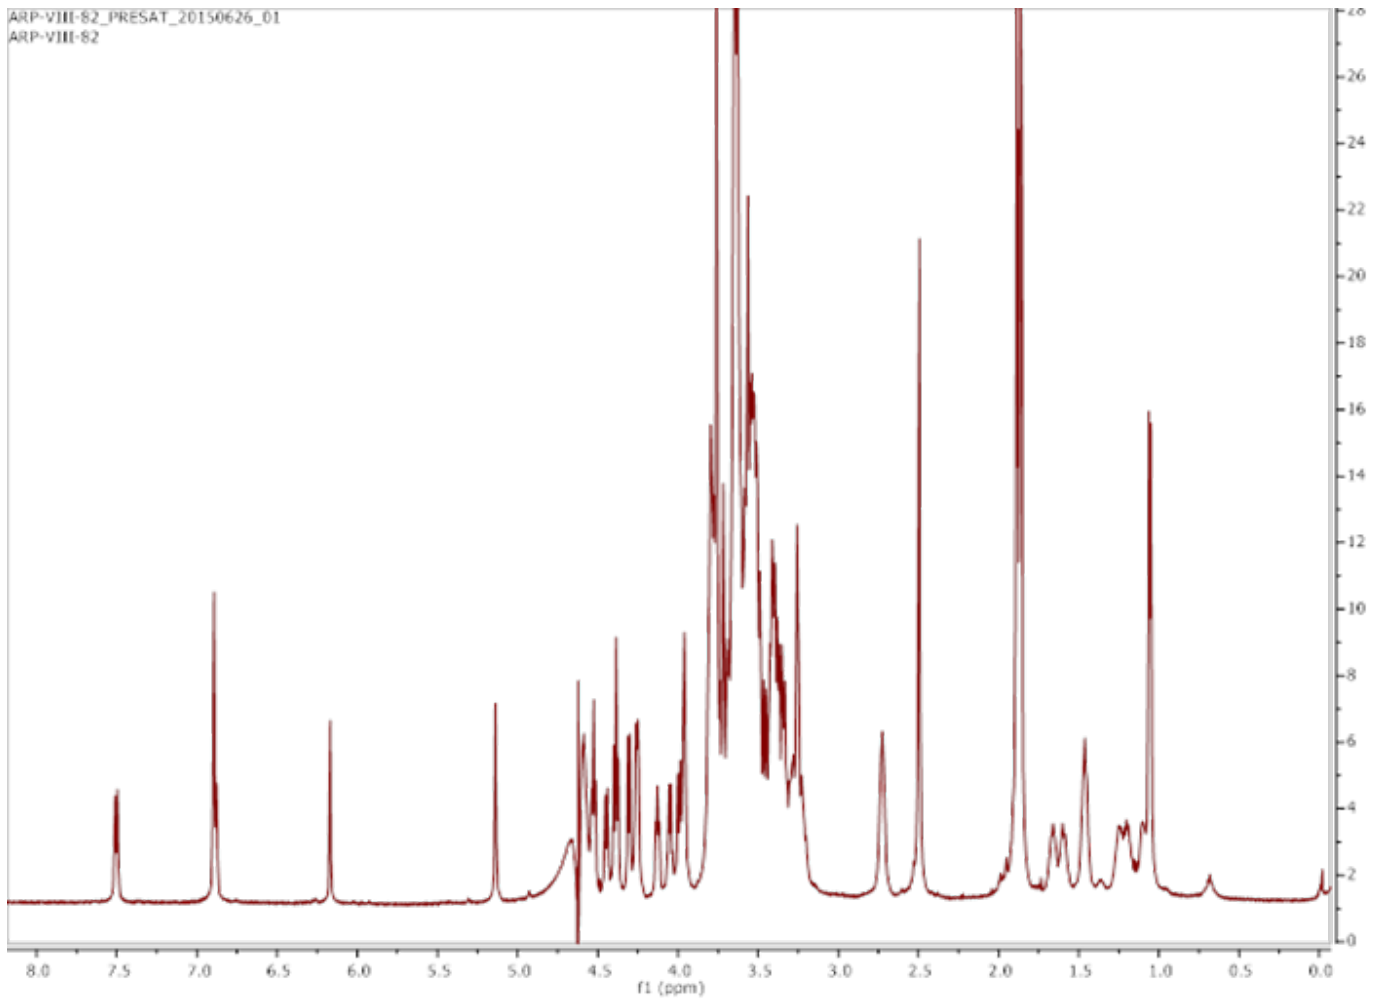

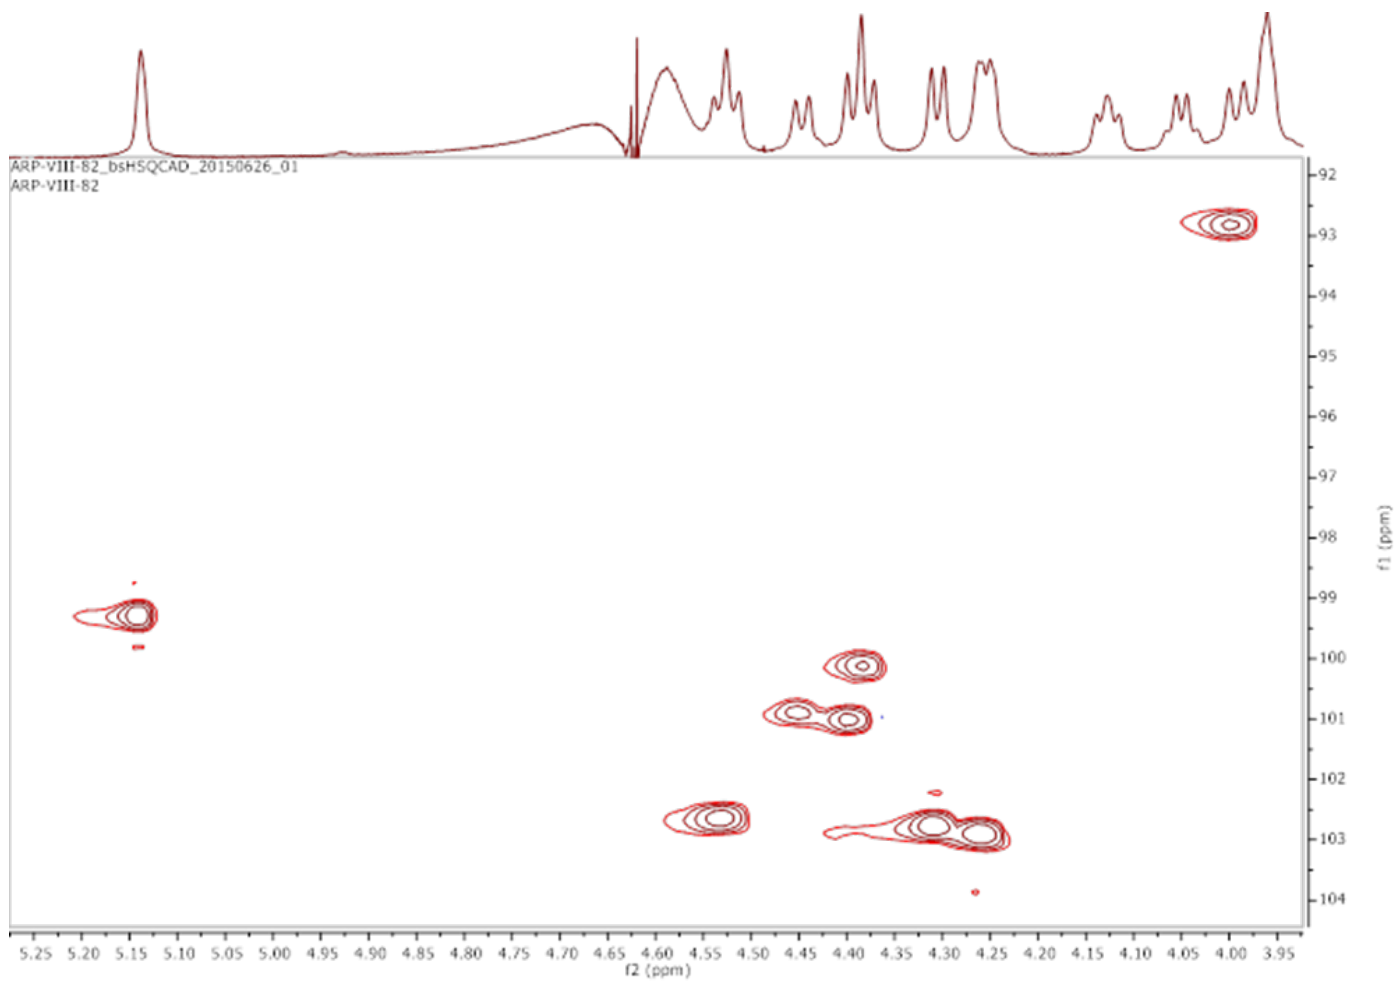

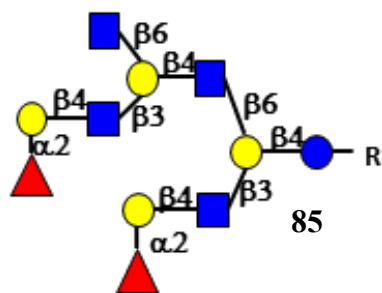

$^1\text{H}$  (600 MHz,  $\text{D}_2\text{O}$ ):  $\delta$  (ppm)

|           | H1                            | H2   | H3   | H4                            | H5                 | H6  | H7               | H8 | H9 | $\text{CH}_3$                 | NHAc                    |
|-----------|-------------------------------|------|------|-------------------------------|--------------------|-----|------------------|----|----|-------------------------------|-------------------------|
| Glc       | 4.00<br>(d, $J = 9.2$ Hz, 1H) | 3.34 | 3.41 | 3.48                          | n/a <sup>[a]</sup> | n/a | - <sup>[b]</sup> | -  | -  | -                             | -                       |
| Gal       | 4.27                          | 3.40 | 3.54 | 3.97<br>(d, $J = 3.2$ Hz, 2H) | n/a                | n/a | -                | -  | -  | -                             | -                       |
| GlcNAc    | 4.55                          | 3.64 | 3.54 | 3.31                          | n/a                | n/a | -                | -  | -  | -                             | 1.91 - 1.81<br>(m, 12H) |
| Gal(2)    | 4.39                          | 3.51 | n/a  | 3.72                          | n/a                | n/a | -                | -  | -  | -                             | -                       |
| GlcNAc(2) | 4.46<br>(d, $J = 8.3$ Hz, 1H) | 3.60 | 3.54 | 3.43                          | n/a                | n/a | -                | -  | -  | -                             | 1.91 - 1.81<br>(m, 12H) |
| Gal(3)    | 4.27                          | 3.40 | 3.54 | 3.97<br>(d, $J = 3.2$ Hz, 2H) | n/a                | n/a | -                | -  | -  | -                             | -                       |
| GlcNAc(3) | 4.56                          | 3.64 | 3.54 | 3.31                          | n/a                | n/a | -                | -  | -  | -                             | 1.91 - 1.81<br>(m, 12H) |
| Gal(4)    | 4.39                          | 3.51 | n/a  | 3.72                          | n/a                | n/a | -                | -  | -  | -                             | -                       |
| GlcNAc(4) | 4.40                          | 3.51 | 3.38 | 3.28                          | n/a                | n/a | -                | -  | -  | -                             | 1.91 - 1.81<br>(m, 12H) |
| Fuc(1)    | 5.15<br>(d, $J = 2.2$ Hz, 2H) | 3.65 | n/a  | n/a                           | 4.09               | -   | -                | -  | -  | 1.07<br>(d, $J = 6.6$ Hz, 6H) | -                       |
| Fuc(2)    | 5.15<br>(d, $J = 2.2$ Hz, 2H) | 3.65 | n/a  | n/a                           | 4.09               | -   | -                | -  | -  | 1.07<br>(d, $J = 6.6$ Hz, 6H) | -                       |

$^{13}\text{C}$  from BSHSQC (150 MHz,  $\text{D}_2\text{O}$ ):  $\delta$  (ppm)

|           | C1     |
|-----------|--------|
| Glc       | 92.70  |
| Gal       | 102.79 |
| GlcNAc    | 102.59 |
| Gal(2)    | 100.17 |
| GlcNAc(2) | 100.84 |
| Gal(3)    | 102.79 |
| GlcNAc(3) | 102.59 |
| Gal(4)    | 100.17 |
| GlcNAc(4) | 101.01 |
| Fuc(1)    | 99.29  |
| Fuc(2)    | 99.29  |

<sup>[a]</sup> Not assigned

<sup>[b]</sup> Not applicable

MALDI TOF-MS  $m/z$  calcd  $\text{C}_{95}\text{H}_{152}\text{N}_8\text{O}_{59}\text{Na}^-$  ( $\text{M} + \text{Na}$ )<sup>+</sup> exact 2371.9037, found 2370.7754.

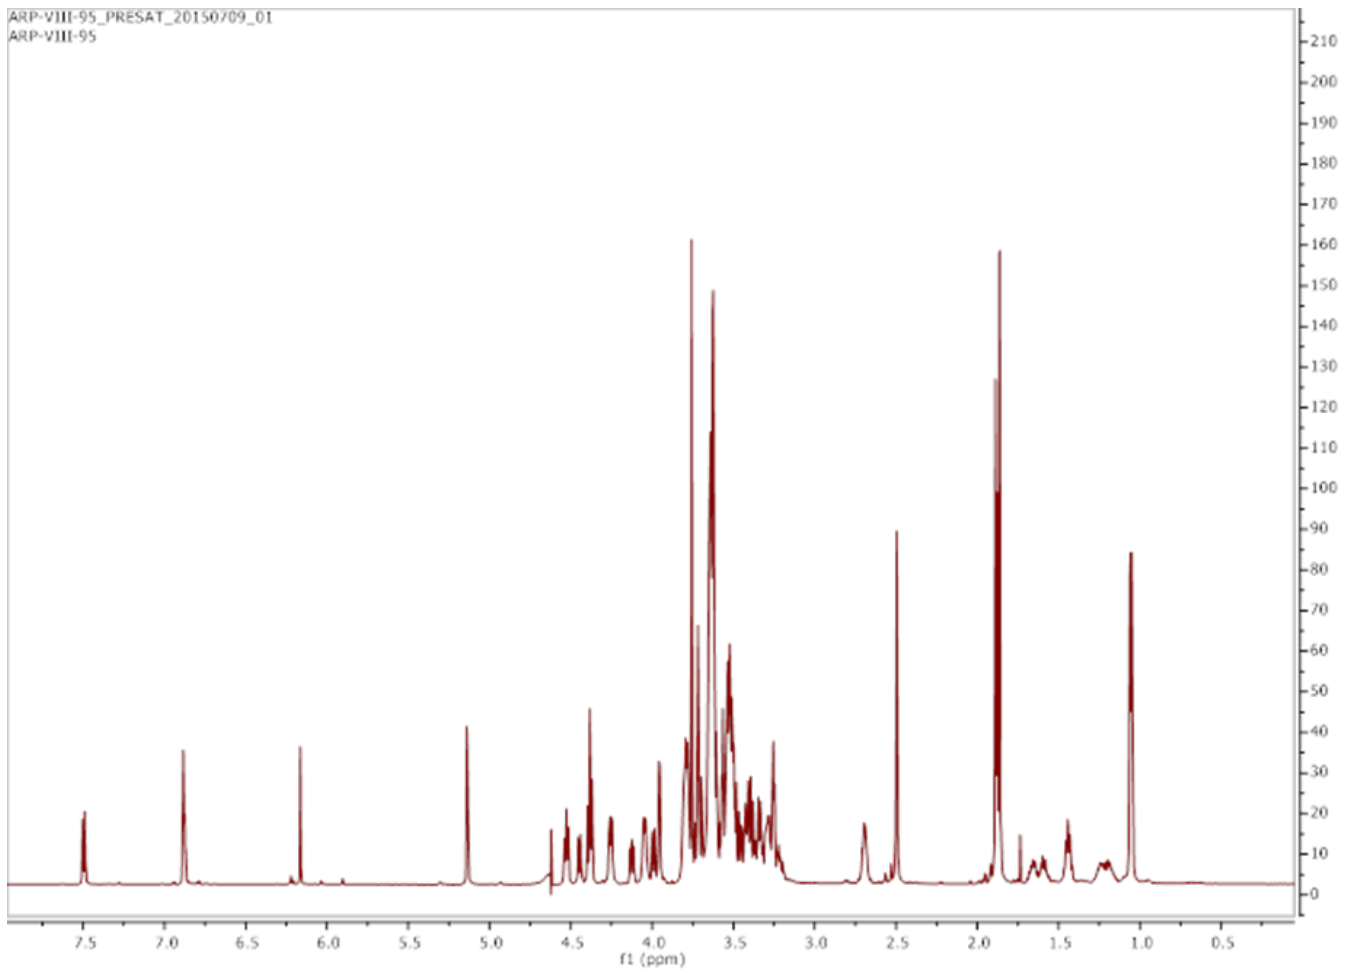

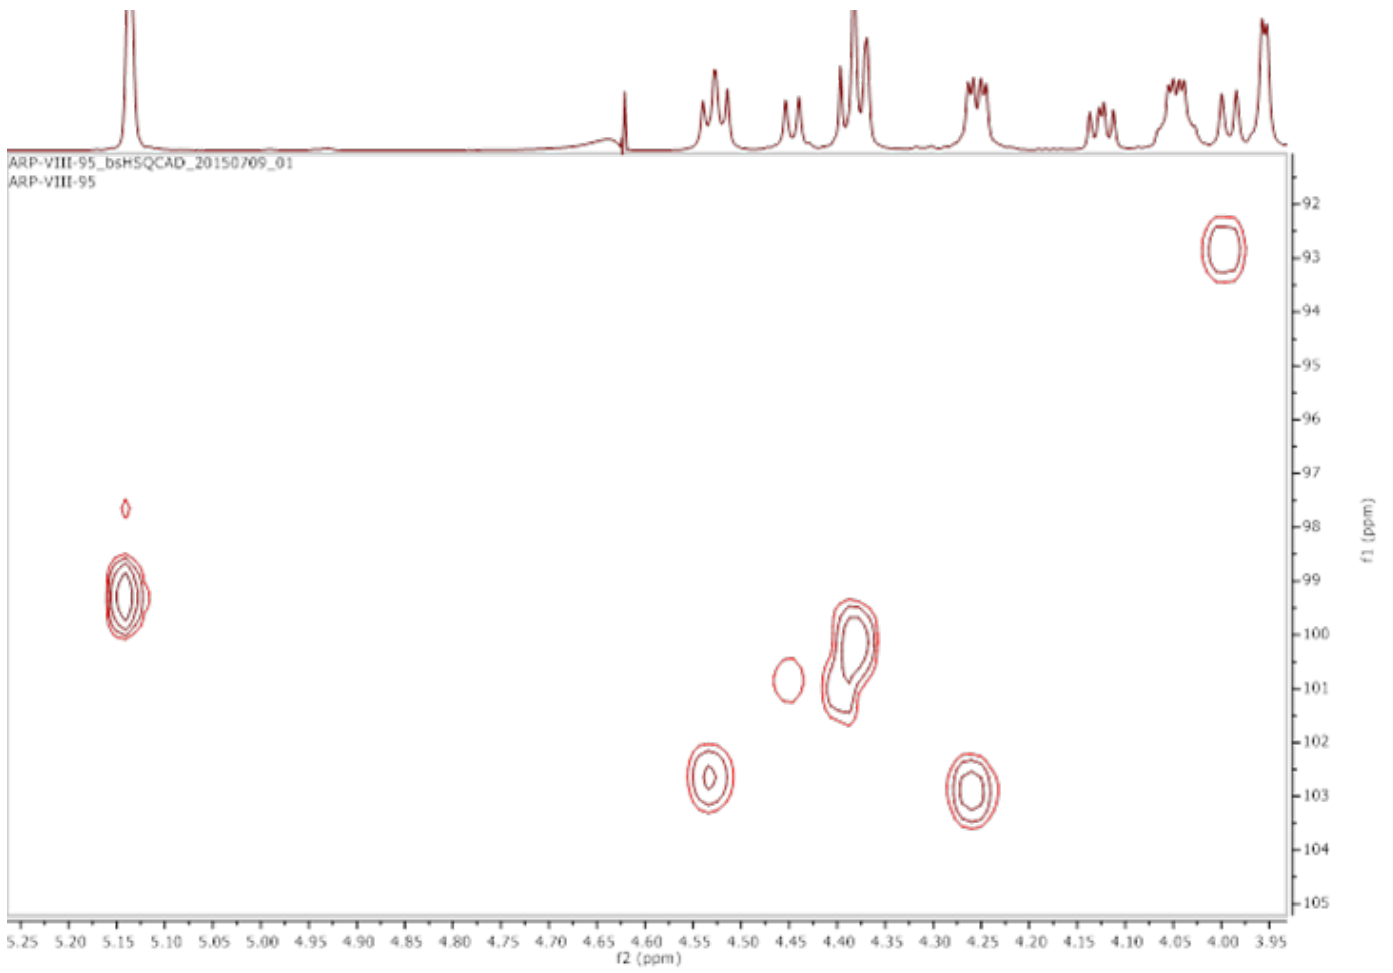

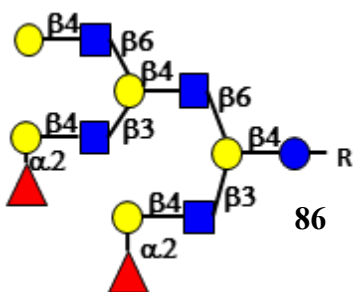

$^1\text{H}$  (800 MHz,  $\text{D}_2\text{O}$ ):  $\delta$  (ppm)

|                  | H1                            | H2   | H3   | H4                            | H5                 | H6  | H7               | H8 | H9 | $\text{CH}_3$                 | NHAc                    |
|------------------|-------------------------------|------|------|-------------------------------|--------------------|-----|------------------|----|----|-------------------------------|-------------------------|
| <b>Glc</b>       | 4.00<br>(d, $J = 8.3$ Hz, 1H) | 3.34 | 3.41 | 3.48                          | n/a <sup>[a]</sup> | n/a | - <sup>[b]</sup> | -  | -  | -                             | -                       |
| <b>Gal</b>       | 4.28                          | 3.43 | 3.54 | 3.97<br>(d, $J = 3.2$ Hz, 2H) | n/a                | n/a | -                | -  | -  | -                             | -                       |
| <b>GlcNAc</b>    | 4.55                          | 3.66 | 3.54 | 3.31                          | n/a                | n/a | -                | -  | -  | -                             | 1.91 - 1.81<br>(m, 12H) |
| <b>Gal(2)</b>    | 4.41<br>(d, $J = 7.2$ Hz, 2H) | 3.51 | n/a  | 3.72                          | n/a                | n/a | -                | -  | -  | -                             | -                       |
| <b>GlcNAc(2)</b> | 4.46<br>(d, $J = 8.2$ Hz, 1H) | 3.60 | 3.56 | 3.43                          | n/a                | n/a | -                | -  | -  | -                             | 1.91 - 1.81<br>(m, 12H) |
| <b>Gal(3)</b>    | 4.27                          | 3.43 | 3.54 | 3.97<br>(d, $J = 3.2$ Hz, 2H) | n/a                | n/a | -                | -  | -  | -                             | -                       |
| <b>GlcNAc(3)</b> | 4.56                          | 3.64 | 3.54 | 3.31                          | n/a                | n/a | -                | -  | -  | -                             | 1.91 - 1.81<br>(m, 12H) |
| <b>Gal(4)</b>    | 4.41<br>(d, $J = 7.2$ Hz, 2H) | 3.51 | n/a  | 3.72                          | n/a                | n/a | -                | -  | -  | -                             | -                       |
| <b>GlcNAc(4)</b> | 4.44<br>(d, $J = 8.1$ Hz, 1H) | 3.58 | 3.54 | 3.42                          | n/a                | n/a | -                | -  | -  | -                             | 1.91 - 1.81<br>(m, 12H) |
| <b>Gal(5)</b>    | 4.31                          | 3.39 | 3.51 | 3.77                          | n/a                | n/a | -                | -  | -  | -                             | -                       |
| <b>Fuc(1)</b>    | 5.15                          | 3.65 | n/a  | n/a                           | 4.09               | -   | -                | -  | -  | 1.07<br>(d, $J = 6.6$ Hz, 6H) | -                       |
| <b>Fuc(2)</b>    | 5.15                          | 3.65 | n/a  | n/a                           | 4.09               | -   | -                | -  | -  | 1.07<br>(d, $J = 6.6$ Hz, 6H) | -                       |

$^{13}\text{C}$  from BSHSQC (200 MHz,  $\text{D}_2\text{O}$ ):  $\delta$  (ppm)

|                  | C1     |
|------------------|--------|
| <b>Glc</b>       | 92.88  |
| <b>Gal</b>       | 102.89 |
| <b>GlcNAc</b>    | 102.62 |
| <b>Gal(2)</b>    | 100.16 |
| <b>GlcNAc(2)</b> | 100.94 |
| <b>Gal(3)</b>    | 102.89 |
| <b>GlcNAc(3)</b> | 102.62 |
| <b>Gal(4)</b>    | 100.16 |
| <b>GlcNAc(4)</b> | 100.91 |
| <b>Gal(5)</b>    | 102.77 |
| <b>Fuc(1)</b>    | 99.29  |
| <b>Fuc(2)</b>    | 99.29  |

<sup>[a]</sup> Not assigned

<sup>[b]</sup> Not applicable

MALDI TOF-MS  $m/z$  calcd  $\text{C}_{101}\text{H}_{162}\text{N}_8\text{O}_{64}\text{Na}^-$  ( $\text{M} + \text{Na}$ )<sup>+</sup> exact 2533.9566, found 2534.6438.

ARP-VIII-56\_PRESAT\_20150713\_01  
ARP-VIII-56

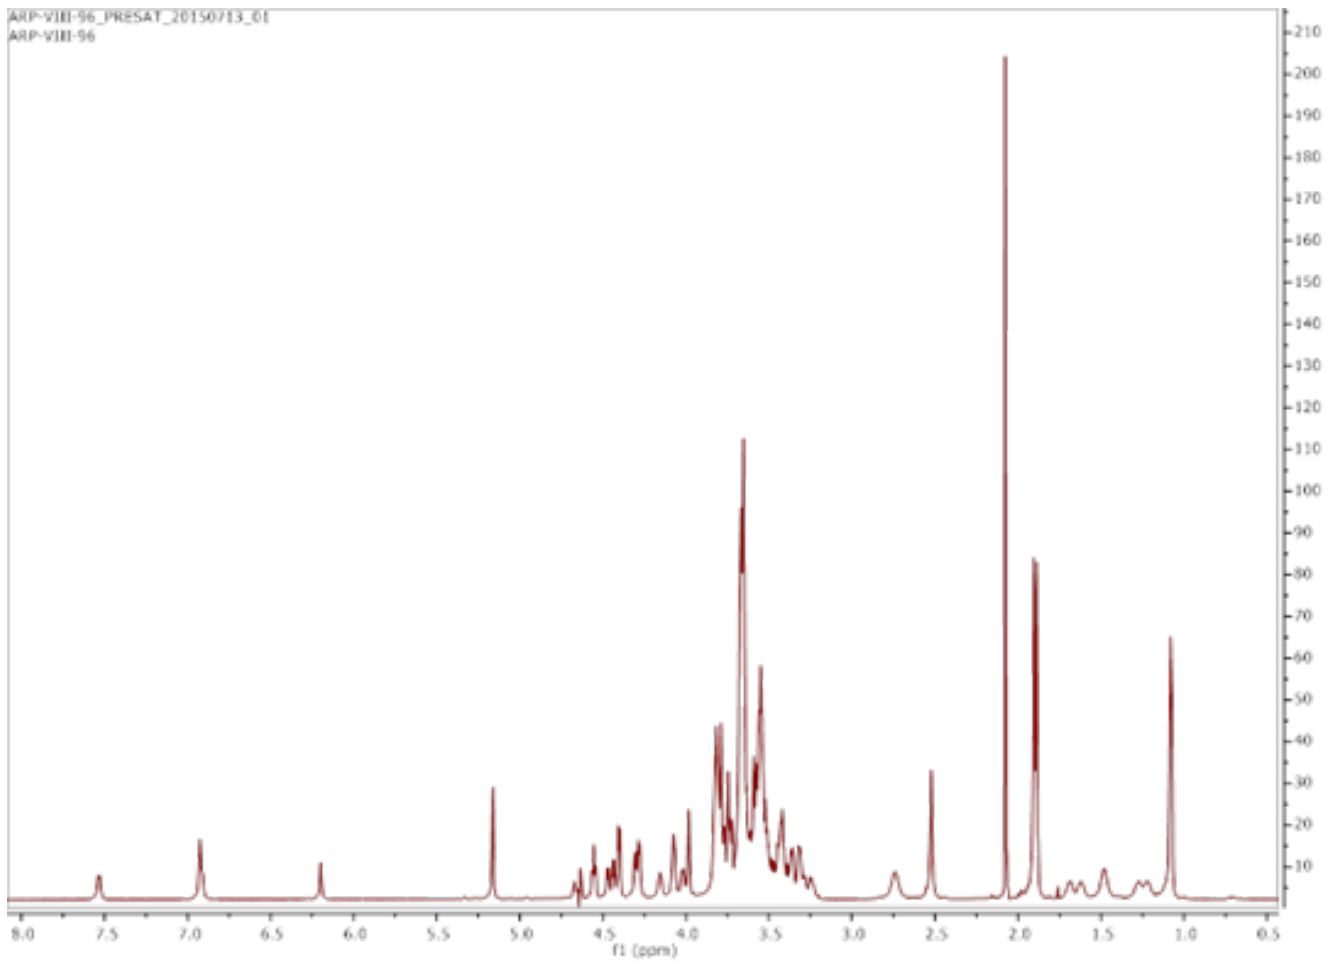

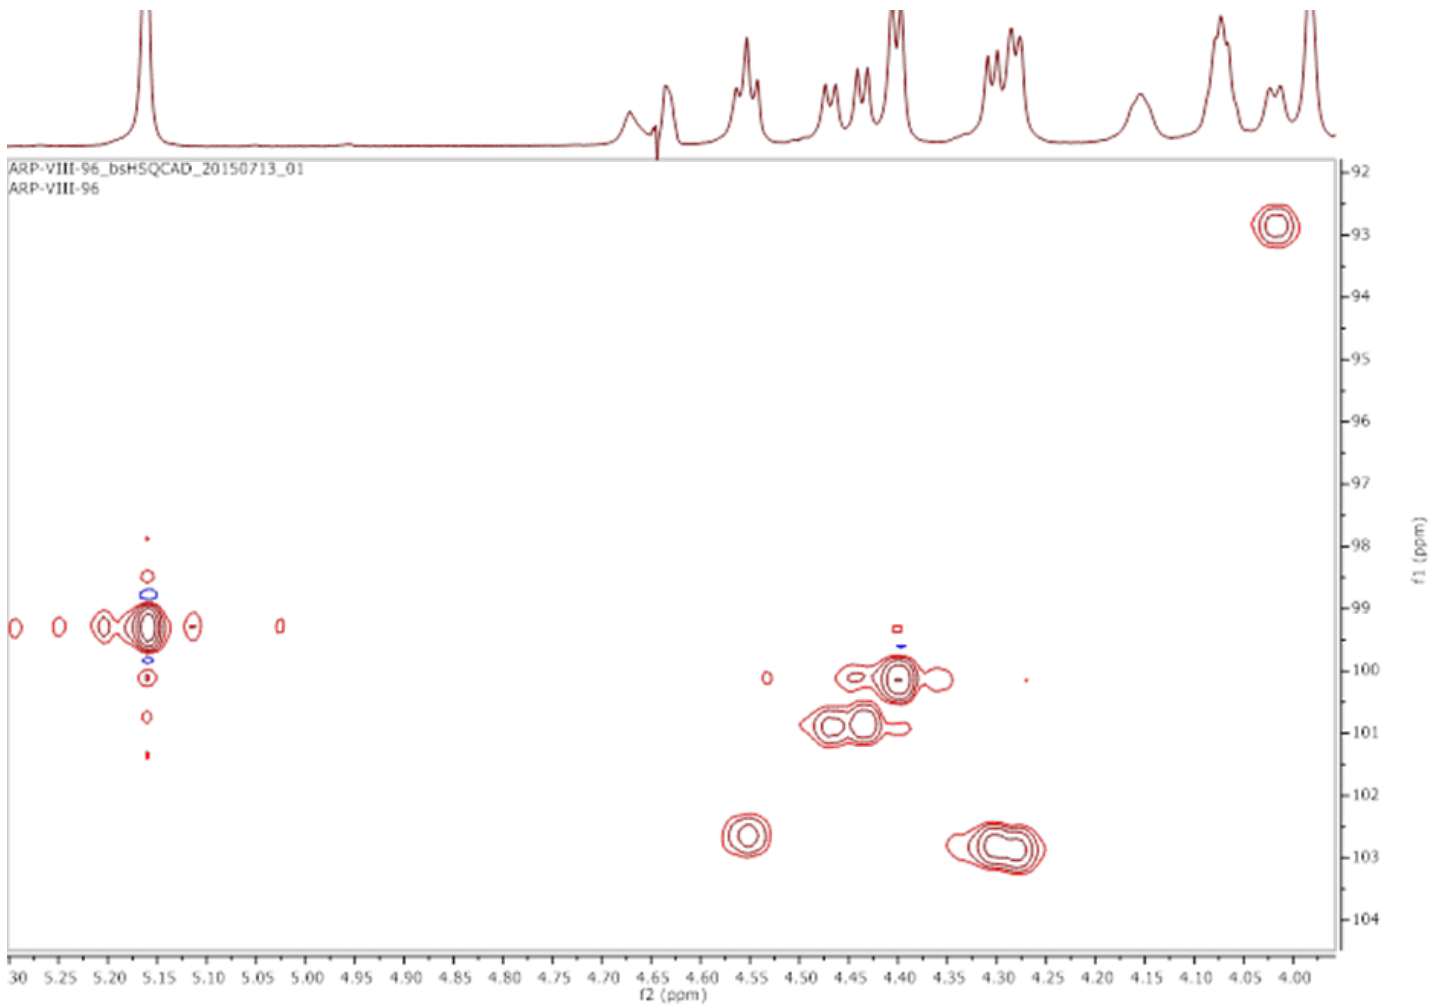



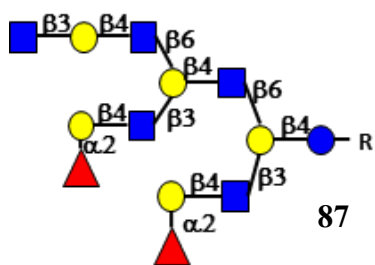

$^1\text{H}$  (800 MHz,  $\text{D}_2\text{O}$ ):  $\delta$  (ppm)

|           | H1                            | H2   | H3   | H4   | H5                 | H6  | H7               | H8 | H9 | $\text{CH}_3$ | NHAc                    |
|-----------|-------------------------------|------|------|------|--------------------|-----|------------------|----|----|---------------|-------------------------|
| Glc       | 4.00                          | 3.34 | 3.41 | 3.48 | n/a <sup>[a]</sup> | n/a | - <sup>[b]</sup> | -  | -  | -             | -                       |
| Gal       | 4.28                          | 3.41 | 3.54 | 3.98 | n/a                | n/a | -                | -  | -  | -             | -                       |
| GlcNAc    | 4.55                          | 3.65 | 3.54 | 3.31 | n/a                | n/a | -                | -  | -  | -             | 1.91 - 1.81<br>(m, 15H) |
| Gal(2)    | 4.39                          | 3.52 | 3.65 | 3.72 | n/a                | n/a | -                | -  | -  | -             | -                       |
| GlcNAc(2) | 4.46<br>(d, $J = 8.2$ Hz, 1H) | 3.60 | 3.54 | 3.44 | n/a                | n/a | -                | -  | -  | -             | 1.91 - 1.81<br>(m, 15H) |
| Gal(3)    | 4.28                          | 3.41 | 3.54 | 3.98 | n/a                | n/a | -                | -  | -  | -             | -                       |
| GlcNAc(3) | 4.55                          | 3.65 | 3.54 | 3.31 | n/a                | n/a | -                | -  | -  | -             | 1.91 - 1.81<br>(m, 15H) |
| Gal(4)    | 4.39                          | 3.52 | 3.65 | 3.72 | n/a                | n/a | -                | -  | -  | -             | -                       |
| GlcNAc(4) | 4.41                          | 3.56 | n/a  | 3.41 | n/a                | n/a | -                | -  | -  | -             | 1.91 - 1.81<br>(m, 15H) |
| Gal(5)    | 4.28                          | 3.41 | 3.54 | 3.98 | n/a                | n/a | -                | -  | -  | -             | -                       |
| GlcNAc(5) | 4.52                          | 3.59 | 3.41 | 3.29 | n/a                | n/a | -                | -  | -  | -             | 1.91 - 1.81<br>(m, 15H) |
| Fuc(1)    | 5.15                          | 3.65 | n/a  | n/a  | 4.09               | -   | -                | -  | -  | 1.07          | -                       |
| Fuc(2)    | 5.15                          | 3.65 | n/a  | n/a  | 4.09               | -   | -                | -  | -  | 1.07          | -                       |

$^{13}\text{C}$  from BSHSQC (200 MHz,  $\text{D}_2\text{O}$ ):  $\delta$  (ppm)

|           | C1     |
|-----------|--------|
| Glc       | 92.81  |
| Gal       | 102.95 |
| GlcNAc    | 102.62 |
| Gal(2)    | 100.11 |
| GlcNAc(2) | 101.00 |
| Gal(3)    | 102.95 |
| GlcNAc(3) | 102.63 |
| Gal(4)    | 100.11 |
| GlcNAc(4) | 100.92 |
| Gal(5)    | 102.95 |
| GlcNAc(5) | 102.84 |
| Fuc(1)    | 99.37  |
| Fuc(2)    | 99.37  |

<sup>[a]</sup> Not assigned

<sup>[b]</sup> Not applicable

MALDI TOF-MS  $m/z$  calcd  $\text{C}_{109}\text{H}_{175}\text{N}_9\text{O}_{69}\text{Na}^-$  ( $M + \text{Na}$ )<sup>+</sup> exact 2737.0359, found 2736.4907.

ARP-IX-1\_PRESAT\_20150730\_01  
ARP-IX-1

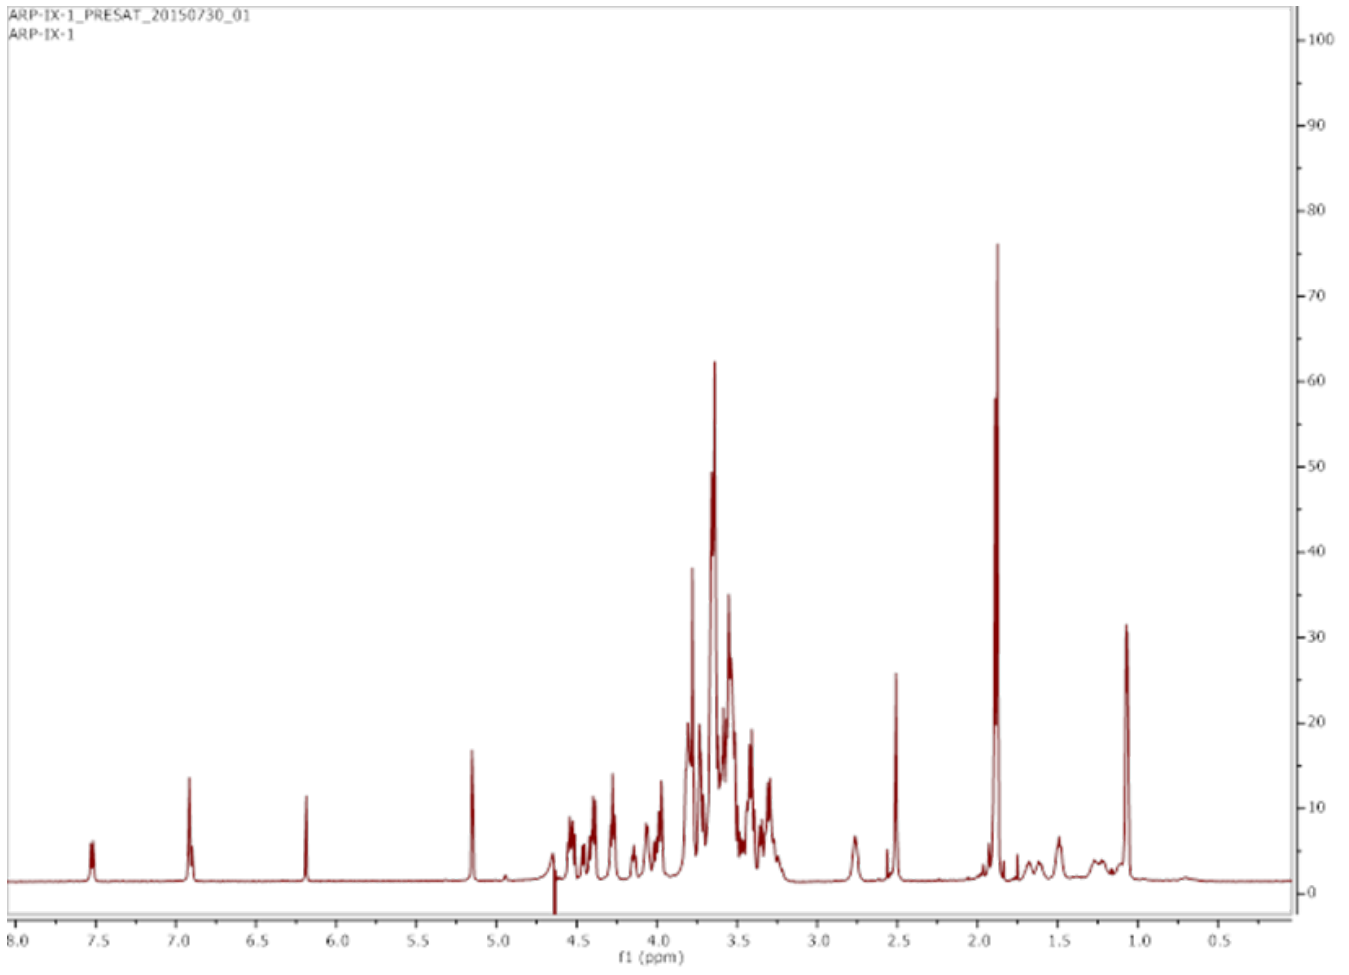

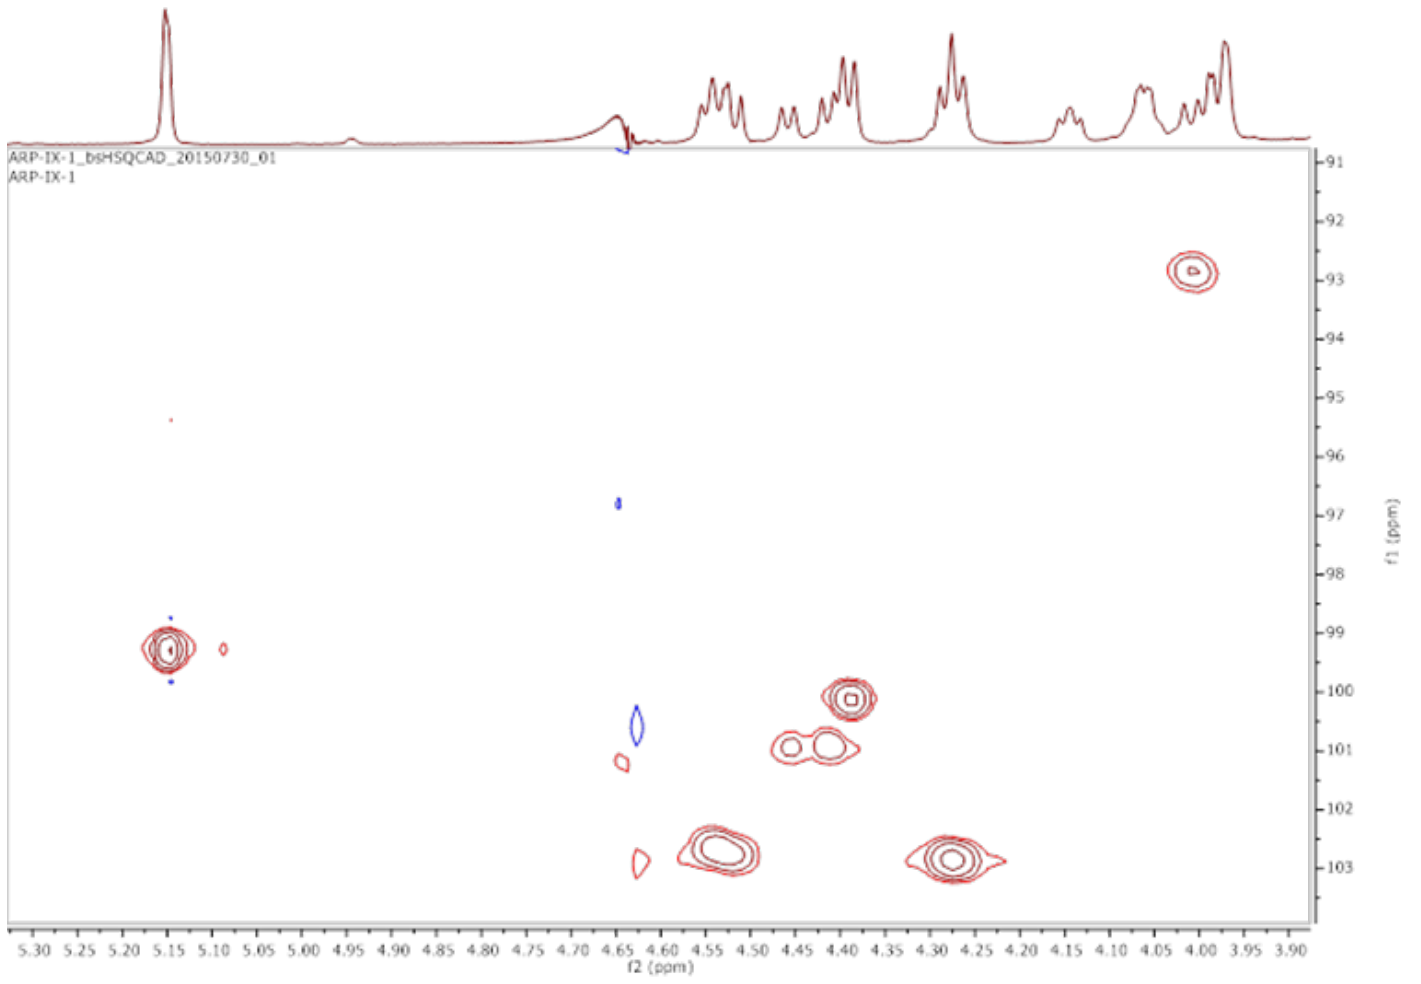

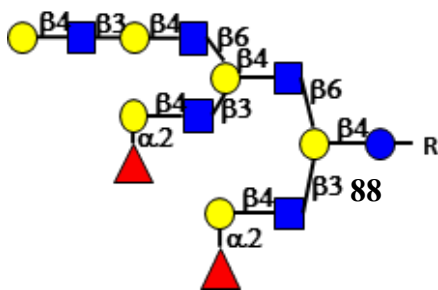

$^1\text{H}$  (800 MHz,  $\text{D}_2\text{O}$ ):  $\delta$  (ppm)

|           | H1   | H2   | H3   | H4   | H5                 | H6  | H7               | H8 | H9 | $\text{CH}_3$ | NHAc                    |
|-----------|------|------|------|------|--------------------|-----|------------------|----|----|---------------|-------------------------|
| Glc       | 4.00 | 3.34 | 3.41 | 3.48 | n/a <sup>[a]</sup> | n/a | - <sup>[b]</sup> | -  | -  | -             | -                       |
| Gal       | 4.28 | 3.43 | 3.54 | 3.98 | n/a                | n/a | -                | -  | -  | -             | -                       |
| GlcNAc    | 4.55 | 3.65 | n/a  | n/a  | n/a                | n/a | -                | -  | -  | -             | 1.91 - 1.81<br>(m, 15H) |
| Gal(2)    | 4.39 | 3.52 | 3.65 | 3.72 | n/a                | n/a | -                | -  | -  | -             | -                       |
| GlcNAc(2) | 4.46 | 3.60 | 3.54 | 3.44 | n/a                | n/a | -                | -  | -  | -             | 1.91 - 1.81<br>(m, 15H) |
| Gal(3)    | 4.28 | 3.41 | 3.54 | 3.98 | n/a                | n/a | -                | -  | -  | -             | -                       |
| GlcNAc(3) | 4.55 | 3.65 | 3.54 | 3.31 | n/a                | n/a | -                | -  | -  | -             | 1.91 - 1.81<br>(m, 15H) |
| Gal(4)    | 4.39 | 3.52 | 3.65 | 3.72 | n/a                | n/a | -                | -  | -  | -             | -                       |
| GlcNAc(4) | 4.41 | 3.52 | n/a  | 3.41 | n/a                | n/a | -                | -  | -  | -             | 1.91 - 1.81<br>(m, 15H) |
| Gal(5)    | 4.28 | 3.43 | 3.55 | 3.98 | n/a                | n/a | -                | -  | -  | -             | -                       |
| GlcNAc(5) | 4.55 | 3.65 | n/a  | n/a  | n/a                | n/a | -                | -  | -  | -             | 1.91 - 1.81<br>(m, 15H) |
| Gal(6)    | 4.33 | 3.39 | 3.52 | 3.78 | n/a                | n/a | -                | -  | -  | -             | -                       |
| Fuc(1)    | 5.15 | 3.65 | n/a  | n/a  | 4.09               | -   | -                | -  | -  | 1.07          | -                       |
| Fuc(2)    | 5.15 | 3.65 | n/a  | n/a  | 4.09               | -   | -                | -  | -  | 1.07          | -                       |

$^{13}\text{C}$  from BSHSQC (200 MHz,  $\text{D}_2\text{O}$ ):  $\delta$  (ppm)

|           | C1     |
|-----------|--------|
| Glc       | 92.77  |
| Gal       | 102.89 |
| GlcNAc    | 102.69 |
| Gal(2)    | 100.18 |
| GlcNAc(2) | 101.97 |
| Gal(3)    | 102.89 |
| GlcNAc(3) | 102.69 |
| Gal(4)    | 100.18 |
| GlcNAc(4) | 100.97 |
| Gal(5)    | 102.89 |
| GlcNAc(5) | 102.69 |
| Gal(6)    | 102.82 |
| Fuc(1)    | 99.37  |
| Fuc(2)    | 99.37  |

<sup>[a]</sup> Not assigned

<sup>[b]</sup> Not applicable

MALDI TOF-MS  $m/z$  calcd  $\text{C}_{115}\text{H}_{185}\text{N}_9\text{O}_{74}\text{Na}^-$  ( $\text{M} + \text{Na}$ )<sup>+</sup> exact 2899.0887, found 2900.7866.

ARP-IX-9\_PRESAT\_20150807\_01  
ARP-IX-9

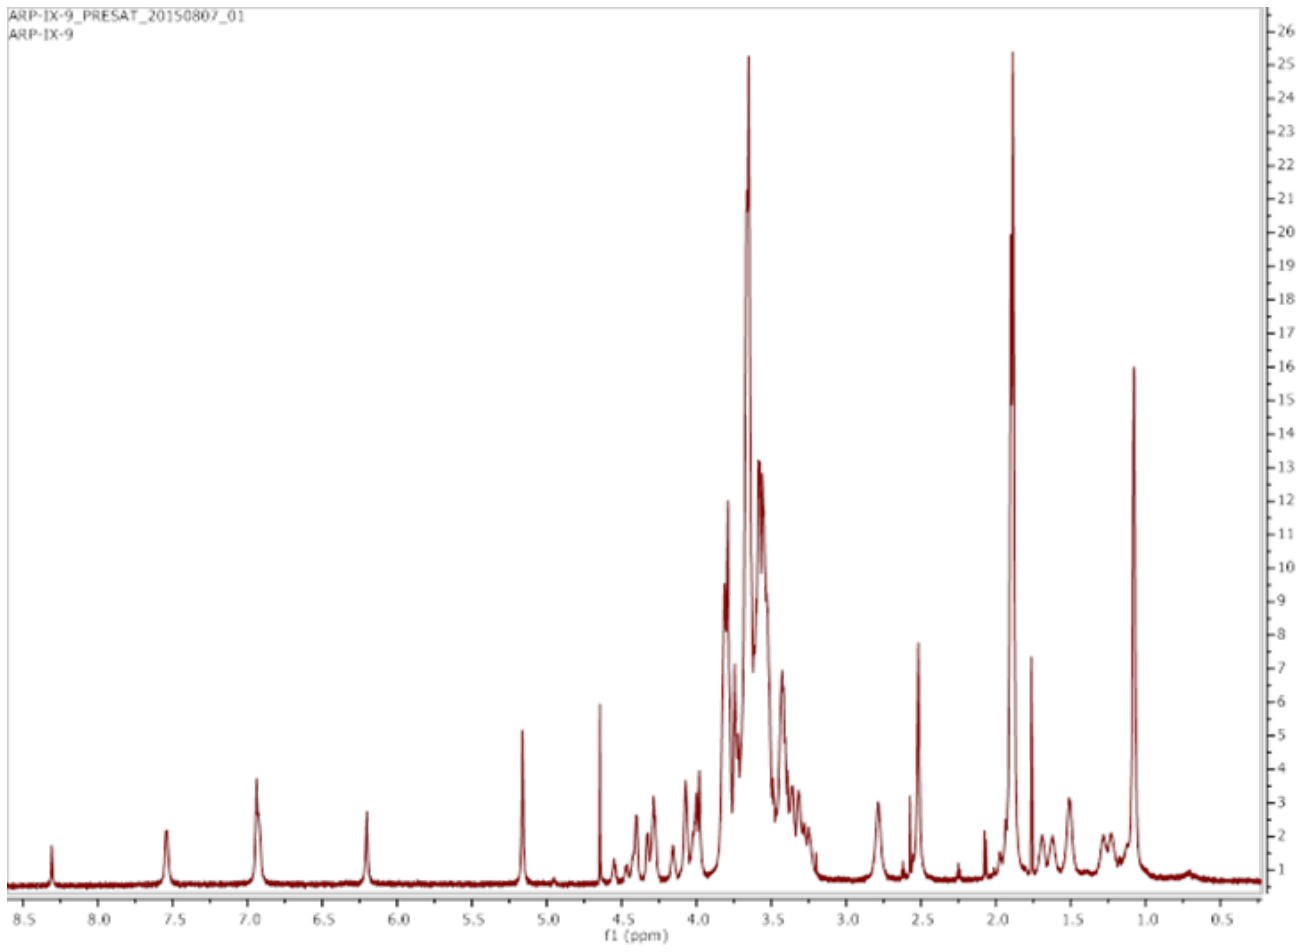

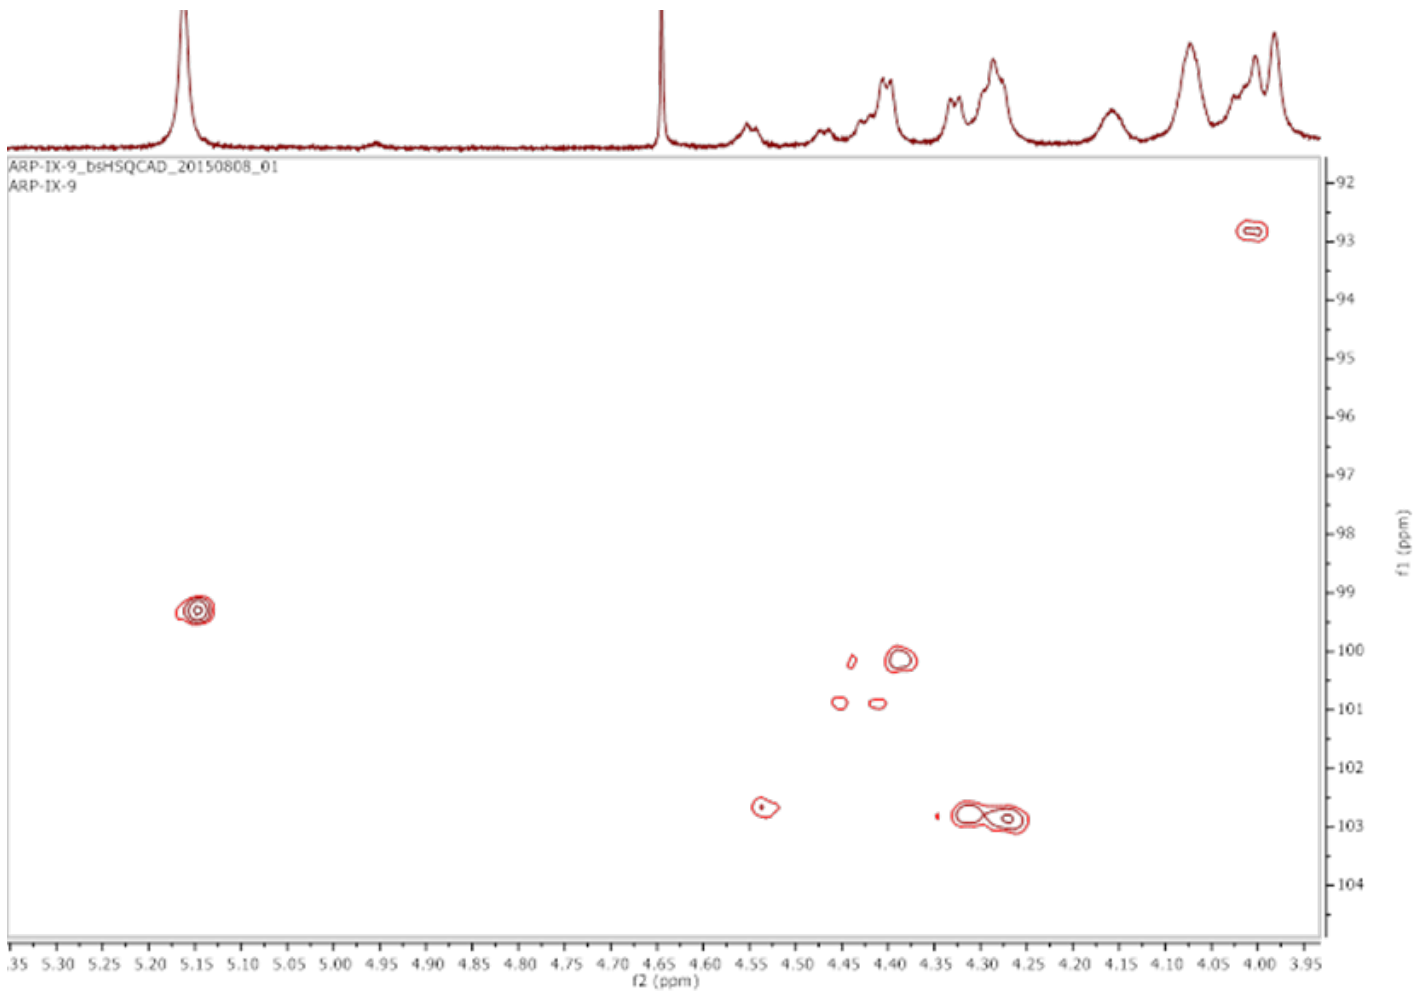

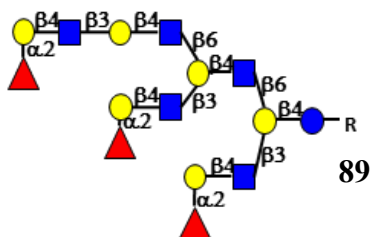

<sup>1</sup>H (900 MHz, D<sub>2</sub>O): δ (ppm)

|           | H1                          | H2   | H3   | H4   | H5                 | H6  | H7               | H8 | H9 | CH <sub>3</sub> | NHAc                    |
|-----------|-----------------------------|------|------|------|--------------------|-----|------------------|----|----|-----------------|-------------------------|
| Glc       | 4.00<br>(d, J = 9.6 Hz, 1H) | 3.34 | 3.41 | 3.48 | n/a <sup>[a]</sup> | n/a | - <sup>[b]</sup> | -  | -  | -               | -                       |
| Gal       | 4.27                        | 3.42 | 3.54 | 3.98 | n/a                | n/a | -                | -  | -  | -               | -                       |
| GlcNAc    | 4.53                        | 3.65 | 3.54 | 3.31 | n/a                | n/a | -                | -  | -  | -               | 1.91 - 1.81<br>(m, 15H) |
| Gal(2)    | 4.38                        | 3.52 | n/a  | 3.73 | n/a                | n/a | -                | -  | -  | -               | -                       |
| GlcNAc(2) | 4.46<br>(d, J = 8.2 Hz, 1H) | 3.60 | 3.54 | 3.44 | n/a                | n/a | -                | -  | -  | -               | 1.91 - 1.81<br>(m, 15H) |
| Gal(3)    | 4.27                        | 3.42 | 3.54 | 3.98 | n/a                | n/a | -                | -  | -  | -               | -                       |
| GlcNAc(3) | 4.53                        | 3.65 | 3.54 | 3.31 | n/a                | n/a | -                | -  | -  | -               | 1.91 - 1.81<br>(m, 15H) |
| Gal(4)    | 4.38                        | 3.52 | n/a  | 3.73 | n/a                | n/a | -                | -  | -  | -               | -                       |
| GlcNAc(4) | 4.40<br>(d, J = 8.0 Hz, 1H) | 3.57 | 3.52 | 3.41 | n/a                | n/a | -                | -  | -  | -               | 1.91 - 1.81<br>(m, 15H) |
| Gal(5)    | 4.27                        | 3.42 | 3.54 | 3.98 | n/a                | n/a | -                | -  | -  | -               | -                       |
| GlcNAc(5) | 4.53                        | 3.65 | 3.54 | 3.31 | n/a                | n/a | -                | -  | -  | -               | 1.91 - 1.81<br>(m, 15H) |
| Gal(6)    | 4.38                        | 3.52 | n/a  | 3.73 | n/a                | n/a | -                | -  | -  | -               | -                       |
| Fuc(1)    | 5.15                        | 3.65 | n/a  | n/a  | 4.06               | -   | -                | -  | -  | 1.07            | -                       |
| Fuc(2)    | 5.15                        | 3.65 | n/a  | n/a  | 4.06               | -   | -                | -  | -  | 1.07            | -                       |
| Fuc(3)    | 5.15                        | 3.65 | n/a  | n/a  | 4.06               | -   | -                | -  | -  | 1.07            | -                       |

<sup>13</sup>C from BSHSQC (225 MHz, D<sub>2</sub>O): δ (ppm)

|           | C1     |
|-----------|--------|
| Glc       | 95.50  |
| Gal       | 105.63 |
| GlcNAc    | 105.30 |
| Gal(2)    | 102.94 |
| GlcNAc(2) | 103.63 |
| Gal(3)    | 105.63 |
| GlcNAc(3) | 105.30 |
| Gal(4)    | 102.94 |
| GlcNAc(4) | 103.56 |
| Gal(5)    | 105.63 |
| GlcNAc(5) | 105.30 |
| Gal(6)    | 102.94 |
| Fuc(1)    | 101.99 |
| Fuc(2)    | 101.99 |
| Fuc(3)    | 101.99 |

<sup>[a]</sup> Not assigned

<sup>[b]</sup> Not applicable

MALDI TOF-MS *m/z* calcd C<sub>121</sub>H<sub>195</sub>N<sub>9</sub>O<sub>78</sub>Na (M + Na)<sup>+</sup> exact 3045.1467, found 3045.0764.

AP\_IX\_13\_presat\_20150813  
AP-IX-13

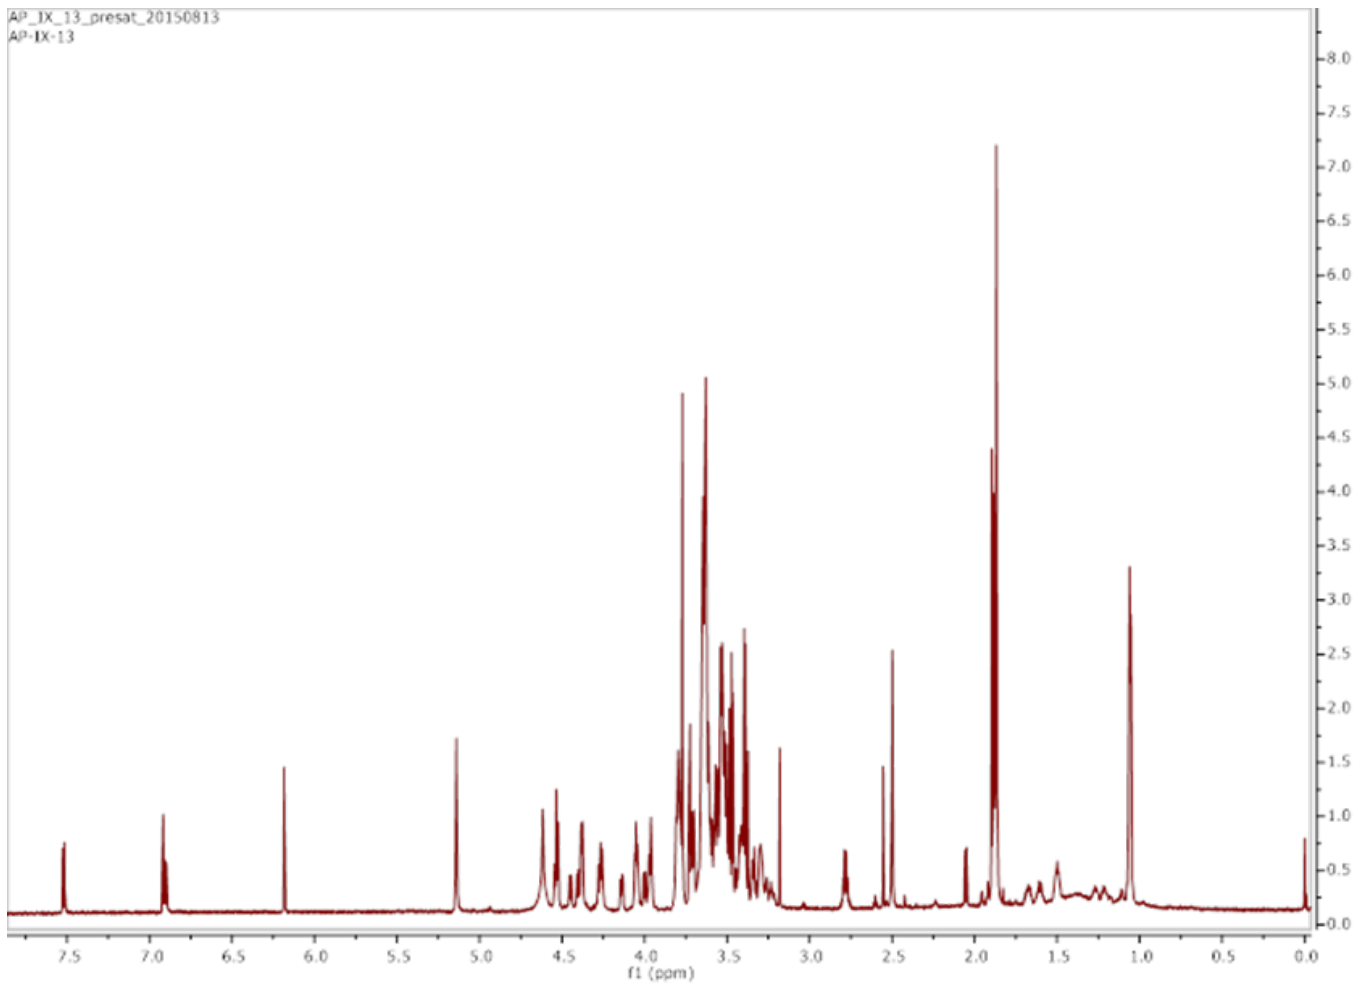



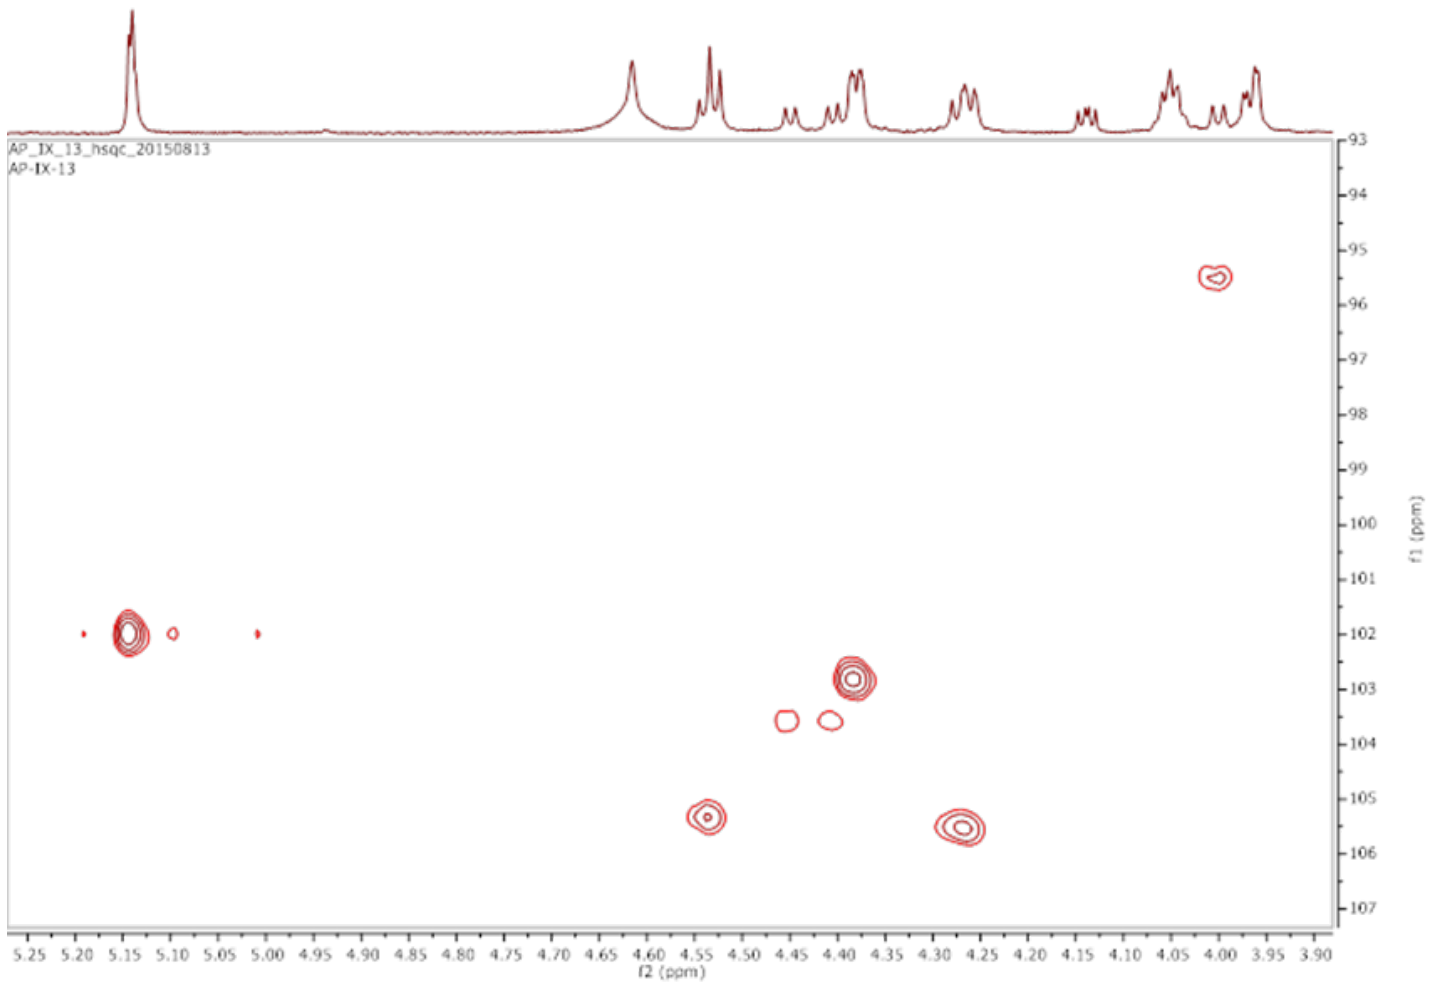

## 4. Microarray Procedure

### 4.a. Materials and Methods

All compounds were printed on NHS-activated Nexterion® slides purchased from Schott using a Scienion S3 non-contact microarray printer. Biotinylated plant lectins *Aleuria Aurantia* (AAL), *Ulex Europaeus* Agglutinin I (UEA), and *Sambucus Nigra* Agglutinin (SNA) were purchased from Vector Labs. Human galectin-9 was purchased from R&D Systems. Biotinylated mouse anti-galectin-9 antibody was purchased from PeproTech. Biotinylated Cholera Toxin B (CTB) was purchased from Sigma, biotinylated anti-GST antibody was purchased from Abcam, and streptavidin-AlexaFluor® 635 conjugate was purchased from Thermo Fisher. Stained slides were analyzed using a GenePix 4000B plate reader manufactured by Axon Instruments.

Individual targets were dissolved in a sodium phosphate buffer (pH 9.0, 50 mM) and were printed in replicates of six at a concentration of 100  $\mu\text{M}$  with spot volume  $\sim 400$   $\mu\text{L}$ . Slides were printed with 24 subarrays (3 x 8) containing 396 spots (18 x 22). Post printing, slides were incubated in a humidity chamber for 24 h and then blocked for 1 h with a 5 mM ethanolamine in a Tris buffer (pH 9.0, 50 mM). Blocked slides were rinsed with DI water, spun dry, and kept in a desiccator at room temperature for future use.

### 4.b. VP8\* Expression

The VP8\* sequences (amino acids 64-224) of the Australian CRW-8 porcine (GenBank accession: L07888) were synthesized by GenScript (GenScript USA Inc., Piscataway, NJ) and then sub-cloned into the expression vector pGEX-4T- between the BamH I and EcoRI restriction sites. After confirmation of the inserts through DNA sequencing, the GST-VP8\* fusion protein was expressed in *E. coli* BL21 with induction of IPTG (0.4 mM) at room temperature (22 °C) overnight. The GST-VP8\* fusion protein was purified using Glutathione Sepharose 4 Fast Flow (GE Healthcare Life Sciences, Piscataway, NJ) according to the manufacturer's protocol.

### 4.c. Screening Procedure

**Plant Lectins:** Screening solutions of biotinylated UEA, SNA, and AAL were created by premixing streptavidin-AlexaFluor® 635 at a 1:3 ratio in TSM binding buffer (20 mM Tris Cl, 150 mM NaCl, 2 mM  $\text{CaCl}_2$ , 2 mM  $\text{MgCl}_2$ , 0.05% Tween, and 1 g/L BSA, pH 7.4). Final lectin concentrations were 10  $\mu\text{g mL}^{-1}$ , 10  $\mu\text{g mL}^{-1}$ , and 1  $\mu\text{g mL}^{-1}$ , respectively. Plant lectin stock solution (100  $\mu\text{L}$ ) was added to each subarray and was allowed to incubate at room temperature in the dark for 1 h, after which the slide was washed consecutively with TSM wash buffer (20 mM Tris Cl, 150 mM NaCl, 2 mM  $\text{CaCl}_2$ , 2 mM  $\text{MgCl}_2$ , and 0.05% Tween, pH 7.4), TSM buffer (20 mM Tris Cl, 50 mM NaCl, 2 mM  $\text{CaCl}_2$ , 2 mM, and  $\text{MgCl}_2$ , pH 7.4), and DI water, and spun dry as described in the literature (9). The slides were stored in the dark prior to analysis.

**Galectins-9:** Galectin-9 solutions were made by dissolving the lectin in a TBS buffer (25 mM Tris, 0.15 M NaCl, pH 7.2) with 0.1% BSA and 0.05% Tween. Antibody and fluorophore solutions (5  $\mu\text{g mL}^{-1}$ ) were created by dissolving biotinylated anti-Gal-9 antibody and the AlexaFluor in a TBS buffer containing 0.1% BSA and 0.05% Tween; these solutions were not premixed. For galectin staining, galectin solution (100  $\mu\text{L}$ ) was added to a subarray and was allowed to incubate at room temperature for 1 h. After this time, the lectin was washed away using the same protocol as used for the plant lectins. To the dried plate anti-Gal-9 antibody (100  $\mu\text{L}$ ) was added and incubated for 1 h. Following washing the plate, streptavidin fluorophore (100  $\mu\text{L}$ , 5  $\mu\text{g mL}^{-1}$ ) was added and incubated for 1 h.

*Cholera Toxin B*: Working solutions of biotinylated CTB were made by dissolving the appropriate amount of the protein in a PBS (10 mM, pH 7.4) buffer containing 0.1% BSA and 0.05% Tween. A streptavidin fluorophore working solution ( $5 \mu\text{g mL}^{-1}$ ) was prepared in the same buffer. To screen the array, CTB solution ( $100 \mu\text{L}$ ) was added to a subarray and incubated for 1 h. The plate was washed and next the fluorophore ( $100 \mu\text{L}$ ) was added. After incubation of 1 h, the plate was washed, dried, and analyzed.

*Adhesion VP8\* from Porcine CRW-8*: Stock solution of VP8\* was made by dissolving an appropriate amount of freshly expressed and purified VP8\* adhesion protein in TSM binding buffer to a final concentration of  $200 \mu\text{g mL}^{-1}$  protein. Biotinylated anti-GST antibody and the streptavidin fluorophore were mixed in the same vial containing TSM binding buffer to a final concentration of  $1 \mu\text{g mL}^{-1}$  and  $3 \mu\text{g mL}^{-1}$ , respectively. To screen the array,  $100 \mu\text{L}$  of VP8\* solution was added to a subarray and incubated for 1 h. The plate was washed, after which the antibody/fluorophore solution ( $100 \mu\text{L}$ ) was added. The plate was incubated in the dark for 1 h before being washed, dried, and analyzed.

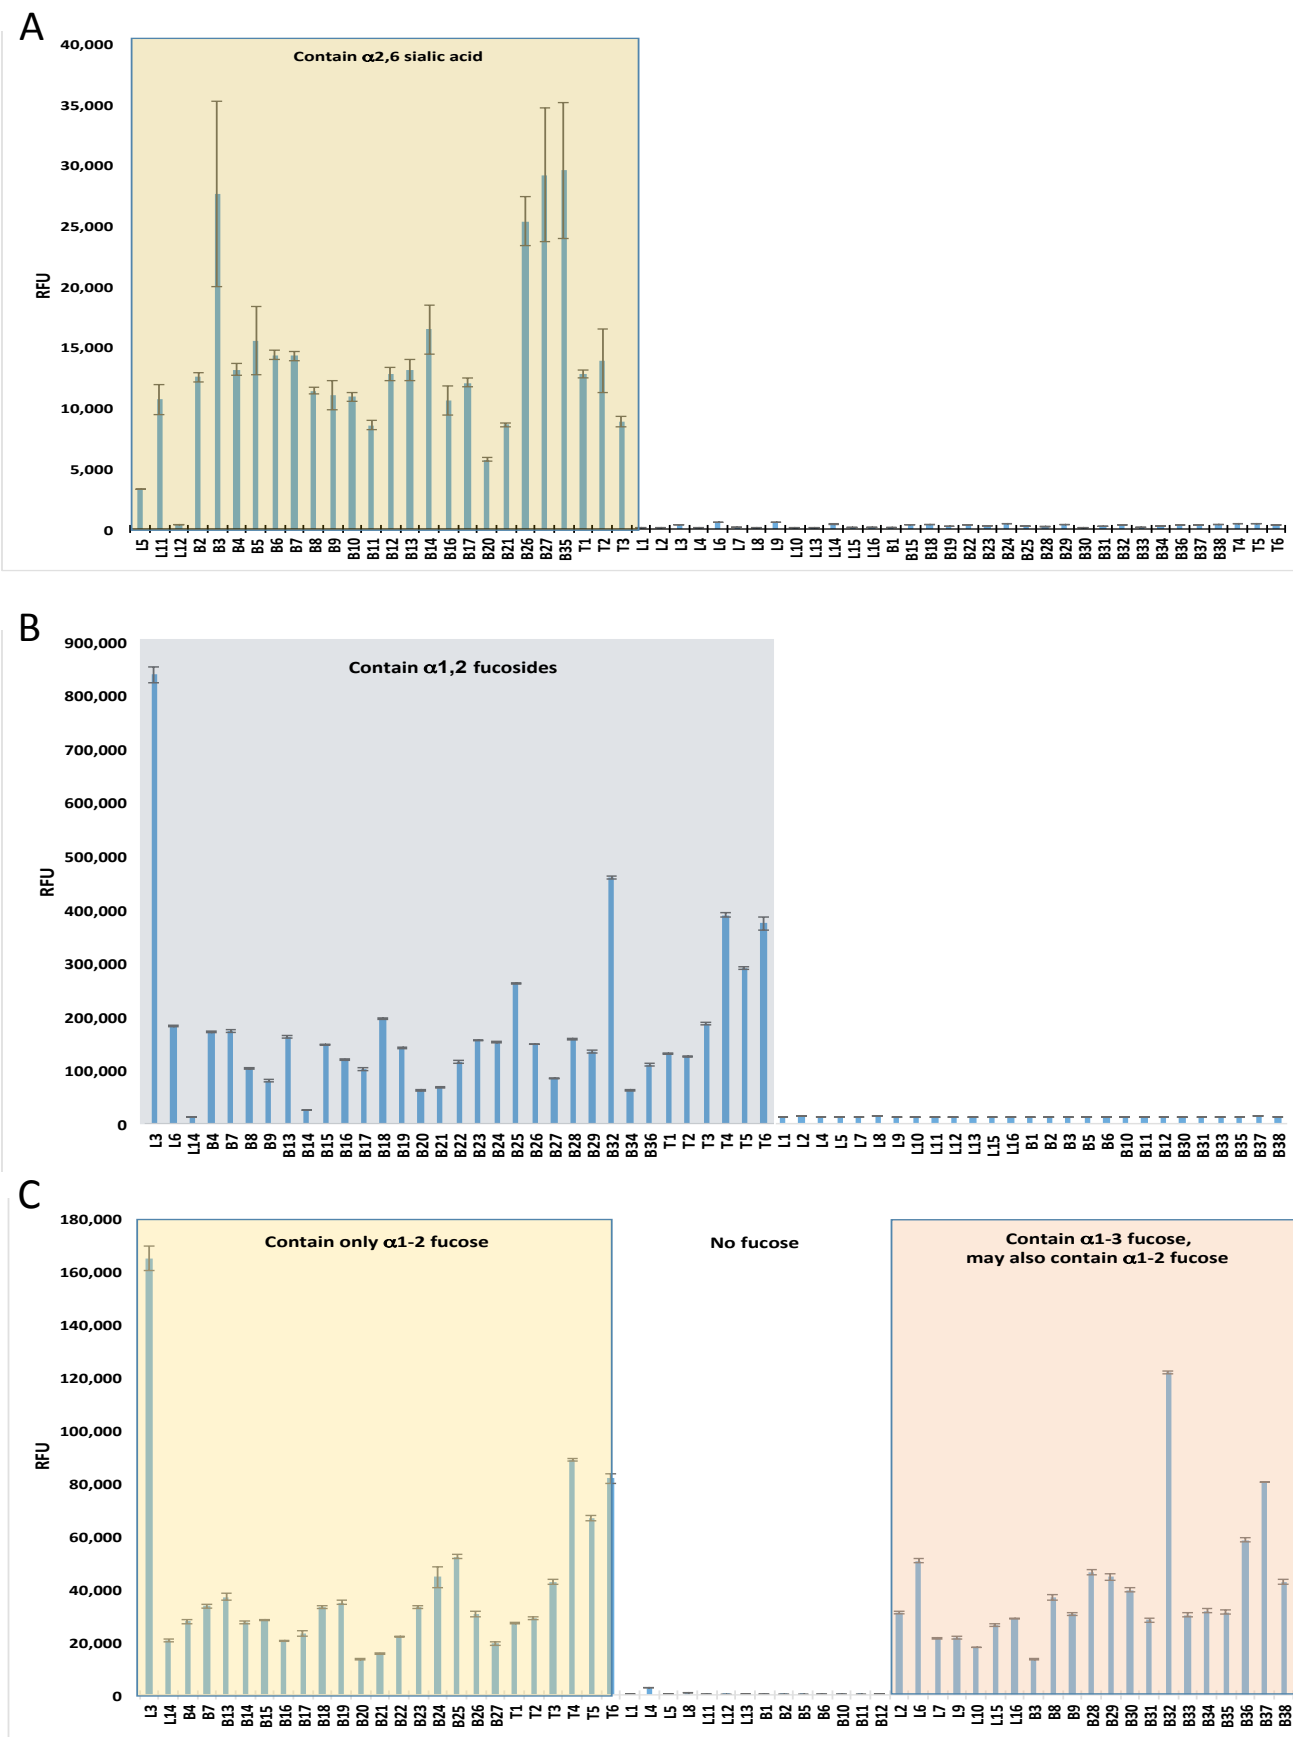

**Fig. S22.** Screening of the HMO library. Microarray results of the HMO library at 100  $\mu\text{M}$ . (A) *Sambucus nigra* agglutinin (SNA; 10  $\mu\text{g mL}^{-1}$ ) for  $\alpha$ 2,6 sialic acid detection. (B) *Ulex europaeus* agglutinin I (UEA; 10  $\mu\text{g mL}^{-1}$ ) for  $\alpha$ 1,2-fucose detection. (C) *Aleuria aurantia* lectin (AAL; 1  $\mu\text{g mL}^{-1}$ ) for  $\alpha$ 1,2-  $\alpha$ 1,3- and  $\alpha$ 1-6 fucose detection.

## 5. References

1. Prudden AR, Chinoy ZS, Wolfert MA, & Boons GJ (2014) A multifunctional anomeric linker for the chemoenzymatic synthesis of complex oligosaccharides. *Chem. Commun.* 50:7132-7135.
2. Katritzky AR, Yoshioka M, Narindoshvili T, Chung A, & Johnson JV (2008) Fluorescent labeling of peptides on solid phase. *Org. Biomol. Chem.* 6:4582-4586.
3. Meng L, et al. (2013) Enzymatic basis for *N*-glycan sialylation: structure of rat alpha2,6-sialyltransferase (ST6GAL1) reveals conserved and unique features for glycan sialylation. *J. Biol. Chem.* 288:34680-34698.
4. Phan J, et al. (2002) Structural basis for the substrate specificity of tobacco etch virus protease. *J. Biol. Chem.* 277:50564-50572.
5. Barb AW, et al. (2012) NMR characterization of immunoglobulin G Fc glycan motion on enzymatic sialylation. *Biochemistry* 51:4618-4626.
6. Vandersall-Nairn AS, Merkle RK, O'Brien K, Oeltmann TN, & Moremen KW (1998) Cloning, expression, purification, and characterization of the acid alpha-mannosidase from *Trypanosoma cruzi*. *Glycobiology* 8:1183-1194.
7. Beckett D, Kovaleva E, & Schatz PJ (1999) A minimal peptide substrate in biotin holoenzyme synthetase-catalyzed biotinylation. *Protein Sci.* 8:921-929.
8. Pedelacq JD, Cabantous S, Tran T, Terwilliger TC, & Waldo GS (2006) Engineering and characterization of a superfolder green fluorescent protein. *Nat. Biotechnol.* 24:79-88.
9. Heimburg-Molinaro J, Song X, Smith DF, & Cummings RD (2011) Preparation and analysis of glycan microarrays. *Curr. Protoc. Protein Sci.* 64:12.10.11-12.10.29.

## 6. Abbreviations

|               |                                                                                    |
|---------------|------------------------------------------------------------------------------------|
| AAL           | <i>Aleuria aurantia</i> lectin                                                     |
| B3GALT5       | $\beta$ 1,3-galactosyltransferase, polypeptide 5                                   |
| B3GNT2        | $\beta$ 1,3- <i>N</i> -acetylglucosaminyltransferase 2                             |
| CMP-Neu5Ac    | cytidine-5'-monophospho- <i>N</i> -acetylneuraminic acid                           |
| FUT1          | galactoside $\alpha$ 2-fucosyltransferase 1                                        |
| FUT3 and FUT5 | lactosamine $\alpha$ 1,3-4 fucosyltransferase 3 and 5                              |
| FUT9          | lactosamine $\alpha$ 1,3-fucosyltransferase 9                                      |
| Gal           | galactose                                                                          |
| GalT1         | $\beta$ 1,4-galactosyltransferase                                                  |
| GCNT2         | <i>N</i> -acetyllactosaminide $\beta$ 1,6- <i>N</i> -acetylglucosaminyltransferase |
| GDP-Fuc       | guanosine 5'-diphospho- $\beta$ -L-fucose                                          |
| GlcNAc        | <i>N</i> -acetyl-glucosamine                                                       |
| HMO           | human milk oligosaccharide                                                         |
| LacNAc        | <i>N</i> -acetyl-lactosamine                                                       |
| LNnT          | lacto- <i>N</i> -neotetraose                                                       |
| MS            | mass spectrometry                                                                  |
| NHS           | <i>N</i> -hydroxysuccinimide                                                       |
| NOE           | nuclear Overhauser effect                                                          |
| SNA           | <i>Sambucus nigra</i> agglutinin                                                   |
| ST3GAL4       | $\beta$ -galactoside $\alpha$ 2,3-sialyltransferase 4                              |
| ST6GAL1       | $\beta$ -galactoside $\alpha$ 2,6-sialyltransferase 1                              |
| ST6GALNAc5    | <i>N</i> -acetylgalactosaminide $\alpha$ 2,6-sialyltransferase 5                   |
| Type 1 LacNAc | Gal $\beta$ 1,3GlcNAc, 1 lacto- <i>N</i> -biose                                    |
| Type 2 LacNAc | Gal $\beta$ 1,4GlcNAc; <i>N</i> -acetyllactosamine                                 |
| UDP           | uridine-5'-diphosphate                                                             |
| UEA           | <i>Ulex europaeus</i> agglutinin I                                                 |
